# Supplementary material for: Local features determine Ty3 targeting frequency at RNA polymerase III transcription start sites
Source: HighWire-hosted journal article supplement (doi:10.1101/gr.240861.118), 2019-06-27
Supplement: Supplemental__Table_S1-S6.xlsx [file Supplemental__Table_S1-S6.xlsx]

## Sheet: Table S1
Supplemental Table S1. Strains, plasmids and primers
Strains
Strain	Genotype	Reference
BY4741	MATα his3Δ1 leu2Δ0 met15Δ0 ura3Δ0	Brachmann et al. 1998
yKP1976	BY4741 3XFLAG-8XGly-loxP-BRF1	This study
yKP1983	BY4741 3XFLAG-8XGly-loxP-RPC34	This Study
yMN3/DBY12395	MATα ura3∆ leu2∆0::ACT1pr-Z4EV-NatMX	McIsaac et al. 2013
Plasmids
Plasmid Name	Description	E. coli Marker	S. cerevisiae Marker	Reference
pGal-Ty3-8N	Gal Inducible Ty3 with 8N random tag and Illumina PBS cloned into pKN3097	Ampicillin	URA3	This study
pMN10	KanMX-Z4EVpr	Ampicillin		McIsaac et al. 2013
pBF3038	CreA recoded for S. cerevisiae	Ampicillin	LEU2	Fang et al., 2010
pKP3915	β-estradiol induced expression vector. The empty Z4 promoter-CYC1 terminator cassette and artificial transcription factor (ATF) under ACT1 promoter	Ampicillin	URA3; KAN-MX	this study
pKP4010	N-terminally 3X FLAG tagged Ty3 Integrase cloned into pKP3915	Ampicillin	URA3; KAN-MX	this study
pXP422	High copy 2µ expression plasmid	Ampicillin	LEU2	Fang et al., 2010
pKP4036	The tQ(CUG)M tRNA with flanking genomic sequence (KP5331/KP5332) cloned into the NdeI/BamHi site of pXP422	Ampicillin	LEU2	This study
pKP4037	Chimeric pKP4036 with 25 bp of upstream tQ(UUG)B sequence Primers KP5331/KP4997 and KP4998/KP5332	Ampicillin	LEU2	This study
pKP4038	Chimeric pKP4036 with 75 bp of upstream tQ(UUG)B sequence KP5331/KP5101 and KP5102/KP5332	Ampicillin	LEU2	This study
pKP4039	The tQ(UUG)B tRNA with flanking genomic sequence (KP5333/KP5334) cloned into the NdeI/BamHi site of pXP422	Ampicillin	LEU2	This study
pKP4040	Chimeric pKP4039 with 25 bp of upstream tQ(CUG)M sequence Primers KP5333/KP5000 and KP5001/KP5334	Ampicillin	LEU2	This study
pKP4041	Chimeric pKP4039 with 75 bp of upstream tQ(CUG)M sequence KP5333/KP5103 and KP5104/KP5334	Ampicillin	LEU2	This study
pKP4042	The tV(UAC)D tRNA with flanking genomic sequence (KP5335/KP5336) cloned into the NdeI/BamHi site of pXP422
pKP4044	The tV(AAC)D tRNA with flanking genomic sequence (KP5337/KP5338) cloned into the NdeI/BamHi site of pXP422
pKP4054	pKP4036 but with tQ(CUG)M extended at the 3' end for measuring transcription. Primers: KP4996/KP5389 and KP5406/KP4999	Ampicillin	LEU2	This study
pKP4057	pKP4037 but with tQ(CUG)M extended at the 3' end for measuring transcription. Primers: KP4996/KP5389 and KP5406/KP4999	Ampicillin	LEU2	This study
pKP4058	pKP4038 but with tQ(CUG)M extended at the 3' end for measuring transcription. Primers: KP4996/KP5389 and KP5406/KP4999	Ampicillin	LEU2	This study
pKP4059	pKP4039 but with tQ(UUG)B extended at the 3' end for measuring transcription. Primers: KP4996/KP5403 and KP5404/KP4999	Ampicillin	LEU2	This study
pKP4060	pKP4040 but with tQ(UUG)B extended at the 3' end for measuring transcription. Primers: KP4996/KP5403 and KP5404/KP4999	Ampicillin	LEU2	This study
pKP4061	pKP4041 but with tQ(UUG)B extended at the 3' end for measuring transcription. Primers: KP4996/KP5403 and KP5404/KP4999	Ampicillin	LEU2	This study
pCR®2.1®	TA TOPO Cloning Vector	Kanamycin		ThermoFisher Scientific
pFS4096	pCR®2.1® + qPCR amplicon KP4660/VB2275 from Ty3 transposed pKP4036	Kanamycin		This study
pFS4097	pCR®2.1® + qPCR amplicon KP4660/VB2275 from Ty3 transposed pKP4039	Kanamycin		This study
pFS4098	pCR®2.1® + qPCR amplicon KP4660/VB2275 from Ty3 transposed pKP4042	Kanamycin		This study
pFS4099	pCR®2.1® + qPCR amplicon KP4660/VB2275 from Ty3 transposed pKP4044	Kanamycin		This study
pFS4100	pCR®2.1® + qPCR amplicon KP4660/KP4996 from Ty3 transposed pKP4036	Kanamycin		This study
pFS4101	pCR®2.1® + qPCR amplicon KP4660/KP4996 from Ty3 transposed pKP4039	Kanamycin		This study
pFS4102	pCR®2.1® + qPCR amplicon KP4660/KP4996 from Ty3 transposed pKP4042	Kanamycin		This study
pFS4103	pCR®2.1® + qPCR amplicon KP4660/KP4996 from Ty3 transposed pKP4044	Kanamycin		This study
Primers
Primer Name	Sequence 5' - 3'	Description
KP5331	taatcatatgCGGTTTTCCGTACCAGTACAA	Above
KP5332	tatcggatccGAGCGATTGTATCTGTATAGAGGTTG	Above
KP5333	taatcatatgTGAAAAACGATGTACTTCCAACA	Above
KP5334	tatcggatccCAGCATCGAGGTGGCTTATT	Above
KP5335	gttcCATATGTAGGCGAACAGGCCTTAAAA	Above
KP5336	acatGGATCCCAGCAATGTTTACCGGCTTA	Above
KP5337	gttcCATATGTCTGGCCAGCTAAAAAGACG	Above
KP5338	acatGGATCCCCGTCTAGTATCCGGTAGTCACC	Above
KP4997	ACACTATAGGACCCCTTTTATTGATGGTATTTCTGACATAAAACTTCCGGTTTTATGGAA	Above
KP4998	GGAAGTTTTATGTCAGAAATACCATCAATAAAAGGGGTCCTATAGTGTAGTGGTTATCAC	Above
KP4999	GCTGTCGCCGAAGAAGTTAA	Above
KP5000	CACTATAAAACTTTTTCTTCTGTTGTTAGTGTACACATTTTTTAAATTGAGTGGTTTGAA	Above
KP5001	AAAAAATGTGTACACTAACAACAGAAGAAAAAGTTTTATAGTGTAGTGGTTATCACTTTC	Above
KP5101	ATTTTTTAAATTGAGTGGTTTGAAAAATAATTGATCAATAGGAATTACCAAACAATATCGCAAGCAATGGATCT	Above
KP5102	TTTCAAACCACTCAATTTAAAAAATTGTCAGAAATACCATCAATAAAAGGGGTCCTATAGTGTAGTGGTTATCAC	Above
KP5103	TAAAACTTCCGGTTTTATGGAACCTTTTTAAGAAAGATGGTCCCTATTTTTTGAGAAATAGATGAATTTTGGAATAATTG	Above
KP5104	AGGTTCCATAAAACCGGAAGTTTTAGTGTACACTAACAACAGAAGAAAAAGTTTTATAGTGTAGTGGTTATCACTTTC	Above
KP4660	CTCCACGACGCTCTTCCGATC	Ty3 LTR Forward primer for sense/anti-sense plasmid transposition qPCR assay
VB2275	CCTATCGCCACTATCTTGTCTGCT	Ty3 plasmid sense transposition qPCR assay, Forward
KP4996	TAACTATGCGGCATCAGAGC	Ty3 plasmid sense transposition qPCR assay, Reverse
BH4274	ACCAAATGCGGTGTTCTTGT	Ty3 plasmid transposition qPCR assay, LEU2 Forward
BH4275	GCCGTTTTGTTAGGTGCTGT	Ty3 plasmid transposition qPCR assay, LEU2 Reverse
XQ3689	AATGATACGGCGACCACCGAGATCTACACTCTTTCCCTACACGACGCTCTTCCGATCT	Illumina universal forward primer
KP5112	CAAGCAGAAGACGGCATACG	Reverse to 3869
KP4007	GATTGTCAAGACACTCCACGA	PCR round 1 Retro-seq Forward
XQ3678	GTGACTGGAGTTCAGACGTGT	PCR round 1 Retro-seq Reverse
KP4060	P-GATCGGAAGAGC-N	Adapter for Retro-seq Libraries
XQ3677	GTGACTGGAGTTCAGACGTGTGCTCTTCCGATC-T	Adapter for Retro-seq Libraries
XQ3695	CAAGCAGAAGACGGCATACGAGATCGTGATGTGACTGGAGTTCAGACGTGT	Multiplex Primer for Retro-seq Library #1
XQ3696	CAAGCAGAAGACGGCATACGAGATACATCGGTGACTGGAGTTCAGACGTGT	Multiplex Primer for Retro-seq Library #2
KP4149	CAAGCAGAAGACGGCATACGAGATGCCTAAGTGACTGGAGTTCAGACGTGT	Multiplex Primer for Retro-seq Library #3
KP5188	P-GATCGGAAGAGCGTCGTGTAGGGAAAGAGTGTAGATCTCGGTGGTCGCCGTATCATT	Adapter oligo for ChIP-seq Libraries
KP4838	CAAGCAGAAGACGGCATACGAGATCGTGATGTGACTGGAGTTCAGACGTGTGCTCTTCCGATCT	Multiplex Adapeter with 5188; Brf1/Integrase ChIP Input #1
KP4845	CAAGCAGAAGACGGCATACGAGATACATCGGTGACTGGAGTTCAGACGTGTGCTCTTCCGATCT	Multiplex Adapeter with 5188; Brf1/Integrase ChIP Input #2
KP4846	CAAGCAGAAGACGGCATACGAGATGCCTAAGTGACTGGAGTTCAGACGTGTGCTCTTCCGATCT	Multiplex Adapeter with 5188; WT BY4741 ChIP Input; Integrase ChIP IP #1
KP4966	CAAGCAGAAGACGGCATACGAGATTGGTCAGTGACTGGAGTTCAGACGTGTGCTCTTCCGATCT	Multiplex Adapeter with 5188; WT BY4741 ChIP Input; Integrase ChIP IP #2
KP4967	CAAGCAGAAGACGGCATACGAGATCACTGTGTGACTGGAGTTCAGACGTGTGCTCTTCCGATCT	Multiplex Adapeter with 5188; Brf1 ChIP IP #2; WT BY4741+pKP3915 ChIP Input
KP4968	CAAGCAGAAGACGGCATACGAGATATTGGCGTGACTGGAGTTCAGACGTGTGCTCTTCCGATCT	Multiplex Adapeter with 5188; WT BY4741 ChIP IP; ; WT BY4741+pKP3915 ChIP Input
KP4969	CAAGCAGAAGACGGCATACGAGATGATCTGGTGACTGGAGTTCAGACGTGTGCTCTTCCGATCT	Multiplex Adapeter with 5188; Rpc34 ChIP Input #3
KP4970	CAAGCAGAAGACGGCATACGAGATTCAAGTGTGACTGGAGTTCAGACGTGTGCTCTTCCGATCT	Multiplex Adapeter with 5188; Rpc34 ChIP Input #4
KP4971	CAAGCAGAAGACGGCATACGAGATCTGATCGTGACTGGAGTTCAGACGTGTGCTCTTCCGATCT	Multiplex Adapeter with 5188; Rpc34 ChIP IP #3
KP4972	CAAGCAGAAGACGGCATACGAGATAAGCTAGTGACTGGAGTTCAGACGTGTGCTCTTCCGATCT	Multiplex Adapeter with 5188; Rpc34 ChIP IP #4
KP5392	CAGCAACGGACTAGGATGAGT	Reverse primer for tRNA transcription qPCR assay; binds extended tRNA 3' end
KP5393	CCTATAGTGTAGTGGTTATCACTTTCG	Forward primer for tQ(CUG)M tRNA transcription quantification by RT-qPCR
KP5407	TTTTATAGTGTAGTGGTTATCACTTTCG	Forward primer for tQ(UUG)B tRNA transcription quantification by RT-qPCR
KP5485	GTCCAATGGTCCAGTGGTTC	Forward primer for tV(UAC)D tRNA transcription quantification by RT-qPCR
KP5505	TCGTGGTCTAGTCGGTTATGG	Forward primer for tV(AAC)M3 tRNA transcription quantification by RT-qPCR
KP5107	CCAAACATGTTGCTGGTGAT	Plasmid transcription qPCR assay, LEU2 Forward
KP5108	CCACCATTGCCTATTTGGTC	Plasmid transcription qPCR assay, LEU2 Reverse
KP5459	GCGAGAGACTCGAAtgga	Plasmid transcription qPCR assay, SUP61 Forward
KP5460	AAACGACACCAGCAGGATTT	Plasmid transcription qPCR assay, SUP61 Reverse
KP4691	CGGTTTTCCGTACCAGTACAA	ChIP-qPCR tQ(CUG)M genomic DNA Forward
KP5182	TCGTAAAATACGAAAAATGAAGG	ChIP-qPCR tQ(CUG)M genomic DNA Reverse
KP4906	TCAATTATTTTTCAAACCACTCAA	ChIP-qPCR tQ(UUG)B genomic DNA Forward
KP4907	CATATCTGCGAGATCTCCATTC	ChIP-qPCR tQ(UUG)B genomic DNA Reverse
KP4950	TCGTCGACACTGTAAAATAAATCTG	ChIP-qPCR tV(UAC)D genomic DNA Forward
KP4951	GGAAACCCATTGGAAATGACT	ChIP-qPCR tV(UAC)D genomic DNA Reverse
KP4952	TGCGCAATAGCGTTCTTGTA	ChIP-qPCR tV(AAC)M3 genomic DNA Forward
KP4953	GTTGGAGAATTCTGTATAAAGAGTATG	ChIP-qPCR tV(AAC)M3 genomic DNA Reverse
KP4908	GACGGACTCATAATTGAATGGTT	ChIP-qPCR tY(GUA)M2 genomic DNA Forward
KP4909	CCTTAAAGCAATCCCTAATACATGA	ChIP-qPCR tY(GUA)M2 genomic DNA Reverse
KP4910	TCTGCGTCTCATTGGAAGAA	ChIP-qPCR tY(GUA)F1 genomic DNA Forward
KP4911	TTGAAAGCTGCAAGATTTAAAAA	ChIP-qPCR tY(GUA)F1 genomic DNA Reverse
KP4921	CAATGGATTCTGGTATGTTCTAGC	ChIP-qPCR Actin genomic DNA Forward
KP4922	TTCCAAATTTCAAGCCCCTA	ChIP-qPCR Actin genomic DNA Reverse

## Sheet: Table S2
Supplemental Table S2. Hit summary per cluster by replicate
Cluster	Upstream	Chrom	Strand	Start Pos	Stop Pos	Wt 1 Tags/Cluster (Freq of 8401)*10000	Wt 2 Tags/Cluster (Freq of 11823)*10000	Wt 3 Tags/Cluster (Freq of 12152)*10000	Mean Tags/Cluster	StndDev	Wt 1 Reads/Cluster (Freq of 34923713)*10000	Wt 2 Reads/Cluster (Freq of 35625797)*10000	Wt 3 Reads/Cluster (Freq of 52289998)*10000	Mean Reads/Cluster	StndDev
CLUST690	RDN5-1	chrXII	+	459677	459797	251.161	257.972	241.113	250.082	4.89663	50.6619	131.58	105.264	95.8354	23.83
CLUST819	tQ(CUG)M	chrXIII	-	808246	808317	127.366	97.268	112.739	112.457	8.68961	97.607	82.1935	91.3685	90.3897	4.47633
CLUST133	tV(UAC)D	chrIV	-	488797	488870	88.0848	78.6602	102.041	89.5953	6.79152	76.1265	76.3944	108.432	86.9844	10.7243
CLUST608	tT(CGU)K	chrXI	-	46735	46806	95.2268	85.4267	73.239	84.6308	6.35979	73.6502	74.208	41.4615	63.1066	10.8238
CLUST379	tL(GAG)G	chrVII	+	700675	700756	95.2268	77.8144	72.4161	81.8191	6.88258	113.235	79.0102	69.781	87.3421	13.2178
CLUST454	tG(GCC)G2	chrVII	-	930953	931023	82.1331	79.506	81.4681	81.0357	0.788567	91.3007	65.6782	72.7944	76.5911	7.63629
CLUST041	tV(UAC)B	chrII	-	326792	326865	76.1814	77.8144	86.4055	80.1338	3.17111	88.4459	97.876	118.203	101.508	8.77999
CLUST009	tA(UGC)A	chrI	+	166267	166339	80.9427	80.3519	76.5306	79.2751	1.38279	61.3712	86.034	76.7361	74.7138	7.19099
CLUST198	tG(CCC)D	chrIV	-	1257008	1257079	80.9427	75.277	78.1764	78.1321	1.63571	77.3348	68.2031	72.8059	72.7813	2.63614
CLUST1022	tS(UGA)P	chrXVI	+	689565	689646	85.7041	61.7441	78.9993	75.4825	7.13669	90.6911	64.7096	79.7497	78.3834	7.53127
CLUST600	tL(UAG)J	chrX	+	617919	618019	73.8007	64.2815	83.1139	73.732	5.43656	70.4999	66.6517	98.9692	78.707	10.1919
CLUST725	tE(UUC)L	chrXII	+	797178	797249	72.6104	71.048	76.5306	73.3963	1.63076	75.7193	82.5057	86.4913	81.5721	3.14444
CLUST825	tY(GUA)M2	chrXIII	+	837928	838016	71.4201	74.4312	65.0099	70.287	2.77808	90.6204	91.134	68.1488	83.301	7.57758
CLUST655	tK(UUU)K	chrXI	+	578965	579060	59.5167	81.1977	69.9473	70.2206	6.26024	80.338	87.1268	64.4789	77.3145	6.71038
CLUST528	tS(UGA)I	chrIX	+	248850	248931	76.1814	71.8938	59.2495	69.1082	5.08238	79.3355	67.4921	72.1455	72.991	3.44493
CLUST011	tS(AGA)A	chrI	-	182522	182603	84.5137	63.4357	59.2495	69.0663	7.81768	78.4152	75.5879	68.3817	74.1283	2.98695
CLUST609	tN(GUU)K	chrXI	+	74624	74697	73.8007	68.5105	64.187	68.8327	2.77993	62.4934	54.6784	59.7479	58.9732	2.28901
CLUST873	tP(AGG)N	chrXIV	-	631846	631917	63.0877	71.8938	70.7702	68.5839	2.76717	55.2842	70.4153	58.4708	61.3901	4.60539
CLUST837	tG(UCC)N	chrXIV	-	96241	96312	64.2781	76.9686	64.187	68.4779	4.24545	96.6063	88.6245	87.1471	90.7926	2.93795
CLUST738	tL(UAA)L	chrXII	-	962972	963055	80.9427	68.5105	55.135	68.1961	7.45173	98.1889	97.1855	51.4485	82.2743	15.4156
CLUST477	tQ(UUG)H	chrVIII	+	134321	134392	60.7071	66.8189	74.8848	67.4703	4.1057	50.9553	83.8656	83.0187	72.6132	10.8317
CLUST319	tV(AAC)G3	chrVII	-	73829	73902	59.5167	65.1273	75.7077	66.7839	4.74676	46.9429	55.4143	68.9512	57.1028	6.40911
CLUST183	tF(GAA)D	chrIV	-	1095370	1095461	48.8037	65.9731	77.3535	64.0434	8.2979	25.9337	59.949	72.9793	52.954	14.024
CLUST643	tR(ACG)K	chrXI	+	490968	491040	66.6587	56.6692	67.4786	63.6022	3.47456	48.1217	46.5766	46.7458	47.1481	0.489278
CLUST489	tP(UGG)H	chrVIII	-	388893	388995	60.7071	67.6647	60.8953	63.089	2.28849	81.5958	76.3556	48.7015	68.8843	10.2042
CLUST923	tK(UUU)O	chrXV	+	438643	438738	64.2781	51.5943	69.9473	61.9399	5.4255	47.5018	39.2845	59.3842	48.7235	5.83436
CLUST227	tM(CAU)E	chrV	+	100133	100204	67.8491	54.9776	61.7182	61.515	3.71707	96.9467	74.736	70.0383	80.5737	8.2981
CLUST031	tI(AAU)B	chrII	+	197494	197567	70.2297	54.1318	60.0724	61.478	4.69992	50.8368	27.3139	37.4399	38.5302	6.81232
CLUST180	tV(CAC)D	chrIV	-	1075472	1075544	66.6587	55.8234	55.9579	59.48	3.58958	80.3242	70.8512	65.7017	72.2924	4.28223
CLUST964	tM(CAU)O2	chrXV	+	976421	976493	57.1361	67.6647	51.0204	58.6071	4.86077	68.6015	47.9518	46.5104	54.3546	7.13562
CLUST782	tW(CCA)M	chrXIII	-	379303	379408	55.9457	62.5899	54.312	57.6159	2.53131	70.5501	55.617	59.9394	62.0355	4.43638
CLUST866	tT(AGU)N2	chrXIV	-	560693	560765	58.3264	59.2066	55.135	57.556	1.2369	90.9308	56.8563	72.7353	73.5075	9.84403
CLUST1029	tT(UGU)P	chrXVI	+	744284	744355	46.423	60.8982	65.0099	57.4437	5.63672	49.0744	65.534	63.787	59.4651	5.21978
CLUST728	tR(CCG)L	chrXII	+	818609	818680	49.994	65.1273	56.7808	57.3007	4.37632	21.6145	51.7078	50.5242	41.2822	9.83975
CLUST1042	tG(GCC)P2	chrXVI	+	860379	860449	59.5167	57.515	51.8433	56.2917	2.29802	54.2133	55.5508	69.1434	59.6358	4.76945
CLUST759	tP(UGG)M	chrXIII	-	196068	196170	49.994	66.8189	51.8433	56.2188	5.32689	56.147	82.4108	39.8214	59.4597	12.4056
CLUST474	tT(AGU)H	chrVIII	-	116107	116179	69.0394	49.9027	48.5517	55.8313	6.61557	69.1275	45.4106	60.0914	58.2099	6.91081
CLUST007	tP(UGG)A	chrI	+	139152	139254	63.0877	47.3653	55.9579	55.4703	4.54521	91.7978	55.5929	49.8388	65.7431	13.1328
CLUST545	tT(AGU)J	chrX	-	59100	59172	47.6134	52.4402	65.0099	55.0211	5.18509	22.3705	58.6625	72.6445	51.2258	14.9816
CLUST432	tG(UCC)G	chrVII	+	779616	779687	51.1844	49.9027	61.7182	54.2685	3.74322	43.2884	52.567	62.8459	52.9004	5.64823
CLUST1031	tK(UUU)P	chrXVI	-	769207	769302	34.5197	59.2066	67.4786	53.735	9.89994	25.6164	54.392	56.5523	45.5203	9.97144
CLUST316	tK(CUU)F	chrVI	-	226688	226760	66.6587	37.2156	56.7808	53.5517	8.65149	76.335	34.3998	45.2195	51.9848	12.5693
CLUST437	tV(AAC)G2	chrVII	+	823482	823555	65.4684	50.7485	44.4371	53.5514	6.23085	62.148	61.7056	67.6977	63.8504	1.92785
CLUST801	tM(CAU)M	chrXIII	-	572883	572955	64.2781	47.3653	48.5517	53.3983	5.45063	79.298	52.9215	50.8336	61.0177	9.15999
CLUST515	tT(AGU)I1	chrIX	+	175031	175103	52.3747	50.7485	54.312	52.4784	1.03	83.5833	67.4581	76.5341	75.8585	4.66718
CLUST104	tG(GCC)D1	chrIV	+	83548	83618	47.6134	58.3608	51.0204	52.3315	3.17102	40.1535	66.4333	70.4749	59.0206	9.50539
CLUST382	YGR109W-B	chrVII	+	707610	712254	28.568	57.515	69.1244	51.7358	12.0589	4.14675	37.5259	23.931	21.8679	9.69079
CLUST910	tS(GCU)O	chrXV	+	274673	274773	59.5167	54.9776	39.4997	51.3313	6.05921	78.2162	77.8835	54.5049	70.2015	7.8489
CLUST973	tW(CCA)P	chrXVI	-	56169	56274	57.1361	44.8279	49.3746	50.4462	3.59324	86.8324	73.9094	76.9428	79.2282	3.90164
CLUST622	tK(CUU)K	chrXI	+	202999	203071	51.1844	47.3653	52.6662	50.4053	1.57905	88.6077	70.5405	55.1589	71.4357	9.6662
CLUST446	tK(CUU)G3	chrVII	+	876394	876466	49.994	54.1318	46.0829	50.0696	2.3238	52.4085	41.0947	38.903	44.1354	4.18466
CLUST1033	tC(GCA)P2	chrXVI	-	775765	775836	53.5651	43.1363	52.6662	49.7892	3.33656	58.3059	47.1484	54.9887	53.481	3.30794
CLUST795	tL(CAA)M	chrXIII	+	504895	505008	44.0424	51.5943	52.6662	49.4343	2.71367	40.0716	55.4068	51.0908	48.8564	4.56567
CLUST480	tF(GAA)H1	chrVIII	-	237848	237939	58.3264	46.5195	41.1455	48.6638	5.07426	75.067	43.6877	40.3217	53.0255	11.0635
CLUST354	tL(CAA)G2	chrVII	+	423092	423205	45.2327	53.286	45.26	47.9262	2.67988	36.7905	51.543	36.6768	41.6701	4.93656
CLUST444	tL(CAA)G3	chrVII	-	857378	857491	47.6134	48.2111	46.9059	47.5768	0.377239	33.6345	39.8635	48.7705	40.7562	4.39214
CLUST339	tH(GUG)G2	chrVII	+	319781	319852	48.8037	40.5988	52.6662	47.3563	3.55794	68.1852	39.5593	60.8658	56.2034	8.58612
CLUST665	tS(AGA)L	chrXII	-	167944	168025	48.8037	48.2111	44.4371	47.1507	1.3675	58.7873	34.482	23.2218	38.8304	10.4945
CLUST310	tS(GCU)F	chrVI	-	191513	191613	48.8037	43.9821	48.5517	47.1125	1.5669	31.8428	51.0692	47.6378	43.5166	5.92034
CLUST911	tG(GCC)O2	chrXV	+	282164	282234	40.4714	49.0569	51.0204	46.8496	3.23908	53.5971	54.2073	35.0687	47.6244	6.28033
CLUST223	tG(GCC)E	chrV	-	61890	61960	51.1844	47.3653	41.9684	46.8394	2.67339	42.0754	40.6065	42.5946	41.7588	0.595327
CLUST530	tD(GUC)I1	chrIX	-	324303	324374	42.852	43.9821	53.4891	46.7744	3.37317	54.0933	41.3697	69.8187	55.0939	8.22773
CLUST646	tA(AGC)K2	chrXI	+	517988	518060	49.994	51.5943	38.6768	46.7551	4.06548	38.4149	50.798	30.3268	39.8466	5.95272
CLUST090	tQ(UUG)C	chrIII	-	168301	168372	44.0424	48.2111	45.26	45.8378	1.2376	33.3601	43.2013	48.2802	41.6139	4.37956
CLUST252	tA(UGC)E	chrV	-	312023	312095	53.5651	40.5988	42.7913	45.6517	4.00696	83.7471	49.2345	55.394	62.7919	10.6274
CLUST723	tS(GCU)L	chrXII	+	784354	784453	47.6134	45.6737	43.6142	45.6338	1.15463	40.8691	63.1225	50.3203	51.4373	6.44825
CLUST1019	tF(GAA)P2	chrXVI	-	622540	622631	49.994	45.6737	39.4997	45.0558	3.04518	61.9782	43.7391	48.58	51.4325	5.45493
CLUST792	tK(CUU)M	chrXIII	-	480621	480693	45.2327	37.2156	52.6662	45.0382	4.46127	32.8694	25.9203	41.6975	33.4957	4.56524
CLUST295	tP(UGG)F	chrVI	+	101376	101478	48.8037	43.9821	41.1455	44.6438	2.23536	29.3855	43.7119	38.3787	37.1587	4.18042
CLUST700	tL(UAG)L1	chrXII	-	592519	592619	40.4714	43.1363	48.5517	44.0531	2.3772	32.6981	43.7074	37.9719	38.1258	3.17903
CLUST380	tK(UUU)G2	chrVII	-	700953	701048	41.6617	51.5943	36.208	43.1547	4.50394	27.2228	38.9106	27.7189	31.2841	3.81594
CLUST067	tC(GCA)B	chrII	-	643007	643078	40.4714	43.1363	45.26	42.9559	1.38531	24.2987	39.6603	48.3102	37.4231	7.02121
CLUST752	ZOD1	chrXIII	+	91962	91970	48.8037	35.524	44.4371	42.9216	3.9077	52.3464	27.4119	35.2819	38.3467	7.35929
CLUST758	tG(GCC)M	chrXIII	-	183898	183968	39.281	43.9821	45.26	42.841	1.81783	50.9682	59.5695	68.2777	59.6051	4.99684
CLUST177	tE(CUC)D	chrIV	-	1017207	1017278	51.1844	36.3698	40.3226	42.6256	4.42892	69.0545	26.3927	47.983	47.8101	12.3157
CLUST448	tW(CCA)G2	chrVII	-	878710	878815	36.9004	45.6737	45.26	42.6114	2.85799	17.1205	43.203	24.0465	28.1233	7.80042
CLUST138	tL(UAA)D	chrIV	+	519743	519826	39.281	32.9866	55.135	42.4675	6.58921	36.2164	26.8238	60.699	41.2464	10.0972
CLUST232	tQ(UUG)E2	chrV	-	131082	131153	54.7554	42.2905	29.6248	42.2235	7.25467	75.303	47.5857	44.0604	55.6497	9.87919
CLUST693	RDN5-2	chrXII	+	468814	468932	11.9033	67.6647	46.9059	42.158	16.271	14.3367	29.2895	29.2071	24.2777	4.97059
CLUST676	tR(ACG)L	chrXII	+	374355	374427	54.7554	34.6782	37.0309	42.1548	6.33678	104.469	51.6185	50.5739	68.887	17.7933
CLUST948	tM(CAU)O1	chrXV	+	710201	710272	30.9487	52.4402	42.7913	42.0601	6.21482	24.6878	47.0667	37.2092	36.3213	6.47548
CLUST881	tL(UAA)N	chrXIV	-	726134	726217	44.0424	33.8324	46.9059	41.5935	3.96765	35.9741	44.8787	42.1103	40.9877	2.6311
CLUST893	YOL107W	chrXV	+	112102	113130	53.5651	33.8324	37.0309	41.4761	6.11459	48.8247	34.1811	44.3882	42.4647	4.33526
CLUST594	tR(CCU)J	chrX	+	538555	538626	40.4714	43.1363	40.3226	41.3101	0.914104	36.4431	48.7655	40.5165	41.9084	3.6246
CLUST324	tK(CUU)G1	chrVII	+	122269	122341	47.6134	38.9072	37.0309	41.1838	3.26008	36.2035	57.7837	50.5988	48.1953	6.34452
CLUST275	tV(AAC)E2	chrV	+	469457	469530	49.994	40.5988	32.9164	41.1698	4.93815	63.4471	55.3321	30.9023	49.8938	9.78048
CLUST1011	tG(GCC)P1	chrXVI	+	572269	572339	32.139	51.5943	39.4997	41.0777	5.67142	39.7352	69.6554	45.3303	51.5736	9.18404
CLUST086	tN(GUU)C	chrIII	+	127716	127789	40.4714	37.2156	45.26	40.9823	2.33624	22.4014	29.208	38.4643	30.0246	4.65491
CLUST774	tA(AGC)M1	chrXIII	-	321147	321219	42.852	38.0614	41.1455	40.6863	1.40187	38.0363	31.1617	27.429	32.209	3.10654
CLUST536	tE(UUC)I	chrIX	+	370417	370488	38.0907	43.1363	40.3226	40.5165	1.45975	32.0249	29.8127	29.7183	30.5186	0.753646
CLUST1038	tI(AAU)P1	chrXVI	+	819529	819602	34.5197	43.9821	42.7913	40.431	2.97558	22.8859	31.0634	31.2846	28.4113	2.76345
CLUST476	tS(AGA)H	chrVIII	-	133026	133107	34.5197	41.4446	45.26	40.4081	3.14349	30.2342	32.1441	43.6671	35.3485	4.19568
CLUST907	tN(GUU)O1	chrXV	+	228331	228404	42.852	33.8324	44.4371	40.3738	3.30259	26.0276	20.7294	37.3209	28.026	4.89268
CLUST913	tY(GUA)O	chrXV	+	288192	288280	42.852	43.9821	33.7393	40.1911	3.24237	35.1984	41.7355	32.21	36.3813	2.81266
CLUST038	tT(AGU)B	chrII	+	266378	266450	30.9487	35.524	53.4891	39.9873	6.87892	15.9622	33.4235	53.5951	34.327	10.8731
CLUST087	tG(GCC)C	chrIII	-	142701	142771	42.852	39.753	37.0309	39.8787	1.68158	7.97538	26.8802	14.5875	16.481	5.53888
CLUST591	tS(AGA)J	chrX	-	524012	524093	45.2327	42.2905	32.0935	39.8722	3.98103	62.4117	54.9265	44.9082	54.0821	5.07044
CLUST559	tR(ACG)J	chrX	+	233939	234011	36.9004	42.2905	40.3226	39.8378	1.57475	48.8757	40.0718	35.6181	41.5219	3.8952
CLUST261	snR52	chrV	-	431125	431216	34.5197	45.6737	38.6768	39.6234	3.25448	38.802	43.2004	45.2901	42.4309	1.91208
CLUST616	tR(UCU)K	chrXI	-	162487	162558	47.6134	39.753	31.2706	39.5457	4.7189	71.7166	35.4516	30.0838	45.7506	13.0751
CLUST017	tF(GAA)B	chrII	+	36398	36488	29.7584	45.6737	42.7913	39.4078	4.89594	29.238	43.3641	53.1125	41.9048	6.93047
CLUST241	tH(GUG)E1	chrV	+	207357	207428	38.0907	42.2905	37.0309	39.1374	1.60595	37.09	43.51	38.012	39.5374	2.0041
CLUST593	tG(GCC)J2	chrX	+	531828	531898	38.0907	41.4446	37.8539	39.1297	1.15947	31.9004	23.1063	36.8221	30.6096	4.01168
CLUST377	tT(UGU)G1	chrVII	+	661749	661820	32.139	43.9821	40.3226	38.8146	3.50095	26.9619	33.0603	28.0446	29.3556	1.87854
CLUST999	tC(GCA)P1	chrXVI	-	435893	435964	36.9004	45.6737	33.7393	38.7711	3.56988	14.8017	53.443	43.5328	37.2592	11.5874
CLUST779	tF(GAA)M	chrXIII	+	352280	352370	54.7554	29.6033	31.2706	38.5431	8.12042	80.5198	30.6887	28.8212	46.6766	16.9302
CLUST926	tP(UGG)O2	chrXV	+	464450	464551	38.0907	36.3698	41.1455	38.5353	1.39644	36.6923	36.2866	63.8459	45.6083	9.11956
CLUST789	tV(AAC)M2	chrXIII	-	420588	420661	39.281	40.5988	35.3851	38.4217	1.5652	31.3449	52.1117	41.7086	41.7217	5.99486
CLUST498	tV(CAC)H	chrVIII	-	475706	475778	24.997	45.6737	44.4371	38.3693	6.69565	10.468	35.8173	37.2741	27.8531	8.70274
CLUST929	tN(GUU)O2	chrXV	+	487439	487512	47.6134	29.6033	37.8539	38.3568	5.20514	51.3571	29.1272	38.9101	39.7981	6.43255
CLUST960	tA(UGC)O	chrXV	-	854187	854259	34.5197	47.3653	32.9164	38.2671	4.57257	37.4282	30.2124	25.9365	31.1923	3.35334
CLUST043	tL(UAA)B2	chrII	+	347603	347686	36.9004	42.2905	35.3851	38.192	2.0954	44.3484	33.9995	27.6097	35.3192	4.87689
CLUST557	tD(GUC)J1	chrX	+	204735	204806	33.3294	35.524	45.26	38.0378	3.66627	37.1524	47.2467	52.3567	45.5852	4.46701
CLUST839	tT(AGU)N1	chrXIV	+	104805	104877	35.71	38.0614	40.3226	38.0313	1.33161	49.7748	42.5675	49.1455	47.1626	2.30473
CLUST303	tG(GCC)F1	chrVI	+	162228	162298	38.0907	38.9072	37.0309	38.0096	0.543149	25.2089	35.9627	24.8149	28.6622	3.65204
CLUST740	tN(GUU)L	chrXII	-	975983	976056	44.0424	32.9866	36.208	37.7457	3.28284	18.6996	23.8324	13.8388	18.7903	2.88528
CLUST915	tP(UGG)O1	chrXV	+	301097	301198	48.8037	35.524	27.156	37.1612	6.30254	46.345	53.9494	26.9105	42.4016	8.05063
CLUST1010	tF(GAA)P1	chrXVI	-	560198	560289	32.139	45.6737	32.9164	36.9097	4.38773	30.4661	45.8892	26.7078	34.3544	5.86858
CLUST225	tS(AGA)E	chrV	+	86604	86685	34.5197	39.753	36.208	36.8269	1.5421	37.4808	43.0862	26.5426	35.7032	4.85774
CLUST353	tV(AAC)G1	chrVII	-	412294	412367	42.852	31.2949	35.3851	36.5107	3.38338	46.4432	33.1019	37.6533	39.0661	3.91557
CLUST724	tD(GUC)L2	chrXII	+	793918	793989	33.3294	35.524	40.3226	36.392	2.06489	22.3957	27.7936	39.4259	29.8717	5.02481
CLUST838	tN(GUU)N1	chrXIV	+	102716	102789	45.2327	29.6033	33.7393	36.1918	4.67548	60.0177	19.574	35.3112	38.3009	11.7704
CLUST233	tK(CUU)E1	chrV	-	135425	135497	33.3294	38.0614	37.0309	36.1406	1.43673	16.4424	22.6614	24.787	21.2969	2.50361
CLUST566	tY(GUA)J1	chrX	+	354244	354332	33.3294	34.6782	40.3226	36.11	2.14196	30.4801	32.6659	40.9696	34.7052	3.19511
CLUST946	tV(AAC)O	chrXV	-	663812	663885	44.0424	30.4491	32.0935	35.5283	4.28341	54.5205	22.4191	26.7594	34.5664	10.0555
CLUST364	tD(GUC)G1	chrVII	+	531610	531681	33.3294	32.1407	40.3226	35.2642	2.55234	46.8175	34.1154	38.8149	39.9159	3.70786
CLUST034	tS(AGA)B	chrII	+	227075	227156	29.7584	37.2156	38.6768	35.2169	2.76167	15.9261	51.4015	53.8068	40.3782	12.2457
CLUST229	RPR1	chrV	-	117667	118035	42.852	28.7575	32.9164	34.842	4.1811	55.3727	56.9722	41.5336	51.2928	4.90142
CLUST010	tL(CAA)A	chrI	+	181141	181254	32.139	37.2156	34.5622	34.6389	1.46598	41.2021	32.1537	44.1752	39.177	3.61501
CLUST701	tI(UAU)L	chrXII	-	605300	605432	24.997	41.4446	37.0309	34.4909	4.91494	22.5291	31.1822	27.4171	27.0428	2.50493
CLUST630	tV(AAC)K1	chrXI	-	308144	308217	33.3294	36.3698	33.7393	34.4795	0.952531	37.4095	54.4692	62.0256	51.3015	7.28043
CLUST170	tY(GUA)D	chrIV	+	946312	946400	28.568	35.524	38.6768	34.2563	2.98619	42.8036	45.6329	55.4668	47.9678	3.83745
CLUST473	tV(AAC)H	chrVIII	-	85298	85371	40.4714	32.1407	28.8018	33.8047	3.46991	24.3164	20.7061	28.7678	24.5968	2.33145
CLUST234	tR(UCU)E	chrV	+	138666	138737	34.5197	30.4491	36.208	33.7256	1.70921	47.7718	34.1258	40.7481	40.8819	3.93983
CLUST851	tF(GAA)N	chrXIV	+	374869	374959	34.5197	27.9117	38.6768	33.7027	3.13434	30.7736	21.366	35.4307	29.1901	4.13661
CLUST905	tG(GCC)O1	chrXV	-	226611	226681	34.5197	33.8324	32.0935	33.4818	0.721983	55.6175	32.5882	27.5777	38.5945	8.63354
CLUST582	tL(UAA)J	chrX	-	424432	424515	34.5197	32.9866	32.9164	33.4742	0.523135	24.963	43.5827	36.7537	35.0998	5.4383
CLUST596	tY(GUA)J2	chrX	-	542956	543044	28.568	32.1407	39.4997	33.4028	3.21817	31.7947	29.6055	48.2	36.5334	5.86744
CLUST921	tR(ACG)O	chrXV	-	340299	340371	35.71	39.753	24.6873	33.3835	4.50199	43.5687	31.5631	21.8753	32.3357	6.27424
CLUST068	tE(UUC)B	chrII	+	645167	645238	36.9004	27.9117	33.7393	32.8505	2.63259	42.9238	26.8937	32.7437	34.1871	4.68344
CLUST756	tY(GUA)M1	chrXIII	+	168795	168883	35.71	30.4491	32.0935	32.7509	1.55386	13.7099	46.5379	36.7393	32.329	9.72981
CLUST265	tV(AAC)E1	chrV	+	438700	438773	29.7584	32.9866	35.3851	32.71	1.63018	34.6541	27.8329	50.0384	37.5085	6.56714
CLUST124	tK(UUU)D	chrIV	+	359577	359672	33.3294	29.6033	34.5622	32.4983	1.4906	38.8046	25.39	23.9252	29.3733	4.73457
CLUST517	tE(CUC)I	chrIX	+	197592	197663	40.4714	35.524	21.3957	32.4637	5.71533	47.3077	46.0484	18.319	37.225	9.46
CLUST431	tA(AGC)G	chrVII	+	774349	774421	29.7584	29.6033	37.8539	32.4052	2.72471	32.201	28.3749	29.8522	30.1427	1.11401
CLUST573	tR(UCU)J2	chrX	-	374506	374577	26.1874	37.2156	33.7393	32.3808	3.25524	21.2077	39.1377	50.1802	36.8418	8.44205
CLUST495	tT(UGU)H	chrVIII	+	466990	467061	24.997	42.2905	29.6248	32.3041	5.16881	38.2285	48.9011	28.047	38.3922	6.0206
CLUST351	tE(UUC)G2	chrVII	-	401527	401598	26.1874	32.1407	37.0309	31.7863	3.13528	17.2711	16.9276	25.4288	19.8758	2.77824
CLUST032	tG(GCC)B	chrII	-	197629	197699	30.9487	32.9866	31.2706	31.7353	0.632501	21.187	39.8644	14.279	25.1101	7.64189
CLUST529	tK(CUU)I	chrIX	-	300228	300300	34.5197	30.4491	29.6248	31.5312	1.51309	35.7376	40.2043	36.6994	37.5471	1.3573
CLUST301	tF(GAA)F	chrVI	-	157916	158007	24.997	43.1363	26.3331	31.4888	5.83649	39.5565	38.6596	22.4626	33.5596	5.55452
CLUST556	tA(AGC)J	chrX	-	197313	197385	39.281	23.6827	28.8018	30.5885	4.59063	31.4302	17.6207	38.2117	29.0875	6.05844
CLUST718	tL(UAG)L2	chrXII	+	732090	732190	27.3777	38.0614	25.5102	30.3164	3.90983	34.6673	39.6342	24.5229	32.9414	4.4468
CLUST357	tF(GAA)G	chrVII	-	440716	440807	29.7584	25.3743	35.3851	30.1726	2.8973	35.3502	17.9384	27.0949	26.7945	5.02859
CLUST313	tY(GUA)F2	chrVI	-	210619	210707	30.9487	29.6033	29.6248	30.0589	0.44493	27.4258	28.9001	22.2371	26.1877	2.0206
CLUST306	tG(GCC)F2	chrVI	-	180974	181044	30.9487	27.0659	32.0935	30.036	1.52139	27.4836	44.8223	48.5047	40.2702	6.48106
CLUST277	tR(ACG)E	chrV	-	492352	492424	28.568	22.8368	38.6768	30.0272	4.63043	20.0546	23.8574	45.9208	29.9443	8.06336
CLUST049	tR(UCU)B	chrII	+	405878	405949	35.71	23.6827	29.6248	29.6725	3.47209	43.8877	20.1497	29.266	31.1011	6.91371
CLUST368	tD(GUC)G2	chrVII	-	544577	544648	27.3777	27.0659	34.5622	29.6686	2.44846	37.5181	45.3438	44.7661	42.5427	2.51783
CLUST989	tM(CAU)P	chrXVI	-	338848	338919	38.0907	24.5285	26.3331	29.6508	4.25201	84.1248	35.4659	42.5927	54.0611	15.172
CLUST331	tL(CAA)G1	chrVII	+	205521	205634	30.9487	32.9866	24.6873	29.5408	2.49706	22.8034	38.9642	38.118	33.2952	5.25157
CLUST818	tA(AGC)M2	chrXIII	-	768369	768441	28.568	33.8324	25.5102	29.3035	2.43038	18.2821	34.6221	15.2503	22.7182	6.01596
CLUST084	YCR006C	chrIII	-	122530	123003	28.568	31.2949	27.9789	29.2806	1.02141	42.9602	35.3014	37.7852	38.6823	2.25595
CLUST1036	tN(GUU)P	chrXVI	+	810676	810749	36.9004	21.1452	28.8018	28.9491	4.54871	31.0414	21.8825	39.9321	30.952	5.21068
CLUST441	tG(GCC)G1	chrVII	+	845649	845719	26.1874	32.1407	27.156	28.4947	1.84434	12.8025	18.6233	20.4383	17.288	2.30317
CLUST143	tR(UCU)D	chrIV	+	568882	568953	23.8067	38.9072	22.2186	28.3108	5.31799	31.7154	31.5968	26.1526	29.8216	1.83481
CLUST312	tA(AGC)F	chrVI	-	204924	204996	27.3777	26.2201	31.2706	28.2894	1.52756	42.6659	22.7394	39.7531	35.0528	6.21384
CLUST874	tN(GUU)N2	chrXIV	+	632599	632672	17.855	36.3698	30.4477	28.2242	5.45916	9.71489	23.7642	16.2446	16.5746	4.05905
CLUST015	tL(UAA)B1	chrII	+	9583	9666	27.3777	23.6827	32.9164	27.9922	2.6832	23.9353	24.6322	43.2477	30.605	6.32451
CLUST580	tW(CCA)J	chrX	-	415931	416036	30.9487	26.2201	26.3331	27.834	1.55771	28.7504	26.1569	28.0952	27.6675	0.778624
CLUST336	tW(CCA)G1	chrVII	-	287350	287455	20.2357	28.7575	33.7393	27.5775	3.94256	11.7012	18.8779	35.643	22.074	7.09373
CLUST485	YHR125W	chrVIII	+	358858	359163	20.2357	27.9117	34.5622	27.5699	4.13924	11.1082	26.6708	36.6858	24.8216	7.44128
CLUST267	SCR1	chrV	+	441983	442504	21.426	21.991	38.6768	27.3646	5.65843	9.03713	23.9708	42.1543	25.0541	9.57545
CLUST083	tE(UUC)C	chrIII	-	82462	82533	27.3777	25.3743	28.8018	27.1846	0.994154	17.416	13.5068	20.4823	17.135	2.01855
CLUST765	tS(AGA)M	chrXIII	-	259158	259239	33.3294	17.762	30.4477	27.1797	4.78176	45.1086	10.8368	41.0876	32.3443	10.8162
CLUST255	tE(UUC)E2	chrV	+	354934	355005	22.6164	27.0659	31.2706	26.9843	2.49859	7.10663	30.4013	40.5368	26.0149	9.89654
CLUST780	tH(GUG)M	chrXIII	+	363064	363135	33.3294	22.8368	24.6873	26.9512	3.23353	45.0442	32.4464	28.9365	35.4757	4.89035
CLUST161	tQ(UUG)D3	chrIV	-	802731	802802	20.2357	30.4491	28.8018	26.4956	3.16585	6.72781	17.6987	16.5399	13.6555	3.47994
CLUST189	tX(XXX)D	chrIV	-	1150842	1150941	30.9487	27.0659	21.3957	26.4701	2.77377	16.9421	26.0892	26.8535	23.2949	3.18409
CLUST478	tA(AGC)H	chrVIII	-	146242	146314	27.3777	21.991	29.6248	26.3312	2.26494	85.7426	32.5584	54.839	57.7133	15.4201
CLUST321	tH(GUG)G1	chrVII	-	110625	110696	28.568	25.3743	23.8644	25.9356	1.38652	23.614	37.5315	20.6118	27.2524	5.21209
CLUST149	tI(AAU)D	chrIV	-	668007	668080	24.997	26.2201	26.3331	25.8501	0.427771	17.8008	24.6622	13.0901	18.5177	3.35976
CLUST516	tI(AAU)I1	chrIX	-	183440	183513	29.7584	27.9117	19.7498	25.8066	3.07496	20.0878	19.2013	23.7015	20.9968	1.37632
CLUST668	tA(UGC)L	chrXII	-	214883	214955	22.6164	31.2949	23.0415	25.6509	2.82467	22.4627	32.0911	28.8585	27.8041	2.82904
CLUST595	tD(GUC)J4	chrX	+	541508	541579	22.6164	26.2201	27.156	25.3308	1.38386	14.4429	25.5843	29.7719	23.2663	4.57434
CLUST203	tS(AGA)D3	chrIV	+	1305630	1305712	16.6647	23.6827	35.3851	25.2442	5.46023	8.29837	18.1652	33.6785	20.0474	7.38681
CLUST174	tG(GCC)D2	chrIV	+	992832	992902	23.8067	32.1407	19.7498	25.2324	3.64729	35.122	44.1441	21.8187	33.6949	6.48417
CLUST629	tW(CCA)K	chrXI	+	302918	303023	26.1874	28.7575	20.5727	25.1725	2.41661	28.0142	31.0651	23.2396	27.4397	2.27722
CLUST574	tV(AAC)J	chrX	+	378360	378433	23.8067	22.8368	27.9789	24.8742	1.57743	29.9779	26.9681	30.4374	29.1278	1.08796
CLUST191	tM(CAU)D	chrIV	+	1175829	1175901	20.2357	28.7575	23.8644	24.2859	2.46905	15.8795	32.4694	38.1809	28.8433	6.68831
CLUST245	tQ(UUG)E1	chrV	+	250286	250357	17.855	19.4536	35.3851	24.2312	5.596	14.292	16.0841	32.2039	20.86	5.69548
CLUST370	YGR037C	chrVII	-	559731	559994	26.1874	22.8368	23.0415	24.0219	1.08434	24.295	12.7441	13.5533	16.8641	3.72275
CLUST688	tQ(UUG)L	chrXII	-	448650	448721	15.4743	29.6033	26.3331	23.8036	4.27028	23.4895	25.7145	26.1585	25.1208	0.825691
CLUST352	tR(UCU)G1	chrVII	+	405470	405541	26.1874	24.5285	20.5727	23.7629	1.66539	61.7875	21.1352	19.3389	34.0872	13.8599
CLUST427	tR(UCU)G3	chrVII	+	736340	736411	26.1874	24.5285	20.5727	23.7629	1.66539	27.4	40.54	22.6498	30.1966	5.3504
CLUST790	tD(GUC)M	chrXIII	+	463554	463625	26.1874	24.5285	20.5727	23.7629	1.66539	22.9371	34.1648	22.2507	26.4509	3.86206
CLUST1045	tI(AAU)P2	chrXVI	-	880296	880369	26.1874	21.1452	23.8644	23.7323	1.45704	29.3861	30.6974	24.4075	28.1637	1.91584
CLUST704	tL(CAA)L	chrXII	+	628383	628497	33.3294	19.4536	18.104	23.629	4.86581	39.3423	27.091	20.94	29.1244	5.40872
CLUST548	tE(UUC)J	chrX	-	115939	116010	17.855	27.9117	24.6873	23.4847	2.96473	20.0016	33.9538	31.3863	28.4472	4.28736
CLUST713	tV(AAC)L	chrXII	-	687859	687932	24.997	21.991	23.0415	23.3432	0.880769	29.2297	34.0049	24.0809	29.1052	2.86548
CLUST935	tD(GUC)O	chrXV	+	571958	572029	24.997	24.5285	19.7498	23.0918	1.67643	34.1779	25.7687	26.9224	28.9563	2.63196
CLUST268	tI(AAU)E1	chrV	-	443202	443275	21.426	31.2949	16.4582	23.0597	4.3602	26.0319	21.6276	10.9484	19.5359	4.47807
CLUST770	tE(UUC)M	chrXIII	+	290801	290872	19.0454	27.0659	23.0415	23.0509	2.31533	21.6085	25.8316	16.0237	21.1546	2.84036
CLUST145	tR(ACG)D	chrIV	-	619969	620041	23.8067	21.991	23.0415	22.9464	0.526286	25.186	20.047	24.7588	23.3306	1.64644
CLUST575	YJL028W	chrX	+	391311	391646	15.4743	23.6827	29.6248	22.9273	4.10229	12.9402	17.9362	28.2159	19.6974	4.49679
CLUST588	tM(CAU)J3	chrX	-	517813	517884	27.3777	16.9162	23.8644	22.7194	3.07376	43.248	18.3785	23.6125	28.413	7.5698
CLUST283	tI(AAU)E2	chrV	-	551285	551358	22.6164	27.0659	18.104	22.5954	2.58709	28.6705	35.609	21.9765	28.752	3.93559
CLUST532	tT(AGU)I2	chrIX	+	325748	325820	14.284	27.0659	26.3331	22.561	4.1439	13.6747	33.9569	27.4691	25.0335	5.98027
CLUST581	tM(CAU)J2	chrX	+	422937	423009	24.997	21.1452	21.3957	22.5126	1.2443	21.8605	22.8391	17.3823	20.694	1.67976
CLUST263	tK(CUU)E2	chrV	-	435752	435824	19.0454	26.2201	21.3957	22.2204	2.11181	6.41226	26.0578	17.3725	16.6142	5.68384
CLUST965	tP(UGG)O3	chrXV	+	980683	980787	27.3777	16.9162	22.2186	22.1708	3.02007	19.205	21.7267	23.7757	21.5691	1.32179
CLUST130	tS(AGA)D1	chrIV	+	437772	437853	26.1874	18.6078	21.3957	22.0636	2.21337	27.7619	15.2114	23.9149	22.2961	3.71233
CLUST753	tR(UCU)M2	chrXIII	-	131825	131896	28.568	18.6078	18.9269	22.0343	3.26819	52.635	16.6082	15.8118	28.3517	12.1438
CLUST867	tP(UGG)N2	chrXIV	+	568115	568217	22.6164	20.2994	23.0415	21.9857	0.85205	20.1359	20.2468	23.9969	21.4599	1.26893
CLUST624	tA(AGC)K1	chrXI	+	219895	219967	16.6647	27.0659	22.2186	21.983	3.00488	18.3921	17.4298	18.2706	18.0308	0.30256
CLUST781	tV(AAC)M1	chrXIII	-	372445	372518	24.997	20.2994	20.5727	21.9564	1.52236	32.3588	25.7984	19.3536	25.837	3.75433
CLUST426	tN(GUU)G	chrVII	+	731137	731210	22.6164	24.5285	18.104	21.7496	1.90454	19.0484	19.0853	14.1492	17.4276	1.63926
CLUST610	tL(UAA)K	chrXI	+	84208	84291	19.0454	27.0659	18.104	21.4051	2.84342	15.5278	41.9926	22.2071	26.5759	7.94586
CLUST250	YER065C	chrV	-	285241	286914	23.8067	17.762	21.3957	20.9881	1.75681	31.0457	18.2031	26.8244	25.3577	3.77917
CLUST719	tI(AAU)L1	chrXII	+	734802	734875	17.855	21.991	23.0415	20.9625	1.58306	7.10062	18.2357	15.9164	13.7509	3.39187
CLUST262	tH(GUG)E2	chrV	-	434541	434612	20.2357	25.3743	16.4582	20.6894	2.58383	13.3577	34.6836	15.9793	21.3402	6.71447
CLUST708	tA(AGC)L	chrXII	-	656934	657006	11.9033	24.5285	22.2186	19.5501	3.8811	13.5553	37.5068	30.6682	27.2434	7.12311
CLUST127	tA(AGC)D	chrIV	+	410379	410451	24.997	21.1452	12.3436	19.4953	3.74472	39.1702	21.8317	9.98413	23.662	8.47486
CLUST434	tA(UGC)G	chrVII	+	794417	794489	19.0454	21.991	17.2811	19.4392	1.37382	13.9882	15.6937	18.8883	16.1901	1.43615
CLUST323	tK(UUU)G1	chrVII	+	115488	115583	21.426	16.0704	19.7498	19.0821	1.58168	14.3498	14.2125	19.6728	16.0784	1.79765
CLUST816	tR(UCU)M1	chrXIII	-	747892	747963	16.6647	18.6078	21.3957	18.8894	1.37295	19.816	23.4849	14.9531	19.418	2.47095
CLUST129	tT(AGU)D	chrIV	-	434264	434336	14.284	21.991	19.7498	18.675	2.28882	17.4137	26.5058	24.0361	22.6519	2.7144
CLUST194	tK(CUU)D1	chrIV	+	1201750	1201822	13.0937	21.1452	20.5727	18.2705	2.59371	8.46531	21.8384	24.0535	18.1191	4.86906
CLUST694	RDN5-6	chrXII	+	489350	489470	15.4743	19.4536	19.7498	18.2259	1.37845	20.0866	17.8256	22.9051	20.2724	1.46929
CLUST577	tG(GCC)J1	chrX	-	396726	396796	17.855	10.9955	25.5102	18.1202	4.19213	6.63532	3.95332	12.1694	7.58602	2.41896
CLUST381	tC(GCA)G	chrVII	-	707108	707179	16.6647	16.0704	21.3957	18.0436	1.6848	17.5482	10.9014	13.8047	14.0848	1.92389
CLUST206	tK(CUU)D2	chrIV	-	1352466	1352538	15.4743	21.991	16.4582	17.9745	2.02824	13.6197	18.6211	16.5393	16.26	1.45051
CLUST567	tR(UCU)J1	chrX	+	355374	355445	15.4743	12.6871	25.5102	17.8906	3.89386	26.3549	17.7857	34.8304	26.3237	4.9204
CLUST639	tL(CAA)K	chrXI	+	458557	458670	14.284	23.6827	15.6353	17.8673	2.93372	8.64427	21.7205	9.66667	13.3438	4.19873
CLUST298	tN(GUU)F	chrVI	-	137486	137559	16.6647	17.762	18.9269	17.7845	0.653151	4.59115	24.375	22.7749	17.247	6.34478
CLUST341	tE(UUC)G1	chrVII	+	328583	328654	15.4743	21.1452	14.8124	17.144	2.00973	14.3032	17.9822	15.0708	15.7854	1.12054
CLUST636	tV(AAC)K2	chrXI	+	379680	379753	26.1874	11.8413	13.1666	17.0651	4.57715	23.9356	17.3102	12.4924	17.9128	3.31706
CLUST1040	tA(AGC)P	chrXVI	+	856902	856974	17.855	12.6871	20.5727	17.0383	2.31272	18.882	14.3643	18.4418	17.2294	1.43815
CLUST523	tI(AAU)I2	chrIX	+	210665	210738	16.6647	15.2246	18.104	16.6644	0.831227	17.881	11.7488	22.1744	17.2681	3.02518
CLUST857	tL(CAA)N	chrXIV	+	443006	443119	14.284	16.9162	18.104	16.4347	1.12871	23.8803	17.937	21.774	21.1971	1.73977
CLUST870	tI(AAU)N2	chrXIV	+	602312	602385	21.426	14.3788	13.1666	16.3238	2.57501	27.3894	15.1059	16.3416	19.6123	3.90489
CLUST469	tH(GUG)H	chrVIII	+	62755	62826	13.0937	16.9162	18.9269	16.3123	1.71077	18.4164	12.3124	15.7933	15.5074	1.76786
CLUST869	tI(AAU)N1	chrXIV	-	569867	569940	11.9033	17.762	17.2811	15.6488	1.87787	26.0362	22.7633	19.3657	22.7217	1.92573
CLUST147	tQ(UUG)D2	chrIV	-	645153	645224	17.855	15.2246	13.1666	15.4154	1.3568	18.9147	18.3084	6.18876	14.4706	4.14462
CLUST239	tE(UUC)E1	chrV	+	177099	177170	14.284	13.5329	17.2811	15.0327	1.14493	11.9034	13.5363	15.0132	13.4843	0.898105
CLUST802	tV(AAC)M3	chrXIII	-	586636	586709	15.4743	14.3788	14.8124	14.8885	0.318553	21.1386	13.7729	8.70358	14.5384	3.61004
CLUST1012	tK(CUU)P	chrXVI	+	582062	582134	16.6647	13.5329	13.9895	14.729	0.976757	20.1854	16.3227	14.7847	17.0976	1.60649
CLUST684	tD(GUC)L1	chrXII	+	427132	427203	11.9033	16.9162	14.8124	14.544	1.45329	6.42257	15.9648	10.464	10.9505	2.76533
CLUST304	tY(GUA)F1	chrVI	+	167437	167525	15.4743	16.0704	10.6978	14.0808	1.70024	8.45586	7.78537	6.3865	7.54258	0.609583
CLUST937	tG(CCC)O	chrXV	-	594354	594425	13.0937	12.6871	15.6353	13.8054	0.922456	5.87738	14.883	23.226	14.6622	5.00935
CLUST101	tT(AGU)C	chrIII	+	295484	295556	10.713	10.1497	19.7498	13.5375	3.11041	12.1903	20.9323	31.7223	21.615	5.64873
CLUST865	tP(UGG)N1	chrXIV	+	547094	547196	9.52268	16.9162	13.9895	13.4761	2.1497	22.3427	22.0702	19.8633	21.4254	0.785019
CLUST428	tI(AAU)G	chrVII	+	739122	739195	9.52268	15.2246	13.9895	12.9122	1.73188	15.7692	23.12	14.6533	17.8475	2.65587
CLUST662	tP(UGG)L	chrXII	+	92548	92650	9.52268	12.6871	16.4582	12.8893	2.00466	7.07829	13.4956	12.9447	11.1729	2.05345
CLUST096	tS(CGA)C	chrIII	+	227942	228042	10.713	15.2246	11.5207	12.4861	1.38894	4.28105	17.0567	9.54466	10.2941	3.70702
CLUST167	tI(UAU)D	chrIV	+	884361	884493	9.52268	12.6871	14.8124	12.3407	1.5368	4.72516	9.02857	16.8015	10.1851	3.53377
CLUST631	tH(GUG)K	chrXI	-	313401	313472	11.9033	10.1497	11.5207	11.1913	0.532361	9.436	10.6468	11.5007	10.5278	0.598981
CLUST402	tC(GCA)G	chrVII	-	707108	707179	8.33234	10.9955	13.1666	10.8315	1.39793	22.6786	21.8662	15.4622	20.0023	2.28213
CLUST044	tQ(UUG)B	chrII	+	350827	350898	7.14201	11.8413	13.1666	10.7166	1.8278	4.03537	9.42519	9.57105	7.6772	1.8214
CLUST614	tE(UUC)K	chrXI	-	141018	141089	11.9033	7.61228	12.3436	10.6198	1.5091	9.96458	6.10793	16.5617	10.8781	3.0521
CLUST459	tT(UGU)G2	chrVII	+	1004216	1004287	7.14201	12.6871	10.6978	10.1757	1.62189	7.53929	9.38225	8.38726	8.43627	0.53258
CLUST329	tK(CUU)G2	chrVII	-	185714	185786	11.9033	10.9955	7.40619	10.1017	1.37299	14.6694	6.46947	5.62727	8.92205	2.88394
CLUST644	tD(GUC)K	chrXI	-	513332	513403	7.14201	13.5329	9.05201	9.90899	1.89401	2.84849	11.4086	11.1947	8.48392	2.81839
CLUST579	tK(CUU)J	chrX	+	414966	415038	8.33234	9.3039	9.87492	9.17039	0.450279	10.3148	5.77784	9.72557	8.60606	1.4243
CLUST276	tE(UUC)E3	chrV	-	487331	487402	11.9033	10.9955	4.11455	9.00447	2.45897	18.5822	11.9571	6.69516	12.4115	3.43901
CLUST734	tK(UUU)L	chrXII	+	875376	875471	11.9033	5.07485	9.05201	8.67674	1.98013	7.02445	3.89774	12.2691	7.73042	2.44224
CLUST746	tI(AAU)L2	chrXII	-	1052071	1052144	10.713	9.3039	5.76037	8.59243	1.4733	4.37296	15.5008	8.71696	9.53026	3.23798
CLUST894	tT(AGU)O1	chrXV	+	113802	113874	5.95167	10.1497	9.05201	8.38446	1.25699	5.07105	7.35338	6.48862	6.30435	0.665262
CLUST367	tE(UUC)G3	chrVII	+	541850	541921	9.52268	8.45809	4.93746	7.63941	1.38549	3.29404	9.82771	5.13559	6.08578	1.94502
CLUST173	tS(AGA)D2	chrIV	-	980974	981055	9.52268	6.76647	6.58328	7.62414	0.950739	9.52161	6.70132	5.56225	7.26173	1.17681
CLUST675	snR6	chrXII	+	366236	366347	7.14201	5.92066	4.93746	6.00004	0.637635	1.58288	9.4367	3.3821	4.80056	2.37555
CLUST439	tR(UCU)G2	chrVII	-	828723	828794	8.33234	4.22905	4.93746	5.83295	1.26632	6.90505	1.51435	2.19507	3.53816	1.69488
CLUST139	tQ(UUG)D1	chrIV	+	520972	521043	2.38067	10.1497	4.11455	5.54831	2.35452	0.207309	8.16908	4.41671	4.26437	2.29963
CLUST533	tD(GUC)I2	chrIX	-	336349	336420	7.14201	3.38324	5.76037	5.42854	1.09768	10.2555	0.885875	4.99331	5.37823	2.71162
CLUST922	tT(AGU)O2	chrXV	-	354041	354113	5.95167	6.76647	2.46873	5.06229	1.31794	0.690935	7.35366	1.3429	3.12916	2.12062
CLUST050	tD(GUC)B	chrII	+	405960	406031	5.95167	2.53743	4.93746	4.47552	1.01231	8.88479	5.16339	12.5808	8.87633	2.14123
CLUST213	tL(CAA)D	chrIV	-	1461715	1461829	3.571	0.845809	5.76037	3.39239	1.42152	0.769964	0.462586	6.47963	2.57073	1.95647
CLUST981	tE(UUC)P	chrXVI	-	210192	210263	0	0.845809	7.40619	2.75067	2.34053	0	0.759281	7.60279	2.78736	2.41767
CLUST395	tC(GCA)G	chrVII	-	707108	707179	2.38067	3.38324	2.46873	2.74421	0.320522	0.208741	1.04306	3.15567	1.46916	0.876977
CLUST518	YIL082W-A	chrIX	+	205635	210132	3.571	2.53743	1.64582	2.58475	0.556256	0.657433	4.34067	3.77529	2.92447	1.14521
CLUST144	tD(GUC)D	chrIV	+	568964	569035	1.19033	3.38324	1.64582	2.07313	0.668119	0.0950643	2.52149	4.13272	2.24976	1.17346
CLUST568	tD(GUC)J2	chrX	+	355456	355527	2.38067	1.69162	1.64582	1.90604	0.237685	4.26816	1.29822	0.895391	2.15392	1.0635
CLUST423	YGR110W	chrVII	+	713709	715046	1.19033	1.69162	0.82291	1.23495	0.251765	0.0758797	1.20615	1.15012	0.810717	0.367775
CLUST369	iYGR033C	chrVII	+	555228	555229	0	1.69162	1.64582	1.11248	0.556397	0	0.466235	0.0818512	0.182695	0.143725
CLUST414	YGR110W	chrVII	+	713709	715046	2.38067	0	0.82291	1.06786	0.698068	1.51129	0	0.37445	0.628581	0.4544
CLUST522	tI(AAU)I2	chrIX	+	210665	210738	1.19033	1.69162	0	0.960651	0.50165	0.244533	1.98031	0	0.741613	0.623357
CLUST924	YOR069W	chrXV	+	453768	455795	1.19033	0.845809	0.82291	0.953018	0.118842	0.0294929	0.0760685	0.0252438	0.0436017	0.0162797
CLUST179	YDR281C	chrIV	-	1022007	1022321	0	2.53743	0	0.845809	0.845809	0	0.118173	0	0.0393909	0.0393909
CLUST307	YFR018C	chrVI	-	183131	184222	2.38067	0	0	0.793556	0.793556	4.63868	0	0	1.54623	1.54623
CLUST514	YIL102C-A	chrIX	-	173365	173592	1.19033	0.845809	0	0.678715	0.353631	0.160063	0.0204908	0	0.0601846	0.0502884
CLUST862	YNL055C	chrXIV	-	517994	518845	1.19033	0.845809	0	0.678715	0.353631	0.21504	0.285187	0	0.166742	0.085795
CLUST961	tA(UGC)O	chrXV	-	854187	854259	1.19033	0.845809	0	0.678715	0.353631	2.67898	1.1778	0	1.28559	0.775231
CLUST385	tC(GCA)G	chrVII	-	707108	707179	1.19033	0	0.82291	0.671081	0.351906	0.245392	0	0.0378658	0.0944193	0.0762737
CLUST520	YIL083C	chrIX	-	203556	204653	1.19033	0	0.82291	0.671081	0.351906	0.0297792	0	0.271945	0.100575	0.0861153
CLUST747	YML126C	chrXIII	-	19060	20535	1.19033	0	0.82291	0.671081	0.351906	0.0157486	0	1.44789	0.487878	0.480026
CLUST863	tD(GUC)N	chrXIV	-	519099	519169	1.19033	0	0.82291	0.671081	0.351906	2.79438	0	1.54963	1.448	0.808266
CLUST033	tG(GCC)B	chrII	-	197629	197699	0	1.69162	0	0.563873	0.563873	0	0.539216	0	0.179739	0.179739
CLUST366	YGR027W-B	chrVII	+	536057	541325	0	1.69162	0	0.563873	0.563873	0	0.15326	0	0.0510866	0.0510866
CLUST424	YGR110W	chrVII	+	713709	715046	0	1.69162	0	0.563873	0.563873	0	1.28166	0	0.427219	0.427219
CLUST412	YGR110W	chrVII	+	713709	715046	0	0.845809	0.82291	0.55624	0.278198	0	0.0249819	0.213043	0.0793415	0.0672384
CLUST572	tD(GUC)J3	chrX	-	374424	374495	0	0.845809	0.82291	0.55624	0.278198	0	0.776404	1.70033	0.825576	0.491457
CLUST389	tC(GCA)G	chrVII	-	707108	707179	0	0	1.64582	0.548607	0.548607	0	0	1.28189	0.427297	0.427297
CLUST042	tL(UAA)B2	chrII	+	347603	347686	1.19033	0	0	0.396778	0.396778	3.30635	0	0	1.10212	1.10212
CLUST048	YBR080C	chrII	-	398614	400890	1.19033	0	0	0.396778	0.396778	4.01819	0	0	1.3394	1.3394
CLUST153	YDR133C	chrIV	-	720962	721297	1.19033	0	0	0.396778	0.396778	0.0226207	0	0	0.00754024	0.00754024
CLUST187	YDR333C	chrIV	-	1133260	1135431	1.19033	0	0	0.396778	0.396778	0.11024	0	0	0.0367468	0.0367468
CLUST195	YDR363W-A	chrIV	+	1202128	1202397	1.19033	0	0	0.396778	0.396778	0.0314972	0	0	0.0104991	0.0104991
CLUST242	YER044C	chrV	-	237570	238016	1.19033	0	0	0.396778	0.396778	0.0352196	0	0	0.0117399	0.0117399
CLUST256	YER100W	chrV	+	359562	360314	1.19033	0	0	0.396778	0.396778	0.306955	0	0	0.102318	0.102318
CLUST286	YFL064C	chrVI	-	3322	3846	1.19033	0	0	0.396778	0.396778	0.0229071	0	0	0.00763569	0.00763569
CLUST315	YFR033C	chrVI	-	224326	224769	1.19033	0	0	0.396778	0.396778	0.324135	0	0	0.108045	0.108045
CLUST335	YGL117W	chrVII	+	288512	289309	1.19033	0	0	0.396778	0.396778	1.69684	0	0	0.565614	0.565614
CLUST337	YGL112C	chrVII	-	298178	299728	1.19033	0	0	0.396778	0.396778	1.76442	0	0	0.588139	0.588139
CLUST348	YGL076C	chrVII	-	364335	365996	1.19033	0	0	0.396778	0.396778	0.0750207	0	0	0.0250069	0.0250069
CLUST360	YGL017W	chrVII	+	459854	461365	1.19033	0	0	0.396778	0.396778	0.602742	0	0	0.200914	0.200914
CLUST361	YGL012W	chrVII	+	472855	474276	1.19033	0	0	0.396778	0.396778	6.95974	0	0	2.31991	2.31991
CLUST371	YGR046W	chrVII	+	584895	586052	1.19033	0	0	0.396778	0.396778	0.759656	0	0	0.253219	0.253219
CLUST407	tC(GCA)G	chrVII	-	707108	707179	1.19033	0	0	0.396778	0.396778	0.120835	0	0	0.0402783	0.0402783
CLUST429	YGR124W	chrVII	+	739944	741662	1.19033	0	0	0.396778	0.396778	3.80486	0	0	1.26829	1.26829
CLUST443	YGR179C	chrVII	-	853675	854895	1.19033	0	0	0.396778	0.396778	0.135152	0	0	0.0450506	0.0450506
CLUST453	YGR212W	chrVII	+	917040	918446	1.19033	0	0	0.396778	0.396778	1.41766	0	0	0.472554	0.472554
CLUST620	tK(CUU)K	chrXI	+	202999	203071	1.19033	0	0	0.396778	0.396778	3.35045	0	0	1.11682	1.11682
CLUST681	YLR130C	chrXII	-	402794	404062	1.19033	0	0	0.396778	0.396778	0.464441	0	0	0.154814	0.154814
CLUST686	YLR152C	chrXII	-	442958	444688	1.19033	0	0	0.396778	0.396778	0.109668	0	0	0.0365559	0.0365559
CLUST727	YLR342W	chrXII	+	809997	815627	1.19033	0	0	0.396778	0.396778	0.258564	0	0	0.0861879	0.0861879
CLUST834	YNL317W	chrXIV	+	40619	42016	1.19033	0	0	0.396778	0.396778	0.0904829	0	0	0.030161	0.030161
CLUST959	YOR288C	chrXV	-	852121	853077	1.19033	0	0	0.396778	0.396778	0.112817	0	0	0.0376058	0.0376058
CLUST968	YOR372C	chrXV	-	1034807	1036471	1.19033	0	0	0.396778	0.396778	0.0953507	0	0	0.0317836	0.0317836
CLUST1016	YPR022C	chrXVI	-	603911	607312	1.19033	0	0	0.396778	0.396778	0.0927736	0	0	0.0309245	0.0309245
CLUST002	YAL062W	chrI	+	31567	32940	0	0.845809	0	0.281936	0.281936	0	0.213609	0	0.0712031	0.0712031
CLUST022	YBL046W	chrII	+	132424	133749	0	0.845809	0	0.281936	0.281936	0	0.348904	0	0.116301	0.116301
CLUST039	YBR036C	chrII	-	309081	310313	0	0.845809	0	0.281936	0.281936	0	1.51379	0	0.504597	0.504597
CLUST040	YBR037C	chrII	-	310565	311452	0	0.845809	0	0.281936	0.281936	0	0.979908	0	0.326636	0.326636
CLUST052	YBR083W	chrII	+	409169	410629	0	0.845809	0	0.281936	0.281936	0	2.69804	0	0.899348	0.899348
CLUST059	YBR129C	chrII	-	494353	495339	0	0.845809	0	0.281936	0.281936	0	1.47084	0	0.490281	0.490281
CLUST080	YCL033C	chrIII	-	62776	63282	0	0.845809	0	0.281936	0.281936	0	3.05341	0	1.0178	1.0178
CLUST081	YCL026C-B	chrIII	-	73405	73986	0	0.845809	0	0.281936	0.281936	0	0.547356	0	0.182452	0.182452
CLUST099	YCR081W	chrIII	+	254371	258654	0	0.845809	0	0.281936	0.281936	0	1.88852	0	0.629506	0.629506
CLUST141	YDR042C	chrIV	-	540601	541203	0	0.845809	0	0.281936	0.281936	0	0.376413	0	0.125471	0.125471
CLUST166	YDR208W	chrIV	+	868224	870563	0	0.845809	0	0.281936	0.281936	0	0.670301	0	0.223434	0.223434
CLUST169	tY(GUA)D	chrIV	+	946312	946400	0	0.845809	0	0.281936	0.281936	0	0.0721387	0	0.0240462	0.0240462
CLUST205	YDR430C	chrIV	-	1325501	1328470	0	0.845809	0	0.281936	0.281936	0	0.550444	0	0.183481	0.183481
CLUST209	YDR470C	chrIV	-	1399706	1401214	0	0.845809	0	0.281936	0.281936	0	5.60717	0	1.86906	1.86906
CLUST243	YER044C	chrV	-	237570	238016	0	0.845809	0	0.281936	0.281936	0	0.471007	0	0.157002	0.157002
CLUST322	tH(GUG)G1	chrVII	-	110625	110696	0	0.845809	0	0.281936	0.281936	0	0.813736	0	0.271245	0.271245
CLUST328	YGL178W	chrVII	+	167352	170571	0	0.845809	0	0.281936	0.281936	0	0.0446306	0	0.0148769	0.0148769
CLUST340	YGL097W	chrVII	+	321782	323230	0	0.845809	0	0.281936	0.281936	0	0.0317186	0	0.0105729	0.0105729
CLUST460	YGR258C	chrVII	-	1007671	1010766	0	0.845809	0	0.281936	0.281936	0	2.41174	0	0.803912	0.803912
CLUST466	YGR294W	chrVII	+	1080306	1080668	0	0.845809	0	0.281936	0.281936	0	0.211083	0	0.070361	0.070361
CLUST499	YHR204W	chrVIII	+	506319	508709	0	0.845809	0	0.281936	0.281936	0	1.90003	0	0.633343	0.633343
CLUST509	YIL125W	chrIX	+	122689	125733	0	0.845809	0	0.281936	0.281936	0	0.0317186	0	0.0105729	0.0105729
CLUST648	YKR043C	chrXI	-	520897	521712	0	0.845809	0	0.281936	0.281936	0	2.37861	0	0.792871	0.792871
CLUST664	YLR010C	chrXII	-	167320	167802	0	0.845809	0	0.281936	0.281936	0	0.119857	0	0.0399523	0.0399523
CLUST674	YLR096W	chrXII	+	332590	336033	0	0.845809	0	0.281936	0.281936	0	1.04419	0	0.348062	0.348062
CLUST679	YLR121C	chrXII	-	388744	390270	0	0.845809	0	0.281936	0.281936	0	0.276766	0	0.0922552	0.0922552
CLUST699	YLR219W	chrXII	+	574151	576337	0	0.845809	0	0.281936	0.281936	0	0.601811	0	0.200604	0.200604
CLUST702	YLR237W	chrXII	+	612367	614163	0	0.845809	0	0.281936	0.281936	0	0.742159	0	0.247386	0.247386
CLUST712	YLR264C-A	chrXII	-	673828	673944	0	0.845809	0	0.281936	0.281936	0	0.326168	0	0.108723	0.108723
CLUST714	YLR273C	chrXII	-	689083	691029	0	0.845809	0	0.281936	0.281936	0	0.297537	0	0.0991791	0.0991791
CLUST729	YLR347C	chrXII	-	823828	826413	0	0.845809	0	0.281936	0.281936	0	0.655705	0	0.218568	0.218568
CLUST744	YLR454W	chrXII	+	1043998	1051884	0	0.845809	0	0.281936	0.281936	0	0.595074	0	0.198358	0.198358
CLUST784	YMR071C	chrXIII	-	410762	411265	0	0.845809	0	0.281936	0.281936	0	2.25146	0	0.750486	0.750486
CLUST809	YMR202W	chrXIII	+	667537	668205	0	0.845809	0	0.281936	0.281936	0	0.025824	0	0.00860799	0.00860799
CLUST828	YMR299C	chrXIII	-	864412	865350	0	0.845809	0	0.281936	0.281936	0	0.071858	0	0.0239527	0.0239527
CLUST842	YNL264C	chrXIV	-	145563	146615	0	0.845809	0	0.281936	0.281936	0	1.76838	0	0.58946	0.58946
CLUST875	tP(AGG)N	chrXIV	-	631846	631917	0	0.845809	0	0.281936	0.281936	0	1.1879	0	0.395968	0.395968
CLUST903	YOL064C	chrXV	-	206103	207176	0	0.845809	0	0.281936	0.281936	0	0.161681	0	0.0538935	0.0538935
CLUST906	tG(GCC)O1	chrXV	-	226611	226681	0	0.845809	0	0.281936	0.281936	0	0.306519	0	0.102173	0.102173
CLUST936	YOR134W	chrXV	+	578564	579793	0	0.845809	0	0.281936	0.281936	0	1.69119	0	0.56373	0.56373
CLUST952	YOR222W	chrXV	+	758330	759253	0	0.845809	0	0.281936	0.281936	0	0.0494024	0	0.0164675	0.0164675
CLUST996	YPL067C	chrXVI	-	425251	425847	0	0.845809	0	0.281936	0.281936	0	1.21092	0	0.40364	0.40364
CLUST1000	YPL056C	chrXVI	-	453430	453735	0	0.845809	0	0.281936	0.281936	0	0.693318	0	0.231106	0.231106
CLUST1032	tK(UUU)P	chrXVI	-	769207	769302	0	0.845809	0	0.281936	0.281936	0	0.0530514	0	0.0176838	0.0176838
CLUST073	YBR295W	chrII	+	792849	796499	0	0	0.82291	0.274303	0.274303	0	0	1.834	0.611334	0.611334
CLUST085	tP(AGG)C	chrIII	-	123577	123648	0	0	0.82291	0.274303	0.274303	0	0	1.56894	0.522981	0.522981
CLUST118	YDL086W	chrIV	+	301413	302234	0	0	0.82291	0.274303	0.274303	0	0	0.37904	0.126347	0.126347
CLUST137	YDR033W	chrIV	+	508147	509109	0	0	0.82291	0.274303	0.274303	0	0	0.0374833	0.0124944	0.0124944
CLUST172	YDR246W	chrIV	+	954288	954947	0	0	0.82291	0.274303	0.274303	0	0	0.0116657	0.00388857	0.00388857
CLUST190	tX(XXX)D	chrIV	-	1150842	1150941	0	0	0.82291	0.274303	0.274303	0	0	1.82406	0.608019	0.608019
CLUST196	YDR380W	chrIV	+	1234218	1236125	0	0	0.82291	0.274303	0.274303	0	0	0.188181	0.0627271	0.0627271
CLUST197	YDR385W	chrIV	+	1243230	1245758	0	0	0.82291	0.274303	0.274303	0	0	0.218015	0.0726716	0.0726716
CLUST202	YDR412W	chrIV	+	1294693	1295400	0	0	0.82291	0.274303	0.274303	0	0	0.0376745	0.0125582	0.0125582
CLUST221	YEL058W	chrV	+	43252	44925	0	0	0.82291	0.274303	0.274303	0	0	0.0371008	0.0123669	0.0123669
CLUST226	YEL030W	chrV	+	94644	96578	0	0	0.82291	0.274303	0.274303	0	0	0.0418818	0.0139606	0.0139606
CLUST259	YER110C	chrV	-	378762	382103	0	0	0.82291	0.274303	0.274303	0	0	0.0275387	0.00917958	0.00917958
CLUST278	YER160C	chrV	-	492856	498124	0	0	0.82291	0.274303	0.274303	0	0	0.145917	0.048639	0.048639
CLUST290	YFL036W	chrVI	+	58782	62837	0	0	0.82291	0.274303	0.274303	0	0	0.131956	0.0439855	0.0439855
CLUST291	YFL034W	chrVI	+	65477	68698	0	0	0.82291	0.274303	0.274303	0	0	2.35858	0.786192	0.786192
CLUST302	tF(GAA)F	chrVI	-	157916	158007	0	0	0.82291	0.274303	0.274303	0	0	0.100975	0.0336584	0.0336584
CLUST311	YFR023W	chrVI	+	199874	201709	0	0	0.82291	0.274303	0.274303	0	0	0.420922	0.140307	0.140307
CLUST333	YGL127C	chrVII	-	270392	270775	0	0	0.82291	0.274303	0.274303	0	0	0.087206	0.0290687	0.0290687
CLUST388	tC(GCA)G	chrVII	-	707108	707179	0	0	0.82291	0.274303	0.274303	0	0	0.248805	0.0829349	0.0829349
CLUST394	tC(GCA)G	chrVII	-	707108	707179	0	0	0.82291	0.274303	0.274303	0	0	0.113024	0.0376745	0.0376745
CLUST396	tC(GCA)G	chrVII	-	707108	707179	0	0	0.82291	0.274303	0.274303	0	0	1.77185	0.590616	0.590616
CLUST399	tC(GCA)G	chrVII	-	707108	707179	0	0	0.82291	0.274303	0.274303	0	0	3.03022	1.01007	1.01007
CLUST405	tC(GCA)G	chrVII	-	707108	707179	0	0	0.82291	0.274303	0.274303	0	0	4.13655	1.37885	1.37885
CLUST413	YGR110W	chrVII	+	713709	715046	0	0	0.82291	0.274303	0.274303	0	0	0.232167	0.0773889	0.0773889
CLUST418	YGR110W	chrVII	+	713709	715046	0	0	0.82291	0.274303	0.274303	0	0	0.0288774	0.00962581	0.00962581
CLUST456	YGR233C	chrVII	-	954674	958210	0	0	0.82291	0.274303	0.274303	0	0	2.99541	0.99847	0.99847
CLUST470	YHL018W	chrVIII	+	69708	70070	0	0	0.82291	0.274303	0.274303	0	0	1.8231	0.607701	0.607701
CLUST496	YHR181W	chrVIII	+	467228	467914	0	0	0.82291	0.274303	0.274303	0	0	0.465672	0.155224	0.155224
CLUST500	YHR207C	chrVIII	-	514905	516485	0	0	0.82291	0.274303	0.274303	0	0	5.88296	1.96099	1.96099
CLUST551	YJL154C	chrX	-	131101	133935	0	0	0.82291	0.274303	0.274303	0	0	0.0151081	0.00503602	0.00503602
CLUST589	YJR044C	chrX	-	518763	519185	0	0	0.82291	0.274303	0.274303	0	0	0.6594	0.2198	0.2198
CLUST602	YJR137C	chrX	-	678957	683285	0	0	0.82291	0.274303	0.274303	0	0	0.0229489	0.00764965	0.00764965
CLUST671	YLR053C	chrXII	-	248100	248426	0	0	0.82291	0.274303	0.274303	0	0	1.78925	0.596417	0.596417
CLUST689	tQ(UUG)L	chrXII	-	448650	448721	0	0	0.82291	0.274303	0.274303	0	0	0.48078	0.16026	0.16026
CLUST692	RDN5-2	chrXII	+	468814	468932	0	0	0.82291	0.274303	0.274303	0	0	0.048384	0.016128	0.016128
CLUST705	YLR249W	chrXII	+	636780	639914	0	0	0.82291	0.274303	0.274303	0	0	0.121821	0.0406069	0.0406069
CLUST720	YLR305C	chrXII	-	738161	743863	0	0	0.82291	0.274303	0.274303	0	0	1.41691	0.472302	0.472302
CLUST741	YLR430W	chrXII	+	993434	1000129	0	0	0.82291	0.274303	0.274303	0	0	0.427424	0.142475	0.142475
CLUST750	YML100W	chrXIII	+	70624	73920	0	0	0.82291	0.274303	0.274303	0	0	1.56569	0.521897	0.521897
CLUST785	YMR071C	chrXIII	-	410762	411265	0	0	0.82291	0.274303	0.274303	0	0	0.121438	0.0404794	0.0404794
CLUST793	YMR113W	chrXIII	+	494999	496282	0	0	0.82291	0.274303	0.274303	0	0	3.93689	1.3123	1.3123
CLUST808	YMR196W	chrXIII	+	655076	658342	0	0	0.82291	0.274303	0.274303	0	0	0.308472	0.102824	0.102824
CLUST821	YMR279C	chrXIII	-	824729	826351	0	0	0.82291	0.274303	0.274303	0	0	0.150889	0.0502964	0.0502964
CLUST858	YNL086W	chrXIV	+	466334	466642	0	0	0.82291	0.274303	0.274303	0	0	1.04475	0.34825	0.34825
CLUST883	tL(UAA)N	chrXIV	-	726134	726217	0	0	0.82291	0.274303	0.274303	0	0	0.0690381	0.0230127	0.0230127
CLUST887	YOL164W-A	chrXV	+	4130	4312	0	0	0.82291	0.274303	0.274303	0	0	1.92484	0.641614	0.641614
CLUST909	YOL049W	chrXV	+	238619	240094	0	0	0.82291	0.274303	0.274303	0	0	0.0328935	0.0109645	0.0109645
CLUST930	YOR086C	chrXV	-	483219	486779	0	0	0.82291	0.274303	0.274303	0	0	1.31631	0.438771	0.438771
CLUST953	YOR224C	chrXV	-	760825	761265	0	0	0.82291	0.274303	0.274303	0	0	0.211513	0.0705042	0.0705042
CLUST974	YPL244C	chrXVI	-	87014	88033	0	0	0.82291	0.274303	0.274303	0	0	0.952572	0.317524	0.317524
CLUST1003	YPL036W	chrXVI	+	482843	485686	0	0	0.82291	0.274303	0.274303	0	0	0.0338497	0.0112832	0.0112832
CLUST1034	YPR121W	chrXVI	+	778583	780301	0	0	0.82291	0.274303	0.274303	0	0	0.0141518	0.00471728	0.00471728
CLUST1049	YPR184W	chrXVI	+	902044	906654	0	0	0.82291	0.274303	0.274303	0	0	0.160451	0.0534838	0.0534838

## Sheet: Table S3
Supplemental Table S3. Tags per individual insertion sites and nearest gene
Chromosome	Start	Stop	Strand	Reads_BY4741-1	Reads_BY4741-2	Reads_BY4741-3	Tags_BY4741-1	Tags_BY4741-2	Tags_BY4741-3	Insertion	Cluster	Nearest Scer Gene ->	Chr	Start	Stop	Strand	Gene	Distance from Ty3	Position within Gene
chrI	31120	31121	-	0	761	0	0	1	0	SITE0005	CLUST002		chrI	31567	32940	+	YAL062W	-447	na
chrI	139133	139134	+	12058	0	0	1	0	0	SITE0014	CLUST007		chrI	139152	139254	+	tP(UGG)A	-19	na
chrI	139134	139135	+	129720	88735	106923	16	22	31	SITE0015	CLUST007		chrI	139152	139254	+	tP(UGG)A	-18	na
chrI	139135	139136	+	10084	4506	1483	2	5	4	SITE0016	CLUST007		chrI	139152	139254	+	tP(UGG)A	-17	na
chrI	139136	139137	+	63017	18959	19910	5	3	3	SITE0017	CLUST007		chrI	139152	139254	+	tP(UGG)A	-16	na
chrI	139136	139137	-	0	0	1036	0	0	1	SITE0019	CLUST007		chrI	139152	139254	+	tP(UGG)A	-16	na
chrI	139137	139138	-	66402	56463	113367	22	20	25	SITE0021	CLUST007		chrI	139152	139254	+	tP(UGG)A	-15	na
chrI	139138	139139	+	0	1865	0	0	1	0	SITE0022	CLUST007		chrI	139152	139254	+	tP(UGG)A	-14	na
chrI	139138	139139	-	36819	16807	12756	5	3	2	SITE0023	CLUST007		chrI	139152	139254	+	tP(UGG)A	-14	na
chrI	139139	139140	-	2492	10719	594	2	2	1	SITE0024	CLUST007		chrI	139152	139254	+	tP(UGG)A	-13	na
chrI	139141	139142	-	0	0	4538	0	0	1	SITE0025	CLUST007		chrI	139152	139254	+	tP(UGG)A	-11	na
chrI	166250	166251	+	241	0	8623	1	0	1	SITE0028	CLUST009		chrI	166267	166339	+	tA(UGC)A	-17	na
chrI	166252	166253	+	48448	97103	163916	18	28	29	SITE0030	CLUST009		chrI	166267	166339	+	tA(UGC)A	-15	na
chrI	166252	166253	-	0	0	4572	0	0	1	SITE0031	CLUST009		chrI	166267	166339	+	tA(UGC)A	-15	na
chrI	166253	166254	+	9415	29090	12438	8	9	8	SITE0032	CLUST009		chrI	166267	166339	+	tA(UGC)A	-14	na
chrI	166253	166254	-	74	0	6690	1	0	1	SITE0033	CLUST009		chrI	166267	166339	+	tA(UGC)A	-14	na
chrI	166254	166255	+	36655	34429	17932	7	10	6	SITE0034	CLUST009		chrI	166267	166339	+	tA(UGC)A	-13	na
chrI	166255	166256	+	397	243	0	1	1	0	SITE0035	CLUST009		chrI	166267	166339	+	tA(UGC)A	-12	na
chrI	166254	166255	-	194	4555	0	1	2	0	SITE0036	CLUST009		chrI	166267	166339	+	tA(UGC)A	-13	na
chrI	166255	166256	-	81517	94242	80463	16	26	18	SITE0037	CLUST009		chrI	166267	166339	+	tA(UGC)A	-12	na
chrI	166256	166257	-	35546	31610	70057	11	12	18	SITE0038	CLUST009		chrI	166267	166339	+	tA(UGC)A	-11	na
chrI	166257	166258	-	1703	15231	35304	3	7	10	SITE0039	CLUST009		chrI	166267	166339	+	tA(UGC)A	-10	na
chrI	166258	166259	-	141	0	1258	1	0	1	SITE0040	CLUST009		chrI	166267	166339	+	tA(UGC)A	-9	na
chrI	181115	181116	+	0	9816	0	0	1	0	SITE0044	CLUST010		chrI	181141	181254	+	tL(CAA)A	-26	na
chrI	181123	181124	+	0	87	3673	0	1	2	SITE0046	CLUST010		chrI	181141	181254	+	tL(CAA)A	-18	na
chrI	181125	181126	+	36442	59966	124812	13	15	13	SITE0048	CLUST010		chrI	181141	181254	+	tL(CAA)A	-16	na
chrI	181126	181127	+	1169	2858	31159	3	3	8	SITE0050	CLUST010		chrI	181141	181254	+	tL(CAA)A	-15	na
chrI	181127	181128	+	0	0	1733	0	0	1	SITE0051	CLUST010		chrI	181141	181254	+	tL(CAA)A	-14	na
chrI	181126	181127	-	0	440	0	0	1	0	SITE0052	CLUST010		chrI	181141	181254	+	tL(CAA)A	-15	na
chrI	181128	181129	+	28688	0	0	2	0	0	SITE0053	CLUST010		chrI	181141	181254	+	tL(CAA)A	-13	na
chrI	181128	181129	-	22220	30387	36777	6	16	8	SITE0055	CLUST010		chrI	181141	181254	+	tL(CAA)A	-13	na
chrI	181129	181130	-	30658	9248	22032	2	6	8	SITE0058	CLUST010		chrI	181141	181254	+	tL(CAA)A	-12	na
chrI	181131	181132	+	0	0	2200	0	0	1	SITE0059	CLUST010		chrI	181141	181254	+	tL(CAA)A	-10	na
chrI	181131	181132	-	0	0	8606	0	0	1	SITE0061	CLUST010		chrI	181141	181254	+	tL(CAA)A	-10	na
chrI	181132	181133	+	24716	0	0	1	0	0	SITE0062	CLUST010		chrI	181141	181254	+	tL(CAA)A	-9	na
chrI	181132	181133	-	0	1748	0	0	1	0	SITE0064	CLUST010		chrI	181141	181254	+	tL(CAA)A	-9	na
chrI	182614	182615	+	32235	103771	28720	11	13	9	SITE0071	CLUST011		chrI	182522	182603	-	tS(AGA)A	-11	na
chrI	182615	182616	+	12478	28050	26914	3	10	6	SITE0072	CLUST011		chrI	182522	182603	-	tS(AGA)A	-12	na
chrI	182616	182617	+	62063	44002	159384	16	13	21	SITE0074	CLUST011		chrI	182522	182603	-	tS(AGA)A	-13	na
chrI	182617	182618	-	76931	15478	50067	16	12	11	SITE0077	CLUST011		chrI	182522	182603	-	tS(AGA)A	-15	na
chrI	182618	182619	-	27788	968	33711	7	1	7	SITE0079	CLUST011		chrI	182522	182603	-	tS(AGA)A	-16	na
chrI	182619	182620	-	62360	76957	58635	18	25	17	SITE0080	CLUST011		chrI	182522	182603	-	tS(AGA)A	-17	na
chrI	182620	182621	-	0	62	137	0	1	1	SITE0081	CLUST011		chrI	182522	182603	-	tS(AGA)A	-18	na
chrII	9559	9560	+	159	0	8039	1	0	1	SITE0091	CLUST015		chrII	9583	9666	+	tL(UAA)B1	-24	na
chrII	9564	9565	+	0	1097	57	0	1	1	SITE0093	CLUST015		chrII	9583	9666	+	tL(UAA)B1	-19	na
chrII	9567	9568	+	26890	22713	46768	10	11	7	SITE0097	CLUST015		chrII	9583	9666	+	tL(UAA)B1	-16	na
chrII	9567	9568	-	0	2501	167	0	1	2	SITE0098	CLUST015		chrII	9583	9666	+	tL(UAA)B1	-16	na
chrII	9568	9569	+	0	0	7791	0	0	2	SITE0099	CLUST015		chrII	9583	9666	+	tL(UAA)B1	-15	na
chrII	9569	9570	+	6626	0	7058	1	0	1	SITE0100	CLUST015		chrII	9583	9666	+	tL(UAA)B1	-14	na
chrII	9569	9570	-	0	5776	0	0	1	0	SITE0102	CLUST015		chrII	9583	9666	+	tL(UAA)B1	-14	na
chrII	9571	9572	+	11702	9295	39718	2	2	5	SITE0103	CLUST015		chrII	9583	9666	+	tL(UAA)B1	-12	na
chrII	9570	9571	-	19549	33169	76865	5	8	12	SITE0104	CLUST015		chrII	9583	9666	+	tL(UAA)B1	-13	na
chrII	9573	9574	+	0	1803	0	0	1	0	SITE0106	CLUST015		chrII	9583	9666	+	tL(UAA)B1	-10	na
chrII	9572	9573	-	285	0	1159	1	0	1	SITE0107	CLUST015		chrII	9583	9666	+	tL(UAA)B1	-11	na
chrII	9574	9575	-	18380	11400	25936	3	3	6	SITE0109	CLUST015		chrII	9583	9666	+	tL(UAA)B1	-9	na
chrII	9576	9577	-	0	0	11527	0	0	1	SITE0111	CLUST015		chrII	9583	9666	+	tL(UAA)B1	-7	na
chrII	9577	9578	-	0	0	1057	0	0	1	SITE0112	CLUST015		chrII	9583	9666	+	tL(UAA)B1	-6	na
chrII	36380	36381	+	1422	13020	403	4	7	2	SITE0115	CLUST017		chrII	36398	36488	+	tF(GAA)B	-18	na
chrII	36381	36382	+	0	445	11925	0	1	2	SITE0116	CLUST017		chrII	36398	36488	+	tF(GAA)B	-17	na
chrII	36382	36383	+	7167	32116	44463	5	15	16	SITE0117	CLUST017		chrII	36398	36488	+	tF(GAA)B	-16	na
chrII	36382	36383	-	0	0	5549	0	0	1	SITE0119	CLUST017		chrII	36398	36488	+	tF(GAA)B	-16	na
chrII	36383	36384	+	86	551	1038	1	1	1	SITE0120	CLUST017		chrII	36398	36488	+	tF(GAA)B	-15	na
chrII	36383	36384	-	30534	55219	57072	3	10	7	SITE0121	CLUST017		chrII	36398	36488	+	tF(GAA)B	-15	na
chrII	36384	36385	-	435	2013	15250	1	1	2	SITE0123	CLUST017		chrII	36398	36488	+	tF(GAA)B	-14	na
chrII	36385	36386	-	62466	47656	142025	11	18	21	SITE0124	CLUST017		chrII	36398	36488	+	tF(GAA)B	-13	na
chrII	36386	36387	-	0	3468	0	0	1	0	SITE0126	CLUST017		chrII	36398	36488	+	tF(GAA)B	-12	na
chrII	132361	132362	+	0	1243	0	0	1	0	SITE0138	CLUST022		chrII	132424	133749	+	YBL046W	-63	na
chrII	197470	197471	+	0	0	478	0	0	1	SITE0157	CLUST031		chrII	197494	197567	+	tI(AAU)B	-24	na
chrII	197473	197474	+	4617	0	0	1	0	0	SITE0158	CLUST031		chrII	197494	197567	+	tI(AAU)B	-21	na
chrII	197476	197477	+	0	0	4097	0	0	1	SITE0159	CLUST031		chrII	197494	197567	+	tI(AAU)B	-18	na
chrII	197479	197480	+	54972	22855	31154	17	19	19	SITE0162	CLUST031		chrII	197494	197567	+	tI(AAU)B	-15	na
chrII	197480	197481	+	18134	10634	15778	10	6	10	SITE0163	CLUST031		chrII	197494	197567	+	tI(AAU)B	-14	na
chrII	197479	197480	-	0	2432	995	0	2	1	SITE0164	CLUST031		chrII	197494	197567	+	tI(AAU)B	-15	na
chrII	197480	197481	-	463	1386	0	1	1	0	SITE0165	CLUST031		chrII	197494	197567	+	tI(AAU)B	-14	na
chrII	197481	197482	-	0	0	4785	0	0	1	SITE0167	CLUST031		chrII	197494	197567	+	tI(AAU)B	-13	na
chrII	197482	197483	+	0	0	561	0	0	1	SITE0168	CLUST031		chrII	197494	197567	+	tI(AAU)B	-12	na
chrII	197482	197483	-	74646	53800	86778	24	29	30	SITE0169	CLUST031		chrII	197494	197567	+	tI(AAU)B	-12	na
chrII	197483	197484	-	24709	6201	37046	6	7	8	SITE0170	CLUST031		chrII	197494	197567	+	tI(AAU)B	-11	na
chrII	197488	197489	-	0	0	14101	0	0	1	SITE0173	CLUST031		chrII	197494	197567	+	tI(AAU)B	-6	na
chrII	197708	197709	+	51	37854	5309	1	3	3	SITE0179	CLUST032		chrII	197629	197699	-	tG(GCC)B	-9	na
chrII	197708	197709	-	0	2055	0	0	1	0	SITE0180	CLUST032		chrII	197629	197699	-	tG(GCC)B	-10	na
chrII	197709	197710	+	8752	30640	34867	6	7	7	SITE0181	CLUST032		chrII	197629	197699	-	tG(GCC)B	-10	na
chrII	197710	197711	+	15870	11518	2072	5	3	2	SITE0182	CLUST032		chrII	197629	197699	-	tG(GCC)B	-11	na
chrII	197709	197710	-	0	0	227	0	0	1	SITE0183	CLUST032		chrII	197629	197699	-	tG(GCC)B	-11	na
chrII	197711	197712	+	0	0	1153	0	0	1	SITE0185	CLUST032		chrII	197629	197699	-	tG(GCC)B	-12	na
chrII	197712	197713	+	1376	2873	242	3	4	1	SITE0186	CLUST032		chrII	197629	197699	-	tG(GCC)B	-13	na
chrII	197711	197712	-	16411	5445	4086	3	3	5	SITE0187	CLUST032		chrII	197629	197699	-	tG(GCC)B	-13	na
chrII	197712	197713	-	21591	26410	9945	4	9	7	SITE0188	CLUST032		chrII	197629	197699	-	tG(GCC)B	-14	na
chrII	197713	197714	-	2044	16971	7530	2	5	6	SITE0189	CLUST032		chrII	197629	197699	-	tG(GCC)B	-15	na
chrII	197714	197715	-	0	3987	0	0	1	0	SITE0190	CLUST032		chrII	197629	197699	-	tG(GCC)B	-16	na
chrII	197715	197716	-	7898	4267	9234	2	3	5	SITE0191	CLUST032		chrII	197629	197699	-	tG(GCC)B	-17	na
chrII	198055	198056	+	0	1921	0	0	2	0	SITE0201	CLUST033		chrII	197629	197699	-	tG(GCC)B	-356	na
chrII	227059	227060	+	23792	103639	98208	12	19	17	SITE0207	CLUST034		chrII	227075	227156	+	tS(AGA)B	-16	na
chrII	227060	227061	+	0	8104	0	0	2	0	SITE0208	CLUST034		chrII	227075	227156	+	tS(AGA)B	-15	na
chrII	227061	227062	+	0	2578	0	0	1	0	SITE0209	CLUST034		chrII	227075	227156	+	tS(AGA)B	-14	na
chrII	227063	227064	+	993	1999	0	1	1	0	SITE0211	CLUST034		chrII	227075	227156	+	tS(AGA)B	-12	na
chrII	227062	227063	-	24325	66592	145424	11	19	22	SITE0212	CLUST034		chrII	227075	227156	+	tS(AGA)B	-13	na
chrII	227063	227064	-	6510	210	37724	1	2	8	SITE0213	CLUST034		chrII	227075	227156	+	tS(AGA)B	-12	na
chrII	266361	266362	+	1658	11027	7366	2	6	4	SITE0221	CLUST038		chrII	266378	266450	+	tT(AGU)B	-17	na
chrII	266363	266364	+	21447	21583	101291	7	12	22	SITE0223	CLUST038		chrII	266378	266450	+	tT(AGU)B	-15	na
chrII	266364	266365	+	307	695	0	1	1	0	SITE0225	CLUST038		chrII	266378	266450	+	tT(AGU)B	-14	na
chrII	266364	266365	-	24524	8056	47973	6	4	9	SITE0226	CLUST038		chrII	266378	266450	+	tT(AGU)B	-14	na
chrII	266365	266366	-	0	1355	0	0	1	0	SITE0228	CLUST038		chrII	266378	266450	+	tT(AGU)B	-13	na
chrII	266366	266367	-	6417	76358	123619	9	18	30	SITE0229	CLUST038		chrII	266378	266450	+	tT(AGU)B	-12	na
chrII	266367	266368	-	1393	0	0	1	0	0	SITE0230	CLUST038		chrII	266378	266450	+	tT(AGU)B	-11	na
chrII	310516	310517	-	0	5393	0	0	1	0	SITE0235	CLUST039		chrII	310565	311452	-	YBR037C	935	na
chrII	313223	313224	+	0	3491	0	0	1	0	SITE0237	CLUST040		chrII	311898	314789	+	YBR038W	0	1325
chrII	326864	326865	+	0	2548	0	0	1	0	SITE0240	CLUST041		chrII	326792	326865	-	tV(UAC)B	0	1
chrII	326871	326872	-	243	0	0	1	0	0	SITE0241	CLUST041		chrII	326792	326865	-	tV(UAC)B	-7	na
chrII	326874	326875	+	611	0	31137	2	0	4	SITE0244	CLUST041		chrII	326792	326865	-	tV(UAC)B	-9	na
chrII	326875	326876	+	5357	0	0	1	0	0	SITE0245	CLUST041		chrII	326792	326865	-	tV(UAC)B	-10	na
chrII	326876	326877	+	77022	228225	328951	23	55	52	SITE0246	CLUST041		chrII	326792	326865	-	tV(UAC)B	-11	na
chrII	326877	326878	-	6071	638	2201	1	1	3	SITE0248	CLUST041		chrII	326792	326865	-	tV(UAC)B	-13	na
chrII	326878	326879	+	0	76	0	0	1	0	SITE0249	CLUST041		chrII	326792	326865	-	tV(UAC)B	-13	na
chrII	326878	326879	-	415	668	1469	1	1	1	SITE0250	CLUST041		chrII	326792	326865	-	tV(UAC)B	-14	na
chrII	326879	326880	+	186	0	0	1	0	0	SITE0251	CLUST041		chrII	326792	326865	-	tV(UAC)B	-14	na
chrII	326879	326880	-	218694	116536	254325	32	33	45	SITE0252	CLUST041		chrII	326792	326865	-	tV(UAC)B	-15	na
chrII	326880	326881	+	104	0	0	1	0	0	SITE0253	CLUST041		chrII	326792	326865	-	tV(UAC)B	-15	na
chrII	326882	326883	-	183	0	0	1	0	0	SITE0258	CLUST041		chrII	326792	326865	-	tV(UAC)B	-18	na
chrII	344874	344875	+	11547	0	0	1	0	0	SITE0261	CLUST042		chrII	344602	347301	-	YBR055C	0	2427
chrII	347583	347584	+	0	3343	0	0	1	0	SITE0263	CLUST043		chrII	347603	347686	+	tL(UAA)B2	-20	na
chrII	347585	347586	+	0	5348	3996	0	1	1	SITE0265	CLUST043		chrII	347603	347686	+	tL(UAA)B2	-18	na
chrII	347586	347587	+	123849	82106	87388	16	24	19	SITE0266	CLUST043		chrII	347603	347686	+	tL(UAA)B2	-17	na
chrII	347587	347588	+	0	9567	0	0	1	0	SITE0267	CLUST043		chrII	347603	347686	+	tL(UAA)B2	-16	na
chrII	347588	347589	+	0	1217	61	0	1	1	SITE0268	CLUST043		chrII	347603	347686	+	tL(UAA)B2	-15	na
chrII	347589	347590	-	27025	16894	45897	14	18	19	SITE0271	CLUST043		chrII	347603	347686	+	tL(UAA)B2	-14	na
chrII	347590	347591	-	4007	60	5848	1	1	1	SITE0272	CLUST043		chrII	347603	347686	+	tL(UAA)B2	-13	na
chrII	347591	347592	-	0	2591	1181	0	3	2	SITE0274	CLUST043		chrII	347603	347686	+	tL(UAA)B2	-12	na
chrII	350810	350811	+	0	2699	0	0	1	0	SITE0276	CLUST044		chrII	350827	350898	+	tQ(UUG)B	-17	na
chrII	350811	350812	+	68	15653	30647	1	7	7	SITE0277	CLUST044		chrII	350827	350898	+	tQ(UUG)B	-16	na
chrII	350813	350814	-	8521	0	2607	1	0	1	SITE0282	CLUST044		chrII	350827	350898	+	tQ(UUG)B	-14	na
chrII	350814	350815	+	0	0	56	0	0	1	SITE0283	CLUST044		chrII	350827	350898	+	tQ(UUG)B	-13	na
chrII	350814	350815	-	1256	6712	14153	3	3	5	SITE0284	CLUST044		chrII	350827	350898	+	tQ(UUG)B	-13	na
chrII	350815	350816	-	4248	3917	497	1	1	1	SITE0286	CLUST044		chrII	350827	350898	+	tQ(UUG)B	-12	na
chrII	350816	350817	-	0	1756	2087	0	1	1	SITE0287	CLUST044		chrII	350827	350898	+	tQ(UUG)B	-11	na
chrII	350819	350820	-	0	2841	0	0	1	0	SITE0288	CLUST044		chrII	350827	350898	+	tQ(UUG)B	-8	na
chrII	401296	401297	+	14033	0	0	1	0	0	SITE0296	CLUST048		chrII	401253	405251	-	YBR081C	0	3955
chrII	405861	405862	+	0	0	71	0	0	1	SITE0298	CLUST049		chrII	405878	405949	+	tR(UCU)B	-17	na
chrII	405862	405863	+	30081	19990	60494	4	8	14	SITE0299	CLUST049		chrII	405878	405949	+	tR(UCU)B	-16	na
chrII	405864	405865	+	23428	0	0	1	0	0	SITE0302	CLUST049		chrII	405878	405949	+	tR(UCU)B	-14	na
chrII	405865	405866	-	99763	51795	92467	25	20	21	SITE0304	CLUST049		chrII	405878	405949	+	tR(UCU)B	-13	na
chrII	405944	405945	+	10906	5779	10165	3	1	3	SITE0310	CLUST050		chrII	405878	405949	+	tR(UCU)B	0	66
chrII	405945	405946	+	8689	0	0	1	0	0	SITE0311	CLUST050		chrII	405878	405949	+	tR(UCU)B	0	67
chrII	405947	405948	-	11434	12616	43388	1	2	2	SITE0314	CLUST050		chrII	405878	405949	+	tR(UCU)B	0	70
chrII	405948	405949	-	0	0	12232	0	0	1	SITE0315	CLUST050		chrII	405878	405949	+	tR(UCU)B	0	71
chrII	408984	408985	+	0	9612	0	0	1	0	SITE0318	CLUST052		chrII	409169	410629	+	YBR083W	-185	na
chrII	496238	496239	+	0	5240	0	0	1	0	SITE0330	CLUST059		chrII	495592	496869	-	YBR130C	0	631
chrII	643087	643088	+	2901	0	0	2	0	0	SITE0345	CLUST067		chrII	643007	643078	-	tC(GCA)B	-9	na
chrII	643088	643089	+	762	4000	18775	1	1	2	SITE0346	CLUST067		chrII	643007	643078	-	tC(GCA)B	-10	na
chrII	643089	643090	+	0	2759	22641	0	2	4	SITE0347	CLUST067		chrII	643007	643078	-	tC(GCA)B	-11	na
chrII	643088	643089	-	0	1299	0	0	1	0	SITE0348	CLUST067		chrII	643007	643078	-	tC(GCA)B	-11	na
chrII	643090	643091	+	15488	77041	100631	9	22	19	SITE0349	CLUST067		chrII	643007	643078	-	tC(GCA)B	-12	na
chrII	643090	643091	-	0	1469	0	0	1	0	SITE0351	CLUST067		chrII	643007	643078	-	tC(GCA)B	-13	na
chrII	643091	643092	+	470	0	0	1	0	0	SITE0352	CLUST067		chrII	643007	643078	-	tC(GCA)B	-13	na
chrII	643091	643092	-	1069	3136	6439	1	1	2	SITE0353	CLUST067		chrII	643007	643078	-	tC(GCA)B	-14	na
chrII	643092	643093	+	892	0	0	1	0	0	SITE0354	CLUST067		chrII	643007	643078	-	tC(GCA)B	-14	na
chrII	643092	643093	-	1358	7839	4023	3	3	2	SITE0355	CLUST067		chrII	643007	643078	-	tC(GCA)B	-15	na
chrII	643093	643094	-	60965	43182	98258	14	19	25	SITE0356	CLUST067		chrII	643007	643078	-	tC(GCA)B	-16	na
chrII	643094	643095	-	0	568	0	0	1	0	SITE0357	CLUST067		chrII	643007	643078	-	tC(GCA)B	-17	na
chrII	643095	643096	-	955	0	1847	2	0	1	SITE0358	CLUST067		chrII	643007	643078	-	tC(GCA)B	-18	na
chrII	645149	645150	+	0	0	814	0	0	1	SITE0360	CLUST068		chrII	645167	645238	+	tE(UUC)B	-18	na
chrII	645150	645151	+	75045	41041	88024	16	14	14	SITE0361	CLUST068		chrII	645167	645238	+	tE(UUC)B	-17	na
chrII	645151	645152	+	299	991	0	1	1	0	SITE0362	CLUST068		chrII	645167	645238	+	tE(UUC)B	-16	na
chrII	645152	645153	-	0	0	2066	0	0	1	SITE0363	CLUST068		chrII	645167	645238	+	tE(UUC)B	-15	na
chrII	645154	645155	+	0	0	12265	0	0	2	SITE0364	CLUST068		chrII	645167	645238	+	tE(UUC)B	-13	na
chrII	645153	645154	-	74144	52590	66590	13	17	22	SITE0365	CLUST068		chrII	645167	645238	+	tE(UUC)B	-14	na
chrII	645154	645155	-	418	0	0	1	0	0	SITE0366	CLUST068		chrII	645167	645238	+	tE(UUC)B	-13	na
chrII	645157	645158	-	0	1189	1458	0	1	1	SITE0369	CLUST068		chrII	645167	645238	+	tE(UUC)B	-10	na
chrII	791237	791238	-	0	0	9590	0	0	1	SITE0388	CLUST073		chrII	789235	791814	+	YBR294W	0	2003
chrIII	63699	63700	-	0	10878	0	0	1	0	SITE0405	CLUST080		chrIII	63441	64481	+	YCL032W	0	259
chrIII	74190	74191	-	0	1950	0	0	1	0	SITE0412	CLUST081		chrIII	73405	73986	-	YCL026C-B	-205	na
chrIII	82546	82547	+	8985	22478	40152	14	16	9	SITE0418	CLUST083		chrIII	82462	82533	-	tE(UUC)C	-13	na
chrIII	82549	82550	-	49989	25641	66950	8	14	26	SITE0421	CLUST083		chrIII	82462	82533	-	tE(UUC)C	-17	na
chrIII	82560	82561	-	1849	0	0	1	0	0	SITE0425	CLUST083		chrIII	82462	82533	-	tE(UUC)C	-28	na
chrIII	123653	123654	+	123	0	0	1	0	0	SITE0429	CLUST084		chrIII	123577	123648	-	tP(AGG)C	-5	na
chrIII	123656	123657	+	79508	21349	92255	12	12	17	SITE0431	CLUST084		chrIII	123577	123648	-	tP(AGG)C	-8	na
chrIII	123659	123660	-	70402	96020	86815	11	20	14	SITE0438	CLUST084		chrIII	123577	123648	-	tP(AGG)C	-12	na
chrIII	123660	123661	+	0	3941	0	0	2	0	SITE0439	CLUST084		chrIII	123577	123648	-	tP(AGG)C	-12	na
chrIII	123661	123662	+	0	0	516	0	0	1	SITE0441	CLUST084		chrIII	123577	123648	-	tP(AGG)C	-13	na
chrIII	123662	123663	+	0	1025	0	0	1	0	SITE0442	CLUST084		chrIII	123577	123648	-	tP(AGG)C	-14	na
chrIII	123663	123664	-	0	2741	17993	0	1	2	SITE0444	CLUST084		chrIII	123577	123648	-	tP(AGG)C	-16	na
chrIII	123666	123667	-	0	688	0	0	1	0	SITE0448	CLUST084		chrIII	123577	123648	-	tP(AGG)C	-19	na
chrIII	125498	125499	+	0	0	8204	0	0	1	SITE0451	CLUST085		chrIII	126011	126730	-	YCR007C	1232	na
chrIII	127697	127698	+	0	2312	2777	0	1	1	SITE0454	CLUST086		chrIII	127716	127789	+	tN(GUU)C	-19	na
chrIII	127698	127699	+	11772	51	3717	2	1	2	SITE0455	CLUST086		chrIII	127716	127789	+	tN(GUU)C	-18	na
chrIII	127699	127700	+	3345	26783	49609	9	10	21	SITE0456	CLUST086		chrIII	127716	127789	+	tN(GUU)C	-17	na
chrIII	127700	127701	-	0	607	734	0	1	1	SITE0459	CLUST086		chrIII	127716	127789	+	tN(GUU)C	-16	na
chrIII	127701	127702	-	21887	0	13265	2	0	5	SITE0461	CLUST086		chrIII	127716	127789	+	tN(GUU)C	-15	na
chrIII	127702	127703	-	41230	64615	131028	21	28	25	SITE0462	CLUST086		chrIII	127716	127789	+	tN(GUU)C	-14	na
chrIII	127704	127705	-	0	9688	0	0	3	0	SITE0464	CLUST086		chrIII	127716	127789	+	tN(GUU)C	-12	na
chrIII	142782	142783	+	0	4256	0	0	2	0	SITE0467	CLUST087		chrIII	142701	142771	-	tG(GCC)C	-11	na
chrIII	142784	142785	+	11599	59856	45544	12	17	17	SITE0469	CLUST087		chrIII	142701	142771	-	tG(GCC)C	-13	na
chrIII	142785	142786	+	697	4656	1455	1	1	1	SITE0470	CLUST087		chrIII	142701	142771	-	tG(GCC)C	-14	na
chrIII	142785	142786	-	2086	1037	0	1	1	0	SITE0472	CLUST087		chrIII	142701	142771	-	tG(GCC)C	-15	na
chrIII	142787	142788	+	0	0	347	0	0	1	SITE0474	CLUST087		chrIII	142701	142771	-	tG(GCC)C	-16	na
chrIII	142787	142788	-	11045	20275	25550	19	22	24	SITE0475	CLUST087		chrIII	142701	142771	-	tG(GCC)C	-17	na
chrIII	142788	142789	-	2426	5683	3382	3	4	2	SITE0476	CLUST087		chrIII	142701	142771	-	tG(GCC)C	-18	na
chrIII	168383	168384	+	6981	7859	15288	3	3	4	SITE0485	CLUST090		chrIII	168301	168372	-	tQ(UUG)C	-11	na
chrIII	168385	168386	+	57281	79622	116415	17	24	18	SITE0487	CLUST090		chrIII	168301	168372	-	tQ(UUG)C	-13	na
chrIII	168386	168387	-	5263	5122	6124	2	3	2	SITE0490	CLUST090		chrIII	168301	168372	-	tQ(UUG)C	-15	na
chrIII	168388	168389	-	46981	61305	114630	15	27	31	SITE0493	CLUST090		chrIII	168301	168372	-	tQ(UUG)C	-17	na
chrIII	227920	227921	+	107	0	0	1	0	0	SITE0501	CLUST096		chrIII	227942	228042	+	tS(CGA)C	-22	na
chrIII	227923	227924	-	0	0	6389	0	0	1	SITE0503	CLUST096		chrIII	227942	228042	+	tS(CGA)C	-19	na
chrIII	227925	227926	+	272	6874	18536	1	1	4	SITE0504	CLUST096		chrIII	227942	228042	+	tS(CGA)C	-17	na
chrIII	227926	227927	+	317	10952	1124	1	7	2	SITE0505	CLUST096		chrIII	227942	228042	+	tS(CGA)C	-16	na
chrIII	227927	227928	+	0	13134	6139	0	3	2	SITE0506	CLUST096		chrIII	227942	228042	+	tS(CGA)C	-15	na
chrIII	227928	227929	-	13484	6024	0	3	2	0	SITE0507	CLUST096		chrIII	227942	228042	+	tS(CGA)C	-14	na
chrIII	227929	227930	-	304	21368	11427	1	4	2	SITE0509	CLUST096		chrIII	227942	228042	+	tS(CGA)C	-13	na
chrIII	227930	227931	-	467	2414	6294	2	1	3	SITE0510	CLUST096		chrIII	227942	228042	+	tS(CGA)C	-12	na
chrIII	254243	254244	-	0	6728	0	0	1	0	SITE0520	CLUST099		chrIII	252845	254173	+	YCR079W	71	na
chrIII	295467	295468	+	0	0	7734	0	0	1	SITE0525	CLUST101		chrIII	295484	295556	+	tT(AGU)C	-17	na
chrIII	295468	295469	+	11698	30751	59251	3	3	11	SITE0526	CLUST101		chrIII	295484	295556	+	tT(AGU)C	-16	na
chrIII	295470	295471	-	66	11755	24130	1	1	2	SITE0530	CLUST101		chrIII	295484	295556	+	tT(AGU)C	-14	na
chrIII	295471	295472	-	30809	32067	74761	5	8	10	SITE0531	CLUST101		chrIII	295484	295556	+	tT(AGU)C	-13	na
chrIV	83527	83528	-	0	0	53	0	0	1	SITE0551	CLUST104		chrIV	83548	83618	+	tG(GCC)D1	-21	na
chrIV	83529	83530	-	0	0	11687	0	0	1	SITE0553	CLUST104		chrIV	83548	83618	+	tG(GCC)D1	-19	na
chrIV	83530	83531	+	253	0	1660	1	0	1	SITE0554	CLUST104		chrIV	83548	83618	+	tG(GCC)D1	-18	na
chrIV	83531	83532	+	21740	17443	42165	4	6	3	SITE0555	CLUST104		chrIV	83548	83618	+	tG(GCC)D1	-17	na
chrIV	83532	83533	+	94396	79789	149936	20	30	29	SITE0556	CLUST104		chrIV	83548	83618	+	tG(GCC)D1	-16	na
chrIV	83534	83535	-	281	4456	55411	1	2	4	SITE0562	CLUST104		chrIV	83548	83618	+	tG(GCC)D1	-14	na
chrIV	83535	83536	-	23561	130800	107601	14	29	23	SITE0564	CLUST104		chrIV	83548	83618	+	tG(GCC)D1	-13	na
chrIV	83536	83537	-	0	1652	0	0	1	0	SITE0565	CLUST104		chrIV	83548	83618	+	tG(GCC)D1	-12	na
chrIV	83538	83539	+	0	2534	0	0	1	0	SITE0566	CLUST104		chrIV	83548	83618	+	tG(GCC)D1	-10	na
chrIV	299567	299568	+	0	0	1982	0	0	1	SITE0599	CLUST118		chrIV	298417	300003	-	YDL088C	0	436
chrIV	359559	359560	+	408	0	0	1	0	0	SITE0610	CLUST124		chrIV	359577	359672	+	tK(UUU)D	-18	na
chrIV	359561	359562	+	72160	54610	83267	15	22	24	SITE0612	CLUST124		chrIV	359577	359672	+	tK(UUU)D	-16	na
chrIV	359564	359565	-	62952	35844	41838	12	13	18	SITE0618	CLUST124		chrIV	359577	359672	+	tK(UUU)D	-13	na
chrIV	410363	410364	+	1505	2055	0	2	1	0	SITE0628	CLUST127		chrIV	410379	410451	+	tA(AGC)D	-16	na
chrIV	410364	410365	+	36264	39869	27569	8	10	4	SITE0629	CLUST127		chrIV	410379	410451	+	tA(AGC)D	-15	na
chrIV	410365	410366	+	15455	3511	0	2	1	0	SITE0630	CLUST127		chrIV	410379	410451	+	tA(AGC)D	-14	na
chrIV	410366	410367	+	747	0	385	1	0	1	SITE0632	CLUST127		chrIV	410379	410451	+	tA(AGC)D	-13	na
chrIV	410366	410367	-	0	0	7015	0	0	1	SITE0634	CLUST127		chrIV	410379	410451	+	tA(AGC)D	-13	na
chrIV	410367	410368	-	82826	32342	17238	8	13	9	SITE0635	CLUST127		chrIV	410379	410451	+	tA(AGC)D	-12	na
chrIV	434346	434347	+	0	4182	0	0	1	0	SITE0642	CLUST129		chrIV	434264	434336	-	tT(AGU)D	-10	na
chrIV	434348	434349	+	0	7514	16037	0	7	6	SITE0644	CLUST129		chrIV	434264	434336	-	tT(AGU)D	-12	na
chrIV	434349	434350	+	1989	6624	12371	2	4	5	SITE0645	CLUST129		chrIV	434264	434336	-	tT(AGU)D	-13	na
chrIV	434349	434350	-	9566	0	0	1	0	0	SITE0646	CLUST129		chrIV	434264	434336	-	tT(AGU)D	-14	na
chrIV	434350	434351	+	538	14544	0	1	1	0	SITE0647	CLUST129		chrIV	434264	434336	-	tT(AGU)D	-14	na
chrIV	434350	434351	-	1037	8947	4187	1	2	1	SITE0648	CLUST129		chrIV	434264	434336	-	tT(AGU)D	-15	na
chrIV	434351	434352	-	18540	23683	38532	2	6	5	SITE0649	CLUST129		chrIV	434264	434336	-	tT(AGU)D	-16	na
chrIV	434352	434353	-	29145	28935	51460	5	5	6	SITE0650	CLUST129		chrIV	434264	434336	-	tT(AGU)D	-17	na
chrIV	434358	434359	+	0	0	3098	0	0	1	SITE0652	CLUST129		chrIV	434264	434336	-	tT(AGU)D	-22	na
chrIV	437750	437751	-	0	0	7781	0	0	1	SITE0655	CLUST130		chrIV	437772	437853	+	tS(AGA)D1	-22	na
chrIV	437753	437754	+	10491	0	0	1	0	0	SITE0656	CLUST130		chrIV	437772	437853	+	tS(AGA)D1	-19	na
chrIV	437754	437755	+	16769	0	0	2	0	0	SITE0657	CLUST130		chrIV	437772	437853	+	tS(AGA)D1	-18	na
chrIV	437756	437757	+	32732	20513	57048	9	10	9	SITE0659	CLUST130		chrIV	437772	437853	+	tS(AGA)D1	-16	na
chrIV	437757	437758	+	13175	202	12653	2	1	4	SITE0661	CLUST130		chrIV	437772	437853	+	tS(AGA)D1	-15	na
chrIV	437758	437759	+	0	4176	0	0	1	0	SITE0663	CLUST130		chrIV	437772	437853	+	tS(AGA)D1	-14	na
chrIV	437757	437758	-	0	4208	7589	0	2	2	SITE0664	CLUST130		chrIV	437772	437853	+	tS(AGA)D1	-15	na
chrIV	437759	437760	-	21820	25093	39274	5	8	8	SITE0667	CLUST130		chrIV	437772	437853	+	tS(AGA)D1	-13	na
chrIV	437760	437761	-	1564	0	406	2	0	1	SITE0668	CLUST130		chrIV	437772	437853	+	tS(AGA)D1	-12	na
chrIV	437765	437766	+	404	0	0	1	0	0	SITE0670	CLUST130		chrIV	437772	437853	+	tS(AGA)D1	-7	na
chrIV	437765	437766	-	0	0	300	0	0	1	SITE0671	CLUST130		chrIV	437772	437853	+	tS(AGA)D1	-7	na
chrIV	488882	488883	+	0	0	3446	0	0	1	SITE0678	CLUST133		chrIV	488797	488870	-	tV(UAC)D	-12	na
chrIV	488882	488883	-	0	0	813	0	0	1	SITE0679	CLUST133		chrIV	488797	488870	-	tV(UAC)D	-13	na
chrIV	488883	488884	+	136938	103166	243434	35	42	61	SITE0680	CLUST133		chrIV	488797	488870	-	tV(UAC)D	-13	na
chrIV	488886	488887	-	128924	165331	319300	39	49	61	SITE0685	CLUST133		chrIV	488797	488870	-	tV(UAC)D	-17	na
chrIV	488887	488888	-	0	2856	0	0	1	0	SITE0687	CLUST133		chrIV	488797	488870	-	tV(UAC)D	-18	na
chrIV	488892	488893	+	0	808	0	0	1	0	SITE0688	CLUST133		chrIV	488797	488870	-	tV(UAC)D	-22	na
chrIV	508123	508124	-	0	0	196	0	0	1	SITE0693	CLUST137		chrIV	508147	509109	+	YDR033W	-24	na
chrIV	519721	519722	+	0	1392	1631	0	1	1	SITE0694	CLUST138		chrIV	519743	519826	+	tL(UAA)D	-22	na
chrIV	519726	519727	+	47472	34401	141262	13	12	24	SITE0696	CLUST138		chrIV	519743	519826	+	tL(UAA)D	-17	na
chrIV	519725	519726	-	0	1368	0	0	1	0	SITE0697	CLUST138		chrIV	519743	519826	+	tL(UAA)D	-18	na
chrIV	519727	519728	+	189	15932	19449	1	4	3	SITE0698	CLUST138		chrIV	519743	519826	+	tL(UAA)D	-16	na
chrIV	519728	519729	+	213	6826	0	1	2	0	SITE0699	CLUST138		chrIV	519743	519826	+	tL(UAA)D	-15	na
chrIV	519729	519730	+	7236	7008	4443	1	2	2	SITE0701	CLUST138		chrIV	519743	519826	+	tL(UAA)D	-14	na
chrIV	519729	519730	-	49348	22428	130855	13	14	33	SITE0702	CLUST138		chrIV	519743	519826	+	tL(UAA)D	-14	na
chrIV	519730	519731	+	17397	0	0	1	0	0	SITE0703	CLUST138		chrIV	519743	519826	+	tL(UAA)D	-13	na
chrIV	519730	519731	-	92	6207	18404	1	3	3	SITE0705	CLUST138		chrIV	519743	519826	+	tL(UAA)D	-13	na
chrIV	519731	519732	-	0	0	1351	0	0	1	SITE0706	CLUST138		chrIV	519743	519826	+	tL(UAA)D	-12	na
chrIV	519733	519734	-	4534	0	0	2	0	0	SITE0708	CLUST138		chrIV	519743	519826	+	tL(UAA)D	-10	na
chrIV	520956	520957	+	0	7370	235	0	4	1	SITE0710	CLUST139		chrIV	520972	521043	+	tQ(UUG)D1	-16	na
chrIV	520957	520958	+	0	915	12541	0	1	2	SITE0711	CLUST139		chrIV	520972	521043	+	tQ(UUG)D1	-15	na
chrIV	520959	520960	-	0	8636	7723	0	5	1	SITE0712	CLUST139		chrIV	520972	521043	+	tQ(UUG)D1	-13	na
chrIV	520960	520961	-	0	12182	0	0	2	0	SITE0713	CLUST139		chrIV	520972	521043	+	tQ(UUG)D1	-12	na
chrIV	520962	520963	-	269	0	0	1	0	0	SITE0714	CLUST139		chrIV	520972	521043	+	tQ(UUG)D1	-10	na
chrIV	520966	520967	+	455	0	0	1	0	0	SITE0715	CLUST139		chrIV	520972	521043	+	tQ(UUG)D1	-6	na
chrIV	520965	520966	-	0	0	2596	0	0	1	SITE0716	CLUST139		chrIV	520972	521043	+	tQ(UUG)D1	-7	na
chrIV	542416	542417	-	0	1341	0	0	1	0	SITE0718	CLUST141		chrIV	542674	543369	-	YDR043C	952	na
chrIV	568853	568854	+	410	0	0	1	0	0	SITE0721	CLUST143		chrIV	568882	568953	+	tR(UCU)D	-29	na
chrIV	568860	568861	-	0	0	397	0	0	1	SITE0722	CLUST143		chrIV	568882	568953	+	tR(UCU)D	-22	na
chrIV	568865	568866	+	55819	52753	120024	7	18	17	SITE0724	CLUST143		chrIV	568882	568953	+	tR(UCU)D	-17	na
chrIV	568866	568867	+	0	7556	0	0	1	0	SITE0726	CLUST143		chrIV	568882	568953	+	tR(UCU)D	-16	na
chrIV	568867	568868	-	0	5627	0	0	1	0	SITE0729	CLUST143		chrIV	568882	568953	+	tR(UCU)D	-15	na
chrIV	568868	568869	-	53562	45244	16331	11	23	9	SITE0731	CLUST143		chrIV	568882	568953	+	tR(UCU)D	-14	na
chrIV	568870	568871	+	0	52	0	0	1	0	SITE0733	CLUST143		chrIV	568882	568953	+	tR(UCU)D	-12	na
chrIV	568870	568871	-	971	1334	0	1	2	0	SITE0734	CLUST143		chrIV	568882	568953	+	tR(UCU)D	-12	na
chrIV	568948	568949	+	332	5583	7167	1	2	1	SITE0737	CLUST144		chrIV	568882	568953	+	tR(UCU)D	0	66
chrIV	568951	568952	-	0	207	14443	0	1	1	SITE0742	CLUST144		chrIV	568882	568953	+	tR(UCU)D	0	70
chrIV	568952	568953	-	0	3193	0	0	1	0	SITE0743	CLUST144		chrIV	568882	568953	+	tR(UCU)D	0	71
chrIV	620050	620051	+	6580	0	0	1	0	0	SITE0749	CLUST145		chrIV	619969	620041	-	tR(ACG)D	-9	na
chrIV	620052	620053	-	0	890	0	0	1	0	SITE0751	CLUST145		chrIV	619969	620041	-	tR(ACG)D	-12	na
chrIV	620053	620054	+	15570	8627	16643	2	2	2	SITE0752	CLUST145		chrIV	619969	620041	-	tR(ACG)D	-12	na
chrIV	620054	620055	+	35226	21090	30205	4	10	6	SITE0753	CLUST145		chrIV	619969	620041	-	tR(ACG)D	-13	na
chrIV	620055	620056	+	20766	22993	48876	5	6	10	SITE0754	CLUST145		chrIV	619969	620041	-	tR(ACG)D	-14	na
chrIV	620056	620057	-	197	6648	967	1	1	2	SITE0757	CLUST145		chrIV	619969	620041	-	tR(ACG)D	-16	na
chrIV	620057	620058	-	7998	5560	22797	5	4	4	SITE0758	CLUST145		chrIV	619969	620041	-	tR(ACG)D	-17	na
chrIV	620058	620059	-	1622	5611	9976	2	2	4	SITE0759	CLUST145		chrIV	619969	620041	-	tR(ACG)D	-18	na
chrIV	645237	645238	-	212	1498	2723	1	1	2	SITE0766	CLUST147		chrIV	645153	645224	-	tQ(UUG)D2	-14	na
chrIV	645238	645239	-	39639	22357	16695	8	8	6	SITE0767	CLUST147		chrIV	645153	645224	-	tQ(UUG)D2	-15	na
chrIV	645239	645240	-	15448	33251	5351	3	6	4	SITE0768	CLUST147		chrIV	645153	645224	-	tQ(UUG)D2	-16	na
chrIV	645240	645241	-	10758	8119	7592	3	3	4	SITE0769	CLUST147		chrIV	645153	645224	-	tQ(UUG)D2	-17	na
chrIV	668080	668081	-	0	2850	0	0	1	0	SITE0781	CLUST149		chrIV	668007	668080	-	tI(AAU)D	-1	na
chrIV	668089	668090	+	14455	5663	0	1	2	0	SITE0782	CLUST149		chrIV	668007	668080	-	tI(AAU)D	-9	na
chrIV	668091	668092	+	7961	3707	21380	4	3	7	SITE0784	CLUST149		chrIV	668007	668080	-	tI(AAU)D	-11	na
chrIV	668092	668093	+	5606	32293	14393	4	11	11	SITE0785	CLUST149		chrIV	668007	668080	-	tI(AAU)D	-12	na
chrIV	668093	668094	+	0	0	2683	0	0	1	SITE0786	CLUST149		chrIV	668007	668080	-	tI(AAU)D	-13	na
chrIV	668094	668095	-	17792	15535	12909	4	4	6	SITE0790	CLUST149		chrIV	668007	668080	-	tI(AAU)D	-15	na
chrIV	668095	668096	-	16353	27813	17083	8	10	7	SITE0791	CLUST149		chrIV	668007	668080	-	tI(AAU)D	-16	na
chrIV	722525	722526	-	79	0	0	1	0	0	SITE0802	CLUST153		chrIV	723004	727551	-	YDR135C	5025	na
chrIV	802811	802812	+	0	0	219	0	0	1	SITE0813	CLUST161		chrIV	802731	802802	-	tQ(UUG)D3	-9	na
chrIV	802814	802815	+	5820	21761	28846	9	11	19	SITE0816	CLUST161		chrIV	802731	802802	-	tQ(UUG)D3	-12	na
chrIV	802815	802816	-	0	68	0	0	1	0	SITE0818	CLUST161		chrIV	802731	802802	-	tQ(UUG)D3	-14	na
chrIV	802817	802818	-	17676	39749	57422	8	22	15	SITE0820	CLUST161		chrIV	802731	802802	-	tQ(UUG)D3	-16	na
chrIV	802818	802819	-	0	1475	0	0	2	0	SITE0821	CLUST161		chrIV	802731	802802	-	tQ(UUG)D3	-17	na
chrIV	868021	868022	-	0	2388	0	0	1	0	SITE0832	CLUST166		chrIV	868224	870563	+	YDR208W	-203	na
chrIV	884348	884349	+	0	0	14126	0	0	2	SITE0835	CLUST167		chrIV	884361	884493	+	tI(UAU)D	-13	na
chrIV	884349	884350	+	1894	19852	61024	1	6	10	SITE0836	CLUST167		chrIV	884361	884493	+	tI(UAU)D	-12	na
chrIV	884350	884351	+	7081	0	4141	2	0	1	SITE0837	CLUST167		chrIV	884361	884493	+	tI(UAU)D	-11	na
chrIV	884351	884352	-	167	1085	0	1	1	0	SITE0839	CLUST167		chrIV	884361	884493	+	tI(UAU)D	-10	na
chrIV	884352	884353	-	6962	9194	4285	3	6	4	SITE0840	CLUST167		chrIV	884361	884493	+	tI(UAU)D	-9	na
chrIV	884353	884354	-	398	2034	4279	1	2	1	SITE0841	CLUST167		chrIV	884361	884493	+	tI(UAU)D	-8	na
chrIV	945953	945954	-	0	257	0	0	1	0	SITE0845	CLUST169		chrIV	946312	946400	+	tY(GUA)D	-359	na
chrIV	946295	946296	+	31153	30044	68016	6	11	12	SITE0851	CLUST170		chrIV	946312	946400	+	tY(GUA)D	-17	na
chrIV	946296	946297	+	0	0	5349	0	0	1	SITE0852	CLUST170		chrIV	946312	946400	+	tY(GUA)D	-16	na
chrIV	946297	946298	+	26008	30124	90729	4	9	21	SITE0853	CLUST170		chrIV	946312	946400	+	tY(GUA)D	-15	na
chrIV	946298	946299	-	44547	17228	80984	3	9	6	SITE0857	CLUST170		chrIV	946312	946400	+	tY(GUA)D	-14	na
chrIV	946300	946301	-	38566	85175	32225	10	13	6	SITE0859	CLUST170		chrIV	946312	946400	+	tY(GUA)D	-12	na
chrIV	946301	946302	-	0	0	12733	0	0	1	SITE0860	CLUST170		chrIV	946312	946400	+	tY(GUA)D	-11	na
chrIV	946302	946303	-	9212	0	0	1	0	0	SITE0861	CLUST170		chrIV	946312	946400	+	tY(GUA)D	-10	na
chrIV	954167	954168	+	0	0	61	0	0	1	SITE0864	CLUST172		chrIV	954288	954947	+	YDR246W	-121	na
chrIV	981064	981065	+	302	0	0	2	0	0	SITE0868	CLUST173		chrIV	980974	981055	-	tS(AGA)D2	-9	na
chrIV	981066	981067	+	0	13214	9036	0	4	2	SITE0869	CLUST173		chrIV	980974	981055	-	tS(AGA)D2	-11	na
chrIV	981067	981068	+	19716	0	0	1	0	0	SITE0870	CLUST173		chrIV	980974	981055	-	tS(AGA)D2	-12	na
chrIV	981067	981068	-	1480	1338	0	1	1	0	SITE0872	CLUST173		chrIV	980974	981055	-	tS(AGA)D2	-13	na
chrIV	981069	981070	+	419	0	70	2	0	1	SITE0873	CLUST173		chrIV	980974	981055	-	tS(AGA)D2	-14	na
chrIV	981069	981070	-	4484	9322	1718	1	3	1	SITE0875	CLUST173		chrIV	980974	981055	-	tS(AGA)D2	-15	na
chrIV	981070	981071	-	6852	0	0	1	0	0	SITE0876	CLUST173		chrIV	980974	981055	-	tS(AGA)D2	-16	na
chrIV	981072	981073	-	0	0	17350	0	0	3	SITE0879	CLUST173		chrIV	980974	981055	-	tS(AGA)D2	-18	na
chrIV	981077	981078	+	0	0	911	0	0	1	SITE0880	CLUST173		chrIV	980974	981055	-	tS(AGA)D2	-22	na
chrIV	992814	992815	+	0	13876	16382	0	4	2	SITE0884	CLUST174		chrIV	992832	992902	+	tG(GCC)D2	-18	na
chrIV	992816	992817	+	27031	40581	37373	8	11	7	SITE0886	CLUST174		chrIV	992832	992902	+	tG(GCC)D2	-16	na
chrIV	992817	992818	+	0	0	3581	0	0	1	SITE0888	CLUST174		chrIV	992832	992902	+	tG(GCC)D2	-15	na
chrIV	992817	992818	-	949	485	18575	1	1	4	SITE0889	CLUST174		chrIV	992832	992902	+	tG(GCC)D2	-15	na
chrIV	992818	992819	-	170	0	0	1	0	0	SITE0891	CLUST174		chrIV	992832	992902	+	tG(GCC)D2	-14	na
chrIV	992819	992820	-	43746	101558	38179	8	21	10	SITE0893	CLUST174		chrIV	992832	992902	+	tG(GCC)D2	-13	na
chrIV	992821	992822	+	50763	0	0	2	0	0	SITE0894	CLUST174		chrIV	992832	992902	+	tG(GCC)D2	-11	na
chrIV	992821	992822	-	0	767	0	0	1	0	SITE0896	CLUST174		chrIV	992832	992902	+	tG(GCC)D2	-11	na
chrIV	1017290	1017291	+	0	0	9994	0	0	1	SITE0904	CLUST177		chrIV	1017001	1017318	-	YDR278C	0	28
chrIV	1017291	1017292	+	139332	34409	89008	23	17	19	SITE0906	CLUST177		chrIV	1017001	1017318	-	YDR278C	0	27
chrIV	1017292	1017293	+	840	7501	14989	1	5	3	SITE0907	CLUST177		chrIV	1017001	1017318	-	YDR278C	0	26
chrIV	1017293	1017294	+	773	8060	0	1	3	0	SITE0908	CLUST177		chrIV	1017001	1017318	-	YDR278C	0	25
chrIV	1017294	1017295	-	94835	36135	107967	17	16	23	SITE0911	CLUST177		chrIV	1017001	1017318	-	YDR278C	0	23
chrIV	1017295	1017296	-	5384	0	28945	1	0	3	SITE0912	CLUST177		chrIV	1017001	1017318	-	YDR278C	0	22
chrIV	1017298	1017299	-	0	7921	0	0	2	0	SITE0914	CLUST177		chrIV	1017001	1017318	-	YDR278C	0	19
chrIV	1023133	1023134	+	0	421	0	0	3	0	SITE0921	CLUST179		chrIV	1023511	1024755	-	YDR282C	1622	na
chrIV	1075547	1075548	+	0	0	333	0	0	1	SITE0931	CLUST180		chrIV	1075472	1075544	-	tV(CAC)D	-3	na
chrIV	1075555	1075556	+	50849	37502	61861	12	10	11	SITE0933	CLUST180		chrIV	1075472	1075544	-	tV(CAC)D	-11	na
chrIV	1075556	1075557	+	30254	16661	35800	4	7	6	SITE0934	CLUST180		chrIV	1075472	1075544	-	tV(CAC)D	-12	na
chrIV	1075557	1075558	+	111423	62998	68237	19	18	15	SITE0935	CLUST180		chrIV	1075472	1075544	-	tV(CAC)D	-13	na
chrIV	1075558	1075559	+	0	0	357	0	0	1	SITE0938	CLUST180		chrIV	1075472	1075544	-	tV(CAC)D	-14	na
chrIV	1075558	1075559	-	34883	31569	36373	6	9	11	SITE0939	CLUST180		chrIV	1075472	1075544	-	tV(CAC)D	-15	na
chrIV	1075559	1075560	-	14907	14610	33068	5	5	10	SITE0941	CLUST180		chrIV	1075472	1075544	-	tV(CAC)D	-16	na
chrIV	1075560	1075561	-	22687	89073	107525	9	17	13	SITE0942	CLUST180		chrIV	1075472	1075544	-	tV(CAC)D	-17	na
chrIV	1075561	1075562	-	15519	0	0	1	0	0	SITE0943	CLUST180		chrIV	1075472	1075544	-	tV(CAC)D	-18	na
chrIV	1095472	1095473	+	0	0	1644	0	0	2	SITE0948	CLUST183		chrIV	1095370	1095461	-	tF(GAA)D	-11	na
chrIV	1095474	1095475	+	33513	104614	168429	22	47	51	SITE0950	CLUST183		chrIV	1095370	1095461	-	tF(GAA)D	-13	na
chrIV	1095474	1095475	-	492	0	0	1	0	0	SITE0952	CLUST183		chrIV	1095370	1095461	-	tF(GAA)D	-14	na
chrIV	1095477	1095478	-	56565	108959	211536	18	31	41	SITE0955	CLUST183		chrIV	1095370	1095461	-	tF(GAA)D	-17	na
chrIV	1135550	1135551	-	385	0	0	1	0	0	SITE0964	CLUST187		chrIV	1133260	1135431	-	YDR333C	-120	na
chrIV	1150949	1150950	+	0	8701	2856	0	2	3	SITE0966	CLUST189		chrIV	1150881	1151183	+	YDR340W	0	68
chrIV	1150952	1150953	+	2354	1182	0	1	2	0	SITE0968	CLUST189		chrIV	1150881	1151183	+	YDR340W	0	71
chrIV	1150952	1150953	-	3111	4517	12747	1	1	1	SITE0970	CLUST189		chrIV	1150881	1151183	+	YDR340W	0	72
chrIV	1150953	1150954	+	30668	29155	48000	9	10	11	SITE0971	CLUST189		chrIV	1150881	1151183	+	YDR340W	0	72
chrIV	1150954	1150955	+	3052	0	0	2	0	0	SITE0972	CLUST189		chrIV	1150881	1151183	+	YDR340W	0	73
chrIV	1150955	1150956	+	51	10005	11203	1	3	2	SITE0973	CLUST189		chrIV	1150881	1151183	+	YDR340W	0	74
chrIV	1150955	1150956	-	2292	0	0	1	0	0	SITE0974	CLUST189		chrIV	1150881	1151183	+	YDR340W	0	75
chrIV	1150956	1150957	-	14841	24364	38719	7	10	6	SITE0976	CLUST189		chrIV	1150881	1151183	+	YDR340W	0	76
chrIV	1150957	1150958	-	0	2240	3309	0	1	1	SITE0977	CLUST189		chrIV	1150881	1151183	+	YDR340W	0	77
chrIV	1150958	1150959	-	2799	12781	23583	4	3	2	SITE0978	CLUST189		chrIV	1150881	1151183	+	YDR340W	0	78
chrIV	1151385	1151386	+	0	0	9538	0	0	1	SITE0979	CLUST190		chrIV	1150881	1151183	+	YDR340W	203	na
chrIV	1175813	1175814	+	14152	11498	10607	6	8	3	SITE0989	CLUST191		chrIV	1175829	1175901	+	tM(CAU)D	-16	na
chrIV	1175814	1175815	+	0	0	779	0	0	1	SITE0990	CLUST191		chrIV	1175829	1175901	+	tM(CAU)D	-15	na
chrIV	1175814	1175815	-	229	0	0	1	0	0	SITE0991	CLUST191		chrIV	1175829	1175901	+	tM(CAU)D	-15	na
chrIV	1175816	1175817	-	36926	99067	177024	8	23	23	SITE0994	CLUST191		chrIV	1175829	1175901	+	tM(CAU)D	-13	na
chrIV	1175817	1175818	+	147	2667	460	1	1	1	SITE0995	CLUST191		chrIV	1175829	1175901	+	tM(CAU)D	-12	na
chrIV	1175817	1175818	-	0	2443	10778	0	2	1	SITE0996	CLUST191		chrIV	1175829	1175901	+	tM(CAU)D	-12	na
chrIV	1175818	1175819	-	4003	0	0	1	0	0	SITE0997	CLUST191		chrIV	1175829	1175901	+	tM(CAU)D	-11	na
chrIV	1201733	1201734	+	0	13815	11913	0	2	2	SITE1006	CLUST194		chrIV	1201750	1201822	+	tK(CUU)D1	-17	na
chrIV	1201734	1201735	+	4186	19906	28755	4	9	7	SITE1007	CLUST194		chrIV	1201750	1201822	+	tK(CUU)D1	-16	na
chrIV	1201736	1201737	-	0	1889	723	0	1	1	SITE1010	CLUST194		chrIV	1201750	1201822	+	tK(CUU)D1	-14	na
chrIV	1201737	1201738	-	25378	42191	84385	7	13	15	SITE1012	CLUST194		chrIV	1201750	1201822	+	tK(CUU)D1	-13	na
chrIV	1201933	1201934	+	110	0	0	1	0	0	SITE1016	CLUST195		chrIV	1201750	1201822	+	tK(CUU)D1	112	na
chrIV	1233979	1233980	+	0	0	984	0	0	1	SITE1018	CLUST196		chrIV	1234218	1236125	+	YDR380W	-239	na
chrIV	1242966	1242967	+	0	0	1140	0	0	1	SITE1021	CLUST197		chrIV	1243230	1245758	+	YDR385W	-264	na
chrIV	1257090	1257091	+	19594	11736	6923	1	4	1	SITE1027	CLUST198		chrIV	1257008	1257079	-	tG(CCC)D	-11	na
chrIV	1257091	1257092	+	2994	2880	2419	1	1	2	SITE1028	CLUST198		chrIV	1257008	1257079	-	tG(CCC)D	-12	na
chrIV	1257092	1257093	+	80400	86209	204787	25	39	45	SITE1029	CLUST198		chrIV	1257008	1257079	-	tG(CCC)D	-13	na
chrIV	1257093	1257094	-	1607	13411	16551	3	4	3	SITE1033	CLUST198		chrIV	1257008	1257079	-	tG(CCC)D	-15	na
chrIV	1257094	1257095	-	21427	28926	23536	7	7	9	SITE1034	CLUST198		chrIV	1257008	1257079	-	tG(CCC)D	-16	na
chrIV	1257095	1257096	-	144060	99817	126486	31	34	35	SITE1035	CLUST198		chrIV	1257008	1257079	-	tG(CCC)D	-17	na
chrIV	1292418	1292419	+	0	0	197	0	0	1	SITE1044	CLUST202		chrIV	1292372	1293091	-	YDR410C	0	673
chrIV	1305611	1305612	+	0	676	0	0	1	0	SITE1049	CLUST203		chrIV	1305630	1305712	+	tS(AGA)D3	-19	na
chrIV	1305612	1305613	+	0	9816	4074	0	1	1	SITE1050	CLUST203		chrIV	1305630	1305712	+	tS(AGA)D3	-18	na
chrIV	1305613	1305614	+	0	0	233	0	0	1	SITE1051	CLUST203		chrIV	1305630	1305712	+	tS(AGA)D3	-17	na
chrIV	1305613	1305614	-	0	0	5832	0	0	1	SITE1052	CLUST203		chrIV	1305630	1305712	+	tS(AGA)D3	-17	na
chrIV	1305614	1305615	+	2005	25820	27987	4	14	13	SITE1053	CLUST203		chrIV	1305630	1305712	+	tS(AGA)D3	-16	na
chrIV	1305615	1305616	+	0	1170	2214	0	1	2	SITE1054	CLUST203		chrIV	1305630	1305712	+	tS(AGA)D3	-15	na
chrIV	1305615	1305616	-	0	12786	12974	0	2	2	SITE1056	CLUST203		chrIV	1305630	1305712	+	tS(AGA)D3	-15	na
chrIV	1305616	1305617	-	0	2170	6465	0	3	4	SITE1058	CLUST203		chrIV	1305630	1305712	+	tS(AGA)D3	-14	na
chrIV	1305617	1305618	-	19417	10394	98726	8	5	18	SITE1059	CLUST203		chrIV	1305630	1305712	+	tS(AGA)D3	-13	na
chrIV	1305618	1305619	-	275	1883	17600	1	1	1	SITE1061	CLUST203		chrIV	1305630	1305712	+	tS(AGA)D3	-12	na
chrIV	1305620	1305621	-	7284	0	0	1	0	0	SITE1063	CLUST203		chrIV	1305630	1305712	+	tS(AGA)D3	-10	na
chrIV	1331487	1331488	+	0	1961	0	0	1	0	SITE1065	CLUST205		chrIV	1331237	1332841	+	YDR434W	0	250
chrIV	1352547	1352548	+	1109	8332	13828	1	2	2	SITE1070	CLUST206		chrIV	1352182	1352589	-	YDR445C	0	42
chrIV	1352548	1352549	+	260	0	0	1	0	0	SITE1071	CLUST206		chrIV	1352182	1352589	-	YDR445C	0	41
chrIV	1352549	1352550	+	1732	22496	4217	4	8	5	SITE1072	CLUST206		chrIV	1352182	1352589	-	YDR445C	0	40
chrIV	1352550	1352551	-	18534	136	0	2	1	0	SITE1075	CLUST206		chrIV	1352182	1352589	-	YDR445C	0	38
chrIV	1352551	1352552	-	0	7352	11653	0	3	2	SITE1076	CLUST206		chrIV	1352182	1352589	-	YDR445C	0	37
chrIV	1352552	1352553	-	25930	28023	56786	5	12	11	SITE1077	CLUST206		chrIV	1352182	1352589	-	YDR445C	0	36
chrIV	1404311	1404312	+	0	19976	0	0	1	0	SITE1090	CLUST209		chrIV	1404445	1405854	-	YDR473C	1543	na
chrIV	1461841	1461842	+	2518	1648	12371	2	1	2	SITE1101	CLUST213		chrIV	1461715	1461829	-	tL(CAA)D	-12	na
chrIV	1461842	1461843	+	0	0	2212	0	0	1	SITE1102	CLUST213		chrIV	1461715	1461829	-	tL(CAA)D	-13	na
chrIV	1461844	1461845	-	171	0	15253	1	0	3	SITE1107	CLUST213		chrIV	1461715	1461829	-	tL(CAA)D	-16	na
chrIV	1461845	1461846	-	0	0	4046	0	0	1	SITE1108	CLUST213		chrIV	1461715	1461829	-	tL(CAA)D	-17	na
chrV	43169	43170	+	0	0	194	0	0	1	SITE1128	CLUST221		chrV	43252	44925	+	YEL058W	-83	na
chrV	61964	61965	+	0	7766	0	0	1	0	SITE1130	CLUST223		chrV	61890	61960	-	tG(GCC)E	-4	na
chrV	61969	61970	+	0	1314	0	0	1	0	SITE1133	CLUST223		chrV	61890	61960	-	tG(GCC)E	-9	na
chrV	61973	61974	+	70334	66594	144074	24	27	27	SITE1135	CLUST223		chrV	61890	61960	-	tG(GCC)E	-13	na
chrV	61975	61976	+	0	0	1308	0	0	1	SITE1139	CLUST223		chrV	61890	61960	-	tG(GCC)E	-15	na
chrV	61976	61977	-	70377	66861	76634	18	25	22	SITE1143	CLUST223		chrV	61890	61960	-	tG(GCC)E	-17	na
chrV	61978	61979	-	6232	2129	711	1	2	1	SITE1145	CLUST223		chrV	61890	61960	-	tG(GCC)E	-19	na
chrV	86586	86587	+	0	4345	0	0	1	0	SITE1152	CLUST225		chrV	86179	86598	+	YEL033W	0	407
chrV	86587	86588	+	38015	5762	2306	3	2	1	SITE1153	CLUST225		chrV	86179	86598	+	YEL033W	0	408
chrV	86588	86589	+	36617	64003	68305	13	15	18	SITE1154	CLUST225		chrV	86179	86598	+	YEL033W	0	409
chrV	86589	86590	+	0	10391	9319	0	4	2	SITE1155	CLUST225		chrV	86179	86598	+	YEL033W	0	410
chrV	86590	86591	-	0	123	5047	0	1	3	SITE1157	CLUST225		chrV	86179	86598	+	YEL033W	0	412
chrV	86591	86592	-	32770	37897	34102	8	15	13	SITE1158	CLUST225		chrV	86179	86598	+	YEL033W	0	413
chrV	86592	86593	-	23495	21040	13469	5	8	5	SITE1159	CLUST225		chrV	86179	86598	+	YEL033W	0	414
chrV	86594	86595	+	0	0	57	0	0	1	SITE1160	CLUST225		chrV	86179	86598	+	YEL033W	0	415
chrV	86595	86596	-	0	9937	0	0	1	0	SITE1162	CLUST225		chrV	86179	86598	+	YEL033W	0	417
chrV	86597	86598	-	0	0	6186	0	0	1	SITE1164	CLUST225		chrV	86179	86598	+	YEL033W	0	419
chrV	93165	93166	-	0	0	219	0	0	1	SITE1169	CLUST226		chrV	90258	93905	+	YEL031W	0	2908
chrV	100116	100117	+	33510	56	0	4	1	0	SITE1171	CLUST227		chrV	100133	100204	+	tM(CAU)E	-17	na
chrV	100117	100118	+	91282	48584	119180	16	21	24	SITE1172	CLUST227		chrV	100133	100204	+	tM(CAU)E	-16	na
chrV	100118	100119	+	56187	40486	46836	6	11	13	SITE1173	CLUST227		chrV	100133	100204	+	tM(CAU)E	-15	na
chrV	100119	100120	+	175	0	265	1	0	1	SITE1174	CLUST227		chrV	100133	100204	+	tM(CAU)E	-14	na
chrV	100119	100120	-	0	430	0	0	1	0	SITE1176	CLUST227		chrV	100133	100204	+	tM(CAU)E	-14	na
chrV	100120	100121	-	97482	102672	153599	20	20	28	SITE1178	CLUST227		chrV	100133	100204	+	tM(CAU)E	-13	na
chrV	100121	100122	-	59711	74025	46350	9	11	9	SITE1179	CLUST227		chrV	100133	100204	+	tM(CAU)E	-12	na
chrV	100122	100123	-	227	0	0	1	0	0	SITE1180	CLUST227		chrV	100133	100204	+	tM(CAU)E	-11	na
chrV	118118	118119	+	0	1730	91	0	1	1	SITE1188	CLUST229		chrV	117667	118035	-	RPR1	-83	na
chrV	118119	118120	+	73635	72533	138637	18	12	24	SITE1189	CLUST229		chrV	117667	118035	-	RPR1	-84	na
chrV	118121	118122	-	0	9160	0	0	1	0	SITE1192	CLUST229		chrV	117667	118035	-	RPR1	-87	na
chrV	118122	118123	-	119747	119545	78306	18	20	14	SITE1193	CLUST229		chrV	117667	118035	-	RPR1	-88	na
chrV	118143	118144	-	0	0	145	0	0	1	SITE1194	CLUST229		chrV	117667	118035	-	RPR1	-109	na
chrV	131163	131164	+	540	2815	5560	1	2	2	SITE1199	CLUST232		chrV	131082	131153	-	tQ(UUG)E2	-10	na
chrV	131165	131166	+	142806	84298	123696	20	26	18	SITE1202	CLUST232		chrV	131082	131153	-	tQ(UUG)E2	-12	na
chrV	131165	131166	-	0	5990	0	0	1	0	SITE1205	CLUST232		chrV	131082	131153	-	tQ(UUG)E2	-13	na
chrV	131166	131167	-	894	0	0	2	0	0	SITE1206	CLUST232		chrV	131082	131153	-	tQ(UUG)E2	-14	na
chrV	131168	131169	-	118746	76425	101136	23	21	16	SITE1208	CLUST232		chrV	131082	131153	-	tQ(UUG)E2	-16	na
chrV	135509	135510	+	6418	54495	52739	9	25	21	SITE1212	CLUST233		chrV	135425	135497	-	tK(CUU)E1	-12	na
chrV	135510	135511	-	8781	0	0	1	0	0	SITE1215	CLUST233		chrV	135425	135497	-	tK(CUU)E1	-14	na
chrV	135512	135513	-	42224	26238	76872	18	20	24	SITE1217	CLUST233		chrV	135425	135497	-	tK(CUU)E1	-16	na
chrV	138650	138651	+	96458	49039	133176	15	14	19	SITE1222	CLUST234		chrV	138666	138737	+	tR(UCU)E	-16	na
chrV	138651	138652	+	5079	1982	0	2	1	0	SITE1223	CLUST234		chrV	138666	138737	+	tR(UCU)E	-15	na
chrV	138652	138653	-	0	0	70	0	0	1	SITE1226	CLUST234		chrV	138666	138737	+	tR(UCU)E	-14	na
chrV	138653	138654	-	65300	55528	78004	12	18	22	SITE1227	CLUST234		chrV	138666	138737	+	tR(UCU)E	-13	na
chrV	138654	138655	-	0	15027	1822	0	3	2	SITE1228	CLUST234		chrV	138666	138737	+	tR(UCU)E	-12	na
chrV	177071	177072	-	0	0	11592	0	0	1	SITE1237	CLUST239		chrV	177099	177170	+	tE(UUC)E1	-28	na
chrV	177082	177083	+	8008	0	335	1	0	1	SITE1238	CLUST239		chrV	177099	177170	+	tE(UUC)E1	-17	na
chrV	177083	177084	+	5575	10181	40134	3	5	7	SITE1239	CLUST239		chrV	177099	177170	+	tE(UUC)E1	-16	na
chrV	177084	177085	+	0	16716	10276	0	4	2	SITE1240	CLUST239		chrV	177099	177170	+	tE(UUC)E1	-15	na
chrV	177084	177085	-	0	3595	0	0	1	0	SITE1242	CLUST239		chrV	177099	177170	+	tE(UUC)E1	-15	na
chrV	177085	177086	-	0	0	4412	0	0	4	SITE1244	CLUST239		chrV	177099	177170	+	tE(UUC)E1	-14	na
chrV	177086	177087	+	415	0	87	1	0	1	SITE1245	CLUST239		chrV	177099	177170	+	tE(UUC)E1	-13	na
chrV	177086	177087	-	27241	9091	5096	5	2	2	SITE1246	CLUST239		chrV	177099	177170	+	tE(UUC)E1	-13	na
chrV	177087	177088	-	332	8515	5168	2	3	2	SITE1247	CLUST239		chrV	177099	177170	+	tE(UUC)E1	-12	na
chrV	177089	177090	-	0	126	0	0	1	0	SITE1248	CLUST239		chrV	177099	177170	+	tE(UUC)E1	-10	na
chrV	177090	177091	-	0	0	1404	0	0	1	SITE1249	CLUST239		chrV	177099	177170	+	tE(UUC)E1	-9	na
chrV	207341	207342	+	39615	51420	54723	11	13	10	SITE1255	CLUST241		chrV	207357	207428	+	tH(GUG)E1	-16	na
chrV	207342	207343	+	0	1387	854	0	1	1	SITE1256	CLUST241		chrV	207357	207428	+	tH(GUG)E1	-15	na
chrV	207343	207344	+	1682	29652	14162	8	12	5	SITE1257	CLUST241		chrV	207357	207428	+	tH(GUG)E1	-14	na
chrV	207344	207345	+	0	1032	0	0	1	0	SITE1258	CLUST241		chrV	207357	207428	+	tH(GUG)E1	-13	na
chrV	207345	207346	+	22417	31543	19757	4	5	3	SITE1260	CLUST241		chrV	207357	207428	+	tH(GUG)E1	-12	na
chrV	207344	207345	-	656	15808	16319	2	7	7	SITE1261	CLUST241		chrV	207357	207428	+	tH(GUG)E1	-13	na
chrV	207345	207346	-	0	0	1207	0	0	1	SITE1262	CLUST241		chrV	207357	207428	+	tH(GUG)E1	-12	na
chrV	207346	207347	-	63494	21106	57760	5	9	12	SITE1264	CLUST241		chrV	207357	207428	+	tH(GUG)E1	-11	na
chrV	207348	207349	-	1668	3060	33263	2	2	5	SITE1268	CLUST241		chrV	207357	207428	+	tH(GUG)E1	-9	na
chrV	207349	207350	-	0	0	720	0	0	1	SITE1270	CLUST241		chrV	207357	207428	+	tH(GUG)E1	-8	na
chrV	238121	238122	+	123	0	0	1	0	0	SITE1273	CLUST242		chrV	237570	238016	-	YER044C	-105	na
chrV	238470	238471	-	0	1678	0	0	1	0	SITE1274	CLUST243		chrV	238460	239774	-	YER044C-A	0	1303
chrV	250270	250271	+	18414	33028	61320	1	9	10	SITE1283	CLUST245		chrV	250286	250357	+	tQ(UUG)E1	-16	na
chrV	250271	250272	+	0	1206	19642	0	1	7	SITE1284	CLUST245		chrV	250286	250357	+	tQ(UUG)E1	-15	na
chrV	250272	250273	+	780	551	10201	2	1	4	SITE1285	CLUST245		chrV	250286	250357	+	tQ(UUG)E1	-14	na
chrV	250271	250272	-	0	66	0	0	1	0	SITE1286	CLUST245		chrV	250286	250357	+	tQ(UUG)E1	-15	na
chrV	250273	250274	-	8545	4503	54326	7	5	14	SITE1289	CLUST245		chrV	250286	250357	+	tQ(UUG)E1	-13	na
chrV	250274	250275	+	0	228	0	0	1	0	SITE1290	CLUST245		chrV	250286	250357	+	tQ(UUG)E1	-12	na
chrV	250274	250275	-	21838	117	15183	3	1	4	SITE1291	CLUST245		chrV	250286	250357	+	tQ(UUG)E1	-12	na
chrV	250275	250276	-	336	17602	7722	2	4	4	SITE1292	CLUST245		chrV	250286	250357	+	tQ(UUG)E1	-11	na
chrV	288521	288522	-	0	2318	0	0	1	0	SITE1308	CLUST250		chrV	288443	288524	-	tS(UGA)E	0	2
chrV	288531	288532	+	0	776	0	0	1	0	SITE1311	CLUST250		chrV	288443	288524	-	tS(UGA)E	-7	na
chrV	288532	288533	+	6699	16327	65873	4	7	9	SITE1312	CLUST250		chrV	288443	288524	-	tS(UGA)E	-8	na
chrV	288534	288535	+	384	115	96	2	1	1	SITE1316	CLUST250		chrV	288443	288524	-	tS(UGA)E	-10	na
chrV	288535	288536	+	0	0	6478	0	0	1	SITE1317	CLUST250		chrV	288443	288524	-	tS(UGA)E	-11	na
chrV	288536	288537	+	22963	21620	17208	5	5	3	SITE1319	CLUST250		chrV	288443	288524	-	tS(UGA)E	-12	na
chrV	288535	288536	-	77945	16965	17966	7	2	7	SITE1320	CLUST250		chrV	288443	288524	-	tS(UGA)E	-12	na
chrV	288537	288538	-	0	62	16696	0	1	1	SITE1323	CLUST250		chrV	288443	288524	-	tS(UGA)E	-14	na
chrV	288539	288540	+	247	0	886	1	0	1	SITE1325	CLUST250		chrV	288443	288524	-	tS(UGA)E	-15	na
chrV	288539	288540	-	185	6667	15062	1	3	3	SITE1327	CLUST250		chrV	288443	288524	-	tS(UGA)E	-16	na
chrV	312105	312106	+	26324	33771	7869	7	5	3	SITE1341	CLUST252		chrV	312023	312095	-	tA(UGC)E	-10	na
chrV	312106	312107	+	0	6058	17945	0	2	1	SITE1342	CLUST252		chrV	312023	312095	-	tA(UGC)E	-11	na
chrV	312107	312108	+	720	8021	12133	1	3	2	SITE1344	CLUST252		chrV	312023	312095	-	tA(UGC)E	-12	na
chrV	312107	312108	-	15422	0	0	1	0	0	SITE1346	CLUST252		chrV	312023	312095	-	tA(UGC)E	-13	na
chrV	312108	312109	+	86093	50507	109814	15	17	19	SITE1347	CLUST252		chrV	312023	312095	-	tA(UGC)E	-13	na
chrV	312108	312109	-	27046	19422	49026	6	9	10	SITE1349	CLUST252		chrV	312023	312095	-	tA(UGC)E	-14	na
chrV	312109	312110	-	14719	0	0	2	0	0	SITE1350	CLUST252		chrV	312023	312095	-	tA(UGC)E	-15	na
chrV	312110	312111	-	29877	0	1360	2	0	1	SITE1351	CLUST252		chrV	312023	312095	-	tA(UGC)E	-16	na
chrV	312111	312112	-	92275	57623	87242	11	12	15	SITE1352	CLUST252		chrV	312023	312095	-	tA(UGC)E	-17	na
chrV	312114	312115	-	0	0	4266	0	0	1	SITE1355	CLUST252		chrV	312023	312095	-	tA(UGC)E	-20	na
chrV	354916	354917	+	0	252	0	0	1	0	SITE1362	CLUST255		chrV	354934	355005	+	tE(UUC)E2	-18	na
chrV	354917	354918	+	6601	42882	76302	4	10	12	SITE1364	CLUST255		chrV	354934	355005	+	tE(UUC)E2	-17	na
chrV	354918	354919	+	1298	4743	31183	3	2	5	SITE1365	CLUST255		chrV	354934	355005	+	tE(UUC)E2	-16	na
chrV	354919	354920	+	0	1044	0	0	1	0	SITE1366	CLUST255		chrV	354934	355005	+	tE(UUC)E2	-15	na
chrV	354918	354919	-	569	8814	0	1	1	0	SITE1367	CLUST255		chrV	354934	355005	+	tE(UUC)E2	-16	na
chrV	354920	354921	-	16177	47312	100222	10	16	20	SITE1370	CLUST255		chrV	354934	355005	+	tE(UUC)E2	-14	na
chrV	354921	354922	-	0	3260	4260	0	1	1	SITE1371	CLUST255		chrV	354934	355005	+	tE(UUC)E2	-13	na
chrV	354926	354927	+	174	0	0	1	0	0	SITE1374	CLUST255		chrV	354934	355005	+	tE(UUC)E2	-8	na
chrV	355750	355751	+	1072	0	0	1	0	0	SITE1375	CLUST256		chrV	355466	357730	+	YER098W	0	284
chrV	382417	382418	-	0	0	144	0	0	1	SITE1380	CLUST259		chrV	382595	385876	-	YER111C	3458	na
chrV	431377	431378	+	785	0	0	1	0	0	SITE1384	CLUST261		chrV	431125	431216	-	snR52	-161	na
chrV	431378	431379	+	37636	54908	87817	12	25	23	SITE1385	CLUST261		chrV	431125	431216	-	snR52	-162	na
chrV	431379	431380	+	0	2122	6192	0	1	2	SITE1386	CLUST261		chrV	431125	431216	-	snR52	-163	na
chrV	431380	431381	+	230	8259	0	1	1	0	SITE1387	CLUST261		chrV	431125	431216	-	snR52	-164	na
chrV	431380	431381	-	0	81	0	0	1	0	SITE1388	CLUST261		chrV	431125	431216	-	snR52	-165	na
chrV	431381	431382	-	65931	88535	142813	10	26	22	SITE1389	CLUST261		chrV	431125	431216	-	snR52	-166	na
chrV	431383	431384	-	30929	0	0	5	0	0	SITE1392	CLUST261		chrV	431125	431216	-	snR52	-168	na
chrV	434625	434626	-	2103	0	0	1	0	0	SITE1402	CLUST262		chrV	434541	434612	-	tH(GUG)E2	-14	na
chrV	434626	434627	-	14557	33631	13889	6	9	6	SITE1403	CLUST262		chrV	434541	434612	-	tH(GUG)E2	-15	na
chrV	434627	434628	-	18951	47252	36429	4	9	9	SITE1404	CLUST262		chrV	434541	434612	-	tH(GUG)E2	-16	na
chrV	434628	434629	-	0	24077	0	0	3	0	SITE1405	CLUST262		chrV	434541	434612	-	tH(GUG)E2	-17	na
chrV	434629	434630	-	11039	18603	33238	6	9	5	SITE1406	CLUST262		chrV	434541	434612	-	tH(GUG)E2	-18	na
chrV	435835	435836	+	4573	47561	36555	6	15	10	SITE1422	CLUST263		chrV	435752	435824	-	tK(CUU)E2	-11	na
chrV	435837	435838	+	0	0	13701	0	0	3	SITE1426	CLUST263		chrV	435752	435824	-	tK(CUU)E2	-13	na
chrV	435838	435839	-	17821	44356	23785	10	15	9	SITE1429	CLUST263		chrV	435752	435824	-	tK(CUU)E2	-15	na
chrV	435840	435841	-	0	916	16800	0	1	4	SITE1431	CLUST263		chrV	435752	435824	-	tK(CUU)E2	-17	na
chrV	438685	438686	+	1183	3695	21760	2	1	3	SITE1438	CLUST265		chrV	438700	438773	+	tV(AAC)E1	-15	na
chrV	438686	438687	+	44549	46817	178234	9	19	22	SITE1439	CLUST265		chrV	438700	438773	+	tV(AAC)E1	-14	na
chrV	438688	438689	-	1029	5493	11480	2	2	2	SITE1443	CLUST265		chrV	438700	438773	+	tV(AAC)E1	-12	na
chrV	438689	438690	-	74264	43152	50177	12	17	16	SITE1444	CLUST265		chrV	438700	438773	+	tV(AAC)E1	-11	na
chrV	441981	441982	+	68	1260	40332	1	1	6	SITE1451	CLUST267		chrV	441983	442504	+	SCR1	-2	na
chrV	441982	441983	+	18867	18890	85804	10	6	16	SITE1452	CLUST267		chrV	441983	442504	+	SCR1	-1	na
chrV	441984	441985	-	3254	12270	20989	2	6	5	SITE1455	CLUST267		chrV	441983	442504	+	SCR1	0	2
chrV	441985	441986	-	9372	52978	73300	5	13	20	SITE1456	CLUST267		chrV	441983	442504	+	SCR1	0	3
chrV	443286	443287	+	247	5236	1402	1	3	1	SITE1458	CLUST268		chrV	443202	443275	-	tI(AAU)E1	-11	na
chrV	443287	443288	+	18998	16934	13806	9	14	7	SITE1459	CLUST268		chrV	443202	443275	-	tI(AAU)E1	-12	na
chrV	443288	443289	+	0	2525	0	0	1	0	SITE1460	CLUST268		chrV	443202	443275	-	tI(AAU)E1	-13	na
chrV	443287	443288	-	0	4787	0	0	1	0	SITE1461	CLUST268		chrV	443202	443275	-	tI(AAU)E1	-13	na
chrV	443288	443289	-	0	0	10838	0	0	2	SITE1462	CLUST268		chrV	443202	443275	-	tI(AAU)E1	-14	na
chrV	443289	443290	-	0	11933	709	0	6	2	SITE1465	CLUST268		chrV	443202	443275	-	tI(AAU)E1	-15	na
chrV	443290	443291	-	71668	31928	30494	8	11	8	SITE1466	CLUST268		chrV	443202	443275	-	tI(AAU)E1	-16	na
chrV	443291	443292	-	0	3707	0	0	1	0	SITE1467	CLUST268		chrV	443202	443275	-	tI(AAU)E1	-17	na
chrV	469441	469442	+	105342	80216	75932	19	18	21	SITE1478	CLUST275		chrV	469457	469530	+	tV(AAC)E2	-16	na
chrV	469443	469444	+	0	3447	0	0	1	0	SITE1481	CLUST275		chrV	469457	469530	+	tV(AAC)E2	-14	na
chrV	469443	469444	-	333	0	0	1	0	0	SITE1482	CLUST275		chrV	469457	469530	+	tV(AAC)E2	-14	na
chrV	469444	469445	+	0	7301	0	0	1	0	SITE1483	CLUST275		chrV	469457	469530	+	tV(AAC)E2	-13	na
chrV	469444	469445	-	109579	98959	82941	21	26	17	SITE1484	CLUST275		chrV	469457	469530	+	tV(AAC)E2	-13	na
chrV	469445	469446	+	6327	0	0	1	0	0	SITE1485	CLUST275		chrV	469457	469530	+	tV(AAC)E2	-12	na
chrV	469445	469446	-	0	7202	1575	0	2	1	SITE1486	CLUST275		chrV	469457	469530	+	tV(AAC)E2	-12	na
chrV	469446	469447	-	0	0	1140	0	0	1	SITE1488	CLUST275		chrV	469457	469530	+	tV(AAC)E2	-11	na
chrV	487413	487414	+	80	0	0	1	0	0	SITE1492	CLUST276		chrV	487331	487402	-	tE(UUC)E3	-11	na
chrV	487414	487415	+	23856	38673	8386	4	10	3	SITE1494	CLUST276		chrV	487331	487402	-	tE(UUC)E3	-12	na
chrV	487415	487416	+	68	0	0	1	0	0	SITE1495	CLUST276		chrV	487331	487402	-	tE(UUC)E3	-13	na
chrV	487416	487417	-	27563	0	0	1	0	0	SITE1498	CLUST276		chrV	487331	487402	-	tE(UUC)E3	-15	na
chrV	487417	487418	-	6735	3925	26623	2	3	2	SITE1499	CLUST276		chrV	487331	487402	-	tE(UUC)E3	-16	na
chrV	487418	487419	-	6594	0	0	1	0	0	SITE1500	CLUST276		chrV	487331	487402	-	tE(UUC)E3	-17	na
chrV	492435	492436	-	0	0	5354	0	0	1	SITE1505	CLUST277		chrV	492352	492424	-	tR(ACG)E	-12	na
chrV	492437	492438	-	1492	4152	27907	2	3	6	SITE1506	CLUST277		chrV	492352	492424	-	tR(ACG)E	-14	na
chrV	492438	492439	-	0	0	8624	0	0	1	SITE1507	CLUST277		chrV	492352	492424	-	tR(ACG)E	-15	na
chrV	492439	492440	-	68546	79165	187545	22	23	37	SITE1508	CLUST277		chrV	492352	492424	-	tR(ACG)E	-16	na
chrV	492440	492441	-	0	1677	5907	0	1	1	SITE1509	CLUST277		chrV	492352	492424	-	tR(ACG)E	-17	na
chrV	492441	492442	-	0	0	4783	0	0	1	SITE1510	CLUST277		chrV	492352	492424	-	tR(ACG)E	-18	na
chrV	500084	500085	-	0	0	763	0	0	1	SITE1517	CLUST278		chrV	499347	500348	-	YER161C	0	263
chrV	551369	551370	+	4517	12505	20504	2	4	2	SITE1524	CLUST283		chrV	551285	551358	-	tI(AAU)E2	-11	na
chrV	551370	551371	+	58157	50157	25024	8	10	10	SITE1525	CLUST283		chrV	551285	551358	-	tI(AAU)E2	-12	na
chrV	551370	551371	-	67	3673	0	1	1	0	SITE1526	CLUST283		chrV	551285	551358	-	tI(AAU)E2	-13	na
chrV	551371	551372	-	0	0	9047	0	0	1	SITE1528	CLUST283		chrV	551285	551358	-	tI(AAU)E2	-14	na
chrV	551372	551373	-	36046	17407	7049	3	4	2	SITE1529	CLUST283		chrV	551285	551358	-	tI(AAU)E2	-15	na
chrV	551373	551374	-	1041	43118	53291	4	13	7	SITE1530	CLUST283		chrV	551285	551358	-	tI(AAU)E2	-16	na
chrV	551375	551376	-	300	0	0	1	0	0	SITE1532	CLUST283		chrV	551285	551358	-	tI(AAU)E2	-18	na
chrVI	4381	4382	+	80	0	0	1	0	0	SITE1545	CLUST286		chrVI	3322	3846	-	YFL064C	-535	na
chrVI	58479	58480	+	0	0	690	0	0	1	SITE1551	CLUST290		chrVI	58782	62837	+	YFL036W	-303	na
chrVI	65227	65228	-	0	0	12333	0	0	1	SITE1553	CLUST291		chrVI	65477	68698	+	YFL034W	-250	na
chrVI	101358	101359	+	3176	6235	1773	1	4	1	SITE1560	CLUST295		chrVI	101376	101478	+	tP(UGG)F	-18	na
chrVI	101360	101361	+	37755	79101	152573	15	27	32	SITE1562	CLUST295		chrVI	101376	101478	+	tP(UGG)F	-16	na
chrVI	101361	101362	-	12423	0	0	1	0	0	SITE1564	CLUST295		chrVI	101376	101478	+	tP(UGG)F	-15	na
chrVI	101363	101364	-	49271	70391	46336	24	21	17	SITE1568	CLUST295		chrVI	101376	101478	+	tP(UGG)F	-13	na
chrVI	137570	137571	+	0	1219	0	0	1	0	SITE1577	CLUST298		chrVI	137486	137559	-	tN(GUU)F	-11	na
chrVI	137571	137572	+	4013	64385	36435	6	13	10	SITE1578	CLUST298		chrVI	137486	137559	-	tN(GUU)F	-12	na
chrVI	137572	137573	+	0	17120	19372	0	4	1	SITE1580	CLUST298		chrVI	137486	137559	-	tN(GUU)F	-13	na
chrVI	137573	137574	+	0	0	34905	0	0	3	SITE1582	CLUST298		chrVI	137486	137559	-	tN(GUU)F	-14	na
chrVI	137574	137575	-	7155	4114	22658	7	3	6	SITE1586	CLUST298		chrVI	137486	137559	-	tN(GUU)F	-16	na
chrVI	137575	137576	-	0	0	4823	0	0	1	SITE1587	CLUST298		chrVI	137486	137559	-	tN(GUU)F	-17	na
chrVI	137576	137577	-	4866	0	469	1	0	1	SITE1588	CLUST298		chrVI	137486	137559	-	tN(GUU)F	-18	na
chrVI	137577	137578	+	0	0	428	0	0	1	SITE1589	CLUST298		chrVI	137486	137559	-	tN(GUU)F	-18	na
chrVI	158016	158017	+	0	0	4086	0	0	1	SITE1596	CLUST301		chrVI	157916	158007	-	tF(GAA)F	-9	na
chrVI	158017	158018	+	0	1021	221	0	1	1	SITE1597	CLUST301		chrVI	157916	158007	-	tF(GAA)F	-10	na
chrVI	158018	158019	+	0	7199	571	0	4	1	SITE1598	CLUST301		chrVI	157916	158007	-	tF(GAA)F	-11	na
chrVI	158019	158020	+	100179	60311	57384	12	22	15	SITE1600	CLUST301		chrVI	157916	158007	-	tF(GAA)F	-12	na
chrVI	158020	158021	+	11160	6773	0	1	1	0	SITE1601	CLUST301		chrVI	157916	158007	-	tF(GAA)F	-13	na
chrVI	158020	158021	-	5797	0	0	1	0	0	SITE1602	CLUST301		chrVI	157916	158007	-	tF(GAA)F	-14	na
chrVI	158021	158022	-	0	9426	0	0	2	0	SITE1604	CLUST301		chrVI	157916	158007	-	tF(GAA)F	-15	na
chrVI	158022	158023	-	21010	52998	42971	7	21	13	SITE1605	CLUST301		chrVI	157916	158007	-	tF(GAA)F	-16	na
chrVI	158023	158024	-	0	0	12224	0	0	1	SITE1606	CLUST301		chrVI	157916	158007	-	tF(GAA)F	-17	na
chrVI	158358	158359	-	0	0	528	0	0	1	SITE1609	CLUST302		chrVI	157916	158007	-	tF(GAA)F	-352	na
chrVI	162210	162211	+	605	6683	1990	2	3	1	SITE1610	CLUST303		chrVI	162228	162298	+	tG(GCC)F1	-18	na
chrVI	162211	162212	+	37766	31808	51569	17	13	19	SITE1611	CLUST303		chrVI	162228	162298	+	tG(GCC)F1	-17	na
chrVI	162212	162213	+	787	2333	9461	1	3	3	SITE1612	CLUST303		chrVI	162228	162298	+	tG(GCC)F1	-16	na
chrVI	162214	162215	-	48881	81102	60607	12	22	20	SITE1617	CLUST303		chrVI	162228	162298	+	tG(GCC)F1	-14	na
chrVI	162215	162216	-	0	5185	6130	0	4	2	SITE1619	CLUST303		chrVI	162228	162298	+	tG(GCC)F1	-13	na
chrVI	162216	162217	-	0	1009	0	0	1	0	SITE1620	CLUST303		chrVI	162228	162298	+	tG(GCC)F1	-12	na
chrVI	167414	167415	-	0	0	1389	0	0	1	SITE1623	CLUST304		chrVI	167437	167525	+	tY(GUA)F1	-23	na
chrVI	167419	167420	+	203	0	0	1	0	0	SITE1624	CLUST304		chrVI	167437	167525	+	tY(GUA)F1	-18	na
chrVI	167421	167422	+	15917	10300	11614	4	6	2	SITE1626	CLUST304		chrVI	167437	167525	+	tY(GUA)F1	-16	na
chrVI	167422	167423	+	0	1923	0	0	1	0	SITE1627	CLUST304		chrVI	167437	167525	+	tY(GUA)F1	-15	na
chrVI	167423	167424	+	0	1217	217	0	1	1	SITE1628	CLUST304		chrVI	167437	167525	+	tY(GUA)F1	-14	na
chrVI	167424	167425	-	13411	5422	11202	8	7	8	SITE1632	CLUST304		chrVI	167437	167525	+	tY(GUA)F1	-13	na
chrVI	167425	167426	-	0	2298	8973	0	1	1	SITE1633	CLUST304		chrVI	167437	167525	+	tY(GUA)F1	-12	na
chrVI	167430	167431	+	0	1033	0	0	1	0	SITE1635	CLUST304		chrVI	167437	167525	+	tY(GUA)F1	-7	na
chrVI	167433	167434	-	0	5543	0	0	2	0	SITE1637	CLUST304		chrVI	167437	167525	+	tY(GUA)F1	-4	na
chrVI	181049	181050	+	445	0	0	1	0	0	SITE1640	CLUST306		chrVI	180974	181044	-	tG(GCC)F2	-5	na
chrVI	181050	181051	+	243	0	0	1	0	0	SITE1641	CLUST306		chrVI	180974	181044	-	tG(GCC)F2	-6	na
chrVI	181051	181052	+	0	17355	0	0	1	0	SITE1642	CLUST306		chrVI	180974	181044	-	tG(GCC)F2	-7	na
chrVI	181053	181054	+	0	6301	0	0	1	0	SITE1644	CLUST306		chrVI	180974	181044	-	tG(GCC)F2	-9	na
chrVI	181054	181055	+	16572	43747	87571	5	9	17	SITE1645	CLUST306		chrVI	180974	181044	-	tG(GCC)F2	-10	na
chrVI	181055	181056	+	9148	19808	49466	3	3	7	SITE1647	CLUST306		chrVI	180974	181044	-	tG(GCC)F2	-11	na
chrVI	181055	181056	-	510	0	0	1	0	0	SITE1648	CLUST306		chrVI	180974	181044	-	tG(GCC)F2	-12	na
chrVI	181057	181058	+	14661	45160	13009	2	7	2	SITE1650	CLUST306		chrVI	180974	181044	-	tG(GCC)F2	-13	na
chrVI	181057	181058	-	52021	19664	45193	10	7	7	SITE1652	CLUST306		chrVI	180974	181044	-	tG(GCC)F2	-14	na
chrVI	181058	181059	-	2383	2577	53501	3	2	5	SITE1654	CLUST306		chrVI	180974	181044	-	tG(GCC)F2	-15	na
chrVI	181060	181061	-	0	5071	4891	0	2	1	SITE1656	CLUST306		chrVI	180974	181044	-	tG(GCC)F2	-17	na
chrVI	186453	186454	-	16200	0	0	2	0	0	SITE1661	CLUST307		chrVI	184502	191338	+	YFR019W	0	1952
chrVI	191620	191621	+	392	8040	0	1	1	0	SITE1669	CLUST310		chrVI	191513	191613	-	tS(GCU)F	-7	na
chrVI	191621	191622	+	239	0	8115	1	0	3	SITE1670	CLUST310		chrVI	191513	191613	-	tS(GCU)F	-8	na
chrVI	191622	191623	+	0	0	1902	0	0	1	SITE1671	CLUST310		chrVI	191513	191613	-	tS(GCU)F	-9	na
chrVI	191623	191624	+	12920	5274	7465	5	3	4	SITE1673	CLUST310		chrVI	191513	191613	-	tS(GCU)F	-10	na
chrVI	191622	191623	-	1102	0	0	2	0	0	SITE1674	CLUST310		chrVI	191513	191613	-	tS(GCU)F	-10	na
chrVI	191624	191625	+	38206	82885	145806	10	27	28	SITE1675	CLUST310		chrVI	191513	191613	-	tS(GCU)F	-11	na
chrVI	191624	191625	-	5933	455	2132	1	1	2	SITE1677	CLUST310		chrVI	191513	191613	-	tS(GCU)F	-12	na
chrVI	191627	191628	+	0	7658	0	0	2	0	SITE1679	CLUST310		chrVI	191513	191613	-	tS(GCU)F	-14	na
chrVI	191626	191627	-	18455	22400	5587	6	4	2	SITE1680	CLUST310		chrVI	191513	191613	-	tS(GCU)F	-14	na
chrVI	191627	191628	-	15072	53856	75475	13	13	16	SITE1681	CLUST310		chrVI	191513	191613	-	tS(GCU)F	-15	na
chrVI	191628	191629	-	14286	0	2043	1	0	1	SITE1682	CLUST310		chrVI	191513	191613	-	tS(GCU)F	-16	na
chrVI	191629	191630	-	0	1370	573	0	1	2	SITE1683	CLUST310		chrVI	191513	191613	-	tS(GCU)F	-17	na
chrVI	191636	191637	-	4602	0	0	1	0	0	SITE1687	CLUST310		chrVI	191513	191613	-	tS(GCU)F	-24	na
chrVI	196839	196840	+	0	0	2201	0	0	1	SITE1690	CLUST311		chrVI	196833	199034	+	YFR022W	0	6
chrVI	205007	205008	+	809	0	14751	1	0	1	SITE1693	CLUST312		chrVI	204924	204996	-	tA(AGC)F	-11	na
chrVI	205008	205009	+	143199	45964	134604	17	16	17	SITE1694	CLUST312		chrVI	204924	204996	-	tA(AGC)F	-12	na
chrVI	205011	205012	-	4997	28248	58514	5	14	20	SITE1701	CLUST312		chrVI	204924	204996	-	tA(AGC)F	-16	na
chrVI	205013	205014	-	0	6799	0	0	1	0	SITE1703	CLUST312		chrVI	204924	204996	-	tA(AGC)F	-18	na
chrVI	210713	210714	-	0	4415	0	0	1	0	SITE1708	CLUST313		chrVI	210619	210707	-	tY(GUA)F2	-7	na
chrVI	210718	210719	+	0	14082	3669	0	2	1	SITE1709	CLUST313		chrVI	210619	210707	-	tY(GUA)F2	-11	na
chrVI	210719	210720	+	37866	51667	45314	10	15	15	SITE1711	CLUST313		chrVI	210619	210707	-	tY(GUA)F2	-12	na
chrVI	210720	210721	+	10247	10254	8232	5	4	4	SITE1713	CLUST313		chrVI	210619	210707	-	tY(GUA)F2	-13	na
chrVI	210721	210722	-	0	0	10206	0	0	2	SITE1716	CLUST313		chrVI	210619	210707	-	tY(GUA)F2	-15	na
chrVI	210722	210723	-	45474	15738	16439	8	9	9	SITE1717	CLUST313		chrVI	210619	210707	-	tY(GUA)F2	-16	na
chrVI	210723	210724	-	2194	6803	32418	3	4	5	SITE1718	CLUST313		chrVI	210619	210707	-	tY(GUA)F2	-17	na
chrVI	225184	225185	+	1132	0	0	1	0	0	SITE1724	CLUST315		chrVI	225020	225958	-	YFR034C	0	774
chrVI	226769	226770	+	1181	0	0	1	0	0	SITE1725	CLUST316		chrVI	226688	226760	-	tK(CUU)F	-9	na
chrVI	226770	226771	-	0	1306	0	0	1	0	SITE1726	CLUST316		chrVI	226688	226760	-	tK(CUU)F	-11	na
chrVI	226773	226774	+	460	0	0	1	0	0	SITE1727	CLUST316		chrVI	226688	226760	-	tK(CUU)F	-13	na
chrVI	226774	226775	+	143752	59619	149184	26	19	39	SITE1728	CLUST316		chrVI	226688	226760	-	tK(CUU)F	-14	na
chrVI	226776	226777	-	0	0	1951	0	0	1	SITE1733	CLUST316		chrVI	226688	226760	-	tK(CUU)F	-17	na
chrVI	226777	226778	-	121197	61627	85318	28	24	29	SITE1734	CLUST316		chrVI	226688	226760	-	tK(CUU)F	-18	na
chrVII	73910	73911	+	0	0	1063	0	0	2	SITE1747	CLUST319		chrVII	73829	73902	-	tV(AAC)G3	-8	na
chrVII	73911	73912	+	10565	10283	29697	4	4	8	SITE1748	CLUST319		chrVII	73829	73902	-	tV(AAC)G3	-9	na
chrVII	73912	73913	+	12681	20977	15773	5	6	8	SITE1749	CLUST319		chrVII	73829	73902	-	tV(AAC)G3	-10	na
chrVII	73913	73914	+	109031	64639	158496	23	27	30	SITE1750	CLUST319		chrVII	73829	73902	-	tV(AAC)G3	-11	na
chrVII	73912	73913	-	0	0	1582	0	0	1	SITE1751	CLUST319		chrVII	73829	73902	-	tV(AAC)G3	-11	na
chrVII	73914	73915	-	116	9425	14684	1	4	4	SITE1753	CLUST319		chrVII	73829	73902	-	tV(AAC)G3	-13	na
chrVII	73915	73916	-	2422	13842	20206	2	8	9	SITE1754	CLUST319		chrVII	73829	73902	-	tV(AAC)G3	-14	na
chrVII	73916	73917	-	28005	78106	109396	14	27	28	SITE1755	CLUST319		chrVII	73829	73902	-	tV(AAC)G3	-15	na
chrVII	73917	73918	+	0	0	312	0	0	1	SITE1756	CLUST319		chrVII	73829	73902	-	tV(AAC)G3	-15	na
chrVII	73921	73922	+	1122	146	9337	1	1	1	SITE1759	CLUST319		chrVII	73829	73902	-	tV(AAC)G3	-19	na
chrVII	110708	110709	+	4652	26094	9541	9	7	5	SITE1766	CLUST321		chrVII	110625	110696	-	tH(GUG)G1	-12	na
chrVII	110709	110710	+	3657	9998	24849	2	5	10	SITE1768	CLUST321		chrVII	110625	110696	-	tH(GUG)G1	-13	na
chrVII	110710	110711	+	8069	5993	0	1	1	0	SITE1770	CLUST321		chrVII	110625	110696	-	tH(GUG)G1	-14	na
chrVII	110709	110710	-	0	739	0	0	1	0	SITE1771	CLUST321		chrVII	110625	110696	-	tH(GUG)G1	-14	na
chrVII	110711	110712	-	64257	84595	58320	8	14	10	SITE1774	CLUST321		chrVII	110625	110696	-	tH(GUG)G1	-16	na
chrVII	110712	110713	-	1834	6290	15069	4	2	4	SITE1775	CLUST321		chrVII	110625	110696	-	tH(GUG)G1	-17	na
chrVII	111570	111571	+	0	2899	0	0	1	0	SITE1778	CLUST322		chrVII	111700	112005	-	YGL204C	435	na
chrVII	115461	115462	+	11596	0	0	1	0	0	SITE1779	CLUST323		chrVII	115488	115583	+	tK(UUU)G1	-27	na
chrVII	115472	115473	+	17947	14072	30867	5	5	6	SITE1781	CLUST323		chrVII	115488	115583	+	tK(UUU)G1	-16	na
chrVII	115473	115474	+	180	855	9942	1	1	2	SITE1782	CLUST323		chrVII	115488	115583	+	tK(UUU)G1	-15	na
chrVII	115475	115476	-	20040	35706	53452	10	13	15	SITE1787	CLUST323		chrVII	115488	115583	+	tK(UUU)G1	-13	na
chrVII	115476	115477	-	352	0	0	1	0	0	SITE1788	CLUST323		chrVII	115488	115583	+	tK(UUU)G1	-12	na
chrVII	115477	115478	-	0	0	8608	0	0	1	SITE1790	CLUST323		chrVII	115488	115583	+	tK(UUU)G1	-11	na
chrVII	122254	122255	+	64984	82846	120434	17	21	22	SITE1797	CLUST324		chrVII	122269	122341	+	tK(CUU)G1	-15	na
chrVII	122257	122258	-	60330	118590	134304	21	24	22	SITE1801	CLUST324		chrVII	122269	122341	+	tK(CUU)G1	-12	na
chrVII	122258	122259	-	80	0	0	1	0	0	SITE1803	CLUST324		chrVII	122269	122341	+	tK(CUU)G1	-11	na
chrVII	122261	122262	-	1042	0	0	1	0	0	SITE1805	CLUST324		chrVII	122269	122341	+	tK(CUU)G1	-8	na
chrVII	122265	122266	+	0	4423	0	0	1	0	SITE1806	CLUST324		chrVII	122269	122341	+	tK(CUU)G1	-4	na
chrVII	122282	122283	-	0	0	9843	0	0	1	SITE1809	CLUST324		chrVII	122269	122341	+	tK(CUU)G1	0	14
chrVII	166342	166343	-	0	159	0	0	1	0	SITE1820	CLUST328		chrVII	167352	170571	+	YGL178W	-1010	na
chrVII	185798	185799	+	13532	20940	24322	5	11	6	SITE1825	CLUST329		chrVII	185714	185786	-	tK(CUU)G2	-12	na
chrVII	185800	185801	+	0	2000	0	0	1	0	SITE1828	CLUST329		chrVII	185714	185786	-	tK(CUU)G2	-14	na
chrVII	185801	185802	-	37699	108	5103	5	1	3	SITE1832	CLUST329		chrVII	185714	185786	-	tK(CUU)G2	-16	na
chrVII	205504	205505	+	25266	61329	82625	9	14	14	SITE1838	CLUST331		chrVII	205521	205634	+	tL(CAA)G1	-17	na
chrVII	205505	205506	+	1898	3803	2797	2	2	3	SITE1839	CLUST331		chrVII	205521	205634	+	tL(CAA)G1	-16	na
chrVII	205506	205507	+	0	4571	0	0	1	0	SITE1841	CLUST331		chrVII	205521	205634	+	tL(CAA)G1	-15	na
chrVII	205505	205506	-	0	898	20009	0	1	1	SITE1842	CLUST331		chrVII	205521	205634	+	tL(CAA)G1	-16	na
chrVII	205507	205508	-	48629	63574	75627	14	19	9	SITE1844	CLUST331		chrVII	205521	205634	+	tL(CAA)G1	-14	na
chrVII	205508	205509	+	0	4513	0	0	1	0	SITE1845	CLUST331		chrVII	205521	205634	+	tL(CAA)G1	-13	na
chrVII	205508	205509	-	0	125	18103	0	1	2	SITE1846	CLUST331		chrVII	205521	205634	+	tL(CAA)G1	-13	na
chrVII	205509	205510	-	3845	0	158	1	0	1	SITE1847	CLUST331		chrVII	205521	205634	+	tL(CAA)G1	-12	na
chrVII	271593	271594	+	0	0	456	0	0	1	SITE1857	CLUST333		chrVII	270997	272139	+	YGL126W	0	596
chrVII	287339	287340	-	5926	0	0	1	0	0	SITE1861	CLUST335		chrVII	287350	287455	-	tW(CCA)G1	115	na
chrVII	287461	287462	+	3327	1031	2630	2	2	2	SITE1864	CLUST336		chrVII	287350	287455	-	tW(CCA)G1	-6	na
chrVII	287461	287462	-	7302	0	0	1	0	0	SITE1865	CLUST336		chrVII	287350	287455	-	tW(CCA)G1	-7	na
chrVII	287462	287463	+	23899	45376	60395	10	20	15	SITE1866	CLUST336		chrVII	287350	287455	-	tW(CCA)G1	-7	na
chrVII	287463	287464	+	0	0	4236	0	0	2	SITE1867	CLUST336		chrVII	287350	287455	-	tW(CCA)G1	-8	na
chrVII	287464	287465	-	0	440	1924	0	1	1	SITE1868	CLUST336		chrVII	287350	287455	-	tW(CCA)G1	-10	na
chrVII	287465	287466	-	6163	20407	110330	3	11	19	SITE1869	CLUST336		chrVII	287350	287455	-	tW(CCA)G1	-11	na
chrVII	287466	287467	-	0	0	6862	0	0	2	SITE1870	CLUST336		chrVII	287350	287455	-	tW(CCA)G1	-12	na
chrVII	287468	287469	+	174	0	0	1	0	0	SITE1871	CLUST336		chrVII	287350	287455	-	tW(CCA)G1	-13	na
chrVII	299846	299847	+	6162	0	0	1	0	0	SITE1877	CLUST337		chrVII	298178	299728	-	YGL112C	-118	na
chrVII	319762	319763	+	25118	2798	17453	2	2	1	SITE1890	CLUST339		chrVII	319781	319852	+	tH(GUG)G2	-19	na
chrVII	319764	319765	+	72855	66649	117498	17	22	29	SITE1892	CLUST339		chrVII	319781	319852	+	tH(GUG)G2	-17	na
chrVII	319765	319766	-	0	0	13617	0	0	2	SITE1896	CLUST339		chrVII	319781	319852	+	tH(GUG)G2	-16	na
chrVII	319766	319767	+	25756	841	5466	1	1	1	SITE1897	CLUST339		chrVII	319781	319852	+	tH(GUG)G2	-15	na
chrVII	319767	319768	+	11492	0	0	1	0	0	SITE1899	CLUST339		chrVII	319781	319852	+	tH(GUG)G2	-14	na
chrVII	319767	319768	-	102907	70645	164233	20	23	31	SITE1901	CLUST339		chrVII	319781	319852	+	tH(GUG)G2	-14	na
chrVII	321401	321402	+	0	113	0	0	1	0	SITE1907	CLUST340		chrVII	321782	323230	+	YGL097W	-381	na
chrVII	328566	328567	+	0	3965	0	0	2	0	SITE1917	CLUST341		chrVII	328583	328654	+	tE(UUC)G1	-17	na
chrVII	328567	328568	+	22420	32007	41683	9	7	5	SITE1918	CLUST341		chrVII	328583	328654	+	tE(UUC)G1	-16	na
chrVII	328568	328569	+	24649	0	2448	1	0	1	SITE1919	CLUST341		chrVII	328583	328654	+	tE(UUC)G1	-15	na
chrVII	328568	328569	-	0	3848	67	0	2	1	SITE1921	CLUST341		chrVII	328583	328654	+	tE(UUC)G1	-15	na
chrVII	328569	328570	-	0	0	2986	0	0	2	SITE1923	CLUST341		chrVII	328583	328654	+	tE(UUC)G1	-14	na
chrVII	328570	328571	+	0	2350	0	0	1	0	SITE1924	CLUST341		chrVII	328583	328654	+	tE(UUC)G1	-13	na
chrVII	328570	328571	-	353	12662	21176	2	10	5	SITE1925	CLUST341		chrVII	328583	328654	+	tE(UUC)G1	-13	na
chrVII	328571	328572	-	2530	9231	10445	1	3	4	SITE1927	CLUST341		chrVII	328583	328654	+	tE(UUC)G1	-12	na
chrVII	366662	366663	+	262	0	0	1	0	0	SITE1936	CLUST348		chrVII	366925	368088	-	YGL075C	1426	na
chrVII	401608	401609	+	0	1770	0	0	1	0	SITE1944	CLUST351		chrVII	401527	401598	-	tE(UUC)G2	-10	na
chrVII	401610	401611	+	909	2712	17466	1	4	7	SITE1947	CLUST351		chrVII	401527	401598	-	tE(UUC)G2	-12	na
chrVII	401611	401612	+	1130	3620	13266	2	5	13	SITE1948	CLUST351		chrVII	401527	401598	-	tE(UUC)G2	-13	na
chrVII	401612	401613	+	0	391	0	0	2	0	SITE1949	CLUST351		chrVII	401527	401598	-	tE(UUC)G2	-14	na
chrVII	401612	401613	-	0	0	8773	0	0	1	SITE1950	CLUST351		chrVII	401527	401598	-	tE(UUC)G2	-15	na
chrVII	401613	401614	-	19411	21669	44819	7	10	10	SITE1952	CLUST351		chrVII	401527	401598	-	tE(UUC)G2	-16	na
chrVII	401614	401615	-	38867	28946	48385	12	14	13	SITE1954	CLUST351		chrVII	401527	401598	-	tE(UUC)G2	-17	na
chrVII	401615	401616	-	0	1198	258	0	2	1	SITE1955	CLUST351		chrVII	401527	401598	-	tE(UUC)G2	-18	na
chrVII	405437	405438	+	0	2139	0	0	1	0	SITE1958	CLUST352		chrVII	405470	405541	+	tR(UCU)G1	-33	na
chrVII	405451	405452	-	20866	2608	8237	1	1	2	SITE1960	CLUST352		chrVII	405470	405541	+	tR(UCU)G1	-19	na
chrVII	405453	405454	+	0	4255	12800	0	1	2	SITE1962	CLUST352		chrVII	405470	405541	+	tR(UCU)G1	-17	na
chrVII	405454	405455	+	3265	0	0	1	0	0	SITE1963	CLUST352		chrVII	405470	405541	+	tR(UCU)G1	-16	na
chrVII	405455	405456	+	71709	22324	8484	6	6	3	SITE1964	CLUST352		chrVII	405470	405541	+	tR(UCU)G1	-15	na
chrVII	405454	405455	-	0	359	0	0	1	0	SITE1965	CLUST352		chrVII	405470	405541	+	tR(UCU)G1	-16	na
chrVII	405455	405456	-	0	7584	0	0	1	0	SITE1966	CLUST352		chrVII	405470	405541	+	tR(UCU)G1	-15	na
chrVII	405456	405457	+	21742	0	0	1	0	0	SITE1967	CLUST352		chrVII	405470	405541	+	tR(UCU)G1	-14	na
chrVII	405456	405457	-	113	0	1869	1	0	1	SITE1968	CLUST352		chrVII	405470	405541	+	tR(UCU)G1	-14	na
chrVII	405457	405458	+	8865	0	1229	2	0	2	SITE1969	CLUST352		chrVII	405470	405541	+	tR(UCU)G1	-13	na
chrVII	405458	405459	-	61119	30546	49073	7	14	13	SITE1972	CLUST352		chrVII	405470	405541	+	tR(UCU)G1	-12	na
chrVII	405459	405460	-	0	0	14041	0	0	1	SITE1974	CLUST352		chrVII	405470	405541	+	tR(UCU)G1	-11	na
chrVII	405461	405462	+	19066	0	0	1	0	0	SITE1975	CLUST352		chrVII	405470	405541	+	tR(UCU)G1	-9	na
chrVII	405460	405461	-	9040	5481	5390	2	4	1	SITE1976	CLUST352		chrVII	405470	405541	+	tR(UCU)G1	-10	na
chrVII	412378	412379	+	47465	21226	23439	5	3	5	SITE1981	CLUST353		chrVII	412294	412367	-	tV(AAC)G1	-11	na
chrVII	412379	412380	+	14055	6600	30474	2	3	5	SITE1983	CLUST353		chrVII	412294	412367	-	tV(AAC)G1	-12	na
chrVII	412380	412381	+	24413	55759	52380	14	13	10	SITE1984	CLUST353		chrVII	412294	412367	-	tV(AAC)G1	-13	na
chrVII	412381	412382	-	7032	7092	9901	1	4	6	SITE1987	CLUST353		chrVII	412294	412367	-	tV(AAC)G1	-15	na
chrVII	412382	412383	-	366	13374	17057	2	6	4	SITE1989	CLUST353		chrVII	412294	412367	-	tV(AAC)G1	-16	na
chrVII	412383	412384	-	68866	13877	63638	12	8	13	SITE1990	CLUST353		chrVII	412294	412367	-	tV(AAC)G1	-17	na
chrVII	423069	423070	-	238	0	0	1	0	0	SITE1992	CLUST354		chrVII	423092	423205	+	tL(CAA)G2	-23	na
chrVII	423071	423072	-	0	0	4257	0	0	1	SITE1994	CLUST354		chrVII	423092	423205	+	tL(CAA)G2	-21	na
chrVII	423076	423077	+	67214	54569	57608	16	23	16	SITE1996	CLUST354		chrVII	423092	423205	+	tL(CAA)G2	-16	na
chrVII	423078	423079	+	0	7839	0	0	1	0	SITE1998	CLUST354		chrVII	423092	423205	+	tL(CAA)G2	-14	na
chrVII	423079	423080	+	271	0	0	1	0	0	SITE2000	CLUST354		chrVII	423092	423205	+	tL(CAA)G2	-13	na
chrVII	423079	423080	-	60333	116881	121890	19	36	36	SITE2002	CLUST354		chrVII	423092	423205	+	tL(CAA)G2	-13	na
chrVII	423081	423082	-	430	4337	4239	1	3	1	SITE2005	CLUST354		chrVII	423092	423205	+	tL(CAA)G2	-11	na
chrVII	423082	423083	-	0	0	3789	0	0	1	SITE2008	CLUST354		chrVII	423092	423205	+	tL(CAA)G2	-10	na
chrVII	440815	440816	+	0	0	3901	0	0	1	SITE2012	CLUST357		chrVII	440716	440807	-	tF(GAA)G	-8	na
chrVII	440818	440819	-	0	157	5434	0	1	1	SITE2014	CLUST357		chrVII	440716	440807	-	tF(GAA)G	-12	na
chrVII	440819	440820	+	3105	0	0	1	0	0	SITE2015	CLUST357		chrVII	440716	440807	-	tF(GAA)G	-12	na
chrVII	440820	440821	+	97456	43101	63058	12	17	18	SITE2016	CLUST357		chrVII	440716	440807	-	tF(GAA)G	-13	na
chrVII	440821	440822	+	0	1356	14078	0	1	1	SITE2017	CLUST357		chrVII	440716	440807	-	tF(GAA)G	-14	na
chrVII	440822	440823	+	0	2528	105	0	1	1	SITE2019	CLUST357		chrVII	440716	440807	-	tF(GAA)G	-15	na
chrVII	440822	440823	-	0	0	303	0	0	1	SITE2020	CLUST357		chrVII	440716	440807	-	tF(GAA)G	-16	na
chrVII	440823	440824	-	22895	16765	51220	12	10	18	SITE2021	CLUST357		chrVII	440716	440807	-	tF(GAA)G	-17	na
chrVII	440824	440825	-	0	0	3580	0	0	2	SITE2022	CLUST357		chrVII	440716	440807	-	tF(GAA)G	-18	na
chrVII	459787	459788	-	2105	0	0	1	0	0	SITE2027	CLUST360		chrVII	459854	461365	+	YGL017W	-67	na
chrVII	472799	472800	-	24306	0	0	1	0	0	SITE2028	CLUST361		chrVII	472855	474276	+	YGL012W	-56	na
chrVII	531592	531593	+	18099	6872	5497	2	4	2	SITE2033	CLUST364		chrVII	531610	531681	+	tD(GUC)G1	-18	na
chrVII	531594	531595	+	0	0	12133	0	0	1	SITE2035	CLUST364		chrVII	531610	531681	+	tD(GUC)G1	-16	na
chrVII	531595	531596	+	0	3189	6512	0	1	2	SITE2036	CLUST364		chrVII	531610	531681	+	tD(GUC)G1	-15	na
chrVII	531595	531596	-	272	13634	13055	2	4	5	SITE2038	CLUST364		chrVII	531610	531681	+	tD(GUC)G1	-15	na
chrVII	531596	531597	+	0	0	2329	0	0	1	SITE2039	CLUST364		chrVII	531610	531681	+	tD(GUC)G1	-14	na
chrVII	531596	531597	-	0	0	9610	0	0	1	SITE2040	CLUST364		chrVII	531610	531681	+	tD(GUC)G1	-14	na
chrVII	531597	531598	+	40532	53288	90599	8	15	20	SITE2041	CLUST364		chrVII	531610	531681	+	tD(GUC)G1	-13	na
chrVII	531597	531598	-	0	3720	0	0	1	0	SITE2043	CLUST364		chrVII	531610	531681	+	tD(GUC)G1	-13	na
chrVII	531598	531599	-	203	2823	3923	1	1	2	SITE2044	CLUST364		chrVII	531610	531681	+	tD(GUC)G1	-12	na
chrVII	531600	531601	-	104398	38013	59305	15	12	15	SITE2047	CLUST364		chrVII	531610	531681	+	tD(GUC)G1	-10	na
chrVII	535621	535622	+	0	546	0	0	2	0	SITE2051	CLUST366		chrVII	536057	537379	+	YGR027W-A	-436	na
chrVII	541834	541835	+	2189	16034	6207	3	4	3	SITE2052	CLUST367		chrVII	541850	541921	+	tE(UUC)G3	-16	na
chrVII	541835	541836	+	0	4179	0	0	1	0	SITE2053	CLUST367		chrVII	541850	541921	+	tE(UUC)G3	-15	na
chrVII	541837	541838	-	9185	6796	11097	4	3	2	SITE2055	CLUST367		chrVII	541850	541921	+	tE(UUC)G3	-13	na
chrVII	541838	541839	-	0	8003	0	0	2	0	SITE2056	CLUST367		chrVII	541850	541921	+	tE(UUC)G3	-12	na
chrVII	541839	541840	-	130	0	9550	1	0	1	SITE2057	CLUST367		chrVII	541850	541921	+	tE(UUC)G3	-11	na
chrVII	544659	544660	+	2243	16764	7967	2	3	1	SITE2059	CLUST368		chrVII	544577	544648	-	tD(GUC)G2	-11	na
chrVII	544660	544661	+	29580	47190	94358	3	6	17	SITE2061	CLUST368		chrVII	544577	544648	-	tD(GUC)G2	-12	na
chrVII	544659	544660	-	0	0	12250	0	0	1	SITE2062	CLUST368		chrVII	544577	544648	-	tD(GUC)G2	-12	na
chrVII	544661	544662	+	0	4701	0	0	1	0	SITE2064	CLUST368		chrVII	544577	544648	-	tD(GUC)G2	-13	na
chrVII	544662	544663	+	50454	2855	11760	5	2	3	SITE2065	CLUST368		chrVII	544577	544648	-	tD(GUC)G2	-14	na
chrVII	544662	544663	-	1309	12613	2364	2	3	1	SITE2067	CLUST368		chrVII	544577	544648	-	tD(GUC)G2	-15	na
chrVII	544663	544664	-	18592	47279	53869	3	8	8	SITE2069	CLUST368		chrVII	544577	544648	-	tD(GUC)G2	-16	na
chrVII	544664	544665	-	295	1724	0	1	1	0	SITE2071	CLUST368		chrVII	544577	544648	-	tD(GUC)G2	-17	na
chrVII	544665	544666	-	28554	27998	50599	7	7	10	SITE2072	CLUST368		chrVII	544577	544648	-	tD(GUC)G2	-18	na
chrVII	544668	544669	+	0	417	915	0	1	1	SITE2073	CLUST368		chrVII	544577	544648	-	tD(GUC)G2	-20	na
chrVII	555223	555224	+	0	1428	348	0	1	1	SITE2076	CLUST369		chrVII	555228	555229	+	iYGR033C	-5	na
chrVII	555225	555226	+	0	233	0	0	1	0	SITE2078	CLUST369		chrVII	555228	555229	+	iYGR033C	-3	na
chrVII	555229	555230	-	0	0	80	0	0	1	SITE2080	CLUST369		chrVII	555228	555229	+	iYGR033C	1	na
chrVII	561747	561748	+	0	66	0	0	1	0	SITE2087	CLUST370		chrVII	561662	561743	-	tS(AGA)G	-4	na
chrVII	561751	561752	+	195	0	0	1	0	0	SITE2088	CLUST370		chrVII	561662	561743	-	tS(AGA)G	-8	na
chrVII	561752	561753	+	88	0	0	1	0	0	SITE2089	CLUST370		chrVII	561662	561743	-	tS(AGA)G	-9	na
chrVII	561753	561754	-	23280	0	0	1	0	0	SITE2091	CLUST370		chrVII	561662	561743	-	tS(AGA)G	-11	na
chrVII	561754	561755	+	5570	11207	991	3	3	2	SITE2092	CLUST370		chrVII	561662	561743	-	tS(AGA)G	-11	na
chrVII	561755	561756	+	25503	6237	29275	6	5	8	SITE2094	CLUST370		chrVII	561662	561743	-	tS(AGA)G	-12	na
chrVII	561756	561757	+	1163	1194	1992	2	2	3	SITE2095	CLUST370		chrVII	561662	561743	-	tS(AGA)G	-13	na
chrVII	561757	561758	+	1143	3595	6819	2	4	3	SITE2096	CLUST370		chrVII	561662	561743	-	tS(AGA)G	-14	na
chrVII	561757	561758	-	0	13484	1032	0	2	2	SITE2098	CLUST370		chrVII	561662	561743	-	tS(AGA)G	-15	na
chrVII	561758	561759	-	8882	1961	19688	3	2	4	SITE2099	CLUST370		chrVII	561662	561743	-	tS(AGA)G	-16	na
chrVII	561759	561760	-	7003	3917	5101	1	4	2	SITE2101	CLUST370		chrVII	561662	561743	-	tS(AGA)G	-17	na
chrVII	561760	561761	-	12020	3741	5972	2	4	4	SITE2102	CLUST370		chrVII	561662	561743	-	tS(AGA)G	-18	na
chrVII	584608	584609	+	2653	0	0	1	0	0	SITE2104	CLUST371		chrVII	584895	586052	+	YGR046W	-287	na
chrVII	661729	661730	+	0	0	1603	0	0	1	SITE2120	CLUST377		chrVII	661749	661820	+	tT(UGU)G1	-20	na
chrVII	661731	661732	+	128	0	0	1	0	0	SITE2121	CLUST377		chrVII	661749	661820	+	tT(UGU)G1	-18	na
chrVII	661733	661734	+	29140	40124	47534	11	21	22	SITE2124	CLUST377		chrVII	661749	661820	+	tT(UGU)G1	-16	na
chrVII	661732	661733	-	0	10688	9958	0	3	2	SITE2125	CLUST377		chrVII	661749	661820	+	tT(UGU)G1	-17	na
chrVII	661734	661735	+	150	0	0	1	0	0	SITE2126	CLUST377		chrVII	661749	661820	+	tT(UGU)G1	-15	na
chrVII	661737	661738	+	0	0	2546	0	0	1	SITE2130	CLUST377		chrVII	661749	661820	+	tT(UGU)G1	-12	na
chrVII	661736	661737	-	46797	66968	85004	13	28	23	SITE2131	CLUST377		chrVII	661749	661820	+	tT(UGU)G1	-13	na
chrVII	661737	661738	-	17946	0	0	1	0	0	SITE2132	CLUST377		chrVII	661749	661820	+	tT(UGU)G1	-12	na
chrVII	700654	700655	+	0	2067	0	0	1	0	SITE2134	CLUST379		chrVII	700675	700756	+	tL(GAG)G	-21	na
chrVII	700655	700656	+	0	216	9921	0	1	1	SITE2135	CLUST379		chrVII	700675	700756	+	tL(GAG)G	-20	na
chrVII	700656	700657	+	0	198	0	0	1	0	SITE2136	CLUST379		chrVII	700675	700756	+	tL(GAG)G	-19	na
chrVII	700657	700658	+	63078	25661	87988	11	7	13	SITE2138	CLUST379		chrVII	700675	700756	+	tL(GAG)G	-18	na
chrVII	700656	700657	-	1484	0	0	1	0	0	SITE2139	CLUST379		chrVII	700675	700756	+	tL(GAG)G	-19	na
chrVII	700657	700658	-	0	15913	677	0	2	1	SITE2140	CLUST379		chrVII	700675	700756	+	tL(GAG)G	-18	na
chrVII	700658	700659	+	105764	94896	61128	18	25	25	SITE2141	CLUST379		chrVII	700675	700756	+	tL(GAG)G	-17	na
chrVII	700659	700660	+	812	10717	29326	1	4	5	SITE2143	CLUST379		chrVII	700675	700756	+	tL(GAG)G	-16	na
chrVII	700659	700660	-	17301	285	7176	2	1	1	SITE2144	CLUST379		chrVII	700675	700756	+	tL(GAG)G	-16	na
chrVII	700660	700661	+	0	0	16616	0	0	1	SITE2145	CLUST379		chrVII	700675	700756	+	tL(GAG)G	-15	na
chrVII	700660	700661	-	28803	48938	44190	9	15	12	SITE2146	CLUST379		chrVII	700675	700756	+	tL(GAG)G	-15	na
chrVII	700661	700662	+	0	865	0	0	1	0	SITE2147	CLUST379		chrVII	700675	700756	+	tL(GAG)G	-14	na
chrVII	700662	700663	+	1482	0	6592	2	0	1	SITE2148	CLUST379		chrVII	700675	700756	+	tL(GAG)G	-13	na
chrVII	700661	700662	-	148205	76950	63482	30	29	20	SITE2149	CLUST379		chrVII	700675	700756	+	tL(GAG)G	-14	na
chrVII	700662	700663	-	10278	3565	36785	3	4	7	SITE2150	CLUST379		chrVII	700675	700756	+	tL(GAG)G	-13	na
chrVII	700663	700664	-	1680	1209	1004	2	1	1	SITE2151	CLUST379		chrVII	700675	700756	+	tL(GAG)G	-12	na
chrVII	700664	700665	-	16572	0	0	1	0	0	SITE2152	CLUST379		chrVII	700675	700756	+	tL(GAG)G	-11	na
chrVII	701052	701053	-	0	2033	0	0	1	0	SITE2156	CLUST380		chrVII	700953	701048	-	tK(UUU)G2	-5	na
chrVII	701057	701058	+	0	50	0	0	1	0	SITE2158	CLUST380		chrVII	700953	701048	-	tK(UUU)G2	-9	na
chrVII	701058	701059	+	14348	0	0	2	0	0	SITE2159	CLUST380		chrVII	700953	701048	-	tK(UUU)G2	-10	na
chrVII	701060	701061	+	54662	61582	99167	17	28	25	SITE2163	CLUST380		chrVII	700953	701048	-	tK(UUU)G2	-12	na
chrVII	701060	701061	-	0	1039	0	0	1	0	SITE2164	CLUST380		chrVII	700953	701048	-	tK(UUU)G2	-13	na
chrVII	701061	701062	-	0	2357	991	0	2	1	SITE2167	CLUST380		chrVII	700953	701048	-	tK(UUU)G2	-14	na
chrVII	701063	701064	-	26062	71561	44028	16	28	17	SITE2170	CLUST380		chrVII	700953	701048	-	tK(UUU)G2	-16	na
chrVII	701068	701069	+	0	0	756	0	0	1	SITE2173	CLUST380		chrVII	700953	701048	-	tK(UUU)G2	-20	na
chrVII	707188	707189	+	503	1172	0	1	1	0	SITE2177	CLUST381		chrVII	707108	707179	-	tC(GCA)G	-9	na
chrVII	707190	707191	+	865	1382	29081	3	2	11	SITE2179	CLUST381		chrVII	707108	707179	-	tC(GCA)G	-11	na
chrVII	707191	707192	+	0	50	7014	0	1	1	SITE2180	CLUST381		chrVII	707108	707179	-	tC(GCA)G	-12	na
chrVII	707193	707194	-	59854	20465	29850	9	11	12	SITE2184	CLUST381		chrVII	707108	707179	-	tC(GCA)G	-15	na
chrVII	707194	707195	-	63	9743	6240	1	3	2	SITE2185	CLUST381		chrVII	707108	707179	-	tC(GCA)G	-16	na
chrVII	707195	707196	-	0	6025	0	0	1	0	SITE2186	CLUST381		chrVII	707108	707179	-	tC(GCA)G	-17	na
chrVII	707534	707535	+	0	0	4026	0	0	1	SITE2190	CLUST382		chrVII	707610	712254	+	YGR109W-B	-76	na
chrVII	707535	707536	+	14482	133689	121109	24	68	83	SITE2191	CLUST382		chrVII	707610	712254	+	YGR109W-B	-75	na
chrVII	707761	707762	+	857	0	198	1	0	1	SITE2199	CLUST385		chrVII	707610	708482	+	YGR109W-A	0	151
chrVII	707934	707935	-	0	0	1301	0	0	1	SITE2204	CLUST388		chrVII	707610	708482	+	YGR109W-A	0	325
chrVII	708079	708080	-	0	0	3871	0	0	1	SITE2206	CLUST389		chrVII	707610	708482	+	YGR109W-A	0	470
chrVII	708092	708093	-	0	0	2832	0	0	1	SITE2207	CLUST389		chrVII	707610	708482	+	YGR109W-A	0	483
chrVII	708778	708779	+	0	0	591	0	0	1	SITE2219	CLUST394		chrVII	707610	712254	+	YGR109W-B	0	1168
chrVII	708836	708837	+	729	3716	16501	2	4	3	SITE2224	CLUST395		chrVII	707610	712254	+	YGR109W-B	0	1226
chrVII	708967	708968	-	0	0	9265	0	0	1	SITE2230	CLUST396		chrVII	707610	712254	+	YGR109W-B	0	1358
chrVII	709410	709411	+	0	0	15845	0	0	1	SITE2239	CLUST399		chrVII	707610	712254	+	YGR109W-B	0	1800
chrVII	709589	709590	-	79202	77900	80852	7	13	16	SITE2247	CLUST402		chrVII	707610	712254	+	YGR109W-B	0	1980
chrVII	709853	709854	-	0	0	21630	0	0	1	SITE2256	CLUST405		chrVII	707610	712254	+	YGR109W-B	0	2244
chrVII	710308	710309	-	422	0	0	1	0	0	SITE2258	CLUST407		chrVII	707610	712254	+	YGR109W-B	0	2699
chrVII	711060	711061	-	0	89	1114	0	1	1	SITE2271	CLUST412		chrVII	707610	712254	+	YGR109W-B	0	3451
chrVII	711121	711122	-	0	0	1214	0	0	1	SITE2279	CLUST413		chrVII	707610	712254	+	YGR109W-B	0	3512
chrVII	711230	711231	-	5028	0	0	1	0	0	SITE2280	CLUST414		chrVII	707610	712254	+	YGR109W-B	0	3621
chrVII	711245	711246	+	250	0	0	1	0	0	SITE2281	CLUST414		chrVII	707610	712254	+	YGR109W-B	0	3635
chrVII	711252	711253	-	0	0	1958	0	0	1	SITE2282	CLUST414		chrVII	707610	712254	+	YGR109W-B	0	3643
chrVII	711762	711763	+	0	0	151	0	0	1	SITE2293	CLUST418		chrVII	707610	712254	+	YGR109W-B	0	4152
chrVII	712204	712205	-	265	4297	6014	1	2	1	SITE2308	CLUST423		chrVII	707610	712254	+	YGR109W-B	0	4595
chrVII	712546	712547	+	0	4566	0	0	2	0	SITE2309	CLUST424		chrVII	707610	712254	+	YGR109W-B	293	na
chrVII	731120	731121	+	0	1146	297	0	1	2	SITE2315	CLUST426		chrVII	731137	731210	+	tN(GUU)G	-17	na
chrVII	731121	731122	+	21857	6197	20087	1	5	4	SITE2316	CLUST426		chrVII	731137	731210	+	tN(GUU)G	-16	na
chrVII	731122	731123	+	18598	6531	1764	2	3	2	SITE2317	CLUST426		chrVII	731137	731210	+	tN(GUU)G	-15	na
chrVII	731123	731124	+	0	0	2044	0	0	1	SITE2318	CLUST426		chrVII	731137	731210	+	tN(GUU)G	-14	na
chrVII	731123	731124	-	8726	1029	733	4	1	1	SITE2319	CLUST426		chrVII	731137	731210	+	tN(GUU)G	-14	na
chrVII	731124	731125	+	0	525	0	0	1	0	SITE2320	CLUST426		chrVII	731137	731210	+	tN(GUU)G	-13	na
chrVII	731124	731125	-	9759	19128	4692	8	10	3	SITE2321	CLUST426		chrVII	731137	731210	+	tN(GUU)G	-13	na
chrVII	731125	731126	-	7584	31696	44369	4	7	9	SITE2323	CLUST426		chrVII	731137	731210	+	tN(GUU)G	-12	na
chrVII	731126	731127	-	0	1741	0	0	1	0	SITE2324	CLUST426		chrVII	731137	731210	+	tN(GUU)G	-11	na
chrVII	736321	736322	+	3417	0	11767	2	0	2	SITE2333	CLUST427		chrVII	736340	736411	+	tR(UCU)G3	-19	na
chrVII	736322	736323	+	23264	57131	59649	6	9	11	SITE2334	CLUST427		chrVII	736340	736411	+	tR(UCU)G3	-18	na
chrVII	736323	736324	+	68481	87296	47020	13	20	12	SITE2335	CLUST427		chrVII	736340	736411	+	tR(UCU)G3	-17	na
chrVII	736324	736325	+	529	0	0	1	0	0	SITE2336	CLUST427		chrVII	736340	736411	+	tR(UCU)G3	-16	na
chrVII	739105	739106	+	0	555	310	0	1	1	SITE2342	CLUST428		chrVII	739122	739195	+	tI(AAU)G	-17	na
chrVII	739107	739108	+	44950	20909	40535	3	4	4	SITE2344	CLUST428		chrVII	739122	739195	+	tI(AAU)G	-15	na
chrVII	739108	739109	-	749	0	0	2	0	0	SITE2346	CLUST428		chrVII	739122	739195	+	tI(AAU)G	-14	na
chrVII	739109	739110	-	0	15838	7670	0	3	2	SITE2348	CLUST428		chrVII	739122	739195	+	tI(AAU)G	-13	na
chrVII	739110	739111	+	0	1259	0	0	1	0	SITE2349	CLUST428		chrVII	739122	739195	+	tI(AAU)G	-12	na
chrVII	739110	739111	-	9373	43806	23879	3	9	9	SITE2350	CLUST428		chrVII	739122	739195	+	tI(AAU)G	-12	na
chrVII	739112	739113	-	0	0	4228	0	0	1	SITE2353	CLUST428		chrVII	739122	739195	+	tI(AAU)G	-10	na
chrVII	739666	739667	+	13288	0	0	1	0	0	SITE2357	CLUST429		chrVII	739944	741662	+	YGR124W	-278	na
chrVII	774332	774333	+	0	9562	0	0	1	0	SITE2361	CLUST431		chrVII	774349	774421	+	tA(AGC)G	-17	na
chrVII	774334	774335	+	45317	20551	40072	8	10	11	SITE2363	CLUST431		chrVII	774349	774421	+	tA(AGC)G	-15	na
chrVII	774334	774335	-	0	4800	15374	0	1	1	SITE2365	CLUST431		chrVII	774349	774421	+	tA(AGC)G	-15	na
chrVII	774335	774336	+	0	127	29836	0	1	8	SITE2366	CLUST431		chrVII	774349	774421	+	tA(AGC)G	-14	na
chrVII	774336	774337	+	1693	0	0	1	0	0	SITE2367	CLUST431		chrVII	774349	774421	+	tA(AGC)G	-13	na
chrVII	774336	774337	-	7291	890	1640	3	1	1	SITE2368	CLUST431		chrVII	774349	774421	+	tA(AGC)G	-13	na
chrVII	774337	774338	-	32924	58559	47440	8	16	17	SITE2369	CLUST431		chrVII	774349	774421	+	tA(AGC)G	-12	na
chrVII	774338	774339	-	3410	6599	19706	3	5	7	SITE2371	CLUST431		chrVII	774349	774421	+	tA(AGC)G	-11	na
chrVII	774339	774340	-	21823	0	2029	2	0	1	SITE2372	CLUST431		chrVII	774349	774421	+	tA(AGC)G	-10	na
chrVII	779598	779599	+	0	0	35737	0	0	3	SITE2375	CLUST432		chrVII	779616	779687	+	tG(UCC)G	-18	na
chrVII	779599	779600	+	57124	42048	159856	15	16	34	SITE2376	CLUST432		chrVII	779616	779687	+	tG(UCC)G	-17	na
chrVII	779600	779601	+	24428	35875	280	2	6	1	SITE2377	CLUST432		chrVII	779616	779687	+	tG(UCC)G	-16	na
chrVII	779600	779601	-	0	0	2396	0	0	1	SITE2379	CLUST432		chrVII	779616	779687	+	tG(UCC)G	-16	na
chrVII	779601	779602	+	12218	0	0	1	0	0	SITE2380	CLUST432		chrVII	779616	779687	+	tG(UCC)G	-15	na
chrVII	779601	779602	-	7480	1547	10789	4	3	4	SITE2381	CLUST432		chrVII	779616	779687	+	tG(UCC)G	-15	na
chrVII	779602	779603	-	47383	58783	105190	18	26	27	SITE2382	CLUST432		chrVII	779616	779687	+	tG(UCC)G	-14	na
chrVII	779603	779604	-	2546	28336	14373	3	6	5	SITE2383	CLUST432		chrVII	779616	779687	+	tG(UCC)G	-13	na
chrVII	779604	779605	-	0	20685	0	0	2	0	SITE2385	CLUST432		chrVII	779616	779687	+	tG(UCC)G	-12	na
chrVII	794399	794400	+	0	0	6063	0	0	1	SITE2390	CLUST434		chrVII	794417	794489	+	tA(UGC)G	-18	na
chrVII	794400	794401	+	679	1435	14528	1	1	1	SITE2391	CLUST434		chrVII	794417	794489	+	tA(UGC)G	-17	na
chrVII	794401	794402	+	9839	14967	58394	6	9	10	SITE2392	CLUST434		chrVII	794417	794489	+	tA(UGC)G	-16	na
chrVII	794402	794403	+	597	0	0	1	0	0	SITE2393	CLUST434		chrVII	794417	794489	+	tA(UGC)G	-15	na
chrVII	794402	794403	-	84	0	0	1	0	0	SITE2394	CLUST434		chrVII	794417	794489	+	tA(UGC)G	-15	na
chrVII	794403	794404	+	112	0	0	1	0	0	SITE2395	CLUST434		chrVII	794417	794489	+	tA(UGC)G	-14	na
chrVII	794403	794404	-	0	478	0	0	1	0	SITE2396	CLUST434		chrVII	794417	794489	+	tA(UGC)G	-14	na
chrVII	794404	794405	+	0	0	1765	0	0	1	SITE2397	CLUST434		chrVII	794417	794489	+	tA(UGC)G	-13	na
chrVII	794404	794405	-	37541	33822	10390	6	13	5	SITE2398	CLUST434		chrVII	794417	794489	+	tA(UGC)G	-13	na
chrVII	794405	794406	-	0	0	6349	0	0	2	SITE2399	CLUST434		chrVII	794417	794489	+	tA(UGC)G	-12	na
chrVII	794406	794407	-	0	5208	1278	0	2	1	SITE2400	CLUST434		chrVII	794417	794489	+	tA(UGC)G	-11	na
chrVII	823464	823465	-	0	2749	0	0	1	0	SITE2408	CLUST437		chrVII	823482	823555	+	tV(AAC)G2	-18	na
chrVII	823466	823467	+	62561	58278	72819	20	24	17	SITE2410	CLUST437		chrVII	823482	823555	+	tV(AAC)G2	-16	na
chrVII	823468	823469	+	129	0	0	1	0	0	SITE2412	CLUST437		chrVII	823482	823555	+	tV(AAC)G2	-14	na
chrVII	823469	823470	-	154354	156871	257244	34	34	35	SITE2414	CLUST437		chrVII	823482	823555	+	tV(AAC)G2	-13	na
chrVII	823470	823471	-	0	0	8068	0	0	1	SITE2416	CLUST437		chrVII	823482	823555	+	tV(AAC)G2	-12	na
chrVII	823471	823472	-	0	0	15860	0	0	1	SITE2417	CLUST437		chrVII	823482	823555	+	tV(AAC)G2	-11	na
chrVII	823473	823474	-	0	1933	0	0	1	0	SITE2418	CLUST437		chrVII	823482	823555	+	tV(AAC)G2	-9	na
chrVII	828804	828805	-	0	0	2322	0	0	1	SITE2421	CLUST439		chrVII	828625	828960	+	YGR164W	0	180
chrVII	828805	828806	+	0	0	573	0	0	1	SITE2422	CLUST439		chrVII	828625	828960	+	YGR164W	0	180
chrVII	828806	828807	+	0	0	4747	0	0	1	SITE2423	CLUST439		chrVII	828625	828960	+	YGR164W	0	181
chrVII	828807	828808	+	5470	410	0	2	1	0	SITE2425	CLUST439		chrVII	828625	828960	+	YGR164W	0	182
chrVII	828808	828809	-	206	3982	1888	1	3	1	SITE2427	CLUST439		chrVII	828625	828960	+	YGR164W	0	184
chrVII	828809	828810	-	548	0	427	2	0	1	SITE2428	CLUST439		chrVII	828625	828960	+	YGR164W	0	185
chrVII	828810	828811	-	17891	1003	1521	2	1	1	SITE2429	CLUST439		chrVII	828625	828960	+	YGR164W	0	186
chrVII	845631	845632	+	40213	57984	88499	15	26	21	SITE2443	CLUST441		chrVII	845649	845719	+	tG(GCC)G1	-18	na
chrVII	845632	845633	+	2757	0	0	3	0	0	SITE2444	CLUST441		chrVII	845649	845719	+	tG(GCC)G1	-17	na
chrVII	845633	845634	+	0	62	0	0	1	0	SITE2446	CLUST441		chrVII	845649	845719	+	tG(GCC)G1	-16	na
chrVII	845634	845635	-	1741	2046	1374	4	4	6	SITE2449	CLUST441		chrVII	845649	845719	+	tG(GCC)G1	-15	na
chrVII	845635	845636	+	0	1087	0	0	2	0	SITE2450	CLUST441		chrVII	845649	845719	+	tG(GCC)G1	-14	na
chrVII	845635	845636	-	0	55	103	0	1	1	SITE2451	CLUST441		chrVII	845649	845719	+	tG(GCC)G1	-14	na
chrVII	845637	845638	+	0	4827	0	0	2	0	SITE2453	CLUST441		chrVII	845649	845719	+	tG(GCC)G1	-12	na
chrVII	845639	845640	+	0	0	15443	0	0	3	SITE2455	CLUST441		chrVII	845649	845719	+	tG(GCC)G1	-10	na
chrVII	845640	845641	-	0	286	1453	0	2	2	SITE2457	CLUST441		chrVII	845649	845719	+	tG(GCC)G1	-9	na
chrVII	855092	855093	+	472	0	0	1	0	0	SITE2460	CLUST443		chrVII	855264	856301	-	YGR180C	1209	na
chrVII	857498	857499	+	0	0	10403	0	0	1	SITE2463	CLUST444		chrVII	857378	857491	-	tL(CAA)G3	-7	na
chrVII	857501	857502	+	0	0	12431	0	0	1	SITE2466	CLUST444		chrVII	857378	857491	-	tL(CAA)G3	-10	na
chrVII	857503	857504	+	69207	101129	136774	21	30	27	SITE2470	CLUST444		chrVII	857378	857491	-	tL(CAA)G3	-12	na
chrVII	857504	857505	-	296	0	0	2	0	0	SITE2474	CLUST444		chrVII	857378	857491	-	tL(CAA)G3	-14	na
chrVII	857505	857506	-	0	5339	3858	0	2	1	SITE2475	CLUST444		chrVII	857378	857491	-	tL(CAA)G3	-15	na
chrVII	857506	857507	-	47961	35549	91555	17	25	27	SITE2476	CLUST444		chrVII	857378	857491	-	tL(CAA)G3	-16	na
chrVII	876369	876370	+	0	312	0	0	1	0	SITE2484	CLUST446		chrVII	876394	876466	+	tK(CUU)G3	-25	na
chrVII	876372	876373	-	0	0	12981	0	0	2	SITE2487	CLUST446		chrVII	876394	876466	+	tK(CUU)G3	-22	na
chrVII	876377	876378	+	77463	48804	75770	20	28	18	SITE2489	CLUST446		chrVII	876394	876466	+	tK(CUU)G3	-17	na
chrVII	876379	876380	+	21795	0	0	1	0	0	SITE2491	CLUST446		chrVII	876394	876466	+	tK(CUU)G3	-15	na
chrVII	876380	876381	+	0	1185	0	0	1	0	SITE2492	CLUST446		chrVII	876394	876466	+	tK(CUU)G3	-14	na
chrVII	876379	876380	-	120	0	0	1	0	0	SITE2493	CLUST446		chrVII	876394	876466	+	tK(CUU)G3	-15	na
chrVII	876380	876381	-	73536	95697	114226	19	33	35	SITE2494	CLUST446		chrVII	876394	876466	+	tK(CUU)G3	-14	na
chrVII	876383	876384	-	0	405	447	0	1	1	SITE2497	CLUST446		chrVII	876394	876466	+	tK(CUU)G3	-11	na
chrVII	876385	876386	+	10116	0	0	1	0	0	SITE2498	CLUST446		chrVII	876394	876466	+	tK(CUU)G3	-9	na
chrVII	878820	878821	+	0	1552	0	0	1	0	SITE2503	CLUST448		chrVII	878710	878815	-	tW(CCA)G2	-5	na
chrVII	878821	878822	+	321	4512	6971	1	3	3	SITE2505	CLUST448		chrVII	878710	878815	-	tW(CCA)G2	-6	na
chrVII	878822	878823	+	35663	88931	79922	17	24	20	SITE2507	CLUST448		chrVII	878710	878815	-	tW(CCA)G2	-7	na
chrVII	878823	878824	+	0	25390	4650	0	3	2	SITE2508	CLUST448		chrVII	878710	878815	-	tW(CCA)G2	-8	na
chrVII	878824	878825	-	9653	0	1259	2	0	1	SITE2510	CLUST448		chrVII	878710	878815	-	tW(CCA)G2	-10	na
chrVII	878825	878826	-	14154	33529	32937	11	23	29	SITE2511	CLUST448		chrVII	878710	878815	-	tW(CCA)G2	-11	na
chrVII	916945	916946	-	4951	0	0	1	0	0	SITE2524	CLUST453		chrVII	917040	918446	+	YGR212W	-95	na
chrVII	931034	931035	+	32703	0	0	1	0	0	SITE2530	CLUST454		chrVII	930953	931023	-	tG(GCC)G2	-11	na
chrVII	931035	931036	+	18433	2377	18548	4	2	6	SITE2531	CLUST454		chrVII	930953	931023	-	tG(GCC)G2	-12	na
chrVII	931036	931037	+	115743	86260	138227	29	39	40	SITE2532	CLUST454		chrVII	930953	931023	-	tG(GCC)G2	-13	na
chrVII	931035	931036	-	0	0	7444	0	0	1	SITE2533	CLUST454		chrVII	930953	931023	-	tG(GCC)G2	-13	na
chrVII	931037	931038	+	30819	12805	17781	7	4	2	SITE2534	CLUST454		chrVII	930953	931023	-	tG(GCC)G2	-14	na
chrVII	931037	931038	-	176	0	418	1	0	1	SITE2536	CLUST454		chrVII	930953	931023	-	tG(GCC)G2	-15	na
chrVII	931038	931039	-	150	11883	4460	1	5	3	SITE2538	CLUST454		chrVII	930953	931023	-	tG(GCC)G2	-16	na
chrVII	931039	931040	-	82840	107893	179750	22	39	42	SITE2539	CLUST454		chrVII	930953	931023	-	tG(GCC)G2	-17	na
chrVII	931040	931041	-	37992	12766	13218	4	5	3	SITE2540	CLUST454		chrVII	930953	931023	-	tG(GCC)G2	-18	na
chrVII	931041	931042	+	0	0	796	0	0	1	SITE2541	CLUST454		chrVII	930953	931023	-	tG(GCC)G2	-18	na
chrVII	960158	960159	+	0	0	15663	0	0	1	SITE2548	CLUST456		chrVII	959904	961103	+	YGR234W	0	254
chrVII	1004201	1004202	+	11463	7309	6918	1	4	2	SITE2553	CLUST459		chrVII	1004216	1004287	+	tT(UGU)G2	-15	na
chrVII	1004202	1004203	+	506	2802	11322	1	2	2	SITE2554	CLUST459		chrVII	1004216	1004287	+	tT(UGU)G2	-14	na
chrVII	1004203	1004204	+	0	0	2525	0	0	2	SITE2555	CLUST459		chrVII	1004216	1004287	+	tT(UGU)G2	-13	na
chrVII	1004204	1004205	-	13367	19291	18753	3	6	5	SITE2559	CLUST459		chrVII	1004216	1004287	+	tT(UGU)G2	-12	na
chrVII	1004205	1004206	-	0	0	4339	0	0	2	SITE2560	CLUST459		chrVII	1004216	1004287	+	tT(UGU)G2	-11	na
chrVII	1004209	1004210	-	0	1731	0	0	1	0	SITE2565	CLUST459		chrVII	1004216	1004287	+	tT(UGU)G2	-7	na
chrVII	1004217	1004218	-	0	149	0	0	1	0	SITE2566	CLUST459		chrVII	1004216	1004287	+	tT(UGU)G2	0	2
chrVII	1004221	1004222	-	994	0	0	1	0	0	SITE2568	CLUST459		chrVII	1004216	1004287	+	tT(UGU)G2	0	6
chrVII	1004234	1004235	+	0	2143	0	0	1	0	SITE2569	CLUST459		chrVII	1004216	1004287	+	tT(UGU)G2	0	18
chrVII	1011294	1011295	+	0	8592	0	0	1	0	SITE2570	CLUST460		chrVII	1007671	1010766	-	YGR258C	-528	na
chrVII	1079290	1079291	+	0	752	0	0	1	0	SITE2583	CLUST466		chrVII	1079885	1080346	-	YGR293C	1056	na
chrVIII	62738	62739	+	345	11399	40368	1	4	7	SITE2593	CLUST469		chrVIII	62755	62826	+	tH(GUG)H	-17	na
chrVIII	62739	62740	+	0	2421	921	0	1	1	SITE2594	CLUST469		chrVIII	62755	62826	+	tH(GUG)H	-16	na
chrVIII	62740	62741	+	35679	1995	3105	1	3	1	SITE2595	CLUST469		chrVIII	62755	62826	+	tH(GUG)H	-15	na
chrVIII	62739	62740	-	0	353	0	0	1	0	SITE2596	CLUST469		chrVIII	62755	62826	+	tH(GUG)H	-16	na
chrVIII	62740	62741	-	383	1342	0	1	2	0	SITE2597	CLUST469		chrVIII	62755	62826	+	tH(GUG)H	-15	na
chrVIII	62741	62742	+	0	1746	2015	0	1	1	SITE2598	CLUST469		chrVIII	62755	62826	+	tH(GUG)H	-14	na
chrVIII	62741	62742	-	7431	15827	7384	2	2	4	SITE2599	CLUST469		chrVIII	62755	62826	+	tH(GUG)H	-14	na
chrVIII	62742	62743	-	357	4684	9912	1	4	3	SITE2601	CLUST469		chrVIII	62755	62826	+	tH(GUG)H	-13	na
chrVIII	62743	62744	-	17813	4097	4662	4	2	4	SITE2603	CLUST469		chrVIII	62755	62826	+	tH(GUG)H	-12	na
chrVIII	62744	62745	-	2309	0	14216	1	0	2	SITE2604	CLUST469		chrVIII	62755	62826	+	tH(GUG)H	-11	na
chrVIII	69662	69663	+	0	0	9533	0	0	1	SITE2605	CLUST470		chrVIII	69708	70070	+	YHL018W	-46	na
chrVIII	85386	85387	-	84650	67747	137947	33	33	32	SITE2613	CLUST473		chrVIII	85298	85371	-	tV(AAC)H	-16	na
chrVIII	85387	85388	-	0	5087	1528	0	3	1	SITE2614	CLUST473		chrVIII	85298	85371	-	tV(AAC)H	-17	na
chrVIII	85388	85389	-	272	933	10952	1	2	2	SITE2615	CLUST473		chrVIII	85298	85371	-	tV(AAC)H	-18	na
chrVIII	116187	116188	+	0	0	59	0	0	1	SITE2620	CLUST474		chrVIII	116107	116179	-	tT(AGU)H	-8	na
chrVIII	116189	116190	+	1121	4534	0	2	2	0	SITE2622	CLUST474		chrVIII	116107	116179	-	tT(AGU)H	-10	na
chrVIII	116190	116191	+	21835	38286	74942	7	16	16	SITE2623	CLUST474		chrVIII	116107	116179	-	tT(AGU)H	-11	na
chrVIII	116191	116192	+	75089	56136	23803	20	18	13	SITE2624	CLUST474		chrVIII	116107	116179	-	tT(AGU)H	-12	na
chrVIII	116192	116193	+	0	0	6412	0	0	2	SITE2626	CLUST474		chrVIII	116107	116179	-	tT(AGU)H	-13	na
chrVIII	116192	116193	-	0	6862	6198	0	2	1	SITE2627	CLUST474		chrVIII	116107	116179	-	tT(AGU)H	-14	na
chrVIII	116193	116194	-	28070	15727	36753	6	6	9	SITE2629	CLUST474		chrVIII	116107	116179	-	tT(AGU)H	-15	na
chrVIII	116194	116195	-	115046	37061	166051	22	14	17	SITE2630	CLUST474		chrVIII	116107	116179	-	tT(AGU)H	-16	na
chrVIII	116198	116199	+	258	3173	0	1	1	0	SITE2632	CLUST474		chrVIII	116107	116179	-	tT(AGU)H	-19	na
chrVIII	133114	133115	-	9222	0	0	1	0	0	SITE2635	CLUST476		chrVIII	133026	133107	-	tS(AGA)H	-8	na
chrVIII	133115	133116	+	0	0	9712	0	0	1	SITE2636	CLUST476		chrVIII	133026	133107	-	tS(AGA)H	-8	na
chrVIII	133118	133119	+	956	865	3339	1	1	3	SITE2638	CLUST476		chrVIII	133026	133107	-	tS(AGA)H	-11	na
chrVIII	133119	133120	+	46389	78141	92805	13	27	24	SITE2639	CLUST476		chrVIII	133026	133107	-	tS(AGA)H	-12	na
chrVIII	133121	133122	-	6835	2551	8368	2	3	2	SITE2644	CLUST476		chrVIII	133026	133107	-	tS(AGA)H	-15	na
chrVIII	133122	133123	+	0	0	156	0	0	1	SITE2645	CLUST476		chrVIII	133026	133107	-	tS(AGA)H	-15	na
chrVIII	133122	133123	-	42129	32959	113955	11	18	24	SITE2646	CLUST476		chrVIII	133026	133107	-	tS(AGA)H	-16	na
chrVIII	133125	133126	-	58	0	0	1	0	0	SITE2649	CLUST476		chrVIII	133026	133107	-	tS(AGA)H	-19	na
chrVIII	134305	134306	+	101856	90780	217848	24	36	45	SITE2652	CLUST477		chrVIII	134321	134392	+	tQ(UUG)H	-16	na
chrVIII	134306	134307	+	0	111	0	0	1	0	SITE2653	CLUST477		chrVIII	134321	134392	+	tQ(UUG)H	-15	na
chrVIII	134308	134309	-	76099	207887	216257	27	42	46	SITE2656	CLUST477		chrVIII	134321	134392	+	tQ(UUG)H	-13	na
chrVIII	146329	146330	-	286216	108480	285585	21	23	33	SITE2672	CLUST478		chrVIII	146242	146314	-	tA(AGC)H	-16	na
chrVIII	146330	146331	-	591	680	0	1	1	0	SITE2673	CLUST478		chrVIII	146242	146314	-	tA(AGC)H	-17	na
chrVIII	146331	146332	-	12638	6832	1168	1	2	3	SITE2674	CLUST478		chrVIII	146242	146314	-	tA(AGC)H	-18	na
chrVIII	237941	237942	+	0	6111	0	0	1	0	SITE2688	CLUST480		chrVIII	237848	237939	-	tF(GAA)H1	-2	na
chrVIII	237952	237953	+	162243	111100	111587	23	34	28	SITE2692	CLUST480		chrVIII	237848	237939	-	tF(GAA)H1	-13	na
chrVIII	237953	237954	+	0	1742	0	0	1	0	SITE2693	CLUST480		chrVIII	237848	237939	-	tF(GAA)H1	-14	na
chrVIII	237954	237955	+	0	8190	0	0	1	0	SITE2694	CLUST480		chrVIII	237848	237939	-	tF(GAA)H1	-15	na
chrVIII	237955	237956	-	99919	26559	95765	26	17	20	SITE2698	CLUST480		chrVIII	237848	237939	-	tF(GAA)H1	-17	na
chrVIII	237956	237957	+	0	0	3490	0	0	2	SITE2699	CLUST480		chrVIII	237848	237939	-	tF(GAA)H1	-17	na
chrVIII	237957	237958	-	0	1939	0	0	1	0	SITE2701	CLUST480		chrVIII	237848	237939	-	tF(GAA)H1	-19	na
chrVIII	358568	358569	+	204	0	0	1	0	0	SITE2735	CLUST485		chrVIII	358478	358569	-	tF(GAA)H2	0	1
chrVIII	358575	358576	+	0	0	12207	0	0	1	SITE2736	CLUST485		chrVIII	358478	358569	-	tF(GAA)H2	-6	na
chrVIII	358580	358581	+	1414	1820	12898	2	2	5	SITE2739	CLUST485		chrVIII	358478	358569	-	tF(GAA)H2	-11	na
chrVIII	358581	358582	+	4577	35062	24039	3	7	4	SITE2740	CLUST485		chrVIII	358478	358569	-	tF(GAA)H2	-12	na
chrVIII	358582	358583	+	478	41600	61830	1	11	10	SITE2742	CLUST485		chrVIII	358478	358569	-	tF(GAA)H2	-13	na
chrVIII	358583	358584	+	219	0	5338	1	0	1	SITE2744	CLUST485		chrVIII	358478	358569	-	tF(GAA)H2	-14	na
chrVIII	358583	358584	-	22985	1093	815	2	1	1	SITE2745	CLUST485		chrVIII	358478	358569	-	tF(GAA)H2	-15	na
chrVIII	358584	358585	+	3564	5648	21233	1	3	3	SITE2746	CLUST485		chrVIII	358478	358569	-	tF(GAA)H2	-15	na
chrVIII	358584	358585	-	1422	4443	6135	1	3	3	SITE2747	CLUST485		chrVIII	358478	358569	-	tF(GAA)H2	-16	na
chrVIII	358585	358586	-	3458	5351	30821	3	6	9	SITE2749	CLUST485		chrVIII	358478	358569	-	tF(GAA)H2	-17	na
chrVIII	358586	358587	-	389	0	1722	1	0	1	SITE2750	CLUST485		chrVIII	358478	358569	-	tF(GAA)H2	-18	na
chrVIII	358587	358588	-	0	0	14653	0	0	3	SITE2751	CLUST485		chrVIII	358478	358569	-	tF(GAA)H2	-19	na
chrVIII	358590	358591	+	84	0	139	1	0	1	SITE2752	CLUST485		chrVIII	358478	358569	-	tF(GAA)H2	-21	na
chrVIII	389001	389002	+	0	1301	0	0	1	0	SITE2758	CLUST489		chrVIII	388981	389337	-	YHR145C	0	336
chrVIII	389004	389005	+	0	7686	0	0	1	0	SITE2760	CLUST489		chrVIII	388981	389337	-	YHR145C	0	333
chrVIII	389007	389008	+	135033	134511	173123	26	44	35	SITE2763	CLUST489		chrVIII	388981	389337	-	YHR145C	0	330
chrVIII	389008	389009	+	0	706	4613	0	1	1	SITE2765	CLUST489		chrVIII	388981	389337	-	YHR145C	0	329
chrVIII	389009	389010	+	0	2989	863	0	1	1	SITE2766	CLUST489		chrVIII	388981	389337	-	YHR145C	0	328
chrVIII	389010	389011	-	129417	122861	76061	21	31	37	SITE2769	CLUST489		chrVIII	388981	389337	-	YHR145C	0	326
chrVIII	389011	389012	-	12911	0	0	1	0	0	SITE2770	CLUST489		chrVIII	388981	389337	-	YHR145C	0	325
chrVIII	389012	389013	-	70	0	0	1	0	0	SITE2771	CLUST489		chrVIII	388981	389337	-	YHR145C	0	324
chrVIII	389013	389014	-	1244	0	0	1	0	0	SITE2772	CLUST489		chrVIII	388981	389337	-	YHR145C	0	323
chrVIII	389018	389019	-	6288	1969	0	1	1	0	SITE2775	CLUST489		chrVIII	388981	389337	-	YHR145C	0	318
chrVIII	466973	466974	+	596	33670	21418	1	11	5	SITE2793	CLUST495		chrVIII	466958	467062	-	YHR180C-B	0	89
chrVIII	466974	466975	+	366	0	0	1	0	0	SITE2794	CLUST495		chrVIII	466958	467062	-	YHR180C-B	0	88
chrVIII	466975	466976	+	22281	34682	30462	5	9	7	SITE2795	CLUST495		chrVIII	466958	467062	-	YHR180C-B	0	87
chrVIII	466976	466977	+	33550	6939	6495	4	3	2	SITE2796	CLUST495		chrVIII	466958	467062	-	YHR180C-B	0	86
chrVIII	466975	466976	-	0	0	11619	0	0	1	SITE2797	CLUST495		chrVIII	466958	467062	-	YHR180C-B	0	86
chrVIII	466976	466977	-	36034	18799	35562	5	8	7	SITE2798	CLUST495		chrVIII	466958	467062	-	YHR180C-B	0	85
chrVIII	466977	466978	+	0	3192	11175	0	1	1	SITE2799	CLUST495		chrVIII	466958	467062	-	YHR180C-B	0	85
chrVIII	466978	466979	-	40480	61862	21138	4	15	9	SITE2802	CLUST495		chrVIII	466958	467062	-	YHR180C-B	0	83
chrVIII	466979	466980	-	0	15070	6185	0	3	2	SITE2803	CLUST495		chrVIII	466958	467062	-	YHR180C-B	0	82
chrVIII	466980	466981	-	0	0	2535	0	0	1	SITE2804	CLUST495		chrVIII	466958	467062	-	YHR180C-B	0	81
chrVIII	466984	466985	+	201	0	69	1	0	1	SITE2805	CLUST495		chrVIII	466958	467062	-	YHR180C-B	0	78
chrVIII	467023	467024	+	0	0	2435	0	0	1	SITE2809	CLUST496		chrVIII	466990	467061	+	tT(UGU)H	0	33
chrVIII	475785	475786	+	0	0	71	0	0	1	SITE2812	CLUST498		chrVIII	475706	475778	-	tV(CAC)H	-7	na
chrVIII	475786	475787	+	0	3838	0	0	2	0	SITE2813	CLUST498		chrVIII	475706	475778	-	tV(CAC)H	-8	na
chrVIII	475787	475788	+	1234	7670	12118	5	3	6	SITE2814	CLUST498		chrVIII	475706	475778	-	tV(CAC)H	-9	na
chrVIII	475788	475789	+	552	0	0	1	0	0	SITE2815	CLUST498		chrVIII	475706	475778	-	tV(CAC)H	-10	na
chrVIII	475789	475790	+	5940	14430	24691	8	17	12	SITE2816	CLUST498		chrVIII	475706	475778	-	tV(CAC)H	-11	na
chrVIII	475788	475789	-	0	0	11858	0	0	1	SITE2817	CLUST498		chrVIII	475706	475778	-	tV(CAC)H	-11	na
chrVIII	475789	475790	-	0	22685	15585	0	2	3	SITE2818	CLUST498		chrVIII	475706	475778	-	tV(CAC)H	-12	na
chrVIII	475790	475791	+	0	0	658	0	0	1	SITE2819	CLUST498		chrVIII	475706	475778	-	tV(CAC)H	-12	na
chrVIII	475790	475791	-	735	11218	24170	2	5	5	SITE2820	CLUST498		chrVIII	475706	475778	-	tV(CAC)H	-13	na
chrVIII	475791	475792	-	0	3305	0	0	1	0	SITE2822	CLUST498		chrVIII	475706	475778	-	tV(CAC)H	-14	na
chrVIII	475792	475793	-	27540	61993	103819	4	22	23	SITE2823	CLUST498		chrVIII	475706	475778	-	tV(CAC)H	-15	na
chrVIII	475794	475795	-	557	0	0	1	0	0	SITE2825	CLUST498		chrVIII	475706	475778	-	tV(CAC)H	-17	na
chrVIII	475795	475796	-	0	629	0	0	1	0	SITE2826	CLUST498		chrVIII	475706	475778	-	tV(CAC)H	-18	na
chrVIII	475800	475801	+	0	1834	1936	0	1	2	SITE2827	CLUST498		chrVIII	475706	475778	-	tV(CAC)H	-22	na
chrVIII	506107	506108	-	0	6769	0	0	1	0	SITE2831	CLUST499		chrVIII	506319	508709	+	YHR204W	-212	na
chrVIII	516589	516590	-	0	0	30762	0	0	1	SITE2835	CLUST500		chrVIII	514905	516485	-	YHR207C	-105	na
chrIX	121889	121890	-	0	113	0	0	1	0	SITE2856	CLUST509		chrIX	117992	122071	+	YIL126W	0	3898
chrIX	173786	173787	+	559	73	0	1	1	0	SITE2864	CLUST514		chrIX	173365	173592	-	YIL102C-A	-194	na
chrIX	175010	175011	+	0	6346	0	0	1	0	SITE2865	CLUST515		chrIX	175031	175103	+	tT(AGU)I1	-21	na
chrIX	175011	175012	+	0	0	7029	0	0	1	SITE2866	CLUST515		chrIX	175031	175103	+	tT(AGU)I1	-20	na
chrIX	175015	175016	+	151065	107579	189155	19	28	28	SITE2870	CLUST515		chrIX	175031	175103	+	tT(AGU)I1	-16	na
chrIX	175016	175017	+	3648	1899	11491	1	1	2	SITE2871	CLUST515		chrIX	175031	175103	+	tT(AGU)I1	-15	na
chrIX	175019	175020	+	0	0	14533	0	0	1	SITE2874	CLUST515		chrIX	175031	175103	+	tT(AGU)I1	-12	na
chrIX	175018	175019	-	137191	120679	170592	24	29	32	SITE2875	CLUST515		chrIX	175031	175103	+	tT(AGU)I1	-13	na
chrIX	175019	175020	-	0	0	7397	0	0	2	SITE2876	CLUST515		chrIX	175031	175103	+	tT(AGU)I1	-12	na
chrIX	175020	175021	-	0	3822	0	0	1	0	SITE2877	CLUST515		chrIX	175031	175103	+	tT(AGU)I1	-11	na
chrIX	183523	183524	+	0	1982	2589	0	2	1	SITE2882	CLUST516		chrIX	183440	183513	-	tI(AAU)I1	-10	na
chrIX	183525	183526	+	33522	40803	48795	11	15	11	SITE2883	CLUST516		chrIX	183440	183513	-	tI(AAU)I1	-12	na
chrIX	183526	183527	+	12586	474	2799	3	1	1	SITE2884	CLUST516		chrIX	183440	183513	-	tI(AAU)I1	-13	na
chrIX	183526	183527	-	0	0	11043	0	0	1	SITE2886	CLUST516		chrIX	183440	183513	-	tI(AAU)I1	-14	na
chrIX	183527	183528	-	0	93	0	0	1	0	SITE2888	CLUST516		chrIX	183440	183513	-	tI(AAU)I1	-15	na
chrIX	183528	183529	-	24046	24905	52116	11	13	8	SITE2889	CLUST516		chrIX	183440	183513	-	tI(AAU)I1	-16	na
chrIX	183529	183530	-	0	149	6593	0	1	2	SITE2890	CLUST516		chrIX	183440	183513	-	tI(AAU)I1	-17	na
chrIX	197570	197571	+	0	0	2496	0	0	1	SITE2891	CLUST517		chrIX	197592	197663	+	tE(CUC)I	-22	na
chrIX	197569	197570	-	0	928	0	0	1	0	SITE2892	CLUST517		chrIX	197592	197663	+	tE(CUC)I	-23	na
chrIX	197575	197576	+	85389	41086	34757	12	9	12	SITE2895	CLUST517		chrIX	197592	197663	+	tE(CUC)I	-17	na
chrIX	197576	197577	+	718	21685	24467	1	3	4	SITE2896	CLUST517		chrIX	197592	197663	+	tE(CUC)I	-16	na
chrIX	197578	197579	-	55691	89256	34070	16	24	9	SITE2899	CLUST517		chrIX	197592	197663	+	tE(CUC)I	-14	na
chrIX	197579	197580	-	22991	2306	0	4	3	0	SITE2900	CLUST517		chrIX	197592	197663	+	tE(CUC)I	-13	na
chrIX	197580	197581	+	0	6304	0	0	1	0	SITE2901	CLUST517		chrIX	197592	197663	+	tE(CUC)I	-12	na
chrIX	197583	197584	-	427	0	0	1	0	0	SITE2905	CLUST517		chrIX	197592	197663	+	tE(CUC)I	-9	na
chrIX	197592	197593	-	0	2486	0	0	1	0	SITE2906	CLUST517		chrIX	197592	197663	+	tE(CUC)I	0	1
chrIX	205560	205561	+	2296	15464	19741	3	3	2	SITE2918	CLUST518		chrIX	205635	210132	+	YIL082W-A	-75	na
chrIX	206980	206981	+	0	0	1422	0	0	1	SITE2940	CLUST520		chrIX	205635	210132	+	YIL082W-A	0	1345
chrIX	207021	207022	+	104	0	0	1	0	0	SITE2943	CLUST520		chrIX	205635	210132	+	YIL082W-A	0	1386
chrIX	207692	207693	-	854	7055	0	1	2	0	SITE2952	CLUST522		chrIX	205635	210132	+	YIL082W-A	0	2058
chrIX	210646	210647	+	11760	0	5997	1	0	1	SITE2976	CLUST523		chrIX	210665	210738	+	tI(AAU)I2	-19	na
chrIX	210647	210648	+	0	2965	8032	0	1	1	SITE2977	CLUST523		chrIX	210665	210738	+	tI(AAU)I2	-18	na
chrIX	210648	210649	+	50687	38891	101921	13	17	20	SITE2978	CLUST523		chrIX	210665	210738	+	tI(AAU)I2	-17	na
chrIX	248823	248824	+	0	0	4496	0	0	1	SITE2988	CLUST528		chrIX	248850	248931	+	tS(UGA)I	-27	na
chrIX	248831	248832	+	1325	3863	0	1	2	0	SITE2989	CLUST528		chrIX	248850	248931	+	tS(UGA)I	-19	na
chrIX	248832	248833	+	352	0	0	1	0	0	SITE2990	CLUST528		chrIX	248850	248931	+	tS(UGA)I	-18	na
chrIX	248833	248834	+	33425	23394	24298	10	17	13	SITE2991	CLUST528		chrIX	248850	248931	+	tS(UGA)I	-17	na
chrIX	248834	248835	+	10596	25290	27819	7	10	9	SITE2992	CLUST528		chrIX	248850	248931	+	tS(UGA)I	-16	na
chrIX	248834	248835	-	0	7648	0	0	1	0	SITE2994	CLUST528		chrIX	248850	248931	+	tS(UGA)I	-16	na
chrIX	248835	248836	+	24910	17700	14340	11	8	7	SITE2995	CLUST528		chrIX	248850	248931	+	tS(UGA)I	-15	na
chrIX	248836	248837	+	2971	1678	1326	2	2	1	SITE2996	CLUST528		chrIX	248850	248931	+	tS(UGA)I	-14	na
chrIX	248835	248836	-	25546	12575	0	1	1	0	SITE2997	CLUST528		chrIX	248850	248931	+	tS(UGA)I	-15	na
chrIX	248836	248837	-	7215	73538	58261	6	13	9	SITE2998	CLUST528		chrIX	248850	248931	+	tS(UGA)I	-14	na
chrIX	248837	248838	+	0	2191	695	0	1	1	SITE2999	CLUST528		chrIX	248850	248931	+	tS(UGA)I	-13	na
chrIX	248838	248839	+	8472	198	505	1	2	1	SITE3000	CLUST528		chrIX	248850	248931	+	tS(UGA)I	-12	na
chrIX	248837	248838	-	45193	9719	139899	9	8	13	SITE3001	CLUST528		chrIX	248850	248931	+	tS(UGA)I	-13	na
chrIX	248838	248839	-	114986	29627	92078	12	9	13	SITE3002	CLUST528		chrIX	248850	248931	+	tS(UGA)I	-12	na
chrIX	248839	248840	+	1606	1321	3756	1	1	1	SITE3003	CLUST528		chrIX	248850	248931	+	tS(UGA)I	-11	na
chrIX	248839	248840	-	355	4841	1428	1	3	1	SITE3004	CLUST528		chrIX	248850	248931	+	tS(UGA)I	-11	na
chrIX	248840	248841	-	0	20691	0	0	5	0	SITE3006	CLUST528		chrIX	248850	248931	+	tS(UGA)I	-10	na
chrIX	248841	248842	-	117	3964	8348	1	1	2	SITE3007	CLUST528		chrIX	248850	248931	+	tS(UGA)I	-9	na
chrIX	248852	248853	+	0	2208	0	0	1	0	SITE3009	CLUST528		chrIX	248850	248931	+	tS(UGA)I	0	2
chrIX	300309	300310	+	5490	3974	0	4	1	0	SITE3013	CLUST529		chrIX	300228	300300	-	tK(CUU)I	-9	na
chrIX	300310	300311	+	4208	0	2173	1	0	1	SITE3014	CLUST529		chrIX	300228	300300	-	tK(CUU)I	-10	na
chrIX	300311	300312	+	21603	43531	76886	10	15	18	SITE3015	CLUST529		chrIX	300228	300300	-	tK(CUU)I	-11	na
chrIX	300312	300313	-	17054	19437	6620	2	3	2	SITE3018	CLUST529		chrIX	300228	300300	-	tK(CUU)I	-13	na
chrIX	300313	300314	-	0	0	4897	0	0	1	SITE3019	CLUST529		chrIX	300228	300300	-	tK(CUU)I	-14	na
chrIX	300314	300315	-	76454	76205	101325	12	16	14	SITE3020	CLUST529		chrIX	300228	300300	-	tK(CUU)I	-15	na
chrIX	300323	300324	-	0	84	0	0	1	0	SITE3023	CLUST529		chrIX	300228	300300	-	tK(CUU)I	-24	na
chrIX	324383	324384	+	0	0	858	0	0	1	SITE3025	CLUST530		chrIX	324303	324374	-	tD(GUC)I1	-9	na
chrIX	324385	324386	+	0	6564	2018	0	1	1	SITE3027	CLUST530		chrIX	324303	324374	-	tD(GUC)I1	-11	na
chrIX	324386	324387	+	72141	42429	153532	11	19	21	SITE3028	CLUST530		chrIX	324303	324374	-	tD(GUC)I1	-12	na
chrIX	324387	324388	+	8476	21426	55880	4	5	9	SITE3030	CLUST530		chrIX	324303	324374	-	tD(GUC)I1	-13	na
chrIX	324386	324387	-	0	319	1300	0	1	2	SITE3031	CLUST530		chrIX	324303	324374	-	tD(GUC)I1	-13	na
chrIX	324388	324389	+	0	4335	2917	0	1	1	SITE3032	CLUST530		chrIX	324303	324374	-	tD(GUC)I1	-14	na
chrIX	324388	324389	-	28185	0	8435	2	0	3	SITE3034	CLUST530		chrIX	324303	324374	-	tD(GUC)I1	-15	na
chrIX	324389	324390	-	51467	40732	103512	13	17	18	SITE3036	CLUST530		chrIX	324303	324374	-	tD(GUC)I1	-16	na
chrIX	324390	324391	-	28645	11337	36630	6	7	9	SITE3037	CLUST530		chrIX	324303	324374	-	tD(GUC)I1	-17	na
chrIX	324392	324393	+	0	20241	0	0	1	0	SITE3038	CLUST530		chrIX	324303	324374	-	tD(GUC)I1	-18	na
chrIX	325729	325730	+	182	0	0	1	0	0	SITE3046	CLUST532		chrIX	325748	325820	+	tT(AGU)I2	-19	na
chrIX	325730	325731	+	0	660	0	0	1	0	SITE3047	CLUST532		chrIX	325748	325820	+	tT(AGU)I2	-18	na
chrIX	325731	325732	+	15314	6082	16534	3	3	6	SITE3048	CLUST532		chrIX	325748	325820	+	tT(AGU)I2	-17	na
chrIX	325732	325733	+	5530	44390	31919	4	7	5	SITE3049	CLUST532		chrIX	325748	325820	+	tT(AGU)I2	-16	na
chrIX	325733	325734	+	0	0	3103	0	0	1	SITE3050	CLUST532		chrIX	325748	325820	+	tT(AGU)I2	-15	na
chrIX	325733	325734	-	0	11423	0	0	2	0	SITE3051	CLUST532		chrIX	325748	325820	+	tT(AGU)I2	-15	na
chrIX	325734	325735	+	0	3400	0	0	1	0	SITE3052	CLUST532		chrIX	325748	325820	+	tT(AGU)I2	-14	na
chrIX	325734	325735	-	239	7594	40415	1	4	8	SITE3053	CLUST532		chrIX	325748	325820	+	tT(AGU)I2	-14	na
chrIX	325735	325736	-	26492	37404	51665	3	11	12	SITE3055	CLUST532		chrIX	325748	325820	+	tT(AGU)I2	-13	na
chrIX	325737	325738	-	0	890	0	0	1	0	SITE3057	CLUST532		chrIX	325748	325820	+	tT(AGU)I2	-11	na
chrIX	325739	325740	+	0	3656	0	0	1	0	SITE3059	CLUST532		chrIX	325748	325820	+	tT(AGU)I2	-9	na
chrIX	325739	325740	-	0	5475	0	0	1	0	SITE3060	CLUST532		chrIX	325748	325820	+	tT(AGU)I2	-9	na
chrIX	336431	336432	+	8078	155	3450	1	1	2	SITE3064	CLUST533		chrIX	336349	336420	-	tD(GUC)I2	-11	na
chrIX	336432	336433	+	15733	1251	0	1	1	0	SITE3065	CLUST533		chrIX	336349	336420	-	tD(GUC)I2	-12	na
chrIX	336433	336434	+	12005	0	316	4	0	1	SITE3066	CLUST533		chrIX	336349	336420	-	tD(GUC)I2	-13	na
chrIX	336434	336435	+	0	0	7181	0	0	2	SITE3067	CLUST533		chrIX	336349	336420	-	tD(GUC)I2	-14	na
chrIX	336434	336435	-	0	0	13791	0	0	1	SITE3069	CLUST533		chrIX	336349	336420	-	tD(GUC)I2	-15	na
chrIX	336436	336437	-	0	1750	1372	0	2	1	SITE3072	CLUST533		chrIX	336349	336420	-	tD(GUC)I2	-17	na
chrIX	370399	370400	+	0	1851	2491	0	1	3	SITE3080	CLUST536		chrIX	370417	370488	+	tE(UUC)I	-18	na
chrIX	370400	370401	+	55888	36456	62192	13	19	19	SITE3081	CLUST536		chrIX	370417	370488	+	tE(UUC)I	-17	na
chrIX	370402	370403	+	0	3919	13950	0	1	1	SITE3083	CLUST536		chrIX	370417	370488	+	tE(UUC)I	-15	na
chrIX	370404	370405	+	0	884	0	0	1	0	SITE3086	CLUST536		chrIX	370417	370488	+	tE(UUC)I	-13	na
chrIX	370403	370404	-	52156	60591	71347	17	27	24	SITE3087	CLUST536		chrIX	370417	370488	+	tE(UUC)I	-14	na
chrIX	370405	370406	-	0	717	5417	0	1	2	SITE3090	CLUST536		chrIX	370417	370488	+	tE(UUC)I	-12	na
chrIX	370406	370407	+	0	1792	0	0	1	0	SITE3091	CLUST536		chrIX	370417	370488	+	tE(UUC)I	-11	na
chrIX	370406	370407	-	3799	0	0	2	0	0	SITE3092	CLUST536		chrIX	370417	370488	+	tE(UUC)I	-11	na
chrX	59174	59175	+	710	0	0	1	0	0	SITE3108	CLUST545		chrX	59100	59172	-	tT(AGU)J	-2	na
chrX	59177	59178	-	0	0	793	0	0	1	SITE3109	CLUST545		chrX	59100	59172	-	tT(AGU)J	-6	na
chrX	59183	59184	+	0	2566	6381	0	1	1	SITE3112	CLUST545		chrX	59100	59172	-	tT(AGU)J	-11	na
chrX	59184	59185	+	46368	163078	328604	20	38	51	SITE3113	CLUST545		chrX	59100	59172	-	tT(AGU)J	-12	na
chrX	59186	59187	-	4598	0	0	1	0	0	SITE3117	CLUST545		chrX	59100	59172	-	tT(AGU)J	-15	na
chrX	59187	59188	-	26450	43346	44080	18	23	26	SITE3118	CLUST545		chrX	59100	59172	-	tT(AGU)J	-16	na
chrX	116020	116021	+	0	15314	0	0	1	0	SITE3133	CLUST548		chrX	115939	116010	-	tE(UUC)J	-10	na
chrX	116021	116022	-	0	0	4201	0	0	1	SITE3136	CLUST548		chrX	115939	116010	-	tE(UUC)J	-12	na
chrX	116022	116023	+	0	0	291	0	0	1	SITE3137	CLUST548		chrX	115939	116010	-	tE(UUC)J	-12	na
chrX	116023	116024	+	41023	59164	76334	7	20	13	SITE3138	CLUST548		chrX	115939	116010	-	tE(UUC)J	-13	na
chrX	116023	116024	-	472	0	0	1	0	0	SITE3139	CLUST548		chrX	115939	116010	-	tE(UUC)J	-14	na
chrX	116025	116026	-	0	0	11014	0	0	1	SITE3143	CLUST548		chrX	115939	116010	-	tE(UUC)J	-16	na
chrX	116026	116027	-	28358	46485	72279	7	12	14	SITE3144	CLUST548		chrX	115939	116010	-	tE(UUC)J	-17	na
chrX	134142	134143	-	0	0	79	0	0	1	SITE3154	CLUST551		chrX	134332	135933	-	YJL153C	1790	na
chrX	197394	197395	-	0	7123	0	0	1	0	SITE3164	CLUST556		chrX	197313	197385	-	tA(AGC)J	-10	na
chrX	197395	197396	+	10072	7007	58574	3	3	6	SITE3165	CLUST556		chrX	197313	197385	-	tA(AGC)J	-10	na
chrX	197396	197397	+	32368	4688	25704	3	1	7	SITE3166	CLUST556		chrX	197313	197385	-	tA(AGC)J	-11	na
chrX	197397	197398	+	3458	12322	57004	3	10	6	SITE3167	CLUST556		chrX	197313	197385	-	tA(AGC)J	-12	na
chrX	197399	197400	+	0	846	0	0	1	0	SITE3171	CLUST556		chrX	197313	197385	-	tA(AGC)J	-14	na
chrX	197398	197399	-	30181	7344	1850	9	4	1	SITE3172	CLUST556		chrX	197313	197385	-	tA(AGC)J	-14	na
chrX	197399	197400	-	3629	12201	4187	4	4	4	SITE3173	CLUST556		chrX	197313	197385	-	tA(AGC)J	-15	na
chrX	197400	197401	-	16298	11244	43889	10	4	9	SITE3174	CLUST556		chrX	197313	197385	-	tA(AGC)J	-16	na
chrX	197401	197402	-	13760	0	8601	1	0	2	SITE3175	CLUST556		chrX	197313	197385	-	tA(AGC)J	-17	na
chrX	204717	204718	+	81	0	5928	1	0	2	SITE3180	CLUST557		chrX	204735	204806	+	tD(GUC)J1	-18	na
chrX	204718	204719	+	246	6437	9912	1	2	1	SITE3181	CLUST557		chrX	204735	204806	+	tD(GUC)J1	-17	na
chrX	204719	204720	+	35132	85170	103630	5	16	15	SITE3182	CLUST557		chrX	204735	204806	+	tD(GUC)J1	-16	na
chrX	204720	204721	+	609	1119	22580	1	2	6	SITE3183	CLUST557		chrX	204735	204806	+	tD(GUC)J1	-15	na
chrX	204720	204721	-	16295	0	0	2	0	0	SITE3185	CLUST557		chrX	204735	204806	+	tD(GUC)J1	-15	na
chrX	204721	204722	+	0	0	60176	0	0	7	SITE3186	CLUST557		chrX	204735	204806	+	tD(GUC)J1	-14	na
chrX	204721	204722	-	0	10265	576	0	3	2	SITE3188	CLUST557		chrX	204735	204806	+	tD(GUC)J1	-14	na
chrX	204723	204724	+	6429	1913	0	1	1	0	SITE3189	CLUST557		chrX	204735	204806	+	tD(GUC)J1	-12	na
chrX	204722	204723	-	8832	43378	42836	4	7	12	SITE3190	CLUST557		chrX	204735	204806	+	tD(GUC)J1	-13	na
chrX	204723	204724	-	47299	14111	25217	9	8	8	SITE3191	CLUST557		chrX	204735	204806	+	tD(GUC)J1	-12	na
chrX	204724	204725	-	4586	0	0	1	0	0	SITE3193	CLUST557		chrX	204735	204806	+	tD(GUC)J1	-11	na
chrX	204725	204726	-	0	0	822	0	0	1	SITE3195	CLUST557		chrX	204735	204806	+	tD(GUC)J1	-10	na
chrX	204726	204727	-	831	388	2096	2	2	1	SITE3197	CLUST557		chrX	204735	204806	+	tD(GUC)J1	-9	na
chrX	204727	204728	+	0	5539	0	0	1	0	SITE3198	CLUST557		chrX	204735	204806	+	tD(GUC)J1	-8	na
chrX	204727	204728	-	9410	0	0	1	0	0	SITE3199	CLUST557		chrX	204735	204806	+	tD(GUC)J1	-8	na
chrX	233923	233924	+	119838	57102	109388	15	22	23	SITE3207	CLUST559		chrX	233939	234011	+	tR(ACG)J	-16	na
chrX	233924	233925	+	0	201	0	0	2	0	SITE3208	CLUST559		chrX	233939	234011	+	tR(ACG)J	-15	na
chrX	233926	233927	-	49912	55068	60764	14	22	23	SITE3212	CLUST559		chrX	233939	234011	+	tR(ACG)J	-13	na
chrX	233927	233928	-	326	28259	2280	1	3	1	SITE3214	CLUST559		chrX	233939	234011	+	tR(ACG)J	-12	na
chrX	233928	233929	-	0	0	13815	0	0	2	SITE3216	CLUST559		chrX	233939	234011	+	tR(ACG)J	-11	na
chrX	233930	233931	-	616	2129	0	1	1	0	SITE3217	CLUST559		chrX	233939	234011	+	tR(ACG)J	-9	na
chrX	354227	354228	+	26381	48791	52268	10	20	13	SITE3241	CLUST566		chrX	354244	354332	+	tY(GUA)J1	-17	na
chrX	354229	354230	+	0	2745	0	0	1	0	SITE3243	CLUST566		chrX	354244	354332	+	tY(GUA)J1	-15	na
chrX	354229	354230	-	61	1795	1647	1	1	2	SITE3245	CLUST566		chrX	354244	354332	+	tY(GUA)J1	-15	na
chrX	354230	354231	-	78987	59365	155515	16	18	32	SITE3246	CLUST566		chrX	354244	354332	+	tY(GUA)J1	-14	na
chrX	354232	354233	+	1019	3679	89	1	1	1	SITE3248	CLUST566		chrX	354244	354332	+	tY(GUA)J1	-12	na
chrX	354232	354233	-	0	0	4711	0	0	1	SITE3249	CLUST566		chrX	354244	354332	+	tY(GUA)J1	-12	na
chrX	355358	355359	+	41682	6109	103464	6	4	10	SITE3254	CLUST567		chrX	355374	355445	+	tR(UCU)J1	-16	na
chrX	355361	355362	-	50359	57254	58588	7	11	17	SITE3259	CLUST567		chrX	355374	355445	+	tR(UCU)J1	-13	na
chrX	355362	355363	-	0	0	6807	0	0	2	SITE3261	CLUST567		chrX	355374	355445	+	tR(UCU)J1	-12	na
chrX	355366	355367	-	0	0	11159	0	0	1	SITE3264	CLUST567		chrX	355374	355445	+	tR(UCU)J1	-8	na
chrX	355368	355369	-	0	0	2110	0	0	1	SITE3266	CLUST567		chrX	355374	355445	+	tR(UCU)J1	-6	na
chrX	355440	355441	+	7027	4625	4682	1	2	2	SITE3269	CLUST568		chrX	355374	355445	+	tR(UCU)J1	0	66
chrX	355443	355444	-	7879	0	0	1	0	0	SITE3272	CLUST568		chrX	355374	355445	+	tR(UCU)J1	0	70
chrX	374509	374510	-	0	0	8891	0	0	1	SITE3282	CLUST572		chrX	374506	374577	-	tR(UCU)J2	0	67
chrX	374510	374511	-	0	2766	0	0	1	0	SITE3283	CLUST572		chrX	374506	374577	-	tR(UCU)J2	0	66
chrX	374586	374587	+	279	350	416	1	1	2	SITE3288	CLUST573		chrX	374506	374577	-	tR(UCU)J2	-9	na
chrX	374587	374588	+	0	3758	0	0	1	0	SITE3289	CLUST573		chrX	374506	374577	-	tR(UCU)J2	-10	na
chrX	374588	374589	+	0	4790	10241	0	1	1	SITE3290	CLUST573		chrX	374506	374577	-	tR(UCU)J2	-11	na
chrX	374588	374589	-	0	10314	0	0	1	0	SITE3292	CLUST573		chrX	374506	374577	-	tR(UCU)J2	-12	na
chrX	374589	374590	+	39212	35016	93371	13	11	13	SITE3293	CLUST573		chrX	374506	374577	-	tR(UCU)J2	-12	na
chrX	374590	374591	+	4655	22360	1392	2	9	1	SITE3294	CLUST573		chrX	374506	374577	-	tR(UCU)J2	-13	na
chrX	374590	374591	-	0	8594	0	0	1	0	SITE3295	CLUST573		chrX	374506	374577	-	tR(UCU)J2	-14	na
chrX	374592	374593	-	29524	54249	139172	5	19	22	SITE3299	CLUST573		chrX	374506	374577	-	tR(UCU)J2	-16	na
chrX	374593	374594	-	395	0	17800	1	0	2	SITE3300	CLUST573		chrX	374506	374577	-	tR(UCU)J2	-17	na
chrX	378344	378345	+	19048	50104	37665	7	12	8	SITE3303	CLUST574		chrX	378360	378433	+	tV(AAC)J	-16	na
chrX	378346	378347	+	0	0	1949	0	0	1	SITE3305	CLUST574		chrX	378360	378433	+	tV(AAC)J	-14	na
chrX	378346	378347	-	0	0	574	0	0	1	SITE3307	CLUST574		chrX	378360	378433	+	tV(AAC)J	-14	na
chrX	378347	378348	-	63214	45972	118969	10	15	24	SITE3308	CLUST574		chrX	378360	378433	+	tV(AAC)J	-13	na
chrX	378348	378349	-	4536	0	0	2	0	0	SITE3309	CLUST574		chrX	378360	378433	+	tV(AAC)J	-12	na
chrX	378349	378350	-	17896	0	0	1	0	0	SITE3310	CLUST574		chrX	378360	378433	+	tV(AAC)J	-11	na
chrX	391111	391112	+	875	196	55	1	1	1	SITE3312	CLUST575		chrX	391043	391115	-	tM(CAU)J1	0	4
chrX	391117	391118	+	895	10670	0	1	1	0	SITE3313	CLUST575		chrX	391043	391115	-	tM(CAU)J1	-2	na
chrX	391123	391124	+	0	1416	0	0	1	0	SITE3316	CLUST575		chrX	391043	391115	-	tM(CAU)J1	-8	na
chrX	391126	391127	+	0	1519	0	0	1	0	SITE3317	CLUST575		chrX	391043	391115	-	tM(CAU)J1	-11	na
chrX	391125	391126	-	1127	979	0	1	1	0	SITE3318	CLUST575		chrX	391043	391115	-	tM(CAU)J1	-11	na
chrX	391127	391128	+	352	12939	2382	2	7	3	SITE3319	CLUST575		chrX	391043	391115	-	tM(CAU)J1	-12	na
chrX	391128	391129	+	6177	16176	8050	3	8	5	SITE3321	CLUST575		chrX	391043	391115	-	tM(CAU)J1	-13	na
chrX	391128	391129	-	0	2695	0	0	1	0	SITE3322	CLUST575		chrX	391043	391115	-	tM(CAU)J1	-14	na
chrX	391129	391130	-	20912	4774	0	1	1	0	SITE3324	CLUST575		chrX	391043	391115	-	tM(CAU)J1	-15	na
chrX	391130	391131	-	197	4740	102653	1	2	18	SITE3325	CLUST575		chrX	391043	391115	-	tM(CAU)J1	-16	na
chrX	391131	391132	-	14657	7795	33003	3	4	8	SITE3326	CLUST575		chrX	391043	391115	-	tM(CAU)J1	-17	na
chrX	391132	391133	-	0	0	1398	0	0	1	SITE3327	CLUST575		chrX	391043	391115	-	tM(CAU)J1	-18	na
chrX	396807	396808	+	569	1392	0	1	1	0	SITE3332	CLUST577		chrX	396726	396796	-	tG(GCC)J1	-11	na
chrX	396808	396809	+	1599	0	5397	2	0	3	SITE3333	CLUST577		chrX	396726	396796	-	tG(GCC)J1	-12	na
chrX	396809	396810	+	1847	1551	9148	2	1	7	SITE3334	CLUST577		chrX	396726	396796	-	tG(GCC)J1	-13	na
chrX	396810	396811	+	6898	211	6838	2	2	4	SITE3337	CLUST577		chrX	396726	396796	-	tG(GCC)J1	-14	na
chrX	396810	396811	-	211	1048	0	1	1	0	SITE3338	CLUST577		chrX	396726	396796	-	tG(GCC)J1	-15	na
chrX	396811	396812	-	10633	1572	14967	2	2	4	SITE3340	CLUST577		chrX	396726	396796	-	tG(GCC)J1	-16	na
chrX	396812	396813	-	1315	4784	16798	4	4	9	SITE3341	CLUST577		chrX	396726	396796	-	tG(GCC)J1	-17	na
chrX	396813	396814	-	101	3526	9659	1	2	3	SITE3342	CLUST577		chrX	396726	396796	-	tG(GCC)J1	-18	na
chrX	396814	396815	-	0	0	827	0	0	1	SITE3343	CLUST577		chrX	396726	396796	-	tG(GCC)J1	-19	na
chrX	414944	414945	-	0	3014	0	0	1	0	SITE3346	CLUST579		chrX	414966	415038	+	tK(CUU)J	-22	na
chrX	414950	414951	+	943	0	0	1	0	0	SITE3347	CLUST579		chrX	414966	415038	+	tK(CUU)J	-16	na
chrX	414951	414952	+	14562	11047	20482	2	5	4	SITE3348	CLUST579		chrX	414966	415038	+	tK(CUU)J	-15	na
chrX	414952	414953	+	0	0	12080	0	0	1	SITE3349	CLUST579		chrX	414966	415038	+	tK(CUU)J	-14	na
chrX	414953	414954	+	0	0	3119	0	0	1	SITE3350	CLUST579		chrX	414966	415038	+	tK(CUU)J	-13	na
chrX	414953	414954	-	16721	364	3728	1	1	2	SITE3352	CLUST579		chrX	414966	415038	+	tK(CUU)J	-13	na
chrX	414954	414955	-	3797	6159	11446	3	4	4	SITE3353	CLUST579		chrX	414966	415038	+	tK(CUU)J	-12	na
chrX	416046	416047	+	2067	2959	11181	2	1	3	SITE3357	CLUST580		chrX	415931	416036	-	tW(CCA)J	-10	na
chrX	416047	416048	+	31776	59591	90515	11	15	16	SITE3358	CLUST580		chrX	415931	416036	-	tW(CCA)J	-11	na
chrX	416047	416048	-	0	2701	0	0	1	0	SITE3360	CLUST580		chrX	415931	416036	-	tW(CCA)J	-12	na
chrX	416049	416050	-	319	5866	0	2	1	0	SITE3363	CLUST580		chrX	415931	416036	-	tW(CCA)J	-14	na
chrX	416050	416051	-	66245	22069	45214	11	13	13	SITE3364	CLUST580		chrX	415931	416036	-	tW(CCA)J	-15	na
chrX	422916	422917	+	0	0	105	0	0	1	SITE3368	CLUST581		chrX	422698	423012	-	YJL007C	0	96
chrX	422918	422919	+	730	10806	13256	1	3	3	SITE3370	CLUST581		chrX	422698	423012	-	YJL007C	0	94
chrX	422921	422922	+	8953	22600	0	2	5	0	SITE3373	CLUST581		chrX	422698	423012	-	YJL007C	0	91
chrX	422922	422923	+	49439	6867	19813	9	3	6	SITE3375	CLUST581		chrX	422698	423012	-	YJL007C	0	90
chrX	422921	422922	-	0	4767	14319	0	2	4	SITE3376	CLUST581		chrX	422698	423012	-	YJL007C	0	90
chrX	422923	422924	+	477	7192	0	1	2	0	SITE3377	CLUST581		chrX	422698	423012	-	YJL007C	0	89
chrX	422922	422923	-	0	257	0	0	1	0	SITE3378	CLUST581		chrX	422698	423012	-	YJL007C	0	89
chrX	422924	422925	+	0	0	58	0	0	1	SITE3379	CLUST581		chrX	422698	423012	-	YJL007C	0	88
chrX	422924	422925	-	289	7600	12135	2	3	7	SITE3381	CLUST581		chrX	422698	423012	-	YJL007C	0	87
chrX	422925	422926	-	16095	14305	31206	5	4	4	SITE3382	CLUST581		chrX	422698	423012	-	YJL007C	0	86
chrX	422926	422927	-	362	3751	0	1	1	0	SITE3383	CLUST581		chrX	422698	423012	-	YJL007C	0	85
chrX	422943	422944	-	0	3221	0	0	1	0	SITE3387	CLUST581		chrX	422937	423009	+	tM(CAU)J2	0	7
chrX	424523	424524	+	0	0	18755	0	0	1	SITE3390	CLUST582		chrX	424432	424515	-	tL(UAA)J	-8	na
chrX	424525	424526	+	2364	28010	25220	3	6	7	SITE3393	CLUST582		chrX	424432	424515	-	tL(UAA)J	-10	na
chrX	424526	424527	+	19804	20909	25067	3	6	7	SITE3395	CLUST582		chrX	424432	424515	-	tL(UAA)J	-11	na
chrX	424527	424528	+	20017	42182	77443	13	9	10	SITE3396	CLUST582		chrX	424432	424515	-	tL(UAA)J	-12	na
chrX	424528	424529	-	262	18123	7826	1	2	5	SITE3400	CLUST582		chrX	424432	424515	-	tL(UAA)J	-14	na
chrX	424529	424530	-	516	12648	278	2	2	1	SITE3401	CLUST582		chrX	424432	424515	-	tL(UAA)J	-15	na
chrX	424530	424531	-	44217	33395	37596	7	14	9	SITE3402	CLUST582		chrX	424432	424515	-	tL(UAA)J	-16	na
chrX	517896	517897	+	124755	34154	57624	16	9	13	SITE3421	CLUST588		chrX	517813	517884	-	tM(CAU)J3	-12	na
chrX	517899	517900	-	26283	31321	65846	7	11	16	SITE3426	CLUST588		chrX	517813	517884	-	tM(CAU)J3	-16	na
chrX	519359	519360	-	0	0	3448	0	0	1	SITE3429	CLUST589		chrX	518763	519185	-	YJR044C	-175	na
chrX	524099	524100	+	0	5292	0	0	1	0	SITE3432	CLUST591		chrX	524012	524093	-	tS(AGA)J	-6	na
chrX	524103	524104	-	0	0	23146	0	0	1	SITE3436	CLUST591		chrX	524012	524093	-	tS(AGA)J	-11	na
chrX	524104	524105	-	0	2749	0	0	1	0	SITE3438	CLUST591		chrX	524012	524093	-	tS(AGA)J	-12	na
chrX	524105	524106	+	95309	93877	89637	17	20	14	SITE3439	CLUST591		chrX	524012	524093	-	tS(AGA)J	-12	na
chrX	524106	524107	+	13244	22100	25075	1	2	3	SITE3440	CLUST591		chrX	524012	524093	-	tS(AGA)J	-13	na
chrX	524108	524109	-	91767	69676	82378	16	23	18	SITE3444	CLUST591		chrX	524012	524093	-	tS(AGA)J	-16	na
chrX	524109	524110	-	11779	1795	12292	2	2	2	SITE3445	CLUST591		chrX	524012	524093	-	tS(AGA)J	-17	na
chrX	524110	524111	-	5866	191	2297	2	1	1	SITE3446	CLUST591		chrX	524012	524093	-	tS(AGA)J	-18	na
chrX	531806	531807	-	0	0	2399	0	0	1	SITE3451	CLUST593		chrX	531828	531898	+	tG(GCC)J2	-22	na
chrX	531809	531810	+	0	0	19811	0	0	3	SITE3453	CLUST593		chrX	531828	531898	+	tG(GCC)J2	-19	na
chrX	531811	531812	+	91768	40870	79031	21	25	23	SITE3455	CLUST593		chrX	531828	531898	+	tG(GCC)J2	-17	na
chrX	531811	531812	-	0	0	5155	0	0	1	SITE3456	CLUST593		chrX	531828	531898	+	tG(GCC)J2	-17	na
chrX	531812	531813	+	0	697	5738	0	1	1	SITE3457	CLUST593		chrX	531828	531898	+	tG(GCC)J2	-16	na
chrX	531812	531813	-	0	169	5497	0	1	2	SITE3458	CLUST593		chrX	531828	531898	+	tG(GCC)J2	-16	na
chrX	531813	531814	+	216	324	24366	1	1	2	SITE3459	CLUST593		chrX	531828	531898	+	tG(GCC)J2	-15	na
chrX	531813	531814	-	0	0	1552	0	0	1	SITE3460	CLUST593		chrX	531828	531898	+	tG(GCC)J2	-15	na
chrX	531814	531815	+	74	0	0	1	0	0	SITE3461	CLUST593		chrX	531828	531898	+	tG(GCC)J2	-14	na
chrX	531814	531815	-	19122	37743	27895	8	18	8	SITE3463	CLUST593		chrX	531828	531898	+	tG(GCC)J2	-14	na
chrX	531815	531816	-	0	142	20172	0	1	2	SITE3464	CLUST593		chrX	531828	531898	+	tG(GCC)J2	-13	na
chrX	531816	531817	-	0	242	685	0	1	1	SITE3465	CLUST593		chrX	531828	531898	+	tG(GCC)J2	-12	na
chrX	531818	531819	-	228	0	242	1	0	1	SITE3468	CLUST593		chrX	531828	531898	+	tG(GCC)J2	-10	na
chrX	531821	531822	-	0	2131	0	0	1	0	SITE3469	CLUST593		chrX	531828	531898	+	tG(GCC)J2	-7	na
chrX	538540	538541	+	9827	40681	42942	6	10	13	SITE3473	CLUST594		chrX	538555	538626	+	tR(CCU)J	-15	na
chrX	538541	538542	+	15937	39745	37244	9	13	7	SITE3474	CLUST594		chrX	538555	538626	+	tR(CCU)J	-14	na
chrX	538542	538543	+	17615	15219	13842	4	5	4	SITE3475	CLUST594		chrX	538555	538626	+	tR(CCU)J	-13	na
chrX	538542	538543	-	148	0	0	1	0	0	SITE3476	CLUST594		chrX	538555	538626	+	tR(CCU)J	-13	na
chrX	538543	538544	+	0	0	4259	0	0	1	SITE3477	CLUST594		chrX	538555	538626	+	tR(CCU)J	-12	na
chrX	538543	538544	-	11079	28822	59155	4	7	14	SITE3478	CLUST594		chrX	538555	538626	+	tR(CCU)J	-12	na
chrX	538544	538545	-	54262	16845	23342	7	8	5	SITE3479	CLUST594		chrX	538555	538626	+	tR(CCU)J	-11	na
chrX	538545	538546	-	18405	32419	31077	3	8	5	SITE3480	CLUST594		chrX	538555	538626	+	tR(CCU)J	-10	na
chrX	541491	541492	+	10791	26294	25980	4	9	4	SITE3483	CLUST595		chrX	541508	541579	+	tD(GUC)J4	-17	na
chrX	541493	541494	+	13414	8980	44066	4	3	4	SITE3486	CLUST595		chrX	541508	541579	+	tD(GUC)J4	-15	na
chrX	541494	541495	-	6376	44194	55769	6	13	16	SITE3489	CLUST595		chrX	541508	541579	+	tD(GUC)J4	-14	na
chrX	541496	541497	+	0	0	1598	0	0	1	SITE3490	CLUST595		chrX	541508	541579	+	tD(GUC)J4	-12	na
chrX	541496	541497	-	19859	8559	28264	5	5	8	SITE3492	CLUST595		chrX	541508	541579	+	tD(GUC)J4	-12	na
chrX	541500	541501	-	0	3119	0	0	1	0	SITE3493	CLUST595		chrX	541508	541579	+	tD(GUC)J4	-8	na
chrX	543054	543055	+	0	0	34636	0	0	1	SITE3495	CLUST596		chrX	542956	543044	-	tY(GUA)J2	-10	na
chrX	543056	543057	+	0	0	625	0	0	1	SITE3497	CLUST596		chrX	542956	543044	-	tY(GUA)J2	-12	na
chrX	543057	543058	+	49508	62283	131269	11	19	25	SITE3499	CLUST596		chrX	542956	543044	-	tY(GUA)J2	-13	na
chrX	543059	543060	+	0	0	2596	0	0	1	SITE3502	CLUST596		chrX	542956	543044	-	tY(GUA)J2	-15	na
chrX	543059	543060	-	3827	0	0	1	0	0	SITE3503	CLUST596		chrX	542956	543044	-	tY(GUA)J2	-16	na
chrX	543060	543061	-	57704	43189	76796	12	19	19	SITE3504	CLUST596		chrX	542956	543044	-	tY(GUA)J2	-17	na
chrX	543068	543069	+	0	0	6116	0	0	1	SITE3507	CLUST596		chrX	542956	543044	-	tY(GUA)J2	-24	na
chrX	617902	617903	+	67	0	1186	1	0	1	SITE3520	CLUST600		chrX	617919	618019	+	tL(UAG)J	-17	na
chrX	617903	617904	+	89601	55322	136843	25	18	27	SITE3521	CLUST600		chrX	617919	618019	+	tL(UAG)J	-16	na
chrX	617904	617905	+	42724	32378	43573	14	15	18	SITE3522	CLUST600		chrX	617919	618019	+	tL(UAG)J	-15	na
chrX	617905	617906	-	0	0	55	0	0	1	SITE3524	CLUST600		chrX	617919	618019	+	tL(UAG)J	-14	na
chrX	617906	617907	+	0	0	3396	0	0	1	SITE3525	CLUST600		chrX	617919	618019	+	tL(UAG)J	-13	na
chrX	617906	617907	-	74632	48754	154132	10	17	29	SITE3526	CLUST600		chrX	617919	618019	+	tL(UAG)J	-13	na
chrX	617907	617908	-	39188	93729	169635	12	25	23	SITE3527	CLUST600		chrX	617919	618019	+	tL(UAG)J	-12	na
chrX	617908	617909	+	0	0	8690	0	0	1	SITE3528	CLUST600		chrX	617919	618019	+	tL(UAG)J	-11	na
chrX	617921	617922	-	0	7269	0	0	1	0	SITE3532	CLUST600		chrX	617919	618019	+	tL(UAG)J	0	3
chrX	686620	686621	-	0	0	120	0	0	1	SITE3539	CLUST602		chrX	684567	689321	+	YJR138W	0	2054
chrXI	46820	46821	+	242169	174317	161999	45	57	48	SITE3557	CLUST608		chrXI	46735	46806	-	tT(CGU)K	-14	na
chrXI	46822	46823	+	0	0	81	0	0	1	SITE3561	CLUST608		chrXI	46735	46806	-	tT(CGU)K	-16	na
chrXI	46823	46824	-	15045	85413	54722	35	43	40	SITE3563	CLUST608		chrXI	46735	46806	-	tT(CGU)K	-18	na
chrXI	46828	46829	-	0	4642	0	0	1	0	SITE3565	CLUST608		chrXI	46735	46806	-	tT(CGU)K	-23	na
chrXI	74607	74608	+	0	0	4670	0	0	2	SITE3566	CLUST609		chrXI	74624	74697	+	tN(GUU)K	-17	na
chrXI	74608	74609	+	27743	62425	98332	16	31	27	SITE3567	CLUST609		chrXI	74624	74697	+	tN(GUU)K	-16	na
chrXI	74610	74611	+	28614	4913	0	3	3	0	SITE3569	CLUST609		chrXI	74624	74697	+	tN(GUU)K	-14	na
chrXI	74611	74612	+	634	0	0	1	0	0	SITE3571	CLUST609		chrXI	74624	74697	+	tN(GUU)K	-13	na
chrXI	74610	74611	-	1076	0	0	1	0	0	SITE3572	CLUST609		chrXI	74624	74697	+	tN(GUU)K	-14	na
chrXI	74611	74612	-	135034	102660	191663	33	39	43	SITE3573	CLUST609		chrXI	74624	74697	+	tN(GUU)K	-13	na
chrXI	74612	74613	+	88	11509	3297	1	3	1	SITE3574	CLUST609		chrXI	74624	74697	+	tN(GUU)K	-12	na
chrXI	74612	74613	-	0	0	3271	0	0	1	SITE3575	CLUST609		chrXI	74624	74697	+	tN(GUU)K	-12	na
chrXI	74613	74614	-	24835	13289	4733	6	5	1	SITE3576	CLUST609		chrXI	74624	74697	+	tN(GUU)K	-11	na
chrXI	74615	74616	-	226	0	6456	1	0	3	SITE3578	CLUST609		chrXI	74624	74697	+	tN(GUU)K	-9	na
chrXI	84189	84190	+	0	0	125	0	0	1	SITE3580	CLUST610		chrXI	84208	84291	+	tL(UAA)K	-19	na
chrXI	84191	84192	+	18500	31187	44824	7	8	8	SITE3582	CLUST610		chrXI	84208	84291	+	tL(UAA)K	-17	na
chrXI	84192	84193	+	193	6056	78	1	3	1	SITE3583	CLUST610		chrXI	84208	84291	+	tL(UAA)K	-16	na
chrXI	84193	84194	+	0	134	0	0	1	0	SITE3584	CLUST610		chrXI	84208	84291	+	tL(UAA)K	-15	na
chrXI	84194	84195	-	29048	111965	38982	7	19	8	SITE3586	CLUST610		chrXI	84208	84291	+	tL(UAA)K	-14	na
chrXI	84195	84196	-	6488	260	32112	1	1	4	SITE3587	CLUST610		chrXI	84208	84291	+	tL(UAA)K	-13	na
chrXI	141098	141099	-	0	0	1457	0	0	1	SITE3597	CLUST614		chrXI	141018	141089	-	tE(UUC)K	-10	na
chrXI	141101	141102	-	0	0	24119	0	0	1	SITE3599	CLUST614		chrXI	141018	141089	-	tE(UUC)K	-13	na
chrXI	141102	141103	+	504	7424	5500	1	4	4	SITE3600	CLUST614		chrXI	141018	141089	-	tE(UUC)K	-13	na
chrXI	141102	141103	-	334	0	0	1	0	0	SITE3601	CLUST614		chrXI	141018	141089	-	tE(UUC)K	-14	na
chrXI	141103	141104	+	0	0	23222	0	0	1	SITE3602	CLUST614		chrXI	141018	141089	-	tE(UUC)K	-14	na
chrXI	141103	141104	-	11861	0	0	1	0	0	SITE3603	CLUST614		chrXI	141018	141089	-	tE(UUC)K	-15	na
chrXI	141104	141105	+	0	0	134	0	0	1	SITE3604	CLUST614		chrXI	141018	141089	-	tE(UUC)K	-15	na
chrXI	141105	141106	-	21678	14336	32169	5	5	7	SITE3607	CLUST614		chrXI	141018	141089	-	tE(UUC)K	-17	na
chrXI	141107	141108	-	423	0	0	2	0	0	SITE3608	CLUST614		chrXI	141018	141089	-	tE(UUC)K	-19	na
chrXI	162567	162568	+	0	1274	0	0	1	0	SITE3612	CLUST616		chrXI	162487	162558	-	tR(UCU)K	-9	na
chrXI	162566	162567	-	9961	0	0	1	0	0	SITE3613	CLUST616		chrXI	162487	162558	-	tR(UCU)K	-9	na
chrXI	162568	162569	+	282	130	8376	2	1	1	SITE3614	CLUST616		chrXI	162487	162558	-	tR(UCU)K	-10	na
chrXI	162569	162570	+	9869	7868	1748	3	6	1	SITE3615	CLUST616		chrXI	162487	162558	-	tR(UCU)K	-11	na
chrXI	162570	162571	+	274	0	0	1	0	0	SITE3616	CLUST616		chrXI	162487	162558	-	tR(UCU)K	-12	na
chrXI	162571	162572	+	215	19328	1446	2	5	2	SITE3618	CLUST616		chrXI	162487	162558	-	tR(UCU)K	-13	na
chrXI	162572	162573	+	5438	21849	37363	6	10	15	SITE3619	CLUST616		chrXI	162487	162558	-	tR(UCU)K	-14	na
chrXI	162571	162572	-	5610	197	810	2	1	1	SITE3620	CLUST616		chrXI	162487	162558	-	tR(UCU)K	-14	na
chrXI	162572	162573	-	24658	17392	13740	2	3	5	SITE3621	CLUST616		chrXI	162487	162558	-	tR(UCU)K	-15	na
chrXI	162573	162574	-	141	0	0	1	0	0	SITE3623	CLUST616		chrXI	162487	162558	-	tR(UCU)K	-16	na
chrXI	162574	162575	-	18407	2256	2450	3	1	2	SITE3624	CLUST616		chrXI	162487	162558	-	tR(UCU)K	-17	na
chrXI	162575	162576	-	175090	56005	91375	16	19	11	SITE3625	CLUST616		chrXI	162487	162558	-	tR(UCU)K	-18	na
chrXI	162577	162578	-	516	0	0	1	0	0	SITE3627	CLUST616		chrXI	162487	162558	-	tR(UCU)K	-20	na
chrXI	202642	202643	-	11701	0	0	1	0	0	SITE3634	CLUST620		chrXI	202999	203071	+	tK(CUU)K	-357	na
chrXI	202984	202985	+	37924	55542	92994	18	23	29	SITE3641	CLUST622		chrXI	202999	203071	+	tK(CUU)K	-15	na
chrXI	202986	202987	-	0	0	1668	0	0	1	SITE3645	CLUST622		chrXI	202999	203071	+	tK(CUU)K	-13	na
chrXI	202987	202988	-	254463	195764	193764	22	33	34	SITE3646	CLUST622		chrXI	202999	203071	+	tK(CUU)K	-12	na
chrXI	202988	202989	-	10811	0	0	2	0	0	SITE3647	CLUST622		chrXI	202999	203071	+	tK(CUU)K	-11	na
chrXI	202990	202991	+	6253	0	0	1	0	0	SITE3649	CLUST622		chrXI	202999	203071	+	tK(CUU)K	-9	na
chrXI	219869	219870	+	0	10237	0	0	2	0	SITE3656	CLUST624		chrXI	219895	219967	+	tA(AGC)K1	-26	na
chrXI	219870	219871	-	33685	0	0	4	0	0	SITE3658	CLUST624		chrXI	219895	219967	+	tA(AGC)K1	-25	na
chrXI	219878	219879	+	14163	14828	25271	3	7	6	SITE3660	CLUST624		chrXI	219895	219967	+	tA(AGC)K1	-17	na
chrXI	219879	219880	+	0	15188	18873	0	8	6	SITE3661	CLUST624		chrXI	219895	219967	+	tA(AGC)K1	-16	na
chrXI	219880	219881	+	1000	7730	6137	3	3	2	SITE3662	CLUST624		chrXI	219895	219967	+	tA(AGC)K1	-15	na
chrXI	219882	219883	+	0	1021	0	0	1	0	SITE3665	CLUST624		chrXI	219895	219967	+	tA(AGC)K1	-13	na
chrXI	219881	219882	-	15186	3573	19620	3	4	3	SITE3666	CLUST624		chrXI	219895	219967	+	tA(AGC)K1	-14	na
chrXI	219882	219883	-	198	5491	18204	1	5	7	SITE3667	CLUST624		chrXI	219895	219967	+	tA(AGC)K1	-13	na
chrXI	219883	219884	-	0	4027	7432	0	2	3	SITE3668	CLUST624		chrXI	219895	219967	+	tA(AGC)K1	-12	na
chrXI	302902	302903	+	28331	36066	7699	3	6	3	SITE3693	CLUST629		chrXI	302918	303023	+	tW(CCA)K	-16	na
chrXI	302904	302905	+	57	0	0	1	0	0	SITE3695	CLUST629		chrXI	302918	303023	+	tW(CCA)K	-14	na
chrXI	302905	302906	-	0	9244	17256	0	5	4	SITE3697	CLUST629		chrXI	302918	303023	+	tW(CCA)K	-13	na
chrXI	302907	302908	+	57333	37408	43073	7	10	9	SITE3699	CLUST629		chrXI	302918	303023	+	tW(CCA)K	-11	na
chrXI	302908	302909	-	0	781	27511	0	1	2	SITE3703	CLUST629		chrXI	302918	303023	+	tW(CCA)K	-10	na
chrXI	302909	302910	-	757	0	4090	1	0	1	SITE3704	CLUST629		chrXI	302918	303023	+	tW(CCA)K	-9	na
chrXI	302910	302911	-	8733	26441	21891	8	11	6	SITE3705	CLUST629		chrXI	302918	303023	+	tW(CCA)K	-8	na
chrXI	302911	302912	-	1696	0	0	1	0	0	SITE3707	CLUST629		chrXI	302918	303023	+	tW(CCA)K	-7	na
chrXI	302912	302913	-	929	732	0	1	1	0	SITE3708	CLUST629		chrXI	302918	303023	+	tW(CCA)K	-6	na
chrXI	308225	308226	+	0	0	4109	0	0	1	SITE3711	CLUST630		chrXI	308144	308217	-	tV(AAC)K1	-8	na
chrXI	308226	308227	+	0	0	9349	0	0	1	SITE3712	CLUST630		chrXI	308144	308217	-	tV(AAC)K1	-9	na
chrXI	308229	308230	+	83834	83745	160849	12	17	18	SITE3715	CLUST630		chrXI	308144	308217	-	tV(AAC)K1	-12	na
chrXI	308230	308231	+	955	10849	19333	1	1	1	SITE3716	CLUST630		chrXI	308144	308217	-	tV(AAC)K1	-13	na
chrXI	308231	308232	+	4210	15263	17133	2	5	3	SITE3718	CLUST630		chrXI	308144	308217	-	tV(AAC)K1	-14	na
chrXI	308232	308233	-	40836	71495	108732	12	17	16	SITE3722	CLUST630		chrXI	308144	308217	-	tV(AAC)K1	-16	na
chrXI	308233	308234	-	0	10235	0	0	2	0	SITE3723	CLUST630		chrXI	308144	308217	-	tV(AAC)K1	-17	na
chrXI	308234	308235	-	813	2464	4827	1	1	1	SITE3724	CLUST630		chrXI	308144	308217	-	tV(AAC)K1	-18	na
chrXI	313479	313480	+	0	0	7201	0	0	1	SITE3725	CLUST631		chrXI	313401	313472	-	tH(GUG)K	-7	na
chrXI	313483	313484	+	6994	9459	0	1	2	0	SITE3729	CLUST631		chrXI	313401	313472	-	tH(GUG)K	-11	na
chrXI	313484	313485	+	1188	10855	34042	4	6	6	SITE3731	CLUST631		chrXI	313401	313472	-	tH(GUG)K	-12	na
chrXI	313484	313485	-	0	0	332	0	0	1	SITE3733	CLUST631		chrXI	313401	313472	-	tH(GUG)K	-13	na
chrXI	313486	313487	-	0	2333	9811	0	1	1	SITE3736	CLUST631		chrXI	313401	313472	-	tH(GUG)K	-15	na
chrXI	313487	313488	-	13916	15283	8751	4	3	5	SITE3737	CLUST631		chrXI	313401	313472	-	tH(GUG)K	-16	na
chrXI	313488	313489	+	10856	0	0	1	0	0	SITE3738	CLUST631		chrXI	313401	313472	-	tH(GUG)K	-16	na
chrXI	379662	379663	+	124	0	0	1	0	0	SITE3754	CLUST636		chrXI	379680	379753	+	tV(AAC)K2	-18	na
chrXI	379664	379665	+	32656	15762	45933	6	4	9	SITE3756	CLUST636		chrXI	379680	379753	+	tV(AAC)K2	-16	na
chrXI	379665	379666	+	2749	0	0	3	0	0	SITE3757	CLUST636		chrXI	379680	379753	+	tV(AAC)K2	-15	na
chrXI	379665	379666	-	2509	0	2248	1	0	1	SITE3758	CLUST636		chrXI	379680	379753	+	tV(AAC)K2	-15	na
chrXI	379666	379667	+	17475	7453	1030	3	3	1	SITE3759	CLUST636		chrXI	379680	379753	+	tV(AAC)K2	-14	na
chrXI	379667	379668	-	25213	20878	16112	7	5	5	SITE3762	CLUST636		chrXI	379680	379753	+	tV(AAC)K2	-13	na
chrXI	379669	379670	-	2866	17576	0	1	2	0	SITE3765	CLUST636		chrXI	379680	379753	+	tV(AAC)K2	-11	na
chrXI	458541	458542	+	22673	26148	27438	7	10	8	SITE3774	CLUST639		chrXI	458557	458670	+	tL(CAA)K	-16	na
chrXI	458544	458545	-	6646	46462	21115	4	17	10	SITE3779	CLUST639		chrXI	458557	458670	+	tL(CAA)K	-13	na
chrXI	458547	458548	-	870	4771	1994	1	1	1	SITE3783	CLUST639		chrXI	458557	458670	+	tL(CAA)K	-10	na
chrXI	490950	490951	+	4390	21656	19170	7	9	10	SITE3794	CLUST643		chrXI	490968	491040	+	tR(ACG)K	-18	na
chrXI	490951	490952	+	26150	26369	25614	14	12	17	SITE3795	CLUST643		chrXI	490968	491040	+	tR(ACG)K	-17	na
chrXI	490952	490953	+	7127	11438	15683	11	8	9	SITE3796	CLUST643		chrXI	490968	491040	+	tR(ACG)K	-16	na
chrXI	490953	490954	-	58684	17940	80136	8	12	19	SITE3800	CLUST643		chrXI	490968	491040	+	tR(ACG)K	-15	na
chrXI	490954	490955	-	57115	52488	83353	12	16	22	SITE3801	CLUST643		chrXI	490968	491040	+	tR(ACG)K	-14	na
chrXI	490955	490956	-	14593	36042	15180	4	10	4	SITE3802	CLUST643		chrXI	490968	491040	+	tR(ACG)K	-13	na
chrXI	490966	490967	-	0	0	5298	0	0	1	SITE3805	CLUST643		chrXI	490968	491040	+	tR(ACG)K	-2	na
chrXI	513408	513409	+	150	0	0	1	0	0	SITE3810	CLUST644		chrXI	513332	513403	-	tD(GUC)K	-5	na
chrXI	513415	513416	+	0	0	5877	0	0	1	SITE3816	CLUST644		chrXI	513332	513403	-	tD(GUC)K	-12	na
chrXI	513414	513415	-	0	1836	0	0	1	0	SITE3817	CLUST644		chrXI	513332	513403	-	tD(GUC)K	-12	na
chrXI	513416	513417	+	0	0	9442	0	0	1	SITE3818	CLUST644		chrXI	513332	513403	-	tD(GUC)K	-13	na
chrXI	513417	513418	+	7833	20352	17308	3	10	5	SITE3820	CLUST644		chrXI	513332	513403	-	tD(GUC)K	-14	na
chrXI	513418	513419	-	154	849	0	1	1	0	SITE3823	CLUST644		chrXI	513332	513403	-	tD(GUC)K	-16	na
chrXI	513419	513420	-	0	0	839	0	0	1	SITE3824	CLUST644		chrXI	513332	513403	-	tD(GUC)K	-17	na
chrXI	513420	513421	-	1811	17607	9366	1	4	2	SITE3825	CLUST644		chrXI	513332	513403	-	tD(GUC)K	-18	na
chrXI	513422	513423	-	0	0	15705	0	0	1	SITE3827	CLUST644		chrXI	513332	513403	-	tD(GUC)K	-20	na
chrXI	517970	517971	+	2217	11707	2385	4	9	5	SITE3834	CLUST646		chrXI	517988	518060	+	tA(AGC)K2	-18	na
chrXI	517971	517972	+	15266	16272	15097	16	22	13	SITE3835	CLUST646		chrXI	517988	518060	+	tA(AGC)K2	-17	na
chrXI	517972	517973	-	0	10683	0	0	1	0	SITE3838	CLUST646		chrXI	517988	518060	+	tA(AGC)K2	-16	na
chrXI	517973	517974	-	24836	29189	14962	6	8	4	SITE3840	CLUST646		chrXI	517988	518060	+	tA(AGC)K2	-15	na
chrXI	517974	517975	-	91840	113121	96375	16	21	22	SITE3841	CLUST646		chrXI	517988	518060	+	tA(AGC)K2	-14	na
chrXI	517975	517976	-	0	0	13480	0	0	1	SITE3842	CLUST646		chrXI	517988	518060	+	tA(AGC)K2	-13	na
chrXI	517976	517977	-	0	0	16280	0	0	2	SITE3843	CLUST646		chrXI	517988	518060	+	tA(AGC)K2	-12	na
chrXI	522356	522357	-	0	8474	0	0	1	0	SITE3846	CLUST648		chrXI	522015	523346	+	YKR044W	0	342
chrXI	578947	578948	+	0	0	16364	0	0	2	SITE3858	CLUST655		chrXI	578965	579060	+	tK(UUU)K	-18	na
chrXI	578949	578950	+	153376	138064	135048	16	43	34	SITE3860	CLUST655		chrXI	578965	579060	+	tK(UUU)K	-16	na
chrXI	578950	578951	+	233	17158	18300	2	4	6	SITE3861	CLUST655		chrXI	578965	579060	+	tK(UUU)K	-15	na
chrXI	578951	578952	+	0	2316	25831	0	1	2	SITE3862	CLUST655		chrXI	578965	579060	+	tK(UUU)K	-14	na
chrXI	578950	578951	-	11879	0	0	1	0	0	SITE3863	CLUST655		chrXI	578965	579060	+	tK(UUU)K	-15	na
chrXI	578952	578953	-	90246	131475	74497	29	41	24	SITE3866	CLUST655		chrXI	578965	579060	+	tK(UUU)K	-13	na
chrXI	578953	578954	-	10037	12814	54668	1	4	12	SITE3867	CLUST655		chrXI	578965	579060	+	tK(UUU)K	-12	na
chrXI	578954	578955	-	14799	8569	12452	1	3	5	SITE3869	CLUST655		chrXI	578965	579060	+	tK(UUU)K	-11	na
chrXII	92531	92532	+	2894	3479	8655	1	2	2	SITE3891	CLUST662		chrXII	92548	92650	+	tP(UGG)L	-17	na
chrXII	92532	92533	+	679	0	21336	1	0	4	SITE3892	CLUST662		chrXII	92548	92650	+	tP(UGG)L	-16	na
chrXII	92533	92534	+	0	7790	7497	0	1	2	SITE3893	CLUST662		chrXII	92548	92650	+	tP(UGG)L	-15	na
chrXII	92533	92534	-	83	0	0	1	0	0	SITE3894	CLUST662		chrXII	92548	92650	+	tP(UGG)L	-15	na
chrXII	92534	92535	-	9793	25974	1505	1	6	2	SITE3896	CLUST662		chrXII	92548	92650	+	tP(UGG)L	-14	na
chrXII	92535	92536	-	7575	803	10864	2	2	6	SITE3897	CLUST662		chrXII	92548	92650	+	tP(UGG)L	-13	na
chrXII	92536	92537	-	3696	10033	17831	2	4	4	SITE3899	CLUST662		chrXII	92548	92650	+	tP(UGG)L	-12	na
chrXII	167869	167870	-	0	427	0	0	1	0	SITE3905	CLUST664		chrXII	167320	167802	-	YLR010C	-68	na
chrXII	168037	168038	+	38845	42730	16885	10	14	9	SITE3908	CLUST665		chrXII	167944	168025	-	tS(AGA)L	-12	na
chrXII	168038	168039	+	9637	4185	9933	3	4	5	SITE3909	CLUST665		chrXII	167944	168025	-	tS(AGA)L	-13	na
chrXII	168039	168040	+	66430	10770	25420	9	9	9	SITE3910	CLUST665		chrXII	167944	168025	-	tS(AGA)L	-14	na
chrXII	168040	168041	-	49296	40149	29313	10	14	15	SITE3913	CLUST665		chrXII	167944	168025	-	tS(AGA)L	-16	na
chrXII	168041	168042	-	18997	11729	18673	4	7	10	SITE3914	CLUST665		chrXII	167944	168025	-	tS(AGA)L	-17	na
chrXII	168042	168043	-	22102	13282	21203	5	9	6	SITE3915	CLUST665		chrXII	167944	168025	-	tS(AGA)L	-18	na
chrXII	214963	214964	+	0	0	2064	0	0	1	SITE3926	CLUST668		chrXII	214883	214955	-	tA(UGC)L	-8	na
chrXII	214963	214964	-	0	0	809	0	0	1	SITE3927	CLUST668		chrXII	214883	214955	-	tA(UGC)L	-9	na
chrXII	214964	214965	+	0	5918	0	0	1	0	SITE3928	CLUST668		chrXII	214883	214955	-	tA(UGC)L	-9	na
chrXII	214965	214966	+	17234	29644	28008	5	13	9	SITE3929	CLUST668		chrXII	214883	214955	-	tA(UGC)L	-10	na
chrXII	214966	214967	+	0	3223	0	0	1	0	SITE3930	CLUST668		chrXII	214883	214955	-	tA(UGC)L	-11	na
chrXII	214966	214967	-	86	7756	0	1	2	0	SITE3931	CLUST668		chrXII	214883	214955	-	tA(UGC)L	-12	na
chrXII	214967	214968	+	0	0	18483	0	0	1	SITE3932	CLUST668		chrXII	214883	214955	-	tA(UGC)L	-12	na
chrXII	214968	214969	-	60371	53369	88935	10	15	13	SITE3935	CLUST668		chrXII	214883	214955	-	tA(UGC)L	-14	na
chrXII	214969	214970	+	0	0	968	0	0	1	SITE3936	CLUST668		chrXII	214883	214955	-	tA(UGC)L	-14	na
chrXII	214969	214970	-	55	14417	10352	1	5	1	SITE3937	CLUST668		chrXII	214883	214955	-	tA(UGC)L	-15	na
chrXII	214971	214972	-	702	0	0	2	0	0	SITE3939	CLUST668		chrXII	214883	214955	-	tA(UGC)L	-17	na
chrXII	214972	214973	-	0	0	1282	0	0	1	SITE3940	CLUST668		chrXII	214883	214955	-	tA(UGC)L	-18	na
chrXII	248659	248660	-	0	0	9356	0	0	1	SITE3945	CLUST671		chrXII	248717	250978	-	YLR054C	2318	na
chrXII	326349	326350	+	0	3720	0	0	1	0	SITE3965	CLUST674		chrXII	323544	326225	+	YLR092W	125	na
chrXII	366230	366231	+	115	3992	13819	1	2	5	SITE3967	CLUST675		chrXII	366236	366347	+	snR6	-6	na
chrXII	366232	366233	-	0	0	3866	0	0	1	SITE3970	CLUST675		chrXII	366236	366347	+	snR6	-4	na
chrXII	366233	366234	-	1716	19627	0	4	4	0	SITE3971	CLUST675		chrXII	366236	366347	+	snR6	-3	na
chrXII	366234	366235	-	0	10000	0	0	1	0	SITE3972	CLUST675		chrXII	366236	366347	+	snR6	-2	na
chrXII	366237	366238	-	3697	0	0	1	0	0	SITE3973	CLUST675		chrXII	366236	366347	+	snR6	0	2
chrXII	374337	374338	+	13706	6729	11247	4	3	4	SITE3983	CLUST676		chrXII	374355	374427	+	tR(ACG)L	-18	na
chrXII	374338	374339	+	67526	78778	87156	4	5	6	SITE3984	CLUST676		chrXII	374355	374427	+	tR(ACG)L	-17	na
chrXII	374339	374340	+	283611	97590	166048	38	32	35	SITE3985	CLUST676		chrXII	374355	374427	+	tR(ACG)L	-16	na
chrXII	374342	374343	+	0	798	0	0	1	0	SITE3989	CLUST676		chrXII	374355	374427	+	tR(ACG)L	-13	na
chrXII	390841	390842	+	0	986	0	0	1	0	SITE3999	CLUST679		chrXII	390954	391331	-	YLR122C	490	na
chrXII	404206	404207	-	1622	0	0	1	0	0	SITE4001	CLUST681		chrXII	402794	404062	-	YLR130C	-145	na
chrXII	427114	427115	+	0	2592	0	0	1	0	SITE4008	CLUST684		chrXII	427132	427203	+	tD(GUC)L1	-18	na
chrXII	427116	427117	+	3964	5692	41803	4	5	11	SITE4010	CLUST684		chrXII	427132	427203	+	tD(GUC)L1	-16	na
chrXII	427119	427120	-	18466	48592	12913	6	14	7	SITE4015	CLUST684		chrXII	427132	427203	+	tD(GUC)L1	-13	na
chrXII	444974	444975	-	383	0	0	1	0	0	SITE4020	CLUST686		chrXII	442958	444688	-	YLR152C	-287	na
chrXII	448732	448733	+	1726	0	24419	1	0	2	SITE4023	CLUST688		chrXII	448650	448721	-	tQ(UUG)L	-11	na
chrXII	448733	448734	+	40465	52422	77881	6	19	16	SITE4024	CLUST688		chrXII	448650	448721	-	tQ(UUG)L	-12	na
chrXII	448735	448736	-	0	6441	3852	0	3	2	SITE4027	CLUST688		chrXII	448650	448721	-	tQ(UUG)L	-15	na
chrXII	448736	448737	+	28081	0	0	1	0	0	SITE4028	CLUST688		chrXII	448650	448721	-	tQ(UUG)L	-15	na
chrXII	448736	448737	-	11634	32747	30631	4	13	12	SITE4030	CLUST688		chrXII	448650	448721	-	tQ(UUG)L	-16	na
chrXII	448744	448745	-	128	0	0	1	0	0	SITE4033	CLUST688		chrXII	448650	448721	-	tQ(UUG)L	-24	na
chrXII	449745	449746	+	0	0	2514	0	0	1	SITE4034	CLUST689		chrXII	448650	448721	-	tQ(UUG)L	-1024	na
chrXII	459670	459671	+	70463	166337	217488	77	106	111	SITE4036	CLUST690		chrXII	459677	459797	+	RDN5-1	-7	na
chrXII	459671	459672	+	106401	302427	332939	133	199	182	SITE4037	CLUST690		chrXII	459677	459797	+	RDN5-1	-6	na
chrXII	459675	459676	+	66	0	0	1	0	0	SITE4040	CLUST690		chrXII	459677	459797	+	RDN5-1	-2	na
chrXII	460738	460739	-	0	0	253	0	0	1	SITE4051	CLUST692		chrXII	459677	459797	+	RDN5-1	942	na
chrXII	468807	468808	+	23182	17530	85683	6	27	25	SITE4052	CLUST693		chrXII	468814	468932	+	RDN5-2	-7	na
chrXII	468808	468809	+	26887	86816	67041	4	53	32	SITE4053	CLUST693		chrXII	468814	468932	+	RDN5-2	-6	na
chrXII	489343	489344	+	70150	53848	119717	13	17	23	SITE4057	CLUST694		chrXII	488997	489341	+	YLR161W	3	na
chrXII	489344	489345	+	0	9657	54	0	6	1	SITE4058	CLUST694		chrXII	488997	489341	+	YLR161W	4	na
chrXII	573844	573845	-	0	2144	0	0	1	0	SITE4071	CLUST699		chrXII	573466	573918	-	YLR218C	0	73
chrXII	592628	592629	+	160	1719	1522	1	2	1	SITE4075	CLUST700		chrXII	592519	592619	-	tL(UAG)L1	-9	na
chrXII	592629	592630	+	133	1885	4481	1	1	3	SITE4076	CLUST700		chrXII	592519	592619	-	tL(UAG)L1	-10	na
chrXII	592629	592630	-	0	0	3904	0	0	1	SITE4077	CLUST700		chrXII	592519	592619	-	tL(UAG)L1	-11	na
chrXII	592630	592631	+	41666	35471	86632	14	17	24	SITE4078	CLUST700		chrXII	592519	592619	-	tL(UAG)L1	-11	na
chrXII	592631	592632	+	9014	9109	15677	1	4	2	SITE4079	CLUST700		chrXII	592519	592619	-	tL(UAG)L1	-12	na
chrXII	592632	592633	+	238	2900	24931	1	3	3	SITE4080	CLUST700		chrXII	592519	592619	-	tL(UAG)L1	-13	na
chrXII	592631	592632	-	0	1273	3030	0	1	2	SITE4081	CLUST700		chrXII	592519	592619	-	tL(UAG)L1	-13	na
chrXII	592632	592633	-	1702	5084	3094	3	3	3	SITE4082	CLUST700		chrXII	592519	592619	-	tL(UAG)L1	-14	na
chrXII	592633	592634	-	51479	89004	37888	10	17	13	SITE4084	CLUST700		chrXII	592519	592619	-	tL(UAG)L1	-15	na
chrXII	592634	592635	-	9612	7474	5566	2	2	3	SITE4085	CLUST700		chrXII	592519	592619	-	tL(UAG)L1	-16	na
chrXII	592635	592636	-	190	1792	0	1	1	0	SITE4086	CLUST700		chrXII	592519	592619	-	tL(UAG)L1	-17	na
chrXII	592636	592637	-	0	0	632	0	0	1	SITE4087	CLUST700		chrXII	592519	592619	-	tL(UAG)L1	-18	na
chrXII	592644	592645	-	0	0	4421	0	0	1	SITE4089	CLUST700		chrXII	592519	592619	-	tL(UAG)L1	-26	na
chrXII	592645	592646	-	0	0	6777	0	0	2	SITE4090	CLUST700		chrXII	592519	592619	-	tL(UAG)L1	-27	na
chrXII	605439	605440	+	9739	1874	0	1	2	0	SITE4092	CLUST701		chrXII	605300	605432	-	tI(UAU)L	-7	na
chrXII	605440	605441	+	36222	25713	30711	11	13	13	SITE4093	CLUST701		chrXII	605300	605432	-	tI(UAU)L	-8	na
chrXII	605441	605442	+	2088	13510	35469	1	7	6	SITE4095	CLUST701		chrXII	605300	605432	-	tI(UAU)L	-9	na
chrXII	605442	605443	-	0	0	3361	0	0	1	SITE4097	CLUST701		chrXII	605300	605432	-	tI(UAU)L	-11	na
chrXII	605443	605444	-	9920	60952	54908	6	23	18	SITE4098	CLUST701		chrXII	605300	605432	-	tI(UAU)L	-12	na
chrXII	605444	605445	-	20711	9040	18915	2	4	7	SITE4099	CLUST701		chrXII	605300	605432	-	tI(UAU)L	-13	na
chrXII	611791	611792	-	0	2644	0	0	1	0	SITE4106	CLUST702		chrXII	611532	611930	-	YLR235C	0	138
chrXII	628367	628368	+	111357	38942	91814	19	12	14	SITE4113	CLUST704		chrXII	628383	628497	+	tL(CAA)L	-16	na
chrXII	628369	628370	-	0	0	1614	0	0	1	SITE4115	CLUST704		chrXII	628383	628497	+	tL(CAA)L	-14	na
chrXII	628370	628371	-	26041	57572	16067	9	11	7	SITE4117	CLUST704		chrXII	628383	628497	+	tL(CAA)L	-13	na
chrXII	636256	636257	-	0	0	637	0	0	1	SITE4122	CLUST705		chrXII	634252	636084	+	YLR248W	173	na
chrXII	657016	657017	+	60	2162	12980	1	1	3	SITE4128	CLUST708		chrXII	656934	657006	-	tA(AGC)L	-10	na
chrXII	657017	657018	+	12158	10888	35421	2	2	6	SITE4130	CLUST708		chrXII	656934	657006	-	tA(AGC)L	-11	na
chrXII	657016	657017	-	0	109	0	0	1	0	SITE4131	CLUST708		chrXII	656934	657006	-	tA(AGC)L	-11	na
chrXII	657018	657019	+	6747	24149	45046	1	6	7	SITE4132	CLUST708		chrXII	656934	657006	-	tA(AGC)L	-12	na
chrXII	657019	657020	+	0	0	22371	0	0	2	SITE4135	CLUST708		chrXII	656934	657006	-	tA(AGC)L	-13	na
chrXII	657020	657021	+	0	15167	880	0	3	1	SITE4136	CLUST708		chrXII	656934	657006	-	tA(AGC)L	-14	na
chrXII	657019	657020	-	588	6672	0	1	1	0	SITE4137	CLUST708		chrXII	656934	657006	-	tA(AGC)L	-14	na
chrXII	657020	657021	-	436	37859	2507	2	5	2	SITE4138	CLUST708		chrXII	656934	657006	-	tA(AGC)L	-15	na
chrXII	657021	657022	-	0	24219	24092	0	7	3	SITE4140	CLUST708		chrXII	656934	657006	-	tA(AGC)L	-16	na
chrXII	657022	657023	-	12095	0	7995	1	0	1	SITE4142	CLUST708		chrXII	656934	657006	-	tA(AGC)L	-17	na
chrXII	657023	657024	-	15256	5407	9072	2	2	2	SITE4143	CLUST708		chrXII	656934	657006	-	tA(AGC)L	-18	na
chrXII	657024	657025	-	0	6989	0	0	1	0	SITE4144	CLUST708		chrXII	656934	657006	-	tA(AGC)L	-19	na
chrXII	673970	673971	-	0	1162	0	0	1	0	SITE4149	CLUST712		chrXII	673828	673944	-	YLR264C-A	-27	na
chrXII	687943	687944	+	0	6915	0	0	1	0	SITE4160	CLUST713		chrXII	687859	687932	-	tV(AAC)L	-11	na
chrXII	687942	687943	-	0	7228	0	0	1	0	SITE4161	CLUST713		chrXII	687859	687932	-	tV(AAC)L	-11	na
chrXII	687944	687945	+	16062	64469	86057	7	13	17	SITE4162	CLUST713		chrXII	687859	687932	-	tV(AAC)L	-12	na
chrXII	687945	687946	+	0	0	2491	0	0	1	SITE4163	CLUST713		chrXII	687859	687932	-	tV(AAC)L	-13	na
chrXII	687946	687947	+	0	9441	0	0	1	0	SITE4165	CLUST713		chrXII	687859	687932	-	tV(AAC)L	-14	na
chrXII	687946	687947	-	0	1149	0	0	1	0	SITE4167	CLUST713		chrXII	687859	687932	-	tV(AAC)L	-15	na
chrXII	687947	687948	-	86019	31943	35409	14	9	9	SITE4169	CLUST713		chrXII	687859	687932	-	tV(AAC)L	-16	na
chrXII	687949	687950	-	0	0	1962	0	0	1	SITE4171	CLUST713		chrXII	687859	687932	-	tV(AAC)L	-18	na
chrXII	692227	692228	-	0	1060	0	0	1	0	SITE4172	CLUST714		chrXII	691555	693882	+	YLR274W	0	673
chrXII	732069	732070	-	162	0	0	1	0	0	SITE4178	CLUST718		chrXII	732090	732190	+	tL(UAG)L2	-21	na
chrXII	732074	732075	+	43299	45057	31778	9	19	8	SITE4180	CLUST718		chrXII	732090	732190	+	tL(UAG)L2	-16	na
chrXII	732075	732076	+	346	3535	21501	1	2	3	SITE4181	CLUST718		chrXII	732090	732190	+	tL(UAG)L2	-15	na
chrXII	732076	732077	+	0	5231	0	0	2	0	SITE4182	CLUST718		chrXII	732090	732190	+	tL(UAG)L2	-14	na
chrXII	732077	732078	+	0	0	8429	0	0	1	SITE4183	CLUST718		chrXII	732090	732190	+	tL(UAG)L2	-13	na
chrXII	732077	732078	-	66285	66566	52473	9	18	16	SITE4185	CLUST718		chrXII	732090	732190	+	tL(UAG)L2	-13	na
chrXII	732078	732079	-	5781	6835	14049	2	1	3	SITE4186	CLUST718		chrXII	732090	732190	+	tL(UAG)L2	-12	na
chrXII	732080	732081	-	5198	12046	0	1	2	0	SITE4189	CLUST718		chrXII	732090	732190	+	tL(UAG)L2	-10	na
chrXII	732081	732082	-	0	1930	0	0	1	0	SITE4190	CLUST718		chrXII	732090	732190	+	tL(UAG)L2	-9	na
chrXII	734781	734782	+	7124	0	0	1	0	0	SITE4193	CLUST719		chrXII	734802	734875	+	tI(AAU)L1	-21	na
chrXII	734785	734786	+	0	0	6184	0	0	3	SITE4194	CLUST719		chrXII	734802	734875	+	tI(AAU)L1	-17	na
chrXII	734786	734787	+	6836	8102	15734	3	5	5	SITE4195	CLUST719		chrXII	734802	734875	+	tI(AAU)L1	-16	na
chrXII	734787	734788	+	1181	7944	17226	2	6	5	SITE4196	CLUST719		chrXII	734802	734875	+	tI(AAU)L1	-15	na
chrXII	734788	734789	+	0	1182	0	0	1	0	SITE4197	CLUST719		chrXII	734802	734875	+	tI(AAU)L1	-14	na
chrXII	734789	734790	+	511	0	0	1	0	0	SITE4198	CLUST719		chrXII	734802	734875	+	tI(AAU)L1	-13	na
chrXII	734789	734790	-	917	1804	8965	3	3	5	SITE4200	CLUST719		chrXII	734802	734875	+	tI(AAU)L1	-13	na
chrXII	734790	734791	+	0	0	2033	0	0	1	SITE4201	CLUST719		chrXII	734802	734875	+	tI(AAU)L1	-12	na
chrXII	734791	734792	+	7393	0	0	1	0	0	SITE4202	CLUST719		chrXII	734802	734875	+	tI(AAU)L1	-11	na
chrXII	734790	734791	-	637	30561	23416	3	6	3	SITE4203	CLUST719		chrXII	734802	734875	+	tI(AAU)L1	-12	na
chrXII	734791	734792	-	199	3645	83	1	2	1	SITE4204	CLUST719		chrXII	734802	734875	+	tI(AAU)L1	-11	na
chrXII	734792	734793	-	0	0	2757	0	0	1	SITE4205	CLUST719		chrXII	734802	734875	+	tI(AAU)L1	-10	na
chrXII	734793	734794	-	0	2009	660	0	1	1	SITE4206	CLUST719		chrXII	734802	734875	+	tI(AAU)L1	-9	na
chrXII	734794	734795	-	0	9719	6169	0	2	3	SITE4207	CLUST719		chrXII	734802	734875	+	tI(AAU)L1	-8	na
chrXII	743941	743942	+	0	0	7409	0	0	1	SITE4209	CLUST720		chrXII	738161	743863	-	YLR305C	-78	na
chrXII	784339	784340	+	0	0	3703	0	0	1	SITE4216	CLUST723		chrXII	784354	784453	+	tS(GCU)L	-15	na
chrXII	784341	784342	+	847	1487	535	2	2	2	SITE4217	CLUST723		chrXII	784354	784453	+	tS(GCU)L	-13	na
chrXII	784342	784343	-	0	0	10045	0	0	1	SITE4221	CLUST723		chrXII	784354	784453	+	tS(GCU)L	-12	na
chrXII	784344	784345	+	31408	76171	101552	20	22	23	SITE4224	CLUST723		chrXII	784354	784453	+	tS(GCU)L	-10	na
chrXII	784344	784345	-	19788	13321	0	1	1	0	SITE4226	CLUST723		chrXII	784354	784453	+	tS(GCU)L	-10	na
chrXII	784346	784347	-	0	3430	0	0	1	0	SITE4228	CLUST723		chrXII	784354	784453	+	tS(GCU)L	-8	na
chrXII	784347	784348	-	80870	129708	138117	16	27	25	SITE4229	CLUST723		chrXII	784354	784453	+	tS(GCU)L	-7	na
chrXII	784348	784349	-	9817	0	9173	1	0	1	SITE4230	CLUST723		chrXII	784354	784453	+	tS(GCU)L	-6	na
chrXII	784357	784358	-	0	762	0	0	1	0	SITE4231	CLUST723		chrXII	784354	784453	+	tS(GCU)L	0	4
chrXII	793899	793900	+	0	0	4834	0	0	1	SITE4234	CLUST724		chrXII	793918	793989	+	tD(GUC)L2	-19	na
chrXII	793900	793901	+	0	5853	0	0	1	0	SITE4235	CLUST724		chrXII	793918	793989	+	tD(GUC)L2	-18	na
chrXII	793901	793902	+	20772	40227	45389	13	21	12	SITE4236	CLUST724		chrXII	793918	793989	+	tD(GUC)L2	-17	na
chrXII	793902	793903	+	10317	8309	2536	2	2	1	SITE4237	CLUST724		chrXII	793918	793989	+	tD(GUC)L2	-16	na
chrXII	793902	793903	-	0	4233	0	0	1	0	SITE4238	CLUST724		chrXII	793918	793989	+	tD(GUC)L2	-16	na
chrXII	793903	793904	-	0	1573	0	0	2	0	SITE4240	CLUST724		chrXII	793918	793989	+	tD(GUC)L2	-15	na
chrXII	793904	793905	-	45891	30642	141647	11	12	30	SITE4241	CLUST724		chrXII	793918	793989	+	tD(GUC)L2	-14	na
chrXII	793905	793906	-	1234	4802	8327	2	1	4	SITE4243	CLUST724		chrXII	793918	793989	+	tD(GUC)L2	-13	na
chrXII	793906	793907	+	0	0	3425	0	0	1	SITE4244	CLUST724		chrXII	793918	793989	+	tD(GUC)L2	-12	na
chrXII	793906	793907	-	0	2494	0	0	1	0	SITE4245	CLUST724		chrXII	793918	793989	+	tD(GUC)L2	-12	na
chrXII	793908	793909	-	0	884	0	0	1	0	SITE4247	CLUST724		chrXII	793918	793989	+	tD(GUC)L2	-10	na
chrXII	797162	797163	+	118146	134561	132505	23	44	38	SITE4249	CLUST725		chrXII	797178	797249	+	tE(UUC)L	-16	na
chrXII	797164	797165	-	25164	0	0	4	0	0	SITE4253	CLUST725		chrXII	797178	797249	+	tE(UUC)L	-14	na
chrXII	797165	797166	-	110763	159372	310284	32	40	51	SITE4254	CLUST725		chrXII	797178	797249	+	tE(UUC)L	-13	na
chrXII	797166	797167	+	545	0	0	1	0	0	SITE4255	CLUST725		chrXII	797178	797249	+	tE(UUC)L	-12	na
chrXII	797167	797168	-	9822	0	0	1	0	0	SITE4257	CLUST725		chrXII	797178	797249	+	tE(UUC)L	-11	na
chrXII	797169	797170	-	0	0	9474	0	0	4	SITE4259	CLUST725		chrXII	797178	797249	+	tE(UUC)L	-9	na
chrXII	808952	808953	+	903	0	0	1	0	0	SITE4263	CLUST727		chrXII	807385	808818	+	YLR341W	135	na
chrXII	818590	818591	+	13881	32552	77439	14	8	13	SITE4265	CLUST728		chrXII	818609	818680	+	tR(CCG)L	-19	na
chrXII	818591	818592	+	283	5855	2157	1	3	1	SITE4266	CLUST728		chrXII	818609	818680	+	tR(CCG)L	-18	na
chrXII	818592	818593	+	1542	20733	45620	2	3	5	SITE4267	CLUST728		chrXII	818609	818680	+	tR(CCG)L	-17	na
chrXII	818593	818594	-	2488	21191	17668	7	15	12	SITE4269	CLUST728		chrXII	818609	818680	+	tR(CCG)L	-16	na
chrXII	818594	818595	+	52127	70995	87533	9	23	21	SITE4270	CLUST728		chrXII	818609	818680	+	tR(CCG)L	-15	na
chrXII	818594	818595	-	0	4631	8405	0	3	2	SITE4272	CLUST728		chrXII	818609	818680	+	tR(CCG)L	-15	na
chrXII	818595	818596	-	294	1760	3075	1	2	1	SITE4273	CLUST728		chrXII	818609	818680	+	tR(CCG)L	-14	na
chrXII	818596	818597	-	1045	0	0	1	0	0	SITE4274	CLUST728		chrXII	818609	818680	+	tR(CCG)L	-13	na
chrXII	818597	818598	-	3826	26496	22294	7	20	14	SITE4275	CLUST728		chrXII	818609	818680	+	tR(CCG)L	-12	na
chrXII	826828	826829	+	0	2336	0	0	1	0	SITE4277	CLUST729		chrXII	826977	827873	-	YLR348C	1045	na
chrXII	875358	875359	+	5524	4203	0	2	1	0	SITE4290	CLUST734		chrXII	875376	875471	+	tK(UUU)L	-18	na
chrXII	875360	875361	+	6027	0	13444	4	0	3	SITE4292	CLUST734		chrXII	875376	875471	+	tK(UUU)L	-16	na
chrXII	875361	875362	+	0	0	10575	0	0	1	SITE4294	CLUST734		chrXII	875376	875471	+	tK(UUU)L	-15	na
chrXII	875361	875362	-	9972	0	0	2	0	0	SITE4295	CLUST734		chrXII	875376	875471	+	tK(UUU)L	-15	na
chrXII	875363	875364	+	0	1545	6927	0	1	1	SITE4296	CLUST734		chrXII	875376	875471	+	tK(UUU)L	-13	na
chrXII	875363	875364	-	2924	5176	19693	1	2	2	SITE4298	CLUST734		chrXII	875376	875471	+	tK(UUU)L	-13	na
chrXII	875365	875366	+	0	1337	0	0	1	0	SITE4299	CLUST734		chrXII	875376	875471	+	tK(UUU)L	-11	na
chrXII	875366	875367	-	0	1625	2734	0	1	1	SITE4300	CLUST734		chrXII	875376	875471	+	tK(UUU)L	-10	na
chrXII	875368	875369	-	85	0	10782	1	0	3	SITE4302	CLUST734		chrXII	875376	875471	+	tK(UUU)L	-8	na
chrXII	963056	963057	-	0	0	1471	0	0	1	SITE4317	CLUST738		chrXII	962972	963055	-	tL(UAA)L	-2	na
chrXII	963061	963062	+	0	2194	7087	0	2	1	SITE4318	CLUST738		chrXII	962972	963055	-	tL(UAA)L	-6	na
chrXII	963063	963064	+	263	951	18004	1	2	2	SITE4320	CLUST738		chrXII	962972	963055	-	tL(UAA)L	-8	na
chrXII	963064	963065	-	13602	4230	6940	1	1	1	SITE4322	CLUST738		chrXII	962972	963055	-	tL(UAA)L	-10	na
chrXII	963065	963066	+	14107	13249	6677	2	2	2	SITE4323	CLUST738		chrXII	962972	963055	-	tL(UAA)L	-10	na
chrXII	963066	963067	+	84962	59198	24162	15	15	11	SITE4324	CLUST738		chrXII	962972	963055	-	tL(UAA)L	-11	na
chrXII	963067	963068	+	11958	76793	34323	5	8	8	SITE4325	CLUST738		chrXII	962972	963055	-	tL(UAA)L	-12	na
chrXII	963066	963067	-	1078	4951	12322	3	3	4	SITE4326	CLUST738		chrXII	962972	963055	-	tL(UAA)L	-12	na
chrXII	963068	963069	+	14364	28279	14634	5	6	5	SITE4327	CLUST738		chrXII	962972	963055	-	tL(UAA)L	-13	na
chrXII	963069	963070	+	9081	86419	31958	4	13	5	SITE4329	CLUST738		chrXII	962972	963055	-	tL(UAA)L	-14	na
chrXII	963068	963069	-	11360	6145	0	2	1	0	SITE4330	CLUST738		chrXII	962972	963055	-	tL(UAA)L	-14	na
chrXII	963070	963071	+	129	512	0	1	1	0	SITE4331	CLUST738		chrXII	962972	963055	-	tL(UAA)L	-15	na
chrXII	963069	963070	-	115340	33639	36514	15	12	9	SITE4332	CLUST738		chrXII	962972	963055	-	tL(UAA)L	-15	na
chrXII	963070	963071	-	24782	12709	36882	3	5	8	SITE4333	CLUST738		chrXII	962972	963055	-	tL(UAA)L	-16	na
chrXII	963071	963072	+	240	479	217	2	3	1	SITE4334	CLUST738		chrXII	962972	963055	-	tL(UAA)L	-16	na
chrXII	963071	963072	-	92	5297	27046	1	1	3	SITE4335	CLUST738		chrXII	962972	963055	-	tL(UAA)L	-17	na
chrXII	963072	963073	+	0	228	0	0	1	0	SITE4336	CLUST738		chrXII	962972	963055	-	tL(UAA)L	-17	na
chrXII	963072	963073	-	41426	10958	10787	7	5	6	SITE4337	CLUST738		chrXII	962972	963055	-	tL(UAA)L	-18	na
chrXII	963078	963079	-	128	0	0	1	0	0	SITE4341	CLUST738		chrXII	962972	963055	-	tL(UAA)L	-24	na
chrXII	976061	976062	+	2405	0	0	1	0	0	SITE4344	CLUST740		chrXII	975983	976056	-	tN(GUU)L	-5	na
chrXII	976066	976067	+	4672	0	0	1	0	0	SITE4345	CLUST740		chrXII	975983	976056	-	tN(GUU)L	-10	na
chrXII	976067	976068	+	0	950	1192	0	1	1	SITE4346	CLUST740		chrXII	975983	976056	-	tN(GUU)L	-11	na
chrXII	976068	976069	+	31961	40048	24405	17	16	12	SITE4347	CLUST740		chrXII	975983	976056	-	tN(GUU)L	-12	na
chrXII	976069	976070	+	11601	10911	6148	11	4	7	SITE4349	CLUST740		chrXII	975983	976056	-	tN(GUU)L	-13	na
chrXII	976071	976072	-	8164	12022	13054	3	9	11	SITE4353	CLUST740		chrXII	975983	976056	-	tN(GUU)L	-16	na
chrXII	976072	976073	-	6503	20974	27564	4	9	13	SITE4354	CLUST740		chrXII	975983	976056	-	tN(GUU)L	-17	na
chrXII	993014	993015	+	0	0	2235	0	0	1	SITE4358	CLUST741		chrXII	990777	992732	+	YLR429W	283	na
chrXII	1041287	1041288	+	0	2120	0	0	1	0	SITE4361	CLUST744		chrXII	1039270	1041366	-	YLR452C	0	79
chrXII	1052155	1052156	+	1353	3501	0	1	1	0	SITE4367	CLUST746		chrXII	1052071	1052144	-	tI(AAU)L2	-11	na
chrXII	1052156	1052157	+	13346	40371	3014	5	6	3	SITE4368	CLUST746		chrXII	1052071	1052144	-	tI(AAU)L2	-12	na
chrXII	1052158	1052159	-	0	2020	0	0	1	0	SITE4372	CLUST746		chrXII	1052071	1052144	-	tI(AAU)L2	-15	na
chrXII	1052159	1052160	-	573	8903	31280	3	2	3	SITE4373	CLUST746		chrXII	1052071	1052144	-	tI(AAU)L2	-16	na
chrXII	1052162	1052163	-	0	0	11287	0	0	1	SITE4375	CLUST746		chrXII	1052071	1052144	-	tI(AAU)L2	-19	na
chrXII	1052174	1052175	+	0	428	0	0	1	0	SITE4377	CLUST746		chrXII	1052071	1052144	-	tI(AAU)L2	-30	na
chrXIII	20748	20749	+	55	0	7571	1	0	1	SITE4381	CLUST747		chrXIII	20761	21699	-	YML125C	951	na
chrXIII	70530	70531	+	0	0	8187	0	0	1	SITE4386	CLUST750		chrXIII	70624	73920	+	YML100W	-94	na
chrXIII	91954	91955	+	0	1403	0	0	1	0	SITE4393	CLUST752		chrXIII	91962	91970	+	ZOD1	-8	na
chrXIII	91965	91966	+	143003	45481	78153	23	16	23	SITE4398	CLUST752		chrXIII	91962	91970	+	ZOD1	0	3
chrXIII	91966	91967	-	0	1342	0	0	1	0	SITE4400	CLUST752		chrXIII	91962	91970	+	ZOD1	0	5
chrXIII	91967	91968	-	0	0	7292	0	0	1	SITE4401	CLUST752		chrXIII	91962	91970	+	ZOD1	0	6
chrXIII	91968	91969	-	37077	48037	99044	17	23	30	SITE4402	CLUST752		chrXIII	91962	91970	+	ZOD1	0	7
chrXIII	91969	91970	-	2733	1394	0	1	1	0	SITE4403	CLUST752		chrXIII	91962	91970	+	ZOD1	0	8
chrXIII	131906	131907	+	0	861	8154	0	1	1	SITE4406	CLUST753		chrXIII	131825	131896	-	tR(UCU)M2	-10	na
chrXIII	131907	131908	+	37349	27816	41620	9	8	12	SITE4407	CLUST753		chrXIII	131825	131896	-	tR(UCU)M2	-11	na
chrXIII	131908	131909	+	0	5397	4305	0	1	1	SITE4409	CLUST753		chrXIII	131825	131896	-	tR(UCU)M2	-12	na
chrXIII	131909	131910	+	0	6825	0	0	1	0	SITE4410	CLUST753		chrXIII	131825	131896	-	tR(UCU)M2	-13	na
chrXIII	131909	131910	-	2455	1445	0	1	1	0	SITE4411	CLUST753		chrXIII	131825	131896	-	tR(UCU)M2	-14	na
chrXIII	131910	131911	-	143852	10544	28379	13	7	8	SITE4413	CLUST753		chrXIII	131825	131896	-	tR(UCU)M2	-15	na
chrXIII	131911	131912	-	165	866	0	1	1	0	SITE4414	CLUST753		chrXIII	131825	131896	-	tR(UCU)M2	-16	na
chrXIII	131914	131915	-	0	3216	0	0	1	0	SITE4416	CLUST753		chrXIII	131825	131896	-	tR(UCU)M2	-19	na
chrXIII	131915	131916	-	0	2198	222	0	1	1	SITE4417	CLUST753		chrXIII	131825	131896	-	tR(UCU)M2	-20	na
chrXIII	168767	168768	+	0	3550	0	0	1	0	SITE4424	CLUST756		chrXIII	168795	168883	+	tY(GUA)M1	-28	na
chrXIII	168769	168770	+	1819	8860	1050	1	2	1	SITE4426	CLUST756		chrXIII	168795	168883	+	tY(GUA)M1	-26	na
chrXIII	168772	168773	+	0	2330	0	0	1	0	SITE4428	CLUST756		chrXIII	168795	168883	+	tY(GUA)M1	-23	na
chrXIII	168772	168773	-	0	15079	0	0	1	0	SITE4430	CLUST756		chrXIII	168795	168883	+	tY(GUA)M1	-23	na
chrXIII	168776	168777	+	6350	0	0	1	0	0	SITE4431	CLUST756		chrXIII	168795	168883	+	tY(GUA)M1	-19	na
chrXIII	168775	168776	-	0	0	1800	0	0	1	SITE4432	CLUST756		chrXIII	168795	168883	+	tY(GUA)M1	-20	na
chrXIII	168777	168778	+	319	0	16313	1	0	2	SITE4433	CLUST756		chrXIII	168795	168883	+	tY(GUA)M1	-18	na
chrXIII	168778	168779	+	8921	1954	14545	1	1	2	SITE4435	CLUST756		chrXIII	168795	168883	+	tY(GUA)M1	-17	na
chrXIII	168780	168781	+	25366	27217	67198	10	9	10	SITE4439	CLUST756		chrXIII	168795	168883	+	tY(GUA)M1	-15	na
chrXIII	168780	168781	-	304	8261	1182	2	2	1	SITE4440	CLUST756		chrXIII	168795	168883	+	tY(GUA)M1	-15	na
chrXIII	168782	168783	+	1213	0	0	1	0	0	SITE4442	CLUST756		chrXIII	168795	168883	+	tY(GUA)M1	-13	na
chrXIII	168781	168782	-	154	14287	7281	1	2	1	SITE4443	CLUST756		chrXIII	168795	168883	+	tY(GUA)M1	-14	na
chrXIII	168782	168783	-	0	4286	11237	0	1	2	SITE4444	CLUST756		chrXIII	168795	168883	+	tY(GUA)M1	-13	na
chrXIII	168783	168784	-	3042	75641	47059	10	14	17	SITE4445	CLUST756		chrXIII	168795	168883	+	tY(GUA)M1	-12	na
chrXIII	168785	168786	+	0	612	0	0	1	0	SITE4446	CLUST756		chrXIII	168795	168883	+	tY(GUA)M1	-10	na
chrXIII	168784	168785	-	260	0	0	1	0	0	SITE4447	CLUST756		chrXIII	168795	168883	+	tY(GUA)M1	-11	na
chrXIII	168785	168786	-	132	0	14181	1	0	1	SITE4448	CLUST756		chrXIII	168795	168883	+	tY(GUA)M1	-10	na
chrXIII	168792	168793	-	0	0	10264	0	0	1	SITE4451	CLUST756		chrXIII	168795	168883	+	tY(GUA)M1	-3	na
chrXIII	168800	168801	-	0	3718	0	0	1	0	SITE4453	CLUST756		chrXIII	168795	168883	+	tY(GUA)M1	0	6
chrXIII	183977	183978	+	0	0	924	0	0	1	SITE4461	CLUST758		chrXIII	183898	183968	-	tG(GCC)M	-9	na
chrXIII	183979	183980	+	682	9882	4672	1	2	1	SITE4462	CLUST758		chrXIII	183898	183968	-	tG(GCC)M	-11	na
chrXIII	183978	183979	-	0	66	0	0	1	0	SITE4463	CLUST758		chrXIII	183898	183968	-	tG(GCC)M	-11	na
chrXIII	183980	183981	+	58152	137933	179291	16	23	23	SITE4464	CLUST758		chrXIII	183898	183968	-	tG(GCC)M	-12	na
chrXIII	183981	183982	+	0	0	61	0	0	1	SITE4465	CLUST758		chrXIII	183898	183968	-	tG(GCC)M	-13	na
chrXIII	183980	183981	-	0	0	3033	0	0	1	SITE4466	CLUST758		chrXIII	183898	183968	-	tG(GCC)M	-13	na
chrXIII	183982	183983	-	67	6715	15610	1	3	2	SITE4469	CLUST758		chrXIII	183898	183968	-	tG(GCC)M	-15	na
chrXIII	183983	183984	-	89982	57625	134618	14	23	25	SITE4470	CLUST758		chrXIII	183898	183968	-	tG(GCC)M	-16	na
chrXIII	183984	183985	-	29117	0	0	1	0	0	SITE4471	CLUST758		chrXIII	183898	183968	-	tG(GCC)M	-17	na
chrXIII	183990	183991	-	0	0	18815	0	0	1	SITE4475	CLUST758		chrXIII	183898	183968	-	tG(GCC)M	-23	na
chrXIII	196181	196182	+	0	190	0	0	1	0	SITE4479	CLUST759		chrXIII	196068	196170	-	tP(UGG)M	-11	na
chrXIII	196183	196184	+	78963	163069	91113	25	44	32	SITE4482	CLUST759		chrXIII	196068	196170	-	tP(UGG)M	-13	na
chrXIII	196184	196185	-	0	370	3757	0	1	1	SITE4485	CLUST759		chrXIII	196068	196170	-	tP(UGG)M	-15	na
chrXIII	196186	196187	-	117123	129910	113356	17	32	30	SITE4487	CLUST759		chrXIII	196068	196170	-	tP(UGG)M	-17	na
chrXIII	196191	196192	+	0	56	0	0	1	0	SITE4490	CLUST759		chrXIII	196068	196170	-	tP(UGG)M	-21	na
chrXIII	259250	259251	+	47050	21115	43613	9	8	11	SITE4512	CLUST765		chrXIII	259158	259239	-	tS(AGA)M	-11	na
chrXIII	259252	259253	+	1546	3806	20327	2	1	2	SITE4514	CLUST765		chrXIII	259158	259239	-	tS(AGA)M	-13	na
chrXIII	259253	259254	+	0	0	11901	0	0	2	SITE4516	CLUST765		chrXIII	259158	259239	-	tS(AGA)M	-14	na
chrXIII	259253	259254	-	107628	13686	130859	13	12	20	SITE4517	CLUST765		chrXIII	259158	259239	-	tS(AGA)M	-15	na
chrXIII	259255	259256	-	1312	0	7994	4	0	1	SITE4520	CLUST765		chrXIII	259158	259239	-	tS(AGA)M	-17	na
chrXIII	259256	259257	-	0	0	153	0	0	1	SITE4521	CLUST765		chrXIII	259158	259239	-	tS(AGA)M	-18	na
chrXIII	290773	290774	+	0	6145	0	0	1	0	SITE4533	CLUST770		chrXIII	290801	290872	+	tE(UUC)M	-28	na
chrXIII	290774	290775	+	0	0	1698	0	0	1	SITE4534	CLUST770		chrXIII	290801	290872	+	tE(UUC)M	-27	na
chrXIII	290782	290783	+	1032	280	0	2	1	0	SITE4535	CLUST770		chrXIII	290801	290872	+	tE(UUC)M	-19	na
chrXIII	290784	290785	+	71961	25310	43796	8	14	11	SITE4536	CLUST770		chrXIII	290801	290872	+	tE(UUC)M	-17	na
chrXIII	290785	290786	-	0	6670	747	0	1	1	SITE4539	CLUST770		chrXIII	290801	290872	+	tE(UUC)M	-16	na
chrXIII	290786	290787	-	173	0	0	1	0	0	SITE4540	CLUST770		chrXIII	290801	290872	+	tE(UUC)M	-15	na
chrXIII	290787	290788	-	2299	44831	36789	5	14	14	SITE4541	CLUST770		chrXIII	290801	290872	+	tE(UUC)M	-14	na
chrXIII	290788	290789	-	0	8791	0	0	1	0	SITE4542	CLUST770		chrXIII	290801	290872	+	tE(UUC)M	-13	na
chrXIII	290790	290791	+	0	0	758	0	0	1	SITE4543	CLUST770		chrXIII	290801	290872	+	tE(UUC)M	-11	na
chrXIII	321226	321227	+	0	0	674	0	0	1	SITE4550	CLUST774		chrXIII	321147	321219	-	tA(AGC)M1	-7	na
chrXIII	321228	321229	+	0	0	672	0	0	1	SITE4551	CLUST774		chrXIII	321147	321219	-	tA(AGC)M1	-9	na
chrXIII	321230	321231	+	7849	22847	7742	7	13	9	SITE4553	CLUST774		chrXIII	321147	321219	-	tA(AGC)M1	-11	na
chrXIII	321231	321232	+	6148	20529	14091	13	13	15	SITE4554	CLUST774		chrXIII	321147	321219	-	tA(AGC)M1	-12	na
chrXIII	321233	321234	+	0	450	0	0	1	0	SITE4559	CLUST774		chrXIII	321147	321219	-	tA(AGC)M1	-14	na
chrXIII	321233	321234	-	36865	21785	31853	8	8	5	SITE4560	CLUST774		chrXIII	321147	321219	-	tA(AGC)M1	-15	na
chrXIII	321234	321235	-	81975	44123	88394	8	9	19	SITE4561	CLUST774		chrXIII	321147	321219	-	tA(AGC)M1	-16	na
chrXIII	321236	321237	-	0	1282	0	0	1	0	SITE4563	CLUST774		chrXIII	321147	321219	-	tA(AGC)M1	-18	na
chrXIII	352258	352259	+	0	0	6137	0	0	1	SITE4575	CLUST779		chrXIII	352280	352370	+	tF(GAA)M	-22	na
chrXIII	352262	352263	+	101927	28566	25432	10	9	7	SITE4578	CLUST779		chrXIII	352280	352370	+	tF(GAA)M	-18	na
chrXIII	352263	352264	+	2532	9781	42161	6	4	9	SITE4579	CLUST779		chrXIII	352280	352370	+	tF(GAA)M	-17	na
chrXIII	352263	352264	-	0	0	5711	0	0	1	SITE4580	CLUST779		chrXIII	352280	352370	+	tF(GAA)M	-17	na
chrXIII	352264	352265	+	47466	23658	4499	2	5	4	SITE4581	CLUST779		chrXIII	352280	352370	+	tF(GAA)M	-16	na
chrXIII	352265	352266	+	15216	4148	0	1	1	0	SITE4582	CLUST779		chrXIII	352280	352370	+	tF(GAA)M	-15	na
chrXIII	352264	352265	-	0	573	0	0	1	0	SITE4583	CLUST779		chrXIII	352280	352370	+	tF(GAA)M	-16	na
chrXIII	352265	352266	-	25478	7997	14283	8	2	6	SITE4584	CLUST779		chrXIII	352280	352370	+	tF(GAA)M	-15	na
chrXIII	352266	352267	+	1460	0	0	1	0	0	SITE4585	CLUST779		chrXIII	352280	352370	+	tF(GAA)M	-14	na
chrXIII	352266	352267	-	25981	3391	24179	5	3	4	SITE4586	CLUST779		chrXIII	352280	352370	+	tF(GAA)M	-14	na
chrXIII	352267	352268	-	52071	26944	23951	10	8	3	SITE4587	CLUST779		chrXIII	352280	352370	+	tF(GAA)M	-13	na
chrXIII	352269	352270	+	0	4273	3230	0	2	1	SITE4588	CLUST779		chrXIII	352280	352370	+	tF(GAA)M	-11	na
chrXIII	352269	352270	-	0	0	1046	0	0	1	SITE4589	CLUST779		chrXIII	352280	352370	+	tF(GAA)M	-11	na
chrXIII	352271	352272	-	99	0	77	1	0	1	SITE4592	CLUST779		chrXIII	352280	352370	+	tF(GAA)M	-9	na
chrXIII	352275	352276	-	205	0	0	1	0	0	SITE4593	CLUST779		chrXIII	352280	352370	+	tF(GAA)M	-5	na
chrXIII	352276	352277	-	8770	0	0	1	0	0	SITE4594	CLUST779		chrXIII	352280	352370	+	tF(GAA)M	-4	na
chrXIII	363046	363047	+	0	0	1940	0	0	1	SITE4595	CLUST780		chrXIII	363064	363135	+	tH(GUG)M	-18	na
chrXIII	363047	363048	+	4992	36160	11739	4	6	3	SITE4596	CLUST780		chrXIII	363064	363135	+	tH(GUG)M	-17	na
chrXIII	363048	363049	+	0	0	1092	0	0	1	SITE4598	CLUST780		chrXIII	363064	363135	+	tH(GUG)M	-16	na
chrXIII	363049	363050	+	0	879	17045	0	2	2	SITE4600	CLUST780		chrXIII	363064	363135	+	tH(GUG)M	-15	na
chrXIII	363049	363050	-	51	3772	0	1	1	0	SITE4601	CLUST780		chrXIII	363064	363135	+	tH(GUG)M	-15	na
chrXIII	363050	363051	-	23984	38517	79812	3	7	12	SITE4603	CLUST780		chrXIII	363064	363135	+	tH(GUG)M	-14	na
chrXIII	363051	363052	+	15225	8739	6378	4	3	3	SITE4604	CLUST780		chrXIII	363064	363135	+	tH(GUG)M	-13	na
chrXIII	363051	363052	-	9820	0	9655	2	0	2	SITE4605	CLUST780		chrXIII	363064	363135	+	tH(GUG)M	-13	na
chrXIII	363053	363054	+	6235	1627	14108	1	1	2	SITE4607	CLUST780		chrXIII	363064	363135	+	tH(GUG)M	-11	na
chrXIII	363052	363053	-	23767	7161	2766	3	3	1	SITE4608	CLUST780		chrXIII	363064	363135	+	tH(GUG)M	-12	na
chrXIII	363053	363054	-	0	0	2995	0	0	1	SITE4609	CLUST780		chrXIII	363064	363135	+	tH(GUG)M	-11	na
chrXIII	363054	363055	-	35645	9723	0	7	2	0	SITE4611	CLUST780		chrXIII	363064	363135	+	tH(GUG)M	-10	na
chrXIII	363055	363056	-	16780	0	0	1	0	0	SITE4612	CLUST780		chrXIII	363064	363135	+	tH(GUG)M	-9	na
chrXIII	363056	363057	-	20812	9015	3779	2	2	2	SITE4613	CLUST780		chrXIII	363064	363135	+	tH(GUG)M	-8	na
chrXIII	372529	372530	+	68880	21494	24211	16	8	11	SITE4619	CLUST781		chrXIII	372445	372518	-	tV(AAC)M1	-11	na
chrXIII	372530	372531	+	0	3705	8164	0	1	3	SITE4620	CLUST781		chrXIII	372445	372518	-	tV(AAC)M1	-12	na
chrXIII	372531	372532	+	0	1452	4304	0	1	1	SITE4621	CLUST781		chrXIII	372445	372518	-	tV(AAC)M1	-13	na
chrXIII	372532	372533	-	9177	44496	64521	4	11	10	SITE4623	CLUST781		chrXIII	372445	372518	-	tV(AAC)M1	-15	na
chrXIII	372534	372535	-	34952	20762	0	1	3	0	SITE4625	CLUST781		chrXIII	372445	372518	-	tV(AAC)M1	-17	na
chrXIII	379418	379419	+	0	0	1188	0	0	1	SITE4630	CLUST782		chrXIII	379303	379408	-	tW(CCA)M	-10	na
chrXIII	379419	379420	+	83064	109234	122923	20	35	26	SITE4632	CLUST782		chrXIII	379303	379408	-	tW(CCA)M	-11	na
chrXIII	379420	379421	+	27373	11333	13125	5	5	6	SITE4635	CLUST782		chrXIII	379303	379408	-	tW(CCA)M	-12	na
chrXIII	379421	379422	+	0	788	16133	0	1	1	SITE4636	CLUST782		chrXIII	379303	379408	-	tW(CCA)M	-13	na
chrXIII	379420	379421	-	13807	0	0	1	0	0	SITE4637	CLUST782		chrXIII	379303	379408	-	tW(CCA)M	-13	na
chrXIII	379422	379423	+	0	3122	0	0	1	0	SITE4639	CLUST782		chrXIII	379303	379408	-	tW(CCA)M	-14	na
chrXIII	379422	379423	-	39157	47670	99901	13	21	20	SITE4640	CLUST782		chrXIII	379303	379408	-	tW(CCA)M	-15	na
chrXIII	379423	379424	-	82986	25993	60153	8	11	12	SITE4642	CLUST782		chrXIII	379303	379408	-	tW(CCA)M	-16	na
chrXIII	411327	411328	-	0	8021	0	0	1	0	SITE4648	CLUST784		chrXIII	410762	411265	-	YMR071C	-63	na
chrXIII	411577	411578	+	0	0	635	0	0	1	SITE4649	CLUST785		chrXIII	411569	412120	+	YMR072W	0	8
chrXIII	420672	420673	+	38806	87505	64596	16	29	21	SITE4656	CLUST789		chrXIII	420588	420661	-	tV(AAC)M2	-11	na
chrXIII	420673	420674	+	6774	2307	0	1	1	0	SITE4658	CLUST789		chrXIII	420588	420661	-	tV(AAC)M2	-12	na
chrXIII	420675	420676	-	63888	95840	147553	16	18	21	SITE4661	CLUST789		chrXIII	420588	420661	-	tV(AAC)M2	-15	na
chrXIII	420676	420677	-	0	0	5945	0	0	1	SITE4662	CLUST789		chrXIII	420588	420661	-	tV(AAC)M2	-16	na
chrXIII	463519	463520	+	0	5233	0	0	1	0	SITE4666	CLUST790		chrXIII	463554	463625	+	tD(GUC)M	-35	na
chrXIII	463527	463528	+	1307	0	0	1	0	0	SITE4668	CLUST790		chrXIII	463554	463625	+	tD(GUC)M	-27	na
chrXIII	463529	463530	+	1020	4319	0	1	1	0	SITE4669	CLUST790		chrXIII	463554	463625	+	tD(GUC)M	-25	na
chrXIII	463532	463533	-	0	2935	0	0	2	0	SITE4670	CLUST790		chrXIII	463554	463625	+	tD(GUC)M	-22	na
chrXIII	463538	463539	+	4165	23160	35318	6	9	9	SITE4672	CLUST790		chrXIII	463554	463625	+	tD(GUC)M	-16	na
chrXIII	463541	463542	-	73613	86068	81031	14	16	16	SITE4678	CLUST790		chrXIII	463554	463625	+	tD(GUC)M	-13	na
chrXIII	480700	480701	+	4649	0	0	2	0	0	SITE4687	CLUST792		chrXIII	480621	480693	-	tK(CUU)M	-7	na
chrXIII	480702	480703	+	0	902	0	0	1	0	SITE4689	CLUST792		chrXIII	480621	480693	-	tK(CUU)M	-9	na
chrXIII	480703	480704	+	0	1232	0	0	1	0	SITE4690	CLUST792		chrXIII	480621	480693	-	tK(CUU)M	-10	na
chrXIII	480704	480705	+	3157	1550	11212	4	2	3	SITE4691	CLUST792		chrXIII	480621	480693	-	tK(CUU)M	-11	na
chrXIII	480705	480706	+	39328	42145	33181	14	19	20	SITE4692	CLUST792		chrXIII	480621	480693	-	tK(CUU)M	-12	na
chrXIII	480704	480705	-	207	8806	4752	1	3	2	SITE4693	CLUST792		chrXIII	480621	480693	-	tK(CUU)M	-12	na
chrXIII	480707	480708	-	1623	4008	29954	2	3	9	SITE4696	CLUST792		chrXIII	480621	480693	-	tK(CUU)M	-15	na
chrXIII	480708	480709	-	65828	33700	132363	15	15	28	SITE4697	CLUST792		chrXIII	480621	480693	-	tK(CUU)M	-16	na
chrXIII	480709	480710	-	0	0	2951	0	0	1	SITE4698	CLUST792		chrXIII	480621	480693	-	tK(CUU)M	-17	na
chrXIII	480717	480718	-	0	0	3623	0	0	1	SITE4701	CLUST792		chrXIII	480621	480693	-	tK(CUU)M	-25	na
chrXIII	494853	494854	+	0	0	20586	0	0	1	SITE4703	CLUST793		chrXIII	494999	496282	+	YMR113W	-146	na
chrXIII	504879	504880	+	102881	78164	147749	15	25	32	SITE4707	CLUST795		chrXIII	504895	505008	+	tL(CAA)M	-16	na
chrXIII	504882	504883	+	0	6450	0	0	1	0	SITE4712	CLUST795		chrXIII	504895	505008	+	tL(CAA)M	-13	na
chrXIII	504882	504883	-	37064	112777	115778	22	35	31	SITE4713	CLUST795		chrXIII	504895	505008	+	tL(CAA)M	-13	na
chrXIII	504884	504885	-	0	0	3627	0	0	1	SITE4716	CLUST795		chrXIII	504895	505008	+	tL(CAA)M	-11	na
chrXIII	572965	572966	+	946	0	0	2	0	0	SITE4732	CLUST801		chrXIII	572883	572955	-	tM(CAU)M	-10	na
chrXIII	572966	572967	+	23631	16379	33523	7	8	6	SITE4733	CLUST801		chrXIII	572883	572955	-	tM(CAU)M	-11	na
chrXIII	572967	572968	+	105616	87928	96234	20	28	27	SITE4734	CLUST801		chrXIII	572883	572955	-	tM(CAU)M	-12	na
chrXIII	572966	572967	-	0	0	139	0	0	1	SITE4735	CLUST801		chrXIII	572883	572955	-	tM(CAU)M	-12	na
chrXIII	572968	572969	+	599	2452	4768	2	1	3	SITE4736	CLUST801		chrXIII	572883	572955	-	tM(CAU)M	-13	na
chrXIII	572967	572968	-	0	0	4154	0	0	1	SITE4737	CLUST801		chrXIII	572883	572955	-	tM(CAU)M	-13	na
chrXIII	572968	572969	-	0	17399	6292	0	3	1	SITE4738	CLUST801		chrXIII	572883	572955	-	tM(CAU)M	-14	na
chrXIII	572969	572970	-	29396	21732	44501	4	4	4	SITE4740	CLUST801		chrXIII	572883	572955	-	tM(CAU)M	-15	na
chrXIII	572970	572971	-	98126	41672	36247	18	11	13	SITE4741	CLUST801		chrXIII	572883	572955	-	tM(CAU)M	-16	na
chrXIII	572971	572972	-	18624	975	39951	1	1	3	SITE4742	CLUST801		chrXIII	572883	572955	-	tM(CAU)M	-17	na
chrXIII	586715	586716	+	111	0	0	1	0	0	SITE4748	CLUST802		chrXIII	586636	586709	-	tV(AAC)M3	-6	na
chrXIII	586717	586718	-	0	1489	0	0	1	0	SITE4749	CLUST802		chrXIII	586636	586709	-	tV(AAC)M3	-9	na
chrXIII	586719	586720	+	6595	0	0	1	0	0	SITE4750	CLUST802		chrXIII	586636	586709	-	tV(AAC)M3	-10	na
chrXIII	586720	586721	+	0	782	1891	0	1	3	SITE4751	CLUST802		chrXIII	586636	586709	-	tV(AAC)M3	-11	na
chrXIII	586721	586722	+	11534	11183	7890	2	3	3	SITE4752	CLUST802		chrXIII	586636	586709	-	tV(AAC)M3	-12	na
chrXIII	586722	586723	+	0	0	267	0	0	1	SITE4753	CLUST802		chrXIII	586636	586709	-	tV(AAC)M3	-13	na
chrXIII	586723	586724	+	0	3442	3401	0	2	1	SITE4754	CLUST802		chrXIII	586636	586709	-	tV(AAC)M3	-14	na
chrXIII	586723	586724	-	0	11699	812	0	2	2	SITE4756	CLUST802		chrXIII	586636	586709	-	tV(AAC)M3	-15	na
chrXIII	586724	586725	-	48074	11530	11337	7	3	4	SITE4757	CLUST802		chrXIII	586636	586709	-	tV(AAC)M3	-16	na
chrXIII	586725	586726	-	7289	2939	10741	1	2	1	SITE4758	CLUST802		chrXIII	586636	586709	-	tV(AAC)M3	-17	na
chrXIII	586726	586727	-	221	1527	7435	1	2	1	SITE4759	CLUST802		chrXIII	586636	586709	-	tV(AAC)M3	-18	na
chrXIII	586727	586728	-	0	4476	0	0	1	0	SITE4760	CLUST802		chrXIII	586636	586709	-	tV(AAC)M3	-19	na
chrXIII	586733	586734	+	0	0	1737	0	0	2	SITE4761	CLUST802		chrXIII	586636	586709	-	tV(AAC)M3	-24	na
chrXIII	654904	654905	-	0	0	1613	0	0	1	SITE4771	CLUST808		chrXIII	655076	658342	+	YMR196W	-172	na
chrXIII	667406	667407	-	0	92	0	0	1	0	SITE4775	CLUST809		chrXIII	667287	667455	-	RNA170	0	48
chrXIII	747969	747970	+	0	0	2186	0	0	1	SITE4794	CLUST816		chrXIII	747892	747963	-	tR(UCU)M1	-6	na
chrXIII	747971	747972	+	381	2021	0	1	1	0	SITE4795	CLUST816		chrXIII	747892	747963	-	tR(UCU)M1	-8	na
chrXIII	747973	747974	+	21332	8248	8529	2	4	4	SITE4796	CLUST816		chrXIII	747892	747963	-	tR(UCU)M1	-10	na
chrXIII	747974	747975	+	9265	5915	803	3	1	1	SITE4797	CLUST816		chrXIII	747892	747963	-	tR(UCU)M1	-11	na
chrXIII	747975	747976	+	7220	918	17090	3	1	6	SITE4798	CLUST816		chrXIII	747892	747963	-	tR(UCU)M1	-12	na
chrXIII	747974	747975	-	21615	1182	9407	1	1	2	SITE4799	CLUST816		chrXIII	747892	747963	-	tR(UCU)M1	-12	na
chrXIII	747976	747977	+	0	4002	0	0	1	0	SITE4800	CLUST816		chrXIII	747892	747963	-	tR(UCU)M1	-13	na
chrXIII	747976	747977	-	380	53053	19356	2	9	6	SITE4801	CLUST816		chrXIII	747892	747963	-	tR(UCU)M1	-14	na
chrXIII	747977	747978	-	3950	4649	8696	1	2	3	SITE4802	CLUST816		chrXIII	747892	747963	-	tR(UCU)M1	-15	na
chrXIII	747978	747979	-	0	3679	10839	0	2	2	SITE4804	CLUST816		chrXIII	747892	747963	-	tR(UCU)M1	-16	na
chrXIII	747980	747981	-	5062	0	0	1	0	0	SITE4806	CLUST816		chrXIII	747892	747963	-	tR(UCU)M1	-18	na
chrXIII	747987	747988	-	0	0	1284	0	0	1	SITE4808	CLUST816		chrXIII	747892	747963	-	tR(UCU)M1	-25	na
chrXIII	768452	768453	+	699	4948	0	3	2	0	SITE4813	CLUST818		chrXIII	768369	768441	-	tA(AGC)M2	-11	na
chrXIII	768453	768454	+	31157	47960	26087	12	20	16	SITE4815	CLUST818		chrXIII	768369	768441	-	tA(AGC)M2	-12	na
chrXIII	768455	768456	-	149	695	0	1	1	0	SITE4820	CLUST818		chrXIII	768369	768441	-	tA(AGC)M2	-15	na
chrXIII	768456	768457	-	31843	63221	47636	8	16	14	SITE4821	CLUST818		chrXIII	768369	768441	-	tA(AGC)M2	-16	na
chrXIII	768457	768458	-	0	6520	0	0	1	0	SITE4822	CLUST818		chrXIII	768369	768441	-	tA(AGC)M2	-17	na
chrXIII	768465	768466	-	0	0	6021	0	0	1	SITE4824	CLUST818		chrXIII	768369	768441	-	tA(AGC)M2	-25	na
chrXIII	808331	808332	+	155063	97174	200737	44	44	54	SITE4828	CLUST819		chrXIII	808246	808317	-	tQ(CUG)M	-14	na
chrXIII	808334	808335	-	173617	195647	277029	62	71	83	SITE4836	CLUST819		chrXIII	808246	808317	-	tQ(CUG)M	-18	na
chrXIII	808336	808337	+	12200	0	0	1	0	0	SITE4837	CLUST819		chrXIII	808246	808317	-	tQ(CUG)M	-19	na
chrXIII	826731	826732	-	0	0	789	0	0	1	SITE4844	CLUST821		chrXIII	827028	831329	-	YMR280C	4597	na
chrXIII	837910	837911	+	270	1271	0	1	1	0	SITE4849	CLUST825		chrXIII	837928	838016	+	tY(GUA)M2	-18	na
chrXIII	837911	837912	+	5095	13159	2698	2	4	2	SITE4850	CLUST825		chrXIII	837928	838016	+	tY(GUA)M2	-17	na
chrXIII	837912	837913	+	169064	126982	117865	25	36	37	SITE4851	CLUST825		chrXIII	837928	838016	+	tY(GUA)M2	-16	na
chrXIII	837913	837914	+	9912	25375	32621	3	4	4	SITE4852	CLUST825		chrXIII	837928	838016	+	tY(GUA)M2	-15	na
chrXIII	837913	837914	-	0	1191	0	0	1	0	SITE4854	CLUST825		chrXIII	837928	838016	+	tY(GUA)M2	-15	na
chrXIII	837914	837915	-	554	19182	24026	3	3	6	SITE4855	CLUST825		chrXIII	837928	838016	+	tY(GUA)M2	-14	na
chrXIII	837915	837916	-	122675	113070	150584	23	31	26	SITE4856	CLUST825		chrXIII	837928	838016	+	tY(GUA)M2	-13	na
chrXIII	837916	837917	-	8111	24442	28556	2	8	4	SITE4857	CLUST825		chrXIII	837928	838016	+	tY(GUA)M2	-12	na
chrXIII	837924	837925	-	799	0	0	1	0	0	SITE4861	CLUST825		chrXIII	837928	838016	+	tY(GUA)M2	-4	na
chrXIII	865456	865457	+	0	256	0	0	1	0	SITE4866	CLUST828		chrXIII	865559	867091	-	YMR300C	1635	na
chrXIV	38702	38703	-	316	0	0	1	0	0	SITE4884	CLUST834		chrXIV	38642	39082	+	YNL319W	0	61
chrXIV	96320	96321	+	0	221	0	0	1	0	SITE4892	CLUST837		chrXIV	96173	96544	+	YNL285W	0	147
chrXIV	96321	96322	+	32789	29122	16879	5	5	3	SITE4893	CLUST837		chrXIV	96173	96544	+	YNL285W	0	148
chrXIV	96322	96323	+	0	3578	11892	0	2	3	SITE4894	CLUST837		chrXIV	96173	96544	+	YNL285W	0	149
chrXIV	96322	96323	-	0	3630	0	0	1	0	SITE4895	CLUST837		chrXIV	96173	96544	+	YNL285W	0	150
chrXIV	96323	96324	+	0	4809	0	0	1	0	SITE4896	CLUST837		chrXIV	96173	96544	+	YNL285W	0	150
chrXIV	96324	96325	+	102265	97571	158131	17	31	31	SITE4897	CLUST837		chrXIV	96173	96544	+	YNL285W	0	151
chrXIV	96323	96324	-	0	619	0	0	1	0	SITE4898	CLUST837		chrXIV	96173	96544	+	YNL285W	0	151
chrXIV	96324	96325	-	27773	26155	18130	8	3	6	SITE4899	CLUST837		chrXIV	96173	96544	+	YNL285W	0	152
chrXIV	96325	96326	+	19373	3006	19148	4	5	4	SITE4900	CLUST837		chrXIV	96173	96544	+	YNL285W	0	152
chrXIV	96325	96326	-	27354	2059	25853	3	2	3	SITE4901	CLUST837		chrXIV	96173	96544	+	YNL285W	0	153
chrXIV	96326	96327	-	130	0	20081	1	0	2	SITE4903	CLUST837		chrXIV	96173	96544	+	YNL285W	0	154
chrXIV	96327	96328	+	31265	0	1891	2	0	1	SITE4904	CLUST837		chrXIV	96173	96544	+	YNL285W	0	154
chrXIV	96327	96328	-	80836	98921	152533	10	26	20	SITE4906	CLUST837		chrXIV	96173	96544	+	YNL285W	0	155
chrXIV	96328	96329	-	13842	19024	21419	2	5	4	SITE4907	CLUST837		chrXIV	96173	96544	+	YNL285W	0	156
chrXIV	96330	96331	-	1758	26885	9735	2	7	1	SITE4909	CLUST837		chrXIV	96173	96544	+	YNL285W	0	158
chrXIV	96332	96333	-	0	132	0	0	1	0	SITE4910	CLUST837		chrXIV	96173	96544	+	YNL285W	0	160
chrXIV	102698	102699	+	19945	5847	22578	4	9	11	SITE4913	CLUST838		chrXIV	102716	102789	+	tN(GUU)N1	-18	na
chrXIV	102699	102700	+	193	0	0	1	0	0	SITE4914	CLUST838		chrXIV	102716	102789	+	tN(GUU)N1	-17	na
chrXIV	102700	102701	+	8497	5208	12959	5	3	5	SITE4915	CLUST838		chrXIV	102716	102789	+	tN(GUU)N1	-16	na
chrXIV	102701	102702	+	2379	0	759	1	0	1	SITE4916	CLUST838		chrXIV	102716	102789	+	tN(GUU)N1	-15	na
chrXIV	102702	102703	+	0	2739	0	0	1	0	SITE4918	CLUST838		chrXIV	102716	102789	+	tN(GUU)N1	-14	na
chrXIV	102701	102702	-	45444	26354	65181	11	8	11	SITE4919	CLUST838		chrXIV	102716	102789	+	tN(GUU)N1	-15	na
chrXIV	102702	102703	-	2045	6142	1820	1	3	2	SITE4920	CLUST838		chrXIV	102716	102789	+	tN(GUU)N1	-14	na
chrXIV	102703	102704	-	108149	11808	81073	12	8	10	SITE4921	CLUST838		chrXIV	102716	102789	+	tN(GUU)N1	-13	na
chrXIV	102704	102705	-	16005	0	0	2	0	0	SITE4922	CLUST838		chrXIV	102716	102789	+	tN(GUU)N1	-12	na
chrXIV	102705	102706	-	6947	11636	272	1	3	1	SITE4923	CLUST838		chrXIV	102716	102789	+	tN(GUU)N1	-11	na
chrXIV	104790	104791	+	209	0	0	1	0	0	SITE4931	CLUST839		chrXIV	104805	104877	+	tT(AGU)N1	-15	na
chrXIV	104791	104792	+	66515	78170	90937	13	21	18	SITE4932	CLUST839		chrXIV	104805	104877	+	tT(AGU)N1	-14	na
chrXIV	104793	104794	-	12195	51	0	1	1	0	SITE4936	CLUST839		chrXIV	104805	104877	+	tT(AGU)N1	-12	na
chrXIV	104794	104795	-	94913	73429	153550	15	23	30	SITE4937	CLUST839		chrXIV	104805	104877	+	tT(AGU)N1	-11	na
chrXIV	104802	104803	-	0	0	12495	0	0	1	SITE4940	CLUST839		chrXIV	104805	104877	+	tT(AGU)N1	-3	na
chrXIV	146733	146734	-	0	6300	0	0	1	0	SITE4944	CLUST842		chrXIV	145563	146615	-	YNL264C	-119	na
chrXIV	374850	374851	+	570	0	72	1	0	1	SITE4968	CLUST851		chrXIV	374869	374959	+	tF(GAA)N	-19	na
chrXIV	374852	374853	+	6574	2394	3318	1	2	4	SITE4969	CLUST851		chrXIV	374869	374959	+	tF(GAA)N	-17	na
chrXIV	374853	374854	+	26581	16281	28587	7	7	11	SITE4970	CLUST851		chrXIV	374869	374959	+	tF(GAA)N	-16	na
chrXIV	374853	374854	-	161	5898	1550	1	2	1	SITE4972	CLUST851		chrXIV	374869	374959	+	tF(GAA)N	-16	na
chrXIV	374854	374855	+	1491	11986	45164	3	6	6	SITE4973	CLUST851		chrXIV	374869	374959	+	tF(GAA)N	-15	na
chrXIV	374854	374855	-	0	2821	76	0	1	1	SITE4974	CLUST851		chrXIV	374869	374959	+	tF(GAA)N	-15	na
chrXIV	374855	374856	-	175	0	12756	1	0	3	SITE4976	CLUST851		chrXIV	374869	374959	+	tF(GAA)N	-14	na
chrXIV	374856	374857	+	0	0	153	0	0	1	SITE4977	CLUST851		chrXIV	374869	374959	+	tF(GAA)N	-13	na
chrXIV	374856	374857	-	15461	7148	11853	5	6	6	SITE4978	CLUST851		chrXIV	374869	374959	+	tF(GAA)N	-13	na
chrXIV	374857	374858	-	56460	28287	67902	10	8	11	SITE4979	CLUST851		chrXIV	374869	374959	+	tF(GAA)N	-12	na
chrXIV	374859	374860	-	0	0	13766	0	0	1	SITE4981	CLUST851		chrXIV	374869	374959	+	tF(GAA)N	-10	na
chrXIV	374861	374862	-	0	1303	70	0	1	1	SITE4982	CLUST851		chrXIV	374869	374959	+	tF(GAA)N	-8	na
chrXIV	442989	442990	+	34746	15810	6974	5	6	3	SITE4991	CLUST857		chrXIV	443006	443119	+	tL(CAA)N	-17	na
chrXIV	442990	442991	+	27325	372	14332	2	1	3	SITE4992	CLUST857		chrXIV	443006	443119	+	tL(CAA)N	-16	na
chrXIV	442991	442992	+	0	0	2497	0	0	2	SITE4993	CLUST857		chrXIV	443006	443119	+	tL(CAA)N	-15	na
chrXIV	442992	442993	-	17475	33776	32877	2	7	6	SITE4996	CLUST857		chrXIV	443006	443119	+	tL(CAA)N	-14	na
chrXIV	442993	442994	-	3853	13944	57176	3	6	8	SITE4998	CLUST857		chrXIV	443006	443119	+	tL(CAA)N	-13	na
chrXIV	465710	465711	+	0	0	5463	0	0	1	SITE5001	CLUST858		chrXIV	462411	465947	+	YNL087W	0	3299
chrXIV	518937	518938	+	751	1016	0	1	1	0	SITE5009	CLUST862		chrXIV	517994	518845	-	YNL055C	-92	na
chrXIV	519175	519176	-	9759	0	0	1	0	0	SITE5011	CLUST863		chrXIV	519099	519169	-	tD(GUC)N	-7	na
chrXIV	519186	519187	-	0	0	8103	0	0	1	SITE5012	CLUST863		chrXIV	519099	519169	-	tD(GUC)N	-18	na
chrXIV	547076	547077	+	3960	873	33954	2	2	4	SITE5025	CLUST865		chrXIV	547094	547196	+	tP(UGG)N1	-18	na
chrXIV	547077	547078	+	477	7582	0	1	3	0	SITE5026	CLUST865		chrXIV	547094	547196	+	tP(UGG)N1	-17	na
chrXIV	547078	547079	+	73592	65545	69129	5	14	12	SITE5027	CLUST865		chrXIV	547094	547196	+	tP(UGG)N1	-16	na
chrXIV	547079	547080	+	0	4627	782	0	1	1	SITE5028	CLUST865		chrXIV	547094	547196	+	tP(UGG)N1	-15	na
chrXIV	560775	560776	+	0	874	5195	0	1	1	SITE5031	CLUST866		chrXIV	560693	560765	-	tT(AGU)N2	-10	na
chrXIV	560776	560777	-	0	2373	0	0	1	0	SITE5034	CLUST866		chrXIV	560693	560765	-	tT(AGU)N2	-12	na
chrXIV	560777	560778	+	188027	99638	216931	31	38	36	SITE5035	CLUST866		chrXIV	560693	560765	-	tT(AGU)N2	-12	na
chrXIV	560778	560779	-	0	0	8143	0	0	1	SITE5037	CLUST866		chrXIV	560693	560765	-	tT(AGU)N2	-14	na
chrXIV	560780	560781	-	127153	99670	150064	16	30	29	SITE5040	CLUST866		chrXIV	560693	560765	-	tT(AGU)N2	-16	na
chrXIV	560781	560782	-	901	0	0	1	0	0	SITE5041	CLUST866		chrXIV	560693	560765	-	tT(AGU)N2	-17	na
chrXIV	560785	560786	-	1483	0	0	1	0	0	SITE5042	CLUST866		chrXIV	560693	560765	-	tT(AGU)N2	-21	na
chrXIV	568098	568099	+	27145	19868	39652	5	9	7	SITE5045	CLUST867		chrXIV	568115	568217	+	tP(UGG)N2	-17	na
chrXIV	568099	568100	+	17235	21054	10002	3	3	3	SITE5046	CLUST867		chrXIV	568115	568217	+	tP(UGG)N2	-16	na
chrXIV	568101	568102	-	25363	28491	74635	9	11	17	SITE5049	CLUST867		chrXIV	568115	568217	+	tP(UGG)N2	-14	na
chrXIV	568102	568103	-	579	2718	1191	2	1	1	SITE5050	CLUST867		chrXIV	568115	568217	+	tP(UGG)N2	-13	na
chrXIV	569949	569950	+	0	7562	0	0	1	0	SITE5055	CLUST869		chrXIV	569867	569940	-	tI(AAU)N1	-9	na
chrXIV	569951	569952	+	19313	31355	66231	4	9	10	SITE5057	CLUST869		chrXIV	569867	569940	-	tI(AAU)N1	-11	na
chrXIV	569952	569953	+	71142	1626	13089	4	1	3	SITE5058	CLUST869		chrXIV	569867	569940	-	tI(AAU)N1	-12	na
chrXIV	569953	569954	-	0	2259	4861	0	1	1	SITE5061	CLUST869		chrXIV	569867	569940	-	tI(AAU)N1	-14	na
chrXIV	569954	569955	-	473	18301	13515	2	3	5	SITE5062	CLUST869		chrXIV	569867	569940	-	tI(AAU)N1	-15	na
chrXIV	569955	569956	-	0	19993	760	0	6	1	SITE5064	CLUST869		chrXIV	569867	569940	-	tI(AAU)N1	-16	na
chrXIV	569956	569957	-	0	0	2807	0	0	1	SITE5065	CLUST869		chrXIV	569867	569940	-	tI(AAU)N1	-17	na
chrXIV	602296	602297	+	2458	3442	4695	2	1	1	SITE5069	CLUST870		chrXIV	602138	602476	-	YNL017C	0	180
chrXIV	602297	602298	+	39177	14078	28655	8	4	5	SITE5070	CLUST870		chrXIV	602138	602476	-	YNL017C	0	179
chrXIV	602298	602299	+	3044	0	0	3	0	0	SITE5071	CLUST870		chrXIV	602138	602476	-	YNL017C	0	178
chrXIV	602298	602299	-	0	0	1301	0	0	1	SITE5073	CLUST870		chrXIV	602138	602476	-	YNL017C	0	177
chrXIV	602299	602300	+	0	4916	18397	0	1	1	SITE5074	CLUST870		chrXIV	602138	602476	-	YNL017C	0	177
chrXIV	602299	602300	-	18143	7591	0	2	2	0	SITE5075	CLUST870		chrXIV	602138	602476	-	YNL017C	0	176
chrXIV	602300	602301	-	32832	23789	32402	3	9	8	SITE5077	CLUST870		chrXIV	602138	602476	-	YNL017C	0	175
[truncated: 398 more rows]

## Sheet: Table S4
Supplemental Table S4. Cluster summary with hot/cold phenotypes and Rpc34, Brf1, and IN binding
Cluster	Upstream	Chrom	Strand	Start Pos	Stop Pos	MeanTags	Fold Change from Mean	Chi Squ	Poisson	Phenotype	Brf1_FE_100bp(position -75to25 relativeto tDNA)	RPC34_FE_100bp(position -50to50 relativeto tDNA)	Integrase_FE_100bp(position -84to16 relativeto tDNA)
CLUST819	tQ(CUG)M	chrXIII	-	808246	808317	112.457	3.19096	4.70004e-38	1.34984e-25	Hot	36.5887	35.2041	8.66268	1
CLUST133	tV(UAC)D	chrIV	-	488797	488870	89.5953	2.54225	1.3101e-19	6.12011e-15	Hot	37.116	35.5829	7.90509	1
CLUST608	tT(CGU)K	chrXI	-	46735	46806	84.6308	2.40139	1.93063e-16	6.07839e-13	Hot	35.8463	37.5872	6.65122	1
CLUST379	tL(GAG)G	chrVII	+	700675	700756	81.8191	2.3216	8.87617e-15	8.33282e-12	Hot	40.6692	38.3859	9.94061	1
CLUST454	tG(GCC)G2	chrVII	-	930953	931023	81.0357	2.29938	2.47991e-14	8.33282e-12	Hot	42.9418	39.8542	11.6314	1
CLUST041	tV(UAC)B	chrII	-	326792	326865	80.1338	2.27378	7.92584e-14	1.94635e-11	Hot	37.0086	36.9208	9.33362	1
CLUST009	tA(UGC)A	chrI	+	166267	166339	79.2751	2.24942	2.34624e-13	4.49009e-11	Hot	47.3835	39.8348	9.2277	1
CLUST198	tG(CCC)D	chrIV	-	1257008	1257079	78.1321	2.21699	9.63793e-13	1.02288e-10	Hot	36.6906	34.7827	6.16896	1
CLUST1022	tS(UGA)P	chrXVI	+	689565	689646	75.4825	2.1418	2.21825e-11	1.11958e-09	Hot	34.3161	35.3506	7.50476	1
CLUST600	tL(UAG)J	chrX	+	617919	618019	73.732	2.09214	1.58362e-10	5.16699e-09	Hot	37.1518	40.2783	6.6411	1
CLUST725	tE(UUC)L	chrXII	+	797178	797249	73.3963	2.08261	2.28652e-10	5.16699e-09	Hot	35.0009	37.1071	5.60889	1
CLUST825	tY(GUA)M2	chrXIII	+	837928	838016	70.287	1.99438	5.92377e-09	4.62363e-08	Hot	38.6049	38.7908	5.60625	1
CLUST655	tK(UUU)K	chrXI	+	578965	579060	70.2206	1.9925	6.3322e-09	4.62363e-08	Hot	37.0103	38.9025	8.59422	1
CLUST528	tS(UGA)I	chrIX	+	248850	248931	69.1082	1.96094	1.89805e-08	9.33309e-08	Hot	34.4145	33.5743	6.67787	1
CLUST011	tS(AGA)A	chrI	-	182522	182603	69.0663	1.95975	1.9769e-08	9.33309e-08	Hot	39.7528	39.1536	6.86067	1
CLUST609	tN(GUU)K	chrXI	+	74624	74697	68.8327	1.95312	2.478e-08	1.85703e-07	Hot	40.0999	38.2468	8.26104	1
CLUST873	tP(AGG)N	chrXIV	-	631846	631917	68.5839	1.94606	3.14716e-08	1.85703e-07	Hot	35.5984	31.4953	5.95075	1
CLUST837	tG(UCC)N	chrXIV	-	96241	96312	68.4779	1.94305	3.48283e-08	1.85703e-07	Hot	38.0303	38.2686	6.60673	1
CLUST738	tL(UAA)L	chrXII	-	962972	963055	68.1961	1.93505	4.55261e-08	1.85703e-07	Hot	38.857	34.6339	6.0648	1
CLUST477	tQ(UUG)H	chrVIII	+	134321	134392	67.4703	1.91446	8.9853e-08	3.64143e-07	Hot	26.3267	28.2518	5.43297	1
CLUST319	tV(AAC)G3	chrVII	-	73829	73902	66.7839	1.89498	1.68651e-07	7.03542e-07	Hot	38.4309	33.6466	8.70067	1
CLUST183	tF(GAA)D	chrIV	-	1095370	1095461	64.0434	1.81722	1.83325e-06	2.50978e-06	Hot	34.6618	37.0807	4.43007	1
CLUST643	tR(ACG)K	chrXI	+	490968	491040	63.6022	1.8047	2.64105e-06	4.6319e-06	Hot	35.6193	32.9816	5.23984	1
CLUST489	tP(UGG)H	chrVIII	-	388893	388995	63.089	1.79014	4.01119e-06	4.6319e-06	Hot	40.5773	42.9979	9.64143	1
CLUST923	tK(UUU)O	chrXV	+	438643	438738	61.9399	1.75754	9.96475e-06	1.50446e-05	Hot	33.6183	33.5712	5.78856	1
CLUST227	tM(CAU)E	chrV	+	100133	100204	61.515	1.74548	1.38255e-05	1.50446e-05	Hot	36.8553	35.3895	5.89706	1
CLUST031	tI(AAU)B	chrII	+	197494	197567	61.478	1.74443	1.4222e-05	1.50446e-05	Hot	40.7119	37.3727	8.78356	1
CLUST180	tV(CAC)D	chrIV	-	1075472	1075544	59.48	1.68774	6.19988e-05	4.57877e-05	Hot	37.4925	35.0006	7.44908	1
CLUST964	tM(CAU)O2	chrXV	+	976421	976493	58.6071	1.66297	0.000114057	7.79013e-05	Hot	41.0634	33.7642	4.30592	1
CLUST782	tW(CCA)M	chrXIII	-	379303	379408	57.6159	1.63484	0.00022232	0.000130292	Hot	35.0221	35.2886	4.54866	1
CLUST866	tT(AGU)N2	chrXIV	-	560693	560765	57.556	1.63314	0.000231274	0.000130292	Hot	32.8815	30.6105	7.2549	1
CLUST1029	tT(UGU)P	chrXVI	+	744284	744355	57.4437	1.62996	0.000248978	0.000130292	Hot	39.3039	39.1425	7.40678	1
CLUST728	tR(CCG)L	chrXII	+	818609	818680	57.3007	1.6259	0.000273375	0.000130292	Hot	18.9898	24.3877	2.80226	1
CLUST1042	tG(GCC)P2	chrXVI	+	860379	860449	56.2917	1.59727	0.000520548	0.000214159	Hot	36.0103	34.9959	8.23165	1
CLUST759	tP(UGG)M	chrXIII	-	196068	196170	56.2188	1.5952	0.000544779	0.000214159	Hot	35.9414	36.9826	6.541	1
CLUST474	tT(AGU)H	chrVIII	-	116107	116179	55.8313	1.5842	0.000692127	0.000345834	Hot	31.815	31.8944	6.98042	1
CLUST007	tP(UGG)A	chrI	+	139152	139254	55.4703	1.57396	0.000861949	0.000345834	Hot	35.5183	33.7573	8.42565	1
CLUST545	tT(AGU)J	chrX	-	59100	59172	55.0211	1.56122	0.00112712	0.000345834	Hot	33.177	33.4673	8.12324	1
CLUST432	tG(UCC)G	chrVII	+	779616	779687	54.2685	1.53986	0.0017458	0.000548497	Hot	40.9558	37.3551	7.22108	1
CLUST1031	tK(UUU)P	chrXVI	-	769207	769302	53.735	1.52472	0.00235917	0.000854107	Hot	36.4909	36.9611	6.0924	1
CLUST316	tK(CUU)F	chrVI	-	226688	226760	53.5517	1.51952	0.00261177	0.000854107	Hot	29.3556	29.8872	7.46789	1
CLUST437	tV(AAC)G2	chrVII	+	823482	823555	53.5514	1.51951	0.00261226	0.000854107	Hot	37.2824	33.5903	6.28028	1
CLUST801	tM(CAU)M	chrXIII	-	572883	572955	53.3983	1.51517	0.00284187	0.000854107	Hot	40.6837	39.5263	5.36869	1
CLUST515	tT(AGU)I1	chrIX	+	175031	175103	52.4784	1.48907	0.00465555	0.00130536	Ave	32.5549	32.152	8.12268	1
CLUST104	tG(GCC)D1	chrIV	+	83548	83618	52.3315	1.4849	0.00502708	0.00130536	Ave	33.1913	33.1269	10.1785	1
CLUST910	tS(GCU)O	chrXV	+	274673	274773	51.3313	1.45652	0.0083539	0.0019574	Ave	37.2632	40.4443	11.4334	1
CLUST973	tW(CCA)P	chrXVI	-	56169	56274	50.4462	1.4314	0.0128154	0.00287868	Ave	36.0098	37.8912	6.52606	1
CLUST622	tK(CUU)K	chrXI	+	202999	203071	50.4053	1.43024	0.0130647	0.00287868	Ave	38.3694	39.5753	5.66313	1
CLUST446	tK(CUU)G3	chrVII	+	876394	876466	50.0696	1.42072	0.0152808	0.00287868	Ave	35.26	34.725	5.51043	1
CLUST1033	tC(GCA)P2	chrXVI	-	775765	775836	49.7892	1.41276	0.0173789	0.00415057	Ave	31.9683	31.1125	5.03147	1
CLUST795	tL(CAA)M	chrXIII	+	504895	505008	49.4343	1.40269	0.0203933	0.00415057	Ave	38.3871	42.4794	11.7445	1
CLUST480	tF(GAA)H1	chrVIII	-	237848	237939	48.6638	1.38083	0.0285453	0.00586472	Ave	35.1148	36.6745	5.33857	1
CLUST354	tL(CAA)G2	chrVII	+	423092	423205	47.9262	1.3599	0.0388359	0.00811769	Ave	33.6469	39.3237	9.45111	1
CLUST444	tL(CAA)G3	chrVII	-	857378	857491	47.5768	1.34998	0.044721	0.00811769	Ave	26.3034	28.5665	5.36281	1
CLUST339	tH(GUG)G2	chrVII	+	319781	319852	47.3563	1.34373	0.0488089	0.00811769	Ave	38.3847	42.5415	4.52119	1
CLUST665	tS(AGA)L	chrXII	-	167944	168025	47.1507	1.33789	0.0528985	0.00811769	Ave	39.2738	37.3264	5.68945	1
CLUST310	tS(GCU)F	chrVI	-	191513	191613	47.1125	1.33681	0.0536883	0.00811769	Ave	34.4874	37.3873	9.02808	1
CLUST911	tG(GCC)O2	chrXV	+	282164	282234	46.8496	1.32935	0.0594008	0.0110021	Ave	35.511	34.1945	8.27213	1
CLUST223	tG(GCC)E	chrV	-	61890	61960	46.8394	1.32906	0.0596323	0.0110021	Ave	32.1081	33.124	6.8355	1
CLUST530	tD(GUC)I1	chrIX	-	324303	324374	46.7744	1.32722	0.0611233	0.0110021	Ave	34.8101	36.7913	6.68658	1
CLUST646	tA(AGC)K2	chrXI	+	517988	518060	46.7551	1.32667	0.0615738	0.0110021	Ave	33.0503	30.3884	9.37413	1
CLUST090	tQ(UUG)C	chrIII	-	168301	168372	45.8378	1.30064	0.08627	0.0145941	Ave	31.4979	31.1182	4.28351	1
CLUST252	tA(UGC)E	chrV	-	312023	312095	45.6517	1.29536	0.0921481	0.0145941	Ave	31.5162	32.8192	7.34568	1
CLUST723	tS(GCU)L	chrXII	+	784354	784453	45.6338	1.29485	0.0927322	0.0145941	Ave	29.3887	30.4315	8.31764	1
CLUST1019	tF(GAA)P2	chrXVI	-	622540	622631	45.0558	1.27845	0.113158	0.0145941	Ave	35.986	36.7249	7.94238	1
CLUST792	tK(CUU)M	chrXIII	-	480621	480693	45.0382	1.27795	0.113833	0.0145941	Ave	31.4505	33.3578	6.77698	1
CLUST295	tP(UGG)F	chrVI	+	101376	101478	44.6438	1.26676	0.129773	0.0189379	Ave	39.14	37.071	4.89746	1
CLUST700	tL(UAG)L1	chrXII	-	592519	592619	44.0531	1.25	0.156815	0.0189379	Ave	33.0419	35.3642	5.79756	1
CLUST380	tK(UUU)G2	chrVII	-	700953	701048	43.1547	1.22451	0.205843	0.0240287	Ave	39.7177	40.2793	5.28056	1
CLUST067	tC(GCA)B	chrII	-	643007	643078	42.9559	1.21887	0.218057	0.0297949	Ave	34.622	34.8447	6.8909	1
CLUST758	tG(GCC)M	chrXIII	-	183898	183968	42.841	1.21561	0.225345	0.0297949	Ave	39.1056	37.3293	7.02409	1
CLUST177	tE(CUC)D	chrIV	-	1017207	1017278	42.6256	1.20949	0.239485	0.0297949	Ave	36.2712	36.4089	7.35045	1
CLUST448	tW(CCA)G2	chrVII	-	878710	878815	42.6114	1.20909	0.24044	0.0297949	Ave	37.1146	34.6425	5.98656	1
CLUST138	tL(UAA)D	chrIV	+	519743	519826	42.4675	1.20501	0.250249	0.0297949	Ave	35.3906	38.2662	6.82811	1
CLUST232	tQ(UUG)E2	chrV	-	131082	131153	42.2235	1.19809	0.267519	0.0297949	Ave	26.421	24.9166	6.35331	1
CLUST676	tR(ACG)L	chrXII	+	374355	374427	42.1548	1.19614	0.272526	0.0297949	Ave	28.7127	30.1043	3.70808	1
CLUST948	tM(CAU)O1	chrXV	+	710201	710272	42.0601	1.19345	0.279538	0.0297949	Ave	36.8403	35.5362	8.31324	1
CLUST881	tL(UAA)N	chrXIV	-	726134	726217	41.5935	1.18021	0.315833	0.0360857	Ave	41.1875	40.2477	4.6468	1
CLUST893	tG(UCC)O	chrXV	-	110962	111033	41.48	1.17699	0.325435	0.0360857	Ave	41.7581	41.1512	8.01214	1
CLUST594	tR(CCU)J	chrX	+	538555	538626	41.3101	1.17217	0.339334	0.0360857	Ave	35.9552	35.3193	7.49579	1
CLUST324	tK(CUU)G1	chrVII	+	122269	122341	41.1838	1.16859	0.350151	0.0360857	Ave	30.9366	31.2356	7.54049	1
CLUST275	tV(AAC)E2	chrV	+	469457	469530	41.1698	1.16819	0.351372	0.0360857	Ave	35.7032	35.7951	5.38879	1
CLUST1011	tG(GCC)P1	chrXVI	+	572269	572339	41.0777	1.16557	0.359416	0.0360857	Ave	37.0781	37.0199	7.94336	1
CLUST086	tN(GUU)C	chrIII	+	127716	127789	40.9823	1.16287	0.367867	0.0426641	Ave	29.377	30.8085	5.10231	1
CLUST774	tA(AGC)M1	chrXIII	-	321147	321219	40.6863	1.15447	0.394885	0.0426641	Ave	40.604	36.4583	7.12784	1
CLUST536	tE(UUC)I	chrIX	+	370417	370488	40.5165	1.14965	0.41091	0.0426641	Ave	35.759	35.8898	6.83497	1
CLUST1038	tI(AAU)P1	chrXVI	+	819529	819602	40.431	1.14722	0.419122	0.0426641	Ave	37.5005	37.5434	7.45803	1
CLUST476	tS(AGA)H	chrVIII	-	133026	133107	40.4081	1.14657	0.421338	0.0426641	Ave	36.0693	36.4829	8.0989	1
CLUST907	tN(GUU)O1	chrXV	+	228331	228404	40.3738	1.1456	0.424668	0.0426641	Ave	33.8477	32.4769	5.28144	1
CLUST913	tY(GUA)O	chrXV	+	288192	288280	40.1911	1.14042	0.442675	0.0426641	Ave	27.3308	28.082	6.33415	1
CLUST038	tT(AGU)B	chrII	+	266378	266450	39.9873	1.13463	0.463274	0.0492116	Ave	28.1154	27.7448	6.85323	1
CLUST087	tG(GCC)C	chrIII	-	142701	142771	39.8787	1.13155	0.474461	0.0492116	Ave	37.5223	37.9486	7.74303	1
CLUST591	tS(AGA)J	chrX	-	524012	524093	39.8722	1.13137	0.475131	0.0492116	Ave	39.8963	37.5653	9.83579	1
CLUST559	tR(ACG)J	chrX	+	233939	234011	39.8378	1.13039	0.478709	0.0492116	Ave	39.5158	35.5863	7.66714	1
CLUST616	tR(UCU)K	chrXI	-	162487	162558	39.5457	1.1221	0.509672	0.0492116	Ave	30.7994	31.9507	6.71316	1
CLUST017	tF(GAA)B	chrII	+	36398	36488	39.4078	1.11819	0.524641	0.0492116	Ave	38.5075	35.1352	5.37029	1
CLUST241	tH(GUG)E1	chrV	+	207357	207428	39.1374	1.11052	0.55464	0.0492116	Ave	39.2541	36.7304	5.1937	1
CLUST593	tG(GCC)J2	chrX	+	531828	531898	39.1297	1.1103	0.555499	0.0492116	Ave	33.5721	31.7895	8.90428	1
CLUST377	tT(UGU)G1	chrVII	+	661749	661820	38.8146	1.10136	0.591515	0.0553446	Ave	36.0494	35.0658	5.12598	1
CLUST999	tC(GCA)P1	chrXVI	-	435893	435964	38.7711	1.10012	0.596562	0.0553446	Ave	40.276	34.6916	7.19194	1
CLUST779	tF(GAA)M	chrXIII	+	352280	352370	38.5431	1.09365	0.62337	0.0553446	Ave	32.4645	32.1032	6.87463	1
CLUST926	tP(UGG)O2	chrXV	+	464450	464551	38.5353	1.09343	0.624292	0.0553446	Ave	36.073	36.9877	7.00763	1
CLUST789	tV(AAC)M2	chrXIII	-	420588	420661	38.4217	1.09021	0.637855	0.0553446	Ave	32.418	31.1759	6.55514	1
CLUST498	tV(CAC)H	chrVIII	-	475706	475778	38.3693	1.08872	0.644147	0.0553446	Ave	32.4672	35.8479	5.06849	1
CLUST929	tN(GUU)O2	chrXV	+	487439	487512	38.3568	1.08837	0.645644	0.0553446	Ave	30.9512	34.109	5.47779	1
CLUST960	tA(UGC)O	chrXV	-	854187	854259	38.2671	1.08582	0.656491	0.0553446	Ave	38.3788	40.5931	6.0536	1
CLUST043	tL(UAA)B2	chrII	+	347603	347686	38.192	1.08369	0.665632	0.0553446	Ave	37.9352	36.1514	7.84757	1
CLUST557	tD(GUC)J1	chrX	+	204735	204806	38.0378	1.07932	0.684543	0.0553446	Ave	27.7538	28.5634	7.02471	1
CLUST839	tT(AGU)N1	chrXIV	+	104805	104877	38.0313	1.07913	0.685339	0.0553446	Ave	33.1856	32.652	6.74046	1
CLUST303	tG(GCC)F1	chrVI	+	162228	162298	38.0096	1.07852	0.68802	0.0553446	Ave	37.6327	37.5791	7.68526	1
CLUST740	tN(GUU)L	chrXII	-	975983	976056	37.7457	1.07103	0.720912	0.0606461	Ave	29.8474	30.8998	5.82873	1
CLUST915	tP(UGG)O1	chrXV	+	301097	301198	37.1612	1.05444	0.795517	0.0606461	Ave	38.6919	37.2891	9.40823	1
CLUST1010	tF(GAA)P1	chrXVI	-	560198	560289	36.9097	1.04731	0.828258	0.0647067	Ave	35.66	36.2471	5.87402	1
CLUST225	tS(AGA)E	chrV	+	86604	86685	36.8269	1.04496	0.839102	0.0647067	Ave	33.1443	31.5094	8.03143	1
CLUST353	tV(AAC)G1	chrVII	-	412294	412367	36.5107	1.03599	0.880789	0.0647067	Ave	33.3024	34.4042	5.90483	1
CLUST724	tD(GUC)L2	chrXII	+	793918	793989	36.392	1.03262	0.896533	0.0647067	Ave	37.6728	38.2484	7.1946	1
CLUST838	tN(GUU)N1	chrXIV	+	102716	102789	36.1918	1.02694	0.92317	0.0647067	Ave	35.8109	34.3559	5.56891	1
CLUST233	tK(CUU)E1	chrV	-	135425	135497	36.1406	1.02548	0.929998	0.0647067	Ave	38.4507	38.6495	6.22373	1
CLUST566	tY(GUA)J1	chrX	+	354244	354332	36.11	1.02462	0.934072	0.0647067	Ave	30.8384	33.9587	4.13117	1
CLUST946	tV(AAC)O	chrXV	-	663812	663885	35.5283	1.00811	0.988104	0.0671731	Ave	35.9869	39.8685	5.43367	1
CLUST364	tD(GUC)G1	chrVII	+	531610	531681	35.2642	1.00062	0.952765	0.0671731	Ave	21.4885	23.8069	4.70449	1
CLUST034	tS(AGA)B	chrII	+	227075	227156	35.2169	0.999274	0.94644	0.0671731	Ave	35.8858	34.2198	6.46871	1
CLUST010	tL(CAA)A	chrI	+	181141	181254	34.6389	0.982875	0.869589	0.0677965	Ave	31.3743	33.1471	5.20287	1
CLUST701	tI(UAU)L	chrXII	-	605300	605432	34.4909	0.978673	0.850066	0.0677965	Ave	31.7939	34.9215	5.06572	1
CLUST630	tV(AAC)K1	chrXI	-	308144	308217	34.4795	0.97835	0.848569	0.0677965	Ave	33.4772	32.6387	6.16377	1
CLUST170	tY(GUA)D	chrIV	+	946312	946400	34.2563	0.972016	0.819327	0.0677965	Ave	34.2466	36.2416	4.62161	1
CLUST473	tV(AAC)H	chrVIII	-	85298	85371	33.8047	0.959202	0.760971	0.0664707	Ave	40.7601	36.1818	4.83051	1
CLUST234	tR(UCU)E	chrV	+	138666	138737	33.7256	0.956959	0.750886	0.0664707	Ave	39.4322	36.9842	5.99018	1
CLUST851	tF(GAA)N	chrXIV	+	374869	374959	33.7027	0.95631	0.747972	0.0664707	Ave	25.8462	26.421	4.7795	1
CLUST905	tG(GCC)O1	chrXV	-	226611	226681	33.4818	0.950042	0.720055	0.0664707	Ave	37.0063	35.8389	5.14487	1
CLUST582	tL(UAA)J	chrX	-	424432	424515	33.4742	0.949826	0.719097	0.0664707	Ave	39.4057	33.3241	8.57426	1
CLUST596	tY(GUA)J2	chrX	-	542956	543044	33.4028	0.9478	0.710154	0.0664707	Ave	35.6961	34.7248	5.08494	1
CLUST921	tR(ACG)O	chrXV	-	340299	340371	33.3835	0.94725	0.707735	0.0664707	Ave	37.4205	38.2301	5.54997	1
CLUST068	tE(UUC)B	chrII	+	645167	645238	32.8505	0.932127	0.642393	0.063254	Ave	36.3234	33.3557	5.51989	1
CLUST756	tY(GUA)M1	chrXIII	+	168795	168883	32.7509	0.929301	0.630468	0.063254	Ave	36.2523	36.1951	5.97354	1
CLUST265	tV(AAC)E1	chrV	+	438700	438773	32.71	0.928142	0.625601	0.063254	Ave	31.4977	29.0391	4.67761	1
CLUST124	tK(UUU)D	chrIV	+	359577	359672	32.4983	0.922134	0.600653	0.063254	Ave	36.3763	37.635	6.17209	1
CLUST517	tE(CUC)I	chrIX	+	197592	197663	32.4637	0.921152	0.596616	0.063254	Ave	35.3969	34.3487	7.16149	1
CLUST431	tA(AGC)G	chrVII	+	774349	774421	32.4052	0.919492	0.589824	0.063254	Ave	35.3751	34.3516	9.07537	1
CLUST573	tR(UCU)J2	chrX	-	374506	374577	32.3808	0.918799	0.586999	0.063254	Ave	32.7049	34.5736	7.50941	1
CLUST495	tT(UGU)H	chrVIII	+	466990	467061	32.3041	0.916623	0.578171	0.063254	Ave	34.6032	28.2727	6.1814	1
CLUST351	tE(UUC)G2	chrVII	-	401527	401598	31.7863	0.901933	0.520255	0.058369	Ave	39.3993	37.0023	4.63883	1
CLUST032	tG(GCC)B	chrII	-	197629	197699	31.7353	0.900484	0.514708	0.058369	Ave	44.2005	42.034	9.18338	1
CLUST529	tK(CUU)I	chrIX	-	300228	300300	31.5312	0.894693	0.492853	0.058369	Ave	36.0418	35.9284	5.3468	1
CLUST301	tF(GAA)F	chrVI	-	157916	158007	31.4888	0.89349	0.488377	0.058369	Ave	32.8648	32.1675	5.26759	1
CLUST556	tA(AGC)J	chrX	-	197313	197385	30.5885	0.867944	0.398672	0.0521781	Ave	36.6402	33.9228	7.12333	1
CLUST718	tL(UAG)L2	chrXII	+	732090	732190	30.3164	0.860224	0.373649	0.0521781	Ave	21.8015	22.3184	4.07655	1
CLUST357	tF(GAA)G	chrVII	-	440716	440807	30.1726	0.856143	0.360821	0.0521781	Ave	35.7716	35.7369	6.31826	1
CLUST313	tY(GUA)F2	chrVI	-	210619	210707	30.0589	0.852917	0.350882	0.0521781	Ave	35.1608	36.9278	5.65516	1
CLUST306	tG(GCC)F2	chrVI	-	180974	181044	30.036	0.852268	0.348901	0.0521781	Ave	35.1036	34.1965	11.5614	1
CLUST277	tR(ACG)E	chrV	-	492352	492424	30.0272	0.852018	0.348141	0.0521781	Ave	35.1648	38.4602	6.80305	1
CLUST049	tR(UCU)B	chrII	+	405878	405949	29.6725	0.841952	0.318406	0.0451391	Ave	30.5837	34.625	6.74316	1
CLUST368	tD(GUC)G2	chrVII	-	544577	544648	29.6686	0.841842	0.31809	0.0451391	Ave	31.3439	30.7479	5.74847	1
CLUST989	tM(CAU)P	chrXVI	-	338848	338919	29.6508	0.841336	0.316641	0.0451391	Ave	35.5922	33.3152	5.81301	1
CLUST331	tL(CAA)G1	chrVII	+	205521	205634	29.5408	0.838217	0.307808	0.0451391	Ave	30.3867	33.1612	6.49026	1
CLUST818	tA(AGC)M2	chrXIII	-	768369	768441	29.3035	0.831483	0.289298	0.0451391	Ave	41.2334	41.9692	5.54664	1
CLUST084	tP(AGG)C	chrIII	-	123577	123648	29.2806	0.830834	0.287553	0.0451391	Ave	24.1736	26.7612	5.56796	1
CLUST1036	tN(GUU)P	chrXVI	+	810676	810749	28.9491	0.821428	0.26308	0.0377481	Ave	32.8874	31.9323	9.19889	1
CLUST441	tG(GCC)G1	chrVII	+	845649	845719	28.4947	0.808533	0.231926	0.0377481	Ave	43.2829	41.9627	8.90572	1
CLUST143	tR(UCU)D	chrIV	+	568882	568953	28.3108	0.803315	0.220095	0.0377481	Ave	31.1661	34.1432	5.42604	1
CLUST312	tA(AGC)F	chrVI	-	204924	204996	28.2894	0.802709	0.218748	0.0377481	Ave	35.3774	31.597	8.71203	1
CLUST874	tN(GUU)N2	chrXIV	+	632599	632672	28.2242	0.800856	0.214672	0.0377481	Ave	29.0081	26.2187	6.00928	1
CLUST015	tL(UAA)B1	chrII	+	9583	9666	27.9922	0.794276	0.200635	0.0304788	Ave	34.9062	30.3538	4.99913	1
CLUST580	tW(CCA)J	chrX	-	415931	416036	27.834	0.789785	0.191447	0.0304788	Ave	36.1854	34.1291	5.04791	1
CLUST336	tW(CCA)G1	chrVII	-	287350	287455	27.5775	0.782507	0.177223	0.0304788	Ave	37.3196	39.4725	6.8528	1
CLUST485	tF(GAA)H2	chrVIII	-	358478	358569	27.57	0.782295	0.176812	0.0304788	Ave	34.2563	37.3942	5.92585	1
CLUST083	tE(UUC)C	chrIII	-	82462	82533	27.1846	0.771359	0.156981	0.0304788	Ave	34.8155	34.5841	5.15495	1
CLUST765	tS(AGA)M	chrXIII	-	259158	259239	27.1797	0.771219	0.156739	0.0304788	Ave	33.6907	34.5097	6.14391	1
CLUST255	tE(UUC)E2	chrV	+	354934	355005	26.9843	0.765675	0.14736	0.0237304	Ave	36.9533	38.1095	5.91507	1
CLUST780	tH(GUG)M	chrXIII	+	363064	363135	26.9512	0.764735	0.145814	0.0237304	Ave	39.2293	34.6463	6.65425	1
CLUST161	tQ(UUG)D3	chrIV	-	802731	802802	26.4956	0.751807	0.125783	0.0237304	Ave	39.7844	37.5632	6.96779	1
CLUST189	tX(XXX)D	chrIV	-	1150842	1150941	26.4701	0.751085	0.12473	0.0237304	Ave	41.4664	41.5362	6.8964	1
CLUST478	tA(AGC)H	chrVIII	-	146242	146314	26.3312	0.747143	0.119106	0.0237304	Ave	29.7707	33.9707	5.28999	1
CLUST321	tH(GUG)G1	chrVII	-	110625	110696	25.9356	0.735918	0.104177	0.0177919	Ave	41.5101	39.8695	4.61196	1
CLUST149	tI(AAU)D	chrIV	-	668007	668080	25.8501	0.733492	0.101155	0.0177919	Ave	30.818	33.9258	5.05012	1
CLUST516	tI(AAU)I1	chrIX	-	183440	183513	25.8066	0.732259	0.0996461	0.0177919	Ave	36.3745	36.8143	5.51295	1
CLUST668	tA(UGC)L	chrXII	-	214883	214955	25.6509	0.727841	0.0943852	0.0177919	Ave	37.748	35.021	9.49443	1
CLUST595	tD(GUC)J4	chrX	+	541508	541579	25.3308	0.718758	0.08427	0.0177919	Ave	32.8869	34.4277	4.89664	1
CLUST203	tS(AGA)D3	chrIV	+	1305630	1305712	25.2442	0.716299	0.0816877	0.0177919	Ave	36.8209	33.3335	5.56368	1
CLUST174	tG(GCC)D2	chrIV	+	992832	992902	25.2324	0.715966	0.0813432	0.0177919	Ave	35.8657	36.8355	6.60919	1
CLUST629	tW(CCA)K	chrXI	+	302918	303023	25.1725	0.714267	0.0796026	0.0177919	Ave	38.8812	40.0953	5.83063	1
CLUST574	tV(AAC)J	chrX	+	378360	378433	24.8742	0.7058	0.0713763	0.0128264	Ave	35.2558	33.4674	6.5283	1
CLUST191	tM(CAU)D	chrIV	+	1175829	1175901	24.2859	0.689108	0.0571955	0.0128264	Ave	40.4839	41.4575	6.18959	1
CLUST245	tQ(UUG)E1	chrV	+	250286	250357	24.2312	0.687558	0.0560072	0.0128264	Ave	33.4451	36.4654	4.91718	1
CLUST370	tS(AGA)G	chrVII	-	561662	561743	24.02	0.681564	0.0516406	0.0128264	Ave	43.3867	42.4839	7.69016	1
CLUST688	tQ(UUG)L	chrXII	-	448650	448721	23.8036	0.675423	0.0473947	0.0088769	Ave	20.009	21.1426	2.44986	1
CLUST427	tR(UCU)G3	chrVII	+	736340	736411	23.7629	0.674267	0.0466357	0.0088769	Ave	40.9129	43.9409	6.38833	1
CLUST352	tR(UCU)G1	chrVII	+	405470	405541	23.7629	0.674267	0.0466357	0.0088769	Ave	30.9808	32.4977	5.35655	1
CLUST790	tD(GUC)M	chrXIII	+	463554	463625	23.7629	0.674267	0.0466357	0.0088769	Ave	33.5603	31.7372	5.07494	1
CLUST1045	tI(AAU)P2	chrXVI	-	880296	880369	23.7323	0.673401	0.0460737	0.0088769	Ave	34.4221	37.2131	5.65858	1
CLUST704	tL(CAA)L	chrXII	+	628383	628497	23.629	0.670469	0.0442136	0.0088769	Ave	32.3599	34.7755	5.51589	1
CLUST548	tE(UUC)J	chrX	-	115939	116010	23.4847	0.666374	0.0417219	0.0088769	Cold	37.2112	35.0902	5.46713	1
CLUST713	tV(AAC)L	chrXII	-	687859	687932	23.3432	0.662359	0.0393956	0.0088769	Cold	30.3709	30.6609	3.3126	1
CLUST935	tD(GUC)O	chrXV	+	571958	572029	23.0918	0.655226	0.0355335	0.0088769	Cold	38.8918	38.5509	5.81762	1
CLUST268	tI(AAU)E1	chrV	-	443202	443275	23.0597	0.654316	0.0350651	0.0088769	Cold	40.5812	38.3834	7.6743	1
CLUST770	tE(UUC)M	chrXIII	+	290801	290872	23.0509	0.654066	0.0349372	0.0088769	Cold	30.7829	32.7393	5.37474	1
CLUST145	tR(ACG)D	chrIV	-	619969	620041	22.9464	0.651101	0.0334512	0.00588753	Cold	35.1596	35.3838	4.00742	1
CLUST575	tM(CAU)J1	chrX	-	391043	391115	22.93	0.650635	0.0331849	0.00588753	Cold	33.0465	30.7666	8.75511	1
CLUST588	tM(CAU)J3	chrX	-	517813	517884	22.7194	0.64466	0.0304091	0.00588753	Cold	33.672	30.8583	4.08787	1
CLUST283	tI(AAU)E2	chrV	-	551285	551358	22.5954	0.641142	0.0288498	0.00588753	Cold	29.7567	27.5425	6.14472	1
CLUST532	tT(AGU)I2	chrIX	+	325748	325820	22.561	0.640165	0.0284295	0.00588753	Cold	30.6203	31.9504	5.46024	1
CLUST581	tM(CAU)J2	chrX	+	422937	423009	22.5126	0.638793	0.0278476	0.00588753	Cold	26.7287	24.3865	9.16158	1
CLUST263	tK(CUU)E2	chrV	-	435752	435824	22.2204	0.630499	0.0245455	0.00588753	Cold	32.7873	32.4941	6.18091	1
CLUST965	tP(UGG)O3	chrXV	+	980683	980787	22.1708	0.629094	0.0240207	0.00588753	Cold	35.8027	36.6387	6.48509	1
CLUST130	tS(AGA)D1	chrIV	+	437772	437853	22.0636	0.626051	0.0229185	0.00588753	Cold	34.9024	33.6049	6.20144	1
CLUST753	tR(UCU)M2	chrXIII	-	131825	131896	22.0343	0.625219	0.0226244	0.00588753	Cold	36.5009	38.6693	6.71802	1
CLUST867	tP(UGG)N2	chrXIV	+	568115	568217	21.9857	0.623842	0.0221458	0.00373508	Cold	41.0213	36.1269	5.75381	1
CLUST624	tA(AGC)K1	chrXI	+	219895	219967	21.983	0.623766	0.0221194	0.00373508	Cold	37.3018	33.2169	8.18641	1
CLUST781	tV(AAC)M1	chrXIII	-	372445	372518	21.9564	0.623009	0.0218604	0.00373508	Cold	31.6998	28.854	5.0018	1
CLUST426	tN(GUU)G	chrVII	+	731137	731210	21.7496	0.617142	0.0199392	0.00373508	Cold	27.7416	31.5487	6.97011	1
CLUST610	tL(UAA)K	chrXI	+	84208	84291	21.4051	0.607366	0.0170645	0.00373508	Cold	34.3592	30.1334	8.57452	1
CLUST250	tS(UGA)E	chrV	-	288443	288524	20.99	0.595588	0.0140768	0.00226185	Cold	28.0628	28.6242	9.41557	1
CLUST719	tI(AAU)L1	chrXII	+	734802	734875	20.9625	0.594808	0.0139094	0.00226185	Cold	10.728	15.8517	2.471	1
CLUST262	tH(GUG)E2	chrV	-	434541	434612	20.6894	0.587058	0.01223	0.00226185	Cold	37.3391	39.4359	7.4546	1
CLUST708	tA(AGC)L	chrXII	-	656934	657006	19.5501	0.554732	0.00700416	0.00130448	Cold	31.6552	32.7638	7.6761	1
CLUST127	tA(AGC)D	chrIV	+	410379	410451	19.4953	0.553176	0.00681302	0.00130448	Cold	32.117	31.6103	7.51126	1
CLUST434	tA(UGC)G	chrVII	+	794417	794489	19.4392	0.551583	0.00662218	0.00130448	Cold	34.8995	35.2372	4.9473	1
CLUST323	tK(UUU)G1	chrVII	+	115488	115583	19.0821	0.541451	0.00551674	0.00130448	Cold	34.2067	34.6185	6.06859	1
CLUST816	tR(UCU)M1	chrXIII	-	747892	747963	18.8894	0.535983	0.00499209	0.000714718	Cold	35.0912	38.4229	5.57384	1
CLUST129	tT(AGU)D	chrIV	-	434264	434336	18.675	0.529899	0.00446166	0.000714718	Cold	37.6525	38.0578	6.65346	1
CLUST194	tK(CUU)D1	chrIV	+	1201750	1201822	18.2705	0.518424	0.00359806	0.000714718	Cold	34.6774	34.5818	5.32271	1
CLUST577	tG(GCC)J1	chrX	-	396726	396796	18.1202	0.514159	0.00331796	0.000714718	Cold	33.7712	32.0602	5.40572	1
CLUST381	tC(GCA)G	chrVII	-	707108	707179	18.0436	0.511984	0.00318286	0.000714718	Cold	39.0955	42.9641	6.72372	1
CLUST206	tK(CUU)D2	chrIV	-	1352466	1352538	17.9745	0.510025	0.00306552	0.000370981	Cold	34.0669	36.7656	5.3897	1
CLUST567	tR(UCU)J1	chrX	+	355374	355445	17.8906	0.507642	0.00292814	0.000370981	Cold	36.9577	39.0291	7.56283	1
CLUST639	tL(CAA)K	chrXI	+	458557	458670	17.8673	0.506982	0.00289112	0.000370981	Cold	36.2605	38.9302	4.99263	1
CLUST298	tN(GUU)F	chrVI	-	137486	137559	17.7845	0.504633	0.00276269	0.000370981	Cold	28.0438	27.6027	5.08187	1
CLUST341	tE(UUC)G1	chrVII	+	328583	328654	17.144	0.486458	0.00193203	0.000370981	Cold	34.3142	36.5139	5.52393	1
CLUST636	tV(AAC)K2	chrXI	+	379680	379753	17.0651	0.484219	0.00184739	0.000370981	Cold	30.1765	28.8253	5.12819	1
CLUST1040	tA(AGC)P	chrXVI	+	856902	856974	17.0383	0.483459	0.00181944	0.000370981	Cold	35.365	38.1004	4.87805	1
CLUST523	tI(AAU)I2	chrIX	+	210665	210738	16.6644	0.47285	0.0014678	0.000181863	Cold	42.58	45.0838	6.4383	1
CLUST857	tL(CAA)N	chrXIV	+	443006	443119	16.4347	0.466333	0.00128404	0.000181863	Cold	30.9299	35.6918	5.52834	1
CLUST870	tI(AAU)N2	chrXIV	+	602312	602385	16.3238	0.463185	0.00120309	0.000181863	Cold	22.8357	26.6723	3.38851	1
CLUST469	tH(GUG)H	chrVIII	+	62755	62826	16.3123	0.462858	0.00119496	0.000181863	Cold	32.5441	35.026	6.3487	1
CLUST869	tI(AAU)N1	chrXIV	-	569867	569940	15.6488	0.444033	0.00080395	8.39089e-05	Cold	21.7995	22.4939	4.17651	1
CLUST147	tQ(UUG)D2	chrIV	-	645153	645224	15.4154	0.437409	0.000697372	8.39089e-05	Cold	42.1776	42.7781	5.88756	1
CLUST239	tE(UUC)E1	chrV	+	177099	177170	15.0327	0.42655	0.000550619	8.39089e-05	Cold	30.561	31.9703	4.77092	1
CLUST802	tV(AAC)M3	chrXIII	-	586636	586709	14.8885	0.422459	0.000503211	3.62947e-05	Cold	31.0272	31.5205	5.69477	1
CLUST1012	tK(CUU)P	chrXVI	+	582062	582134	14.729	0.417934	0.000455229	3.62947e-05	Cold	31.5804	29.562	5.12974	1
CLUST684	tD(GUC)L1	chrXII	+	427132	427203	14.544	0.412683	0.000404906	3.62947e-05	Cold	28.874	26.019	3.15868	1
CLUST304	tY(GUA)F1	chrVI	+	167437	167525	14.0808	0.399542	0.000300819	3.62947e-05	Cold	27.4958	29.6769	4.15882	1
CLUST937	tG(CCC)O	chrXV	-	594354	594425	13.8054	0.391725	0.000251399	1.46526e-05	Cold	28.0284	28.761	4.09095	1
CLUST101	tT(AGU)C	chrIII	+	295484	295556	13.5375	0.384125	0.000210737	1.46526e-05	Cold	37.8797	36.7171	4.77823	1
CLUST865	tP(UGG)N1	chrXIV	+	547094	547196	13.4761	0.382383	0.000202328	1.46526e-05	Cold	36.2858	39.6627	5.76149	1
CLUST428	tI(AAU)G	chrVII	+	739122	739195	12.9122	0.366383	0.000138556	5.49291e-06	Cold	30.1031	28.429	6.18348	1
CLUST662	tP(UGG)L	chrXII	+	92548	92650	12.8893	0.365733	0.000136418	5.49291e-06	Cold	35.4018	34.3844	6.67612	1
CLUST096	tS(CGA)C	chrIII	+	227942	228042	12.4861	0.354291	0.000103494	5.49291e-06	Cold	32.0439	38.1609	6.83441	1
CLUST167	tI(UAU)D	chrIV	+	884361	884493	12.3407	0.350166	9.35842e-05	5.49291e-06	Cold	36.7926	44.8752	7.25025	1
CLUST631	tH(GUG)K	chrXI	-	313401	313472	11.1913	0.31755	4.13911e-05	1.90076e-06	Cold	32.07	35.6657	4.50377	1
CLUST044	tQ(UUG)B	chrII	+	350827	350898	10.7166	0.304083	2.92491e-05	6.02927e-07	Cold	30.6665	30.8856	3.94067	1
CLUST614	tE(UUC)K	chrXI	-	141018	141089	10.6198	0.301334	2.72278e-05	6.02927e-07	Cold	37.7083	33.2444	4.68699	1
CLUST459	tT(UGU)G2	chrVII	+	1004216	1004287	10.1757	0.288733	1.95446e-05	6.02927e-07	Cold	23.8378	24.0162	6.62306	1
CLUST329	tK(CUU)G2	chrVII	-	185714	185786	10.1017	0.286634	1.8485e-05	6.02927e-07	Cold	27.237	28.707	3.55367	1
CLUST644	tD(GUC)K	chrXI	-	513332	513403	9.90899	0.281166	1.59756e-05	1.73864e-07	Cold	30.5533	30.1568	4.68339	1
CLUST579	tK(CUU)J	chrX	+	414966	415038	9.17039	0.260208	9.04818e-06	1.73864e-07	Cold	26.1432	28.8205	4.08508	1
CLUST276	tE(UUC)E3	chrV	-	487331	487402	9.00447	0.255501	7.94728e-06	1.73864e-07	Cold	35.222	33.0513	4.50394	1
CLUST734	tK(UUU)L	chrXII	+	875376	875471	8.67674	0.246201	6.13724e-06	4.51227e-08	Cold	29.434	31.6779	6.75483	1
CLUST746	tI(AAU)L2	chrXII	-	1052071	1052144	8.59243	0.243809	5.73976e-06	4.51227e-08	Cold	30.6088	26.6962	5.01806	1
CLUST894	tT(AGU)O1	chrXV	+	113802	113874	8.38446	0.237908	4.86192e-06	4.51227e-08	Cold	28.0206	24.553	5.52086	1
CLUST367	tE(UUC)G3	chrVII	+	541850	541921	7.63941	0.216767	2.65686e-06	1.04095e-08	Cold	36.025	34.4082	6.67938	1
CLUST173	tS(AGA)D2	chrIV	-	980974	981055	7.62414	0.216334	2.62375e-06	1.04095e-08	Cold	35.7656	38.221	5.19699	1
CLUST439	tR(UCU)G2	chrVII	-	828723	828794	5.83295	0.165509	5.76587e-07	3.63552e-10	Cold	31.5599	31.5486	6.2931	1
CLUST139	tQ(UUG)D1	chrIV	+	520972	521043	5.54831	0.157432	4.49573e-07	3.63552e-10	Cold	29.6701	27.7659	7.10874	1
CLUST533	tD(GUC)I2	chrIX	-	336349	336420	5.42854	0.154034	4.04615e-07	3.63552e-10	Cold	33.1701	31.7595	5.46297	1
CLUST922	tT(AGU)O2	chrXV	-	354041	354113	5.06229	0.143642	2.92458e-07	3.63552e-10	Cold	33.0993	35.6954	5.58036	1
CLUST213	tL(CAA)D	chrIV	-	1461715	1461829	3.39239	0.0962587	6.35497e-08	6.04623e-12	Cold	36.0777	39.1524	5.64807	1
CLUST981	tE(UUC)P	chrXVI	-	210192	210263	2.75067	0.0780497	3.46368e-08	5.23058e-13	Cold	38.4987	35.6	6.26702	1

## Sheet: Table S5
Supplemental Table S5. Raw reads per position
#Chromosome	Start	Stop	Strand	Reads_E1-Smp1	Reads_E1-Smp2	Reads_E1-Smp3	Tags_E1-Smp1	Tags_E1-Smp2	Tags_E1-Smp3	Insertion	Cluster
chrI	20196	20197	-	0	0	0	0	0	0	SITE0003	CLUST001
chrI	31120	31121	-	0	761	0	0	1	0	SITE0005	CLUST002
chrI	36260	36261	-	0	0	0	0	0	0	SITE0006	CLUST003
chrI	95409	95410	-	0	0	0	0	0	0	SITE0008	CLUST004
chrI	105198	105199	-	0	0	0	0	0	0	SITE0009	CLUST005
chrI	134992	134993	-	0	0	0	0	0	0	SITE0013	CLUST006
chrI	139133	139134	+	12058	0	0	1	0	0	SITE0014	CLUST007
chrI	139134	139135	+	129720	88735	106923	16	22	31	SITE0015	CLUST007
chrI	139135	139136	+	10084	4506	1483	2	5	4	SITE0016	CLUST007
chrI	139136	139137	+	63017	18959	19910	5	3	3	SITE0017	CLUST007
chrI	139136	139137	-	0	0	1036	0	0	1	SITE0019	CLUST007
chrI	139137	139138	-	66402	56463	113367	22	20	25	SITE0021	CLUST007
chrI	139138	139139	+	0	1865	0	0	1	0	SITE0022	CLUST007
chrI	139138	139139	-	36819	16807	12756	5	3	2	SITE0023	CLUST007
chrI	139139	139140	-	2492	10719	594	2	2	1	SITE0024	CLUST007
chrI	139141	139142	-	0	0	4538	0	0	1	SITE0025	CLUST007
chrI	156696	156697	+	0	0	0	0	0	0	SITE0026	CLUST008
chrI	166250	166251	+	241	0	8623	1	0	1	SITE0028	CLUST009
chrI	166251	166252	+	0	0	0	0	0	0	SITE0029	CLUST009
chrI	166252	166253	+	48448	97103	163916	18	28	29	SITE0030	CLUST009
chrI	166252	166253	-	0	0	4572	0	0	1	SITE0031	CLUST009
chrI	166253	166254	+	9415	29090	12438	8	9	8	SITE0032	CLUST009
chrI	166253	166254	-	74	0	6690	1	0	1	SITE0033	CLUST009
chrI	166254	166255	+	36655	34429	17932	7	10	6	SITE0034	CLUST009
chrI	166255	166256	+	397	243	0	1	1	0	SITE0035	CLUST009
chrI	166254	166255	-	194	4555	0	1	2	0	SITE0036	CLUST009
chrI	166255	166256	-	81517	94242	80463	16	26	18	SITE0037	CLUST009
chrI	166256	166257	-	35546	31610	70057	11	12	18	SITE0038	CLUST009
chrI	166257	166258	-	1703	15231	35304	3	7	10	SITE0039	CLUST009
chrI	166258	166259	-	141	0	1258	1	0	1	SITE0040	CLUST009
chrI	181115	181116	+	0	9816	0	0	1	0	SITE0044	CLUST010
chrI	181123	181124	+	0	87	3673	0	1	2	SITE0046	CLUST010
chrI	181125	181126	+	36442	59966	124812	13	15	13	SITE0048	CLUST010
chrI	181126	181127	+	1169	2858	31159	3	3	8	SITE0050	CLUST010
chrI	181127	181128	+	0	0	1733	0	0	1	SITE0051	CLUST010
chrI	181126	181127	-	0	440	0	0	1	0	SITE0052	CLUST010
chrI	181128	181129	+	28688	0	0	2	0	0	SITE0053	CLUST010
chrI	181128	181129	-	22220	30387	36777	6	16	8	SITE0055	CLUST010
chrI	181129	181130	-	30658	9248	22032	2	6	8	SITE0058	CLUST010
chrI	181131	181132	+	0	0	2200	0	0	1	SITE0059	CLUST010
chrI	181131	181132	-	0	0	8606	0	0	1	SITE0061	CLUST010
chrI	181132	181133	+	24716	0	0	1	0	0	SITE0062	CLUST010
chrI	181132	181133	-	0	1748	0	0	1	0	SITE0064	CLUST010
chrI	182614	182615	+	32235	103771	28720	11	13	9	SITE0071	CLUST011
chrI	182615	182616	+	12478	28050	26914	3	10	6	SITE0072	CLUST011
chrI	182616	182617	+	62063	44002	159384	16	13	21	SITE0074	CLUST011
chrI	182617	182618	-	76931	15478	50067	16	12	11	SITE0077	CLUST011
chrI	182618	182619	-	27788	968	33711	7	1	7	SITE0079	CLUST011
chrI	182619	182620	-	62360	76957	58635	18	25	17	SITE0080	CLUST011
chrI	182620	182621	-	0	62	137	0	1	1	SITE0081	CLUST011
chrI	182960	182961	+	0	0	0	0	0	0	SITE0085	CLUST012
chrI	197162	197163	-	0	0	0	0	0	0	SITE0089	CLUST013
chrI	207798	207799	-	0	0	0	0	0	0	SITE0090	CLUST014
chrII	9559	9560	+	159	0	8039	1	0	1	SITE0091	CLUST015
chrII	9564	9565	+	0	1097	57	0	1	1	SITE0093	CLUST015
chrII	9567	9568	+	26890	22713	46768	10	11	7	SITE0097	CLUST015
chrII	9567	9568	-	0	2501	167	0	1	2	SITE0098	CLUST015
chrII	9568	9569	+	0	0	7791	0	0	2	SITE0099	CLUST015
chrII	9569	9570	+	6626	0	7058	1	0	1	SITE0100	CLUST015
chrII	9569	9570	-	0	5776	0	0	1	0	SITE0102	CLUST015
chrII	9571	9572	+	11702	9295	39718	2	2	5	SITE0103	CLUST015
chrII	9570	9571	-	19549	33169	76865	5	8	12	SITE0104	CLUST015
chrII	9573	9574	+	0	1803	0	0	1	0	SITE0106	CLUST015
chrII	9572	9573	-	285	0	1159	1	0	1	SITE0107	CLUST015
chrII	9574	9575	-	18380	11400	25936	3	3	6	SITE0109	CLUST015
chrII	9576	9577	-	0	0	11527	0	0	1	SITE0111	CLUST015
chrII	9577	9578	-	0	0	1057	0	0	1	SITE0112	CLUST015
chrII	20363	20364	+	0	0	0	0	0	0	SITE0113	CLUST016
chrII	36379	36380	+	0	0	0	0	0	0	SITE0114	CLUST017
chrII	36380	36381	+	1422	13020	403	4	7	2	SITE0115	CLUST017
chrII	36381	36382	+	0	445	11925	0	1	2	SITE0116	CLUST017
chrII	36382	36383	+	7167	32116	44463	5	15	16	SITE0117	CLUST017
chrII	36382	36383	-	0	0	5549	0	0	1	SITE0119	CLUST017
chrII	36383	36384	+	86	551	1038	1	1	1	SITE0120	CLUST017
chrII	36383	36384	-	30534	55219	57072	3	10	7	SITE0121	CLUST017
chrII	36384	36385	-	435	2013	15250	1	1	2	SITE0123	CLUST017
chrII	36385	36386	-	62466	47656	142025	11	18	21	SITE0124	CLUST017
chrII	36386	36387	+	0	0	0	0	0	0	SITE0125	CLUST017
chrII	36386	36387	-	0	3468	0	0	1	0	SITE0126	CLUST017
chrII	36388	36389	-	0	0	0	0	0	0	SITE0127	CLUST017
chrII	62400	62401	-	0	0	0	0	0	0	SITE0131	CLUST018
chrII	72366	72367	-	0	0	0	0	0	0	SITE0133	CLUST019
chrII	107702	107703	+	0	0	0	0	0	0	SITE0134	CLUST020
chrII	126583	126584	+	0	0	0	0	0	0	SITE0137	CLUST021
chrII	132361	132362	+	0	1243	0	0	1	0	SITE0138	CLUST022
chrII	137539	137540	-	0	0	0	0	0	0	SITE0140	CLUST023
chrII	141055	141056	-	0	0	0	0	0	0	SITE0145	CLUST024
chrII	151689	151690	-	0	0	0	0	0	0	SITE0147	CLUST025
chrII	160140	160141	+	0	0	0	0	0	0	SITE0149	CLUST026
chrII	160630	160631	+	0	0	0	0	0	0	SITE0150	CLUST027
chrII	162029	162030	+	0	0	0	0	0	0	SITE0151	CLUST028
chrII	184673	184674	-	0	0	0	0	0	0	SITE0153	CLUST029
chrII	187977	187978	+	0	0	0	0	0	0	SITE0154	CLUST030
chrII	197470	197471	+	0	0	478	0	0	1	SITE0157	CLUST031
chrII	197473	197474	+	4617	0	0	1	0	0	SITE0158	CLUST031
chrII	197476	197477	+	0	0	4097	0	0	1	SITE0159	CLUST031
chrII	197479	197480	+	54972	22855	31154	17	19	19	SITE0162	CLUST031
chrII	197480	197481	+	18134	10634	15778	10	6	10	SITE0163	CLUST031
chrII	197479	197480	-	0	2432	995	0	2	1	SITE0164	CLUST031
chrII	197480	197481	-	463	1386	0	1	1	0	SITE0165	CLUST031
chrII	197481	197482	-	0	0	4785	0	0	1	SITE0167	CLUST031
chrII	197482	197483	+	0	0	561	0	0	1	SITE0168	CLUST031
chrII	197482	197483	-	74646	53800	86778	24	29	30	SITE0169	CLUST031
chrII	197483	197484	-	24709	6201	37046	6	7	8	SITE0170	CLUST031
chrII	197488	197489	-	0	0	14101	0	0	1	SITE0173	CLUST031
chrII	197708	197709	+	51	37854	5309	1	3	3	SITE0179	CLUST032
chrII	197708	197709	-	0	2055	0	0	1	0	SITE0180	CLUST032
chrII	197709	197710	+	8752	30640	34867	6	7	7	SITE0181	CLUST032
chrII	197710	197711	+	15870	11518	2072	5	3	2	SITE0182	CLUST032
chrII	197709	197710	-	0	0	227	0	0	1	SITE0183	CLUST032
chrII	197710	197711	-	0	0	0	0	0	0	SITE0184	CLUST032
chrII	197711	197712	+	0	0	1153	0	0	1	SITE0185	CLUST032
chrII	197712	197713	+	1376	2873	242	3	4	1	SITE0186	CLUST032
chrII	197711	197712	-	16411	5445	4086	3	3	5	SITE0187	CLUST032
chrII	197712	197713	-	21591	26410	9945	4	9	7	SITE0188	CLUST032
chrII	197713	197714	-	2044	16971	7530	2	5	6	SITE0189	CLUST032
chrII	197714	197715	-	0	3987	0	0	1	0	SITE0190	CLUST032
chrII	197715	197716	-	7898	4267	9234	2	3	5	SITE0191	CLUST032
chrII	198052	198053	+	0	0	0	0	0	0	SITE0198	CLUST033
chrII	198055	198056	+	0	1921	0	0	2	0	SITE0201	CLUST033
chrII	227059	227060	+	23792	103639	98208	12	19	17	SITE0207	CLUST034
chrII	227060	227061	+	0	8104	0	0	2	0	SITE0208	CLUST034
chrII	227061	227062	+	0	2578	0	0	1	0	SITE0209	CLUST034
chrII	227063	227064	+	993	1999	0	1	1	0	SITE0211	CLUST034
chrII	227062	227063	-	24325	66592	145424	11	19	22	SITE0212	CLUST034
chrII	227063	227064	-	6510	210	37724	1	2	8	SITE0213	CLUST034
chrII	233060	233061	+	0	0	0	0	0	0	SITE0215	CLUST035
chrII	235935	235936	+	0	0	0	0	0	0	SITE0216	CLUST036
chrII	253638	253639	-	0	0	0	0	0	0	SITE0217	CLUST037
chrII	266360	266361	+	0	0	0	0	0	0	SITE0220	CLUST038
chrII	266361	266362	+	1658	11027	7366	2	6	4	SITE0221	CLUST038
chrII	266363	266364	+	21447	21583	101291	7	12	22	SITE0223	CLUST038
chrII	266364	266365	+	307	695	0	1	1	0	SITE0225	CLUST038
chrII	266364	266365	-	24524	8056	47973	6	4	9	SITE0226	CLUST038
chrII	266365	266366	-	0	1355	0	0	1	0	SITE0228	CLUST038
chrII	266366	266367	-	6417	76358	123619	9	18	30	SITE0229	CLUST038
chrII	266367	266368	-	1393	0	0	1	0	0	SITE0230	CLUST038
chrII	310516	310517	-	0	5393	0	0	1	0	SITE0235	CLUST039
chrII	313223	313224	+	0	3491	0	0	1	0	SITE0237	CLUST040
chrII	326864	326865	+	0	2548	0	0	1	0	SITE0240	CLUST041
chrII	326871	326872	-	243	0	0	1	0	0	SITE0241	CLUST041
chrII	326874	326875	+	611	0	31137	2	0	4	SITE0244	CLUST041
chrII	326875	326876	+	5357	0	0	1	0	0	SITE0245	CLUST041
chrII	326876	326877	+	77022	228225	328951	23	55	52	SITE0246	CLUST041
chrII	326877	326878	-	6071	638	2201	1	1	3	SITE0248	CLUST041
chrII	326878	326879	+	0	76	0	0	1	0	SITE0249	CLUST041
chrII	326878	326879	-	415	668	1469	1	1	1	SITE0250	CLUST041
chrII	326879	326880	+	186	0	0	1	0	0	SITE0251	CLUST041
chrII	326879	326880	-	218694	116536	254325	32	33	45	SITE0252	CLUST041
chrII	326880	326881	+	104	0	0	1	0	0	SITE0253	CLUST041
chrII	326881	326882	+	0	0	0	0	0	0	SITE0255	CLUST041
chrII	326882	326883	-	183	0	0	1	0	0	SITE0258	CLUST041
chrII	326883	326884	-	0	0	0	0	0	0	SITE0259	CLUST041
chrII	344874	344875	+	11547	0	0	1	0	0	SITE0261	CLUST042
chrII	347583	347584	+	0	3343	0	0	1	0	SITE0263	CLUST043
chrII	347585	347586	+	0	5348	3996	0	1	1	SITE0265	CLUST043
chrII	347586	347587	+	123849	82106	87388	16	24	19	SITE0266	CLUST043
chrII	347587	347588	+	0	9567	0	0	1	0	SITE0267	CLUST043
chrII	347588	347589	+	0	1217	61	0	1	1	SITE0268	CLUST043
chrII	347589	347590	-	27025	16894	45897	14	18	19	SITE0271	CLUST043
chrII	347590	347591	-	4007	60	5848	1	1	1	SITE0272	CLUST043
chrII	347591	347592	-	0	2591	1181	0	3	2	SITE0274	CLUST043
chrII	350810	350811	+	0	2699	0	0	1	0	SITE0276	CLUST044
chrII	350811	350812	+	68	15653	30647	1	7	7	SITE0277	CLUST044
chrII	350812	350813	+	0	0	0	0	0	0	SITE0279	CLUST044
chrII	350813	350814	-	8521	0	2607	1	0	1	SITE0282	CLUST044
chrII	350814	350815	+	0	0	56	0	0	1	SITE0283	CLUST044
chrII	350814	350815	-	1256	6712	14153	3	3	5	SITE0284	CLUST044
chrII	350815	350816	-	4248	3917	497	1	1	1	SITE0286	CLUST044
chrII	350816	350817	-	0	1756	2087	0	1	1	SITE0287	CLUST044
chrII	350819	350820	-	0	2841	0	0	1	0	SITE0288	CLUST044
chrII	355679	355680	-	0	0	0	0	0	0	SITE0290	CLUST045
chrII	385095	385096	+	0	0	0	0	0	0	SITE0293	CLUST046
chrII	394042	394043	+	0	0	0	0	0	0	SITE0295	CLUST047
chrII	401296	401297	+	14033	0	0	1	0	0	SITE0296	CLUST048
chrII	405861	405862	+	0	0	71	0	0	1	SITE0298	CLUST049
chrII	405862	405863	+	30081	19990	60494	4	8	14	SITE0299	CLUST049
chrII	405864	405865	+	23428	0	0	1	0	0	SITE0302	CLUST049
chrII	405865	405866	-	99763	51795	92467	25	20	21	SITE0304	CLUST049
chrII	405944	405945	+	10906	5779	10165	3	1	3	SITE0310	CLUST050
chrII	405945	405946	+	8689	0	0	1	0	0	SITE0311	CLUST050
chrII	405947	405948	-	11434	12616	43388	1	2	2	SITE0314	CLUST050
chrII	405948	405949	-	0	0	12232	0	0	1	SITE0315	CLUST050
chrII	408916	408917	-	0	0	0	0	0	0	SITE0317	CLUST051
chrII	408984	408985	+	0	9612	0	0	1	0	SITE0318	CLUST052
chrII	433672	433673	+	0	0	0	0	0	0	SITE0320	CLUST053
chrII	444797	444798	-	0	0	0	0	0	0	SITE0321	CLUST054
chrII	461500	461501	+	0	0	0	0	0	0	SITE0322	CLUST055
chrII	465717	465718	-	0	0	0	0	0	0	SITE0323	CLUST056
chrII	469920	469921	+	0	0	0	0	0	0	SITE0324	CLUST057
chrII	495025	495026	-	0	0	0	0	0	0	SITE0328	CLUST058
chrII	496238	496239	+	0	5240	0	0	1	0	SITE0330	CLUST059
chrII	522747	522748	+	0	0	0	0	0	0	SITE0333	CLUST060
chrII	526660	526661	-	0	0	0	0	0	0	SITE0334	CLUST061
chrII	564522	564523	-	0	0	0	0	0	0	SITE0335	CLUST062
chrII	575511	575512	+	0	0	0	0	0	0	SITE0336	CLUST063
chrII	592195	592196	-	0	0	0	0	0	0	SITE0337	CLUST064
chrII	594935	594936	-	0	0	0	0	0	0	SITE0339	CLUST065
chrII	627662	627663	-	0	0	0	0	0	0	SITE0341	CLUST066
chrII	643087	643088	+	2901	0	0	2	0	0	SITE0345	CLUST067
chrII	643088	643089	+	762	4000	18775	1	1	2	SITE0346	CLUST067
chrII	643089	643090	+	0	2759	22641	0	2	4	SITE0347	CLUST067
chrII	643088	643089	-	0	1299	0	0	1	0	SITE0348	CLUST067
chrII	643090	643091	+	15488	77041	100631	9	22	19	SITE0349	CLUST067
chrII	643090	643091	-	0	1469	0	0	1	0	SITE0351	CLUST067
chrII	643091	643092	+	470	0	0	1	0	0	SITE0352	CLUST067
chrII	643091	643092	-	1069	3136	6439	1	1	2	SITE0353	CLUST067
chrII	643092	643093	+	892	0	0	1	0	0	SITE0354	CLUST067
chrII	643092	643093	-	1358	7839	4023	3	3	2	SITE0355	CLUST067
chrII	643093	643094	-	60965	43182	98258	14	19	25	SITE0356	CLUST067
chrII	643094	643095	-	0	568	0	0	1	0	SITE0357	CLUST067
chrII	643095	643096	-	955	0	1847	2	0	1	SITE0358	CLUST067
chrII	645149	645150	+	0	0	814	0	0	1	SITE0360	CLUST068
chrII	645150	645151	+	75045	41041	88024	16	14	14	SITE0361	CLUST068
chrII	645151	645152	+	299	991	0	1	1	0	SITE0362	CLUST068
chrII	645152	645153	-	0	0	2066	0	0	1	SITE0363	CLUST068
chrII	645154	645155	+	0	0	12265	0	0	2	SITE0364	CLUST068
chrII	645153	645154	-	74144	52590	66590	13	17	22	SITE0365	CLUST068
chrII	645154	645155	-	418	0	0	1	0	0	SITE0366	CLUST068
chrII	645157	645158	-	0	1189	1458	0	1	1	SITE0369	CLUST068
chrII	683341	683342	-	0	0	0	0	0	0	SITE0373	CLUST069
chrII	685031	685032	+	0	0	0	0	0	0	SITE0374	CLUST070
chrII	715571	715572	+	0	0	0	0	0	0	SITE0380	CLUST071
chrII	778915	778916	-	0	0	0	0	0	0	SITE0384	CLUST072
chrII	791237	791238	-	0	0	9590	0	0	1	SITE0388	CLUST073
chrII	800205	800206	-	0	0	0	0	0	0	SITE0389	CLUST074
chrII	804509	804510	-	0	0	0	0	0	0	SITE0390	CLUST075
chrII	808503	808504	-	0	0	0	0	0	0	SITE0394	CLUST076
chrIII	21698	21699	+	0	0	0	0	0	0	SITE0399	CLUST077
chrIII	45388	45389	-	0	0	0	0	0	0	SITE0401	CLUST078
chrIII	58958	58959	+	0	0	0	0	0	0	SITE0403	CLUST079
chrIII	63699	63700	-	0	10878	0	0	1	0	SITE0405	CLUST080
chrIII	74190	74191	-	0	1950	0	0	1	0	SITE0412	CLUST081
chrIII	74520	74521	+	0	0	0	0	0	0	SITE0413	CLUST082
chrIII	82546	82547	+	8985	22478	40152	14	16	9	SITE0418	CLUST083
chrIII	82549	82550	-	49989	25641	66950	8	14	26	SITE0421	CLUST083
chrIII	82557	82558	+	0	0	0	0	0	0	SITE0423	CLUST083
chrIII	82560	82561	-	1849	0	0	1	0	0	SITE0425	CLUST083
chrIII	123646	123647	+	0	0	0	0	0	0	SITE0428	CLUST084
chrIII	123653	123654	+	123	0	0	1	0	0	SITE0429	CLUST084
chrIII	123656	123657	+	79508	21349	92255	12	12	17	SITE0431	CLUST084
chrIII	123659	123660	+	0	0	0	0	0	0	SITE0437	CLUST084
chrIII	123659	123660	-	70402	96020	86815	11	20	14	SITE0438	CLUST084
chrIII	123660	123661	+	0	3941	0	0	2	0	SITE0439	CLUST084
chrIII	123661	123662	+	0	0	516	0	0	1	SITE0441	CLUST084
chrIII	123662	123663	+	0	1025	0	0	1	0	SITE0442	CLUST084
chrIII	123663	123664	-	0	2741	17993	0	1	2	SITE0444	CLUST084
chrIII	123665	123666	+	0	0	0	0	0	0	SITE0446	CLUST084
chrIII	123666	123667	-	0	688	0	0	1	0	SITE0448	CLUST084
chrIII	123677	123678	+	0	0	0	0	0	0	SITE0449	CLUST084
chrIII	125498	125499	+	0	0	8204	0	0	1	SITE0451	CLUST085
chrIII	127697	127698	+	0	2312	2777	0	1	1	SITE0454	CLUST086
chrIII	127698	127699	+	11772	51	3717	2	1	2	SITE0455	CLUST086
chrIII	127699	127700	+	3345	26783	49609	9	10	21	SITE0456	CLUST086
chrIII	127700	127701	-	0	607	734	0	1	1	SITE0459	CLUST086
chrIII	127701	127702	-	21887	0	13265	2	0	5	SITE0461	CLUST086
chrIII	127702	127703	-	41230	64615	131028	21	28	25	SITE0462	CLUST086
chrIII	127703	127704	-	0	0	0	0	0	0	SITE0463	CLUST086
chrIII	127704	127705	-	0	9688	0	0	3	0	SITE0464	CLUST086
chrIII	142782	142783	+	0	4256	0	0	2	0	SITE0467	CLUST087
chrIII	142784	142785	+	11599	59856	45544	12	17	17	SITE0469	CLUST087
chrIII	142785	142786	+	697	4656	1455	1	1	1	SITE0470	CLUST087
chrIII	142785	142786	-	2086	1037	0	1	1	0	SITE0472	CLUST087
chrIII	142787	142788	+	0	0	347	0	0	1	SITE0474	CLUST087
chrIII	142787	142788	-	11045	20275	25550	19	22	24	SITE0475	CLUST087
chrIII	142788	142789	-	2426	5683	3382	3	4	2	SITE0476	CLUST087
chrIII	145659	145660	-	0	0	0	0	0	0	SITE0477	CLUST088
chrIII	146972	146973	+	0	0	0	0	0	0	SITE0478	CLUST089
chrIII	168383	168384	+	6981	7859	15288	3	3	4	SITE0485	CLUST090
chrIII	168385	168386	+	57281	79622	116415	17	24	18	SITE0487	CLUST090
chrIII	168386	168387	-	5263	5122	6124	2	3	2	SITE0490	CLUST090
chrIII	168387	168388	+	0	0	0	0	0	0	SITE0491	CLUST090
chrIII	168388	168389	-	46981	61305	114630	15	27	31	SITE0493	CLUST090
chrIII	169069	169070	+	0	0	0	0	0	0	SITE0496	CLUST091
chrIII	174369	174370	+	0	0	0	0	0	0	SITE0497	CLUST092
chrIII	186392	186393	+	0	0	0	0	0	0	SITE0498	CLUST093
chrIII	193731	193732	-	0	0	0	0	0	0	SITE0499	CLUST094
chrIII	218029	218030	+	0	0	0	0	0	0	SITE0500	CLUST095
chrIII	227920	227921	+	107	0	0	1	0	0	SITE0501	CLUST096
chrIII	227921	227922	+	0	0	0	0	0	0	SITE0502	CLUST096
chrIII	227923	227924	-	0	0	6389	0	0	1	SITE0503	CLUST096
chrIII	227925	227926	+	272	6874	18536	1	1	4	SITE0504	CLUST096
chrIII	227926	227927	+	317	10952	1124	1	7	2	SITE0505	CLUST096
chrIII	227927	227928	+	0	13134	6139	0	3	2	SITE0506	CLUST096
chrIII	227928	227929	-	13484	6024	0	3	2	0	SITE0507	CLUST096
chrIII	227929	227930	+	0	0	0	0	0	0	SITE0508	CLUST096
chrIII	227929	227930	-	304	21368	11427	1	4	2	SITE0509	CLUST096
chrIII	227930	227931	-	467	2414	6294	2	1	3	SITE0510	CLUST096
chrIII	227942	227943	+	0	0	0	0	0	0	SITE0513	CLUST096
chrIII	246192	246193	-	0	0	0	0	0	0	SITE0516	CLUST097
chrIII	251566	251567	+	0	0	0	0	0	0	SITE0517	CLUST098
chrIII	254243	254244	-	0	6728	0	0	1	0	SITE0520	CLUST099
chrIII	284270	284271	+	0	0	0	0	0	0	SITE0522	CLUST100
chrIII	295467	295468	+	0	0	7734	0	0	1	SITE0525	CLUST101
chrIII	295468	295469	+	11698	30751	59251	3	3	11	SITE0526	CLUST101
chrIII	295470	295471	-	66	11755	24130	1	1	2	SITE0530	CLUST101
chrIII	295471	295472	-	30809	32067	74761	5	8	10	SITE0531	CLUST101
chrIV	32387	32388	+	0	0	0	0	0	0	SITE0537	CLUST102
chrIV	57916	57917	+	0	0	0	0	0	0	SITE0539	CLUST103
chrIV	83527	83528	-	0	0	53	0	0	1	SITE0551	CLUST104
chrIV	83529	83530	-	0	0	11687	0	0	1	SITE0553	CLUST104
chrIV	83530	83531	+	253	0	1660	1	0	1	SITE0554	CLUST104
chrIV	83531	83532	+	21740	17443	42165	4	6	3	SITE0555	CLUST104
chrIV	83532	83533	+	94396	79789	149936	20	30	29	SITE0556	CLUST104
chrIV	83534	83535	-	281	4456	55411	1	2	4	SITE0562	CLUST104
chrIV	83535	83536	-	23561	130800	107601	14	29	23	SITE0564	CLUST104
chrIV	83536	83537	-	0	1652	0	0	1	0	SITE0565	CLUST104
chrIV	83538	83539	+	0	2534	0	0	1	0	SITE0566	CLUST104
chrIV	100936	100937	-	0	0	0	0	0	0	SITE0570	CLUST105
chrIV	112780	112781	-	0	0	0	0	0	0	SITE0573	CLUST106
chrIV	122986	122987	+	0	0	0	0	0	0	SITE0576	CLUST107
chrIV	159823	159824	+	0	0	0	0	0	0	SITE0582	CLUST108
chrIV	165576	165577	+	0	0	0	0	0	0	SITE0584	CLUST109
chrIV	168571	168572	+	0	0	0	0	0	0	SITE0585	CLUST110
chrIV	172669	172670	-	0	0	0	0	0	0	SITE0587	CLUST111
chrIV	176924	176925	-	0	0	0	0	0	0	SITE0588	CLUST112
chrIV	188697	188698	-	0	0	0	0	0	0	SITE0590	CLUST113
chrIV	218231	218232	-	0	0	0	0	0	0	SITE0591	CLUST114
chrIV	267312	267313	+	0	0	0	0	0	0	SITE0593	CLUST115
chrIV	288951	288952	+	0	0	0	0	0	0	SITE0596	CLUST116
chrIV	296094	296095	-	0	0	0	0	0	0	SITE0598	CLUST117
chrIV	299567	299568	+	0	0	1982	0	0	1	SITE0599	CLUST118
chrIV	300074	300075	+	0	0	0	0	0	0	SITE0600	CLUST119
chrIV	315261	315262	-	0	0	0	0	0	0	SITE0602	CLUST120
chrIV	324931	324932	+	0	0	0	0	0	0	SITE0603	CLUST121
chrIV	336234	336235	+	0	0	0	0	0	0	SITE0604	CLUST122
chrIV	352809	352810	-	0	0	0	0	0	0	SITE0606	CLUST123
chrIV	359559	359560	+	408	0	0	1	0	0	SITE0610	CLUST124
chrIV	359561	359562	+	72160	54610	83267	15	22	24	SITE0612	CLUST124
chrIV	359562	359563	-	0	0	0	0	0	0	SITE0615	CLUST124
chrIV	359564	359565	-	62952	35844	41838	12	13	18	SITE0618	CLUST124
chrIV	363147	363148	-	0	0	0	0	0	0	SITE0622	CLUST125
chrIV	395009	395010	+	0	0	0	0	0	0	SITE0626	CLUST126
chrIV	410361	410362	+	0	0	0	0	0	0	SITE0627	CLUST127
chrIV	410363	410364	+	1505	2055	0	2	1	0	SITE0628	CLUST127
chrIV	410364	410365	+	36264	39869	27569	8	10	4	SITE0629	CLUST127
chrIV	410365	410366	+	15455	3511	0	2	1	0	SITE0630	CLUST127
chrIV	410366	410367	+	747	0	385	1	0	1	SITE0632	CLUST127
chrIV	410365	410366	-	0	0	0	0	0	0	SITE0633	CLUST127
chrIV	410366	410367	-	0	0	7015	0	0	1	SITE0634	CLUST127
chrIV	410367	410368	-	82826	32342	17238	8	13	9	SITE0635	CLUST127
chrIV	410368	410369	-	0	0	0	0	0	0	SITE0636	CLUST127
chrIV	424290	424291	-	0	0	0	0	0	0	SITE0639	CLUST128
chrIV	434346	434347	+	0	4182	0	0	1	0	SITE0642	CLUST129
chrIV	434347	434348	+	0	0	0	0	0	0	SITE0643	CLUST129
chrIV	434348	434349	+	0	7514	16037	0	7	6	SITE0644	CLUST129
chrIV	434349	434350	+	1989	6624	12371	2	4	5	SITE0645	CLUST129
chrIV	434349	434350	-	9566	0	0	1	0	0	SITE0646	CLUST129
chrIV	434350	434351	+	538	14544	0	1	1	0	SITE0647	CLUST129
chrIV	434350	434351	-	1037	8947	4187	1	2	1	SITE0648	CLUST129
chrIV	434351	434352	-	18540	23683	38532	2	6	5	SITE0649	CLUST129
chrIV	434352	434353	-	29145	28935	51460	5	5	6	SITE0650	CLUST129
chrIV	434353	434354	-	0	0	0	0	0	0	SITE0651	CLUST129
chrIV	434358	434359	+	0	0	3098	0	0	1	SITE0652	CLUST129
chrIV	437747	437748	-	0	0	0	0	0	0	SITE0654	CLUST130
chrIV	437750	437751	-	0	0	7781	0	0	1	SITE0655	CLUST130
chrIV	437753	437754	+	10491	0	0	1	0	0	SITE0656	CLUST130
chrIV	437754	437755	+	16769	0	0	2	0	0	SITE0657	CLUST130
chrIV	437755	437756	+	0	0	0	0	0	0	SITE0658	CLUST130
chrIV	437756	437757	+	32732	20513	57048	9	10	9	SITE0659	CLUST130
chrIV	437757	437758	+	13175	202	12653	2	1	4	SITE0661	CLUST130
chrIV	437758	437759	+	0	4176	0	0	1	0	SITE0663	CLUST130
chrIV	437757	437758	-	0	4208	7589	0	2	2	SITE0664	CLUST130
chrIV	437759	437760	-	21820	25093	39274	5	8	8	SITE0667	CLUST130
chrIV	437760	437761	-	1564	0	406	2	0	1	SITE0668	CLUST130
chrIV	437761	437762	-	0	0	0	0	0	0	SITE0669	CLUST130
chrIV	437765	437766	+	404	0	0	1	0	0	SITE0670	CLUST130
chrIV	437765	437766	-	0	0	300	0	0	1	SITE0671	CLUST130
chrIV	447993	447994	-	0	0	0	0	0	0	SITE0674	CLUST131
chrIV	486445	486446	+	0	0	0	0	0	0	SITE0675	CLUST132
chrIV	488882	488883	+	0	0	3446	0	0	1	SITE0678	CLUST133
chrIV	488882	488883	-	0	0	813	0	0	1	SITE0679	CLUST133
chrIV	488883	488884	+	136938	103166	243434	35	42	61	SITE0680	CLUST133
chrIV	488884	488885	+	0	0	0	0	0	0	SITE0681	CLUST133
chrIV	488886	488887	-	128924	165331	319300	39	49	61	SITE0685	CLUST133
chrIV	488887	488888	-	0	2856	0	0	1	0	SITE0687	CLUST133
chrIV	488892	488893	+	0	808	0	0	1	0	SITE0688	CLUST133
chrIV	494904	494905	-	0	0	0	0	0	0	SITE0689	CLUST134
chrIV	500413	500414	-	0	0	0	0	0	0	SITE0691	CLUST135
chrIV	506779	506780	-	0	0	0	0	0	0	SITE0692	CLUST136
chrIV	508123	508124	-	0	0	196	0	0	1	SITE0693	CLUST137
chrIV	519721	519722	+	0	1392	1631	0	1	1	SITE0694	CLUST138
chrIV	519726	519727	+	47472	34401	141262	13	12	24	SITE0696	CLUST138
chrIV	519725	519726	-	0	1368	0	0	1	0	SITE0697	CLUST138
chrIV	519727	519728	+	189	15932	19449	1	4	3	SITE0698	CLUST138
chrIV	519728	519729	+	213	6826	0	1	2	0	SITE0699	CLUST138
chrIV	519729	519730	+	7236	7008	4443	1	2	2	SITE0701	CLUST138
chrIV	519729	519730	-	49348	22428	130855	13	14	33	SITE0702	CLUST138
chrIV	519730	519731	+	17397	0	0	1	0	0	SITE0703	CLUST138
chrIV	519730	519731	-	92	6207	18404	1	3	3	SITE0705	CLUST138
chrIV	519731	519732	-	0	0	1351	0	0	1	SITE0706	CLUST138
chrIV	519733	519734	-	4534	0	0	2	0	0	SITE0708	CLUST138
chrIV	520956	520957	+	0	7370	235	0	4	1	SITE0710	CLUST139
chrIV	520957	520958	+	0	915	12541	0	1	2	SITE0711	CLUST139
chrIV	520959	520960	-	0	8636	7723	0	5	1	SITE0712	CLUST139
chrIV	520960	520961	-	0	12182	0	0	2	0	SITE0713	CLUST139
chrIV	520962	520963	-	269	0	0	1	0	0	SITE0714	CLUST139
chrIV	520966	520967	+	455	0	0	1	0	0	SITE0715	CLUST139
chrIV	520965	520966	-	0	0	2596	0	0	1	SITE0716	CLUST139
chrIV	521426	521427	-	0	0	0	0	0	0	SITE0717	CLUST140
chrIV	542416	542417	-	0	1341	0	0	1	0	SITE0718	CLUST141
chrIV	558298	558299	-	0	0	0	0	0	0	SITE0720	CLUST142
chrIV	568853	568854	+	410	0	0	1	0	0	SITE0721	CLUST143
chrIV	568860	568861	-	0	0	397	0	0	1	SITE0722	CLUST143
chrIV	568865	568866	+	55819	52753	120024	7	18	17	SITE0724	CLUST143
chrIV	568866	568867	+	0	7556	0	0	1	0	SITE0726	CLUST143
chrIV	568867	568868	-	0	5627	0	0	1	0	SITE0729	CLUST143
chrIV	568868	568869	-	53562	45244	16331	11	23	9	SITE0731	CLUST143
chrIV	568870	568871	+	0	52	0	0	1	0	SITE0733	CLUST143
chrIV	568870	568871	-	971	1334	0	1	2	0	SITE0734	CLUST143
chrIV	568948	568949	+	332	5583	7167	1	2	1	SITE0737	CLUST144
chrIV	568950	568951	-	0	0	0	0	0	0	SITE0741	CLUST144
chrIV	568951	568952	-	0	207	14443	0	1	1	SITE0742	CLUST144
chrIV	568952	568953	-	0	3193	0	0	1	0	SITE0743	CLUST144
chrIV	620050	620051	+	6580	0	0	1	0	0	SITE0749	CLUST145
chrIV	620052	620053	-	0	890	0	0	1	0	SITE0751	CLUST145
chrIV	620053	620054	+	15570	8627	16643	2	2	2	SITE0752	CLUST145
chrIV	620054	620055	+	35226	21090	30205	4	10	6	SITE0753	CLUST145
chrIV	620055	620056	+	20766	22993	48876	5	6	10	SITE0754	CLUST145
chrIV	620056	620057	-	197	6648	967	1	1	2	SITE0757	CLUST145
chrIV	620057	620058	-	7998	5560	22797	5	4	4	SITE0758	CLUST145
chrIV	620058	620059	-	1622	5611	9976	2	2	4	SITE0759	CLUST145
chrIV	635711	635712	+	0	0	0	0	0	0	SITE0760	CLUST146
chrIV	645237	645238	-	212	1498	2723	1	1	2	SITE0766	CLUST147
chrIV	645238	645239	-	39639	22357	16695	8	8	6	SITE0767	CLUST147
chrIV	645239	645240	-	15448	33251	5351	3	6	4	SITE0768	CLUST147
chrIV	645240	645241	-	10758	8119	7592	3	3	4	SITE0769	CLUST147
chrIV	657037	657038	+	0	0	0	0	0	0	SITE0780	CLUST148
chrIV	668080	668081	-	0	2850	0	0	1	0	SITE0781	CLUST149
chrIV	668089	668090	+	14455	5663	0	1	2	0	SITE0782	CLUST149
chrIV	668090	668091	+	0	0	0	0	0	0	SITE0783	CLUST149
chrIV	668091	668092	+	7961	3707	21380	4	3	7	SITE0784	CLUST149
chrIV	668092	668093	+	5606	32293	14393	4	11	11	SITE0785	CLUST149
chrIV	668093	668094	+	0	0	2683	0	0	1	SITE0786	CLUST149
chrIV	668094	668095	-	17792	15535	12909	4	4	6	SITE0790	CLUST149
chrIV	668095	668096	-	16353	27813	17083	8	10	7	SITE0791	CLUST149
chrIV	668100	668101	+	0	0	0	0	0	0	SITE0793	CLUST149
chrIV	668437	668438	+	0	0	0	0	0	0	SITE0795	CLUST150
chrIV	685018	685019	+	0	0	0	0	0	0	SITE0797	CLUST151
chrIV	719100	719101	-	0	0	0	0	0	0	SITE0800	CLUST152
chrIV	722525	722526	-	79	0	0	1	0	0	SITE0802	CLUST153
chrIV	725357	725358	+	0	0	0	0	0	0	SITE0803	CLUST154
chrIV	727884	727885	-	0	0	0	0	0	0	SITE0804	CLUST155
chrIV	751026	751027	-	0	0	0	0	0	0	SITE0805	CLUST156
chrIV	763089	763090	+	0	0	0	0	0	0	SITE0806	CLUST157
chrIV	781421	781422	+	0	0	0	0	0	0	SITE0810	CLUST158
chrIV	784593	784594	-	0	0	0	0	0	0	SITE0811	CLUST159
chrIV	787472	787473	-	0	0	0	0	0	0	SITE0812	CLUST160
chrIV	802811	802812	+	0	0	219	0	0	1	SITE0813	CLUST161
chrIV	802814	802815	+	5820	21761	28846	9	11	19	SITE0816	CLUST161
chrIV	802815	802816	+	0	0	0	0	0	0	SITE0817	CLUST161
chrIV	802815	802816	-	0	68	0	0	1	0	SITE0818	CLUST161
chrIV	802817	802818	-	17676	39749	57422	8	22	15	SITE0820	CLUST161
chrIV	802818	802819	-	0	1475	0	0	2	0	SITE0821	CLUST161
chrIV	810042	810043	+	0	0	0	0	0	0	SITE0823	CLUST162
chrIV	814108	814109	+	0	0	0	0	0	0	SITE0824	CLUST163
chrIV	829321	829322	-	0	0	0	0	0	0	SITE0828	CLUST164
chrIV	847912	847913	-	0	0	0	0	0	0	SITE0830	CLUST165
chrIV	868021	868022	-	0	2388	0	0	1	0	SITE0832	CLUST166
chrIV	884348	884349	+	0	0	14126	0	0	2	SITE0835	CLUST167
chrIV	884349	884350	+	1894	19852	61024	1	6	10	SITE0836	CLUST167
chrIV	884350	884351	+	7081	0	4141	2	0	1	SITE0837	CLUST167
chrIV	884351	884352	-	167	1085	0	1	1	0	SITE0839	CLUST167
chrIV	884352	884353	-	6962	9194	4285	3	6	4	SITE0840	CLUST167
chrIV	884353	884354	-	398	2034	4279	1	2	1	SITE0841	CLUST167
chrIV	908058	908059	-	0	0	0	0	0	0	SITE0843	CLUST168
chrIV	945953	945954	-	0	257	0	0	1	0	SITE0845	CLUST169
chrIV	946295	946296	+	31153	30044	68016	6	11	12	SITE0851	CLUST170
chrIV	946296	946297	+	0	0	5349	0	0	1	SITE0852	CLUST170
chrIV	946297	946298	+	26008	30124	90729	4	9	21	SITE0853	CLUST170
chrIV	946299	946300	+	0	0	0	0	0	0	SITE0856	CLUST170
chrIV	946298	946299	-	44547	17228	80984	3	9	6	SITE0857	CLUST170
chrIV	946300	946301	-	38566	85175	32225	10	13	6	SITE0859	CLUST170
chrIV	946301	946302	-	0	0	12733	0	0	1	SITE0860	CLUST170
chrIV	946302	946303	-	9212	0	0	1	0	0	SITE0861	CLUST170
chrIV	946457	946458	-	0	0	0	0	0	0	SITE0863	CLUST171
chrIV	954167	954168	+	0	0	61	0	0	1	SITE0864	CLUST172
chrIV	981064	981065	+	302	0	0	2	0	0	SITE0868	CLUST173
chrIV	981066	981067	+	0	13214	9036	0	4	2	SITE0869	CLUST173
chrIV	981067	981068	+	19716	0	0	1	0	0	SITE0870	CLUST173
chrIV	981067	981068	-	1480	1338	0	1	1	0	SITE0872	CLUST173
chrIV	981069	981070	+	419	0	70	2	0	1	SITE0873	CLUST173
chrIV	981069	981070	-	4484	9322	1718	1	3	1	SITE0875	CLUST173
chrIV	981070	981071	-	6852	0	0	1	0	0	SITE0876	CLUST173
chrIV	981072	981073	+	0	0	0	0	0	0	SITE0878	CLUST173
chrIV	981072	981073	-	0	0	17350	0	0	3	SITE0879	CLUST173
chrIV	981077	981078	+	0	0	911	0	0	1	SITE0880	CLUST173
chrIV	992814	992815	+	0	13876	16382	0	4	2	SITE0884	CLUST174
chrIV	992816	992817	+	27031	40581	37373	8	11	7	SITE0886	CLUST174
chrIV	992817	992818	+	0	0	3581	0	0	1	SITE0888	CLUST174
chrIV	992817	992818	-	949	485	18575	1	1	4	SITE0889	CLUST174
chrIV	992818	992819	-	170	0	0	1	0	0	SITE0891	CLUST174
chrIV	992819	992820	-	43746	101558	38179	8	21	10	SITE0893	CLUST174
chrIV	992821	992822	+	50763	0	0	2	0	0	SITE0894	CLUST174
chrIV	992821	992822	-	0	767	0	0	1	0	SITE0896	CLUST174
chrIV	1013642	1013643	-	0	0	0	0	0	0	SITE0899	CLUST175
chrIV	1016438	1016439	+	0	0	0	0	0	0	SITE0900	CLUST176
chrIV	1017290	1017291	+	0	0	9994	0	0	1	SITE0904	CLUST177
chrIV	1017291	1017292	+	139332	34409	89008	23	17	19	SITE0906	CLUST177
chrIV	1017292	1017293	+	840	7501	14989	1	5	3	SITE0907	CLUST177
chrIV	1017293	1017294	+	773	8060	0	1	3	0	SITE0908	CLUST177
chrIV	1017294	1017295	-	94835	36135	107967	17	16	23	SITE0911	CLUST177
chrIV	1017295	1017296	-	5384	0	28945	1	0	3	SITE0912	CLUST177
chrIV	1017296	1017297	-	0	0	0	0	0	0	SITE0913	CLUST177
chrIV	1017298	1017299	-	0	7921	0	0	2	0	SITE0914	CLUST177
chrIV	1019127	1019128	-	0	0	0	0	0	0	SITE0918	CLUST178
chrIV	1023133	1023134	+	0	421	0	0	3	0	SITE0921	CLUST179
chrIV	1075547	1075548	+	0	0	333	0	0	1	SITE0931	CLUST180
chrIV	1075555	1075556	+	50849	37502	61861	12	10	11	SITE0933	CLUST180
chrIV	1075556	1075557	+	30254	16661	35800	4	7	6	SITE0934	CLUST180
chrIV	1075557	1075558	+	111423	62998	68237	19	18	15	SITE0935	CLUST180
chrIV	1075558	1075559	+	0	0	357	0	0	1	SITE0938	CLUST180
chrIV	1075558	1075559	-	34883	31569	36373	6	9	11	SITE0939	CLUST180
chrIV	1075559	1075560	-	14907	14610	33068	5	5	10	SITE0941	CLUST180
chrIV	1075560	1075561	-	22687	89073	107525	9	17	13	SITE0942	CLUST180
chrIV	1075561	1075562	-	15519	0	0	1	0	0	SITE0943	CLUST180
chrIV	1089424	1089425	-	0	0	0	0	0	0	SITE0945	CLUST181
chrIV	1093602	1093603	+	0	0	0	0	0	0	SITE0946	CLUST182
chrIV	1095472	1095473	+	0	0	1644	0	0	2	SITE0948	CLUST183
chrIV	1095474	1095475	+	33513	104614	168429	22	47	51	SITE0950	CLUST183
chrIV	1095474	1095475	-	492	0	0	1	0	0	SITE0952	CLUST183
chrIV	1095475	1095476	-	0	0	0	0	0	0	SITE0953	CLUST183
chrIV	1095477	1095478	-	56565	108959	211536	18	31	41	SITE0955	CLUST183
chrIV	1095479	1095480	+	0	0	0	0	0	0	SITE0957	CLUST183
chrIV	1103275	1103276	-	0	0	0	0	0	0	SITE0960	CLUST184
chrIV	1111231	1111232	+	0	0	0	0	0	0	SITE0961	CLUST185
chrIV	1124931	1124932	-	0	0	0	0	0	0	SITE0963	CLUST186
chrIV	1135550	1135551	-	385	0	0	1	0	0	SITE0964	CLUST187
chrIV	1148631	1148632	-	0	0	0	0	0	0	SITE0965	CLUST188
chrIV	1150949	1150950	+	0	8701	2856	0	2	3	SITE0966	CLUST189
chrIV	1150952	1150953	+	2354	1182	0	1	2	0	SITE0968	CLUST189
chrIV	1150952	1150953	-	3111	4517	12747	1	1	1	SITE0970	CLUST189
chrIV	1150953	1150954	+	30668	29155	48000	9	10	11	SITE0971	CLUST189
chrIV	1150954	1150955	+	3052	0	0	2	0	0	SITE0972	CLUST189
chrIV	1150955	1150956	+	51	10005	11203	1	3	2	SITE0973	CLUST189
chrIV	1150955	1150956	-	2292	0	0	1	0	0	SITE0974	CLUST189
chrIV	1150956	1150957	-	14841	24364	38719	7	10	6	SITE0976	CLUST189
chrIV	1150957	1150958	-	0	2240	3309	0	1	1	SITE0977	CLUST189
chrIV	1150958	1150959	-	2799	12781	23583	4	3	2	SITE0978	CLUST189
chrIV	1151385	1151386	+	0	0	9538	0	0	1	SITE0979	CLUST190
chrIV	1175811	1175812	+	0	0	0	0	0	0	SITE0987	CLUST191
chrIV	1175813	1175814	+	14152	11498	10607	6	8	3	SITE0989	CLUST191
chrIV	1175814	1175815	+	0	0	779	0	0	1	SITE0990	CLUST191
chrIV	1175814	1175815	-	229	0	0	1	0	0	SITE0991	CLUST191
chrIV	1175815	1175816	+	0	0	0	0	0	0	SITE0992	CLUST191
chrIV	1175816	1175817	-	36926	99067	177024	8	23	23	SITE0994	CLUST191
chrIV	1175817	1175818	+	147	2667	460	1	1	1	SITE0995	CLUST191
chrIV	1175817	1175818	-	0	2443	10778	0	2	1	SITE0996	CLUST191
chrIV	1175818	1175819	-	4003	0	0	1	0	0	SITE0997	CLUST191
chrIV	1177320	1177321	-	0	0	0	0	0	0	SITE0999	CLUST192
chrIV	1199160	1199161	+	0	0	0	0	0	0	SITE1003	CLUST193
chrIV	1201733	1201734	+	0	13815	11913	0	2	2	SITE1006	CLUST194
chrIV	1201734	1201735	+	4186	19906	28755	4	9	7	SITE1007	CLUST194
chrIV	1201736	1201737	-	0	1889	723	0	1	1	SITE1010	CLUST194
chrIV	1201737	1201738	-	25378	42191	84385	7	13	15	SITE1012	CLUST194
chrIV	1201933	1201934	+	110	0	0	1	0	0	SITE1016	CLUST195
chrIV	1233979	1233980	+	0	0	984	0	0	1	SITE1018	CLUST196
chrIV	1242966	1242967	+	0	0	1140	0	0	1	SITE1021	CLUST197
chrIV	1257090	1257091	+	19594	11736	6923	1	4	1	SITE1027	CLUST198
chrIV	1257091	1257092	+	2994	2880	2419	1	1	2	SITE1028	CLUST198
chrIV	1257092	1257093	+	80400	86209	204787	25	39	45	SITE1029	CLUST198
chrIV	1257093	1257094	-	1607	13411	16551	3	4	3	SITE1033	CLUST198
chrIV	1257094	1257095	-	21427	28926	23536	7	7	9	SITE1034	CLUST198
chrIV	1257095	1257096	-	144060	99817	126486	31	34	35	SITE1035	CLUST198
chrIV	1263735	1263736	+	0	0	0	0	0	0	SITE1039	CLUST199
chrIV	1281580	1281581	-	0	0	0	0	0	0	SITE1042	CLUST200
chrIV	1285409	1285410	-	0	0	0	0	0	0	SITE1043	CLUST201
chrIV	1292418	1292419	+	0	0	197	0	0	1	SITE1044	CLUST202
chrIV	1305611	1305612	+	0	676	0	0	1	0	SITE1049	CLUST203
chrIV	1305612	1305613	+	0	9816	4074	0	1	1	SITE1050	CLUST203
chrIV	1305613	1305614	+	0	0	233	0	0	1	SITE1051	CLUST203
chrIV	1305613	1305614	-	0	0	5832	0	0	1	SITE1052	CLUST203
chrIV	1305614	1305615	+	2005	25820	27987	4	14	13	SITE1053	CLUST203
chrIV	1305615	1305616	+	0	1170	2214	0	1	2	SITE1054	CLUST203
chrIV	1305615	1305616	-	0	12786	12974	0	2	2	SITE1056	CLUST203
chrIV	1305616	1305617	-	0	2170	6465	0	3	4	SITE1058	CLUST203
chrIV	1305617	1305618	-	19417	10394	98726	8	5	18	SITE1059	CLUST203
chrIV	1305618	1305619	-	275	1883	17600	1	1	1	SITE1061	CLUST203
chrIV	1305620	1305621	-	7284	0	0	1	0	0	SITE1063	CLUST203
chrIV	1307120	1307121	-	0	0	0	0	0	0	SITE1064	CLUST204
chrIV	1331487	1331488	+	0	1961	0	0	1	0	SITE1065	CLUST205
chrIV	1352547	1352548	+	1109	8332	13828	1	2	2	SITE1070	CLUST206
chrIV	1352548	1352549	+	260	0	0	1	0	0	SITE1071	CLUST206
chrIV	1352549	1352550	+	1732	22496	4217	4	8	5	SITE1072	CLUST206
chrIV	1352550	1352551	-	18534	136	0	2	1	0	SITE1075	CLUST206
chrIV	1352551	1352552	-	0	7352	11653	0	3	2	SITE1076	CLUST206
chrIV	1352552	1352553	-	25930	28023	56786	5	12	11	SITE1077	CLUST206
chrIV	1366899	1366900	+	0	0	0	0	0	0	SITE1083	CLUST207
chrIV	1391696	1391697	-	0	0	0	0	0	0	SITE1088	CLUST208
chrIV	1404311	1404312	+	0	19976	0	0	1	0	SITE1090	CLUST209
chrIV	1422015	1422016	+	0	0	0	0	0	0	SITE1093	CLUST210
chrIV	1448724	1448725	-	0	0	0	0	0	0	SITE1098	CLUST211
chrIV	1461625	1461626	-	0	0	0	0	0	0	SITE1099	CLUST212
chrIV	1461841	1461842	+	2518	1648	12371	2	1	2	SITE1101	CLUST213
chrIV	1461842	1461843	+	0	0	2212	0	0	1	SITE1102	CLUST213
chrIV	1461842	1461843	-	0	0	0	0	0	0	SITE1105	CLUST213
chrIV	1461844	1461845	-	171	0	15253	1	0	3	SITE1107	CLUST213
chrIV	1461845	1461846	-	0	0	4046	0	0	1	SITE1108	CLUST213
chrIV	1482447	1482448	-	0	0	0	0	0	0	SITE1109	CLUST214
chrIV	1511070	1511071	-	0	0	0	0	0	0	SITE1116	CLUST215
chrIV	1513191	1513192	-	0	0	0	0	0	0	SITE1118	CLUST216
chrIV	1513362	1513363	+	0	0	0	0	0	0	SITE1119	CLUST217
chrV	19665	19666	+	0	0	0	0	0	0	SITE1124	CLUST218
chrV	20884	20885	+	0	0	0	0	0	0	SITE1125	CLUST219
chrV	26116	26117	+	0	0	0	0	0	0	SITE1126	CLUST220
chrV	43169	43170	+	0	0	194	0	0	1	SITE1128	CLUST221
chrV	53279	53280	-	0	0	0	0	0	0	SITE1129	CLUST222
chrV	61964	61965	+	0	7766	0	0	1	0	SITE1130	CLUST223
chrV	61969	61970	+	0	1314	0	0	1	0	SITE1133	CLUST223
chrV	61973	61974	+	70334	66594	144074	24	27	27	SITE1135	CLUST223
chrV	61975	61976	+	0	0	1308	0	0	1	SITE1139	CLUST223
chrV	61976	61977	-	70377	66861	76634	18	25	22	SITE1143	CLUST223
chrV	61978	61979	-	6232	2129	711	1	2	1	SITE1145	CLUST223
chrV	62888	62889	-	0	0	0	0	0	0	SITE1148	CLUST224
chrV	86586	86587	+	0	4345	0	0	1	0	SITE1152	CLUST225
chrV	86587	86588	+	38015	5762	2306	3	2	1	SITE1153	CLUST225
chrV	86588	86589	+	36617	64003	68305	13	15	18	SITE1154	CLUST225
chrV	86589	86590	+	0	10391	9319	0	4	2	SITE1155	CLUST225
chrV	86590	86591	-	0	123	5047	0	1	3	SITE1157	CLUST225
chrV	86591	86592	-	32770	37897	34102	8	15	13	SITE1158	CLUST225
chrV	86592	86593	-	23495	21040	13469	5	8	5	SITE1159	CLUST225
chrV	86594	86595	+	0	0	57	0	0	1	SITE1160	CLUST225
chrV	86595	86596	-	0	9937	0	0	1	0	SITE1162	CLUST225
chrV	86597	86598	-	0	0	6186	0	0	1	SITE1164	CLUST225
chrV	93165	93166	-	0	0	219	0	0	1	SITE1169	CLUST226
chrV	100116	100117	+	33510	56	0	4	1	0	SITE1171	CLUST227
chrV	100117	100118	+	91282	48584	119180	16	21	24	SITE1172	CLUST227
chrV	100118	100119	+	56187	40486	46836	6	11	13	SITE1173	CLUST227
chrV	100119	100120	+	175	0	265	1	0	1	SITE1174	CLUST227
chrV	100119	100120	-	0	430	0	0	1	0	SITE1176	CLUST227
chrV	100120	100121	-	97482	102672	153599	20	20	28	SITE1178	CLUST227
chrV	100121	100122	-	59711	74025	46350	9	11	9	SITE1179	CLUST227
chrV	100122	100123	-	227	0	0	1	0	0	SITE1180	CLUST227
chrV	106337	106338	-	0	0	0	0	0	0	SITE1185	CLUST228
chrV	118118	118119	+	0	1730	91	0	1	1	SITE1188	CLUST229
chrV	118119	118120	+	73635	72533	138637	18	12	24	SITE1189	CLUST229
chrV	118121	118122	-	0	9160	0	0	1	0	SITE1192	CLUST229
chrV	118122	118123	-	119747	119545	78306	18	20	14	SITE1193	CLUST229
chrV	118143	118144	-	0	0	145	0	0	1	SITE1194	CLUST229
chrV	118917	118918	+	0	0	0	0	0	0	SITE1195	CLUST230
chrV	120174	120175	+	0	0	0	0	0	0	SITE1197	CLUST231
chrV	131163	131164	+	540	2815	5560	1	2	2	SITE1199	CLUST232
chrV	131165	131166	+	142806	84298	123696	20	26	18	SITE1202	CLUST232
chrV	131165	131166	-	0	5990	0	0	1	0	SITE1205	CLUST232
chrV	131166	131167	-	894	0	0	2	0	0	SITE1206	CLUST232
chrV	131168	131169	-	118746	76425	101136	23	21	16	SITE1208	CLUST232
chrV	135509	135510	+	6418	54495	52739	9	25	21	SITE1212	CLUST233
chrV	135510	135511	-	8781	0	0	1	0	0	SITE1215	CLUST233
chrV	135512	135513	-	42224	26238	76872	18	20	24	SITE1217	CLUST233
chrV	138650	138651	+	96458	49039	133176	15	14	19	SITE1222	CLUST234
chrV	138651	138652	+	5079	1982	0	2	1	0	SITE1223	CLUST234
chrV	138652	138653	-	0	0	70	0	0	1	SITE1226	CLUST234
chrV	138653	138654	-	65300	55528	78004	12	18	22	SITE1227	CLUST234
chrV	138654	138655	-	0	15027	1822	0	3	2	SITE1228	CLUST234
chrV	141427	141428	-	0	0	0	0	0	0	SITE1230	CLUST235
chrV	150677	150678	-	0	0	0	0	0	0	SITE1231	CLUST236
chrV	151931	151932	-	0	0	0	0	0	0	SITE1232	CLUST237
chrV	152968	152969	+	0	0	0	0	0	0	SITE1233	CLUST238
chrV	177071	177072	-	0	0	11592	0	0	1	SITE1237	CLUST239
chrV	177082	177083	+	8008	0	335	1	0	1	SITE1238	CLUST239
chrV	177083	177084	+	5575	10181	40134	3	5	7	SITE1239	CLUST239
chrV	177084	177085	+	0	16716	10276	0	4	2	SITE1240	CLUST239
chrV	177083	177084	-	0	0	0	0	0	0	SITE1241	CLUST239
chrV	177084	177085	-	0	3595	0	0	1	0	SITE1242	CLUST239
chrV	177085	177086	-	0	0	4412	0	0	4	SITE1244	CLUST239
chrV	177086	177087	+	415	0	87	1	0	1	SITE1245	CLUST239
chrV	177086	177087	-	27241	9091	5096	5	2	2	SITE1246	CLUST239
chrV	177087	177088	-	332	8515	5168	2	3	2	SITE1247	CLUST239
chrV	177089	177090	-	0	126	0	0	1	0	SITE1248	CLUST239
chrV	177090	177091	-	0	0	1404	0	0	1	SITE1249	CLUST239
chrV	190923	190924	+	0	0	0	0	0	0	SITE1250	CLUST240
chrV	207341	207342	+	39615	51420	54723	11	13	10	SITE1255	CLUST241
chrV	207342	207343	+	0	1387	854	0	1	1	SITE1256	CLUST241
chrV	207343	207344	+	1682	29652	14162	8	12	5	SITE1257	CLUST241
chrV	207344	207345	+	0	1032	0	0	1	0	SITE1258	CLUST241
chrV	207345	207346	+	22417	31543	19757	4	5	3	SITE1260	CLUST241
chrV	207344	207345	-	656	15808	16319	2	7	7	SITE1261	CLUST241
chrV	207345	207346	-	0	0	1207	0	0	1	SITE1262	CLUST241
chrV	207346	207347	+	0	0	0	0	0	0	SITE1263	CLUST241
chrV	207346	207347	-	63494	21106	57760	5	9	12	SITE1264	CLUST241
chrV	207347	207348	+	0	0	0	0	0	0	SITE1265	CLUST241
chrV	207348	207349	-	1668	3060	33263	2	2	5	SITE1268	CLUST241
chrV	207349	207350	-	0	0	720	0	0	1	SITE1270	CLUST241
chrV	238121	238122	+	123	0	0	1	0	0	SITE1273	CLUST242
chrV	238470	238471	-	0	1678	0	0	1	0	SITE1274	CLUST243
chrV	249928	249929	-	0	0	0	0	0	0	SITE1275	CLUST244
chrV	250270	250271	+	18414	33028	61320	1	9	10	SITE1283	CLUST245
chrV	250271	250272	+	0	1206	19642	0	1	7	SITE1284	CLUST245
chrV	250272	250273	+	780	551	10201	2	1	4	SITE1285	CLUST245
chrV	250271	250272	-	0	66	0	0	1	0	SITE1286	CLUST245
chrV	250272	250273	-	0	0	0	0	0	0	SITE1287	CLUST245
chrV	250273	250274	-	8545	4503	54326	7	5	14	SITE1289	CLUST245
chrV	250274	250275	+	0	228	0	0	1	0	SITE1290	CLUST245
chrV	250274	250275	-	21838	117	15183	3	1	4	SITE1291	CLUST245
chrV	250275	250276	-	336	17602	7722	2	4	4	SITE1292	CLUST245
chrV	255605	255606	+	0	0	0	0	0	0	SITE1298	CLUST246
chrV	266547	266548	-	0	0	0	0	0	0	SITE1305	CLUST247
chrV	267314	267315	-	0	0	0	0	0	0	SITE1306	CLUST248
chrV	280698	280699	-	0	0	0	0	0	0	SITE1307	CLUST249
chrV	288521	288522	-	0	2318	0	0	1	0	SITE1308	CLUST250
chrV	288531	288532	+	0	776	0	0	1	0	SITE1311	CLUST250
chrV	288532	288533	+	6699	16327	65873	4	7	9	SITE1312	CLUST250
chrV	288532	288533	-	0	0	0	0	0	0	SITE1314	CLUST250
chrV	288534	288535	+	384	115	96	2	1	1	SITE1316	CLUST250
chrV	288535	288536	+	0	0	6478	0	0	1	SITE1317	CLUST250
chrV	288536	288537	+	22963	21620	17208	5	5	3	SITE1319	CLUST250
chrV	288535	288536	-	77945	16965	17966	7	2	7	SITE1320	CLUST250
chrV	288537	288538	-	0	62	16696	0	1	1	SITE1323	CLUST250
chrV	288539	288540	+	247	0	886	1	0	1	SITE1325	CLUST250
chrV	288538	288539	-	0	0	0	0	0	0	SITE1326	CLUST250
chrV	288539	288540	-	185	6667	15062	1	3	3	SITE1327	CLUST250
chrV	288545	288546	+	0	0	0	0	0	0	SITE1331	CLUST250
chrV	309817	309818	-	0	0	0	0	0	0	SITE1336	CLUST251
chrV	312105	312106	+	26324	33771	7869	7	5	3	SITE1341	CLUST252
chrV	312106	312107	+	0	6058	17945	0	2	1	SITE1342	CLUST252
chrV	312107	312108	+	720	8021	12133	1	3	2	SITE1344	CLUST252
chrV	312107	312108	-	15422	0	0	1	0	0	SITE1346	CLUST252
chrV	312108	312109	+	86093	50507	109814	15	17	19	SITE1347	CLUST252
chrV	312108	312109	-	27046	19422	49026	6	9	10	SITE1349	CLUST252
chrV	312109	312110	-	14719	0	0	2	0	0	SITE1350	CLUST252
chrV	312110	312111	-	29877	0	1360	2	0	1	SITE1351	CLUST252
chrV	312111	312112	-	92275	57623	87242	11	12	15	SITE1352	CLUST252
chrV	312114	312115	-	0	0	4266	0	0	1	SITE1355	CLUST252
chrV	333736	333737	+	0	0	0	0	0	0	SITE1358	CLUST253
chrV	338875	338876	+	0	0	0	0	0	0	SITE1359	CLUST254
chrV	354916	354917	+	0	252	0	0	1	0	SITE1362	CLUST255
chrV	354917	354918	+	6601	42882	76302	4	10	12	SITE1364	CLUST255
chrV	354918	354919	+	1298	4743	31183	3	2	5	SITE1365	CLUST255
chrV	354919	354920	+	0	1044	0	0	1	0	SITE1366	CLUST255
chrV	354918	354919	-	569	8814	0	1	1	0	SITE1367	CLUST255
chrV	354919	354920	-	0	0	0	0	0	0	SITE1368	CLUST255
chrV	354920	354921	-	16177	47312	100222	10	16	20	SITE1370	CLUST255
chrV	354921	354922	-	0	3260	4260	0	1	1	SITE1371	CLUST255
chrV	354926	354927	+	174	0	0	1	0	0	SITE1374	CLUST255
chrV	355750	355751	+	1072	0	0	1	0	0	SITE1375	CLUST256
chrV	372623	372624	-	0	0	0	0	0	0	SITE1377	CLUST257
chrV	377648	377649	-	0	0	0	0	0	0	SITE1379	CLUST258
chrV	382417	382418	-	0	0	144	0	0	1	SITE1380	CLUST259
chrV	391008	391009	-	0	0	0	0	0	0	SITE1381	CLUST260
chrV	431377	431378	+	785	0	0	1	0	0	SITE1384	CLUST261
chrV	431378	431379	+	37636	54908	87817	12	25	23	SITE1385	CLUST261
chrV	431379	431380	+	0	2122	6192	0	1	2	SITE1386	CLUST261
chrV	431380	431381	+	230	8259	0	1	1	0	SITE1387	CLUST261
chrV	431380	431381	-	0	81	0	0	1	0	SITE1388	CLUST261
chrV	431381	431382	-	65931	88535	142813	10	26	22	SITE1389	CLUST261
chrV	431382	431383	+	0	0	0	0	0	0	SITE1390	CLUST261
chrV	431382	431383	-	0	0	0	0	0	0	SITE1391	CLUST261
chrV	431383	431384	-	30929	0	0	5	0	0	SITE1392	CLUST261
chrV	434625	434626	-	2103	0	0	1	0	0	SITE1402	CLUST262
chrV	434626	434627	-	14557	33631	13889	6	9	6	SITE1403	CLUST262
chrV	434627	434628	-	18951	47252	36429	4	9	9	SITE1404	CLUST262
chrV	434628	434629	-	0	24077	0	0	3	0	SITE1405	CLUST262
chrV	434629	434630	-	11039	18603	33238	6	9	5	SITE1406	CLUST262
chrV	435835	435836	+	4573	47561	36555	6	15	10	SITE1422	CLUST263
chrV	435837	435838	+	0	0	13701	0	0	3	SITE1426	CLUST263
chrV	435838	435839	-	17821	44356	23785	10	15	9	SITE1429	CLUST263
chrV	435840	435841	-	0	916	16800	0	1	4	SITE1431	CLUST263
chrV	437403	437404	+	0	0	0	0	0	0	SITE1434	CLUST264
chrV	438685	438686	+	1183	3695	21760	2	1	3	SITE1438	CLUST265
chrV	438686	438687	+	44549	46817	178234	9	19	22	SITE1439	CLUST265
chrV	438688	438689	-	1029	5493	11480	2	2	2	SITE1443	CLUST265
chrV	438689	438690	-	74264	43152	50177	12	17	16	SITE1444	CLUST265
chrV	440676	440677	-	0	0	0	0	0	0	SITE1447	CLUST266
chrV	441981	441982	+	68	1260	40332	1	1	6	SITE1451	CLUST267
chrV	441982	441983	+	18867	18890	85804	10	6	16	SITE1452	CLUST267
chrV	441984	441985	-	3254	12270	20989	2	6	5	SITE1455	CLUST267
chrV	441985	441986	-	9372	52978	73300	5	13	20	SITE1456	CLUST267
chrV	443286	443287	+	247	5236	1402	1	3	1	SITE1458	CLUST268
chrV	443287	443288	+	18998	16934	13806	9	14	7	SITE1459	CLUST268
chrV	443288	443289	+	0	2525	0	0	1	0	SITE1460	CLUST268
chrV	443287	443288	-	0	4787	0	0	1	0	SITE1461	CLUST268
chrV	443288	443289	-	0	0	10838	0	0	2	SITE1462	CLUST268
chrV	443289	443290	-	0	11933	709	0	6	2	SITE1465	CLUST268
chrV	443290	443291	-	71668	31928	30494	8	11	8	SITE1466	CLUST268
chrV	443291	443292	-	0	3707	0	0	1	0	SITE1467	CLUST268
chrV	451516	451517	-	0	0	0	0	0	0	SITE1468	CLUST269
chrV	452070	452071	+	0	0	0	0	0	0	SITE1469	CLUST270
chrV	457923	457924	-	0	0	0	0	0	0	SITE1471	CLUST271
chrV	461558	461559	+	0	0	0	0	0	0	SITE1473	CLUST272
chrV	467076	467077	-	0	0	0	0	0	0	SITE1474	CLUST273
chrV	468094	468095	-	0	0	0	0	0	0	SITE1475	CLUST274
chrV	469441	469442	+	105342	80216	75932	19	18	21	SITE1478	CLUST275
chrV	469443	469444	+	0	3447	0	0	1	0	SITE1481	CLUST275
chrV	469443	469444	-	333	0	0	1	0	0	SITE1482	CLUST275
chrV	469444	469445	+	0	7301	0	0	1	0	SITE1483	CLUST275
chrV	469444	469445	-	109579	98959	82941	21	26	17	SITE1484	CLUST275
chrV	469445	469446	+	6327	0	0	1	0	0	SITE1485	CLUST275
chrV	469445	469446	-	0	7202	1575	0	2	1	SITE1486	CLUST275
chrV	469446	469447	-	0	0	1140	0	0	1	SITE1488	CLUST275
chrV	469448	469449	-	0	0	0	0	0	0	SITE1490	CLUST275
chrV	487413	487414	+	80	0	0	1	0	0	SITE1492	CLUST276
chrV	487414	487415	+	23856	38673	8386	4	10	3	SITE1494	CLUST276
chrV	487415	487416	+	68	0	0	1	0	0	SITE1495	CLUST276
chrV	487416	487417	-	27563	0	0	1	0	0	SITE1498	CLUST276
chrV	487417	487418	-	6735	3925	26623	2	3	2	SITE1499	CLUST276
chrV	487418	487419	-	6594	0	0	1	0	0	SITE1500	CLUST276
chrV	492435	492436	-	0	0	5354	0	0	1	SITE1505	CLUST277
chrV	492437	492438	-	1492	4152	27907	2	3	6	SITE1506	CLUST277
chrV	492438	492439	-	0	0	8624	0	0	1	SITE1507	CLUST277
chrV	492439	492440	-	68546	79165	187545	22	23	37	SITE1508	CLUST277
chrV	492440	492441	-	0	1677	5907	0	1	1	SITE1509	CLUST277
chrV	492441	492442	-	0	0	4783	0	0	1	SITE1510	CLUST277
chrV	500084	500085	-	0	0	763	0	0	1	SITE1517	CLUST278
chrV	504220	504221	-	0	0	0	0	0	0	SITE1518	CLUST279
chrV	518236	518237	+	0	0	0	0	0	0	SITE1519	CLUST280
chrV	540953	540954	+	0	0	0	0	0	0	SITE1520	CLUST281
chrV	545395	545396	+	0	0	0	0	0	0	SITE1521	CLUST282
chrV	551369	551370	+	4517	12505	20504	2	4	2	SITE1524	CLUST283
chrV	551370	551371	+	58157	50157	25024	8	10	10	SITE1525	CLUST283
chrV	551370	551371	-	67	3673	0	1	1	0	SITE1526	CLUST283
chrV	551371	551372	-	0	0	9047	0	0	1	SITE1528	CLUST283
chrV	551372	551373	-	36046	17407	7049	3	4	2	SITE1529	CLUST283
chrV	551373	551374	-	1041	43118	53291	4	13	7	SITE1530	CLUST283
chrV	551375	551376	-	300	0	0	1	0	0	SITE1532	CLUST283
chrV	558703	558704	-	0	0	0	0	0	0	SITE1538	CLUST284
chrV	565392	565393	-	0	0	0	0	0	0	SITE1541	CLUST285
chrVI	4381	4382	+	80	0	0	1	0	0	SITE1545	CLUST286
chrVI	28724	28725	+	0	0	0	0	0	0	SITE1547	CLUST287
chrVI	43198	43199	-	0	0	0	0	0	0	SITE1548	CLUST288
chrVI	51915	51916	-	0	0	0	0	0	0	SITE1549	CLUST289
chrVI	58479	58480	+	0	0	690	0	0	1	SITE1551	CLUST290
chrVI	65227	65228	-	0	0	12333	0	0	1	SITE1553	CLUST291
chrVI	65369	65370	+	0	0	0	0	0	0	SITE1554	CLUST292
chrVI	85641	85642	-	0	0	0	0	0	0	SITE1556	CLUST293
chrVI	88019	88020	-	0	0	0	0	0	0	SITE1558	CLUST294
chrVI	101358	101359	+	3176	6235	1773	1	4	1	SITE1560	CLUST295
chrVI	101360	101361	+	37755	79101	152573	15	27	32	SITE1562	CLUST295
chrVI	101361	101362	-	12423	0	0	1	0	0	SITE1564	CLUST295
chrVI	101363	101364	-	49271	70391	46336	24	21	17	SITE1568	CLUST295
chrVI	107256	107257	+	0	0	0	0	0	0	SITE1572	CLUST296
chrVI	136146	136147	-	0	0	0	0	0	0	SITE1575	CLUST297
chrVI	137570	137571	+	0	1219	0	0	1	0	SITE1577	CLUST298
chrVI	137571	137572	+	4013	64385	36435	6	13	10	SITE1578	CLUST298
chrVI	137572	137573	+	0	17120	19372	0	4	1	SITE1580	CLUST298
chrVI	137573	137574	+	0	0	34905	0	0	3	SITE1582	CLUST298
chrVI	137572	137573	-	0	0	0	0	0	0	SITE1583	CLUST298
chrVI	137574	137575	-	7155	4114	22658	7	3	6	SITE1586	CLUST298
chrVI	137575	137576	-	0	0	4823	0	0	1	SITE1587	CLUST298
chrVI	137576	137577	-	4866	0	469	1	0	1	SITE1588	CLUST298
chrVI	137577	137578	+	0	0	428	0	0	1	SITE1589	CLUST298
chrVI	146976	146977	+	0	0	0	0	0	0	SITE1592	CLUST299
chrVI	150820	150821	+	0	0	0	0	0	0	SITE1593	CLUST300
chrVI	158016	158017	+	0	0	4086	0	0	1	SITE1596	CLUST301
chrVI	158017	158018	+	0	1021	221	0	1	1	SITE1597	CLUST301
chrVI	158018	158019	+	0	7199	571	0	4	1	SITE1598	CLUST301
chrVI	158019	158020	+	100179	60311	57384	12	22	15	SITE1600	CLUST301
chrVI	158020	158021	+	11160	6773	0	1	1	0	SITE1601	CLUST301
chrVI	158020	158021	-	5797	0	0	1	0	0	SITE1602	CLUST301
chrVI	158021	158022	-	0	9426	0	0	2	0	SITE1604	CLUST301
chrVI	158022	158023	-	21010	52998	42971	7	21	13	SITE1605	CLUST301
chrVI	158023	158024	-	0	0	12224	0	0	1	SITE1606	CLUST301
chrVI	158358	158359	-	0	0	528	0	0	1	SITE1609	CLUST302
chrVI	162210	162211	+	605	6683	1990	2	3	1	SITE1610	CLUST303
chrVI	162211	162212	+	37766	31808	51569	17	13	19	SITE1611	CLUST303
chrVI	162212	162213	+	787	2333	9461	1	3	3	SITE1612	CLUST303
chrVI	162214	162215	-	48881	81102	60607	12	22	20	SITE1617	CLUST303
chrVI	162215	162216	-	0	5185	6130	0	4	2	SITE1619	CLUST303
chrVI	162216	162217	-	0	1009	0	0	1	0	SITE1620	CLUST303
chrVI	167411	167412	-	0	0	0	0	0	0	SITE1622	CLUST304
chrVI	167414	167415	-	0	0	1389	0	0	1	SITE1623	CLUST304
chrVI	167419	167420	+	203	0	0	1	0	0	SITE1624	CLUST304
chrVI	167421	167422	+	15917	10300	11614	4	6	2	SITE1626	CLUST304
chrVI	167422	167423	+	0	1923	0	0	1	0	SITE1627	CLUST304
chrVI	167423	167424	+	0	1217	217	0	1	1	SITE1628	CLUST304
chrVI	167424	167425	-	13411	5422	11202	8	7	8	SITE1632	CLUST304
chrVI	167425	167426	-	0	2298	8973	0	1	1	SITE1633	CLUST304
chrVI	167430	167431	+	0	1033	0	0	1	0	SITE1635	CLUST304
chrVI	167433	167434	-	0	5543	0	0	2	0	SITE1637	CLUST304
chrVI	178683	178684	+	0	0	0	0	0	0	SITE1639	CLUST305
chrVI	181049	181050	+	445	0	0	1	0	0	SITE1640	CLUST306
chrVI	181050	181051	+	243	0	0	1	0	0	SITE1641	CLUST306
chrVI	181051	181052	+	0	17355	0	0	1	0	SITE1642	CLUST306
chrVI	181053	181054	+	0	6301	0	0	1	0	SITE1644	CLUST306
chrVI	181054	181055	+	16572	43747	87571	5	9	17	SITE1645	CLUST306
chrVI	181055	181056	+	9148	19808	49466	3	3	7	SITE1647	CLUST306
chrVI	181055	181056	-	510	0	0	1	0	0	SITE1648	CLUST306
chrVI	181057	181058	+	14661	45160	13009	2	7	2	SITE1650	CLUST306
chrVI	181057	181058	-	52021	19664	45193	10	7	7	SITE1652	CLUST306
chrVI	181058	181059	-	2383	2577	53501	3	2	5	SITE1654	CLUST306
chrVI	181060	181061	-	0	5071	4891	0	2	1	SITE1656	CLUST306
chrVI	186453	186454	-	16200	0	0	2	0	0	SITE1661	CLUST307
chrVI	187009	187010	+	0	0	0	0	0	0	SITE1662	CLUST308
chrVI	189688	189689	+	0	0	0	0	0	0	SITE1663	CLUST309
chrVI	191620	191621	+	392	8040	0	1	1	0	SITE1669	CLUST310
chrVI	191621	191622	+	239	0	8115	1	0	3	SITE1670	CLUST310
chrVI	191622	191623	+	0	0	1902	0	0	1	SITE1671	CLUST310
chrVI	191621	191622	-	0	0	0	0	0	0	SITE1672	CLUST310
chrVI	191623	191624	+	12920	5274	7465	5	3	4	SITE1673	CLUST310
chrVI	191622	191623	-	1102	0	0	2	0	0	SITE1674	CLUST310
chrVI	191624	191625	+	38206	82885	145806	10	27	28	SITE1675	CLUST310
chrVI	191624	191625	-	5933	455	2132	1	1	2	SITE1677	CLUST310
chrVI	191627	191628	+	0	7658	0	0	2	0	SITE1679	CLUST310
chrVI	191626	191627	-	18455	22400	5587	6	4	2	SITE1680	CLUST310
chrVI	191627	191628	-	15072	53856	75475	13	13	16	SITE1681	CLUST310
chrVI	191628	191629	-	14286	0	2043	1	0	1	SITE1682	CLUST310
chrVI	191629	191630	-	0	1370	573	0	1	2	SITE1683	CLUST310
chrVI	191636	191637	-	4602	0	0	1	0	0	SITE1687	CLUST310
chrVI	196839	196840	+	0	0	2201	0	0	1	SITE1690	CLUST311
chrVI	205007	205008	+	809	0	14751	1	0	1	SITE1693	CLUST312
chrVI	205008	205009	+	143199	45964	134604	17	16	17	SITE1694	CLUST312
chrVI	205010	205011	-	0	0	0	0	0	0	SITE1699	CLUST312
chrVI	205011	205012	-	4997	28248	58514	5	14	20	SITE1701	CLUST312
chrVI	205013	205014	-	0	6799	0	0	1	0	SITE1703	CLUST312
chrVI	210708	210709	-	0	0	0	0	0	0	SITE1706	CLUST313
chrVI	210713	210714	-	0	4415	0	0	1	0	SITE1708	CLUST313
chrVI	210718	210719	+	0	14082	3669	0	2	1	SITE1709	CLUST313
chrVI	210719	210720	+	37866	51667	45314	10	15	15	SITE1711	CLUST313
chrVI	210720	210721	+	10247	10254	8232	5	4	4	SITE1713	CLUST313
chrVI	210721	210722	-	0	0	10206	0	0	2	SITE1716	CLUST313
chrVI	210722	210723	-	45474	15738	16439	8	9	9	SITE1717	CLUST313
chrVI	210723	210724	-	2194	6803	32418	3	4	5	SITE1718	CLUST313
chrVI	210724	210725	-	0	0	0	0	0	0	SITE1719	CLUST313
chrVI	218076	218077	+	0	0	0	0	0	0	SITE1723	CLUST314
chrVI	225184	225185	+	1132	0	0	1	0	0	SITE1724	CLUST315
chrVI	226769	226770	+	1181	0	0	1	0	0	SITE1725	CLUST316
chrVI	226770	226771	-	0	1306	0	0	1	0	SITE1726	CLUST316
chrVI	226773	226774	+	460	0	0	1	0	0	SITE1727	CLUST316
chrVI	226774	226775	+	143752	59619	149184	26	19	39	SITE1728	CLUST316
chrVI	226776	226777	-	0	0	1951	0	0	1	SITE1733	CLUST316
chrVI	226777	226778	-	121197	61627	85318	28	24	29	SITE1734	CLUST316
chrVII	31835	31836	-	0	0	0	0	0	0	SITE1743	CLUST317
chrVII	61589	61590	+	0	0	0	0	0	0	SITE1746	CLUST318
chrVII	73910	73911	+	0	0	1063	0	0	2	SITE1747	CLUST319
chrVII	73911	73912	+	10565	10283	29697	4	4	8	SITE1748	CLUST319
chrVII	73912	73913	+	12681	20977	15773	5	6	8	SITE1749	CLUST319
chrVII	73913	73914	+	109031	64639	158496	23	27	30	SITE1750	CLUST319
chrVII	73912	73913	-	0	0	1582	0	0	1	SITE1751	CLUST319
chrVII	73914	73915	-	116	9425	14684	1	4	4	SITE1753	CLUST319
chrVII	73915	73916	-	2422	13842	20206	2	8	9	SITE1754	CLUST319
chrVII	73916	73917	-	28005	78106	109396	14	27	28	SITE1755	CLUST319
chrVII	73917	73918	+	0	0	312	0	0	1	SITE1756	CLUST319
chrVII	73921	73922	+	1122	146	9337	1	1	1	SITE1759	CLUST319
chrVII	73924	73925	-	0	0	0	0	0	0	SITE1760	CLUST319
chrVII	91737	91738	-	0	0	0	0	0	0	SITE1761	CLUST320
chrVII	110705	110706	+	0	0	0	0	0	0	SITE1764	CLUST321
chrVII	110708	110709	+	4652	26094	9541	9	7	5	SITE1766	CLUST321
chrVII	110709	110710	+	3657	9998	24849	2	5	10	SITE1768	CLUST321
chrVII	110710	110711	+	8069	5993	0	1	1	0	SITE1770	CLUST321
chrVII	110709	110710	-	0	739	0	0	1	0	SITE1771	CLUST321
chrVII	110711	110712	+	0	0	0	0	0	0	SITE1773	CLUST321
chrVII	110711	110712	-	64257	84595	58320	8	14	10	SITE1774	CLUST321
chrVII	110712	110713	-	1834	6290	15069	4	2	4	SITE1775	CLUST321
chrVII	111570	111571	+	0	2899	0	0	1	0	SITE1778	CLUST322
chrVII	115461	115462	+	11596	0	0	1	0	0	SITE1779	CLUST323
chrVII	115472	115473	+	17947	14072	30867	5	5	6	SITE1781	CLUST323
chrVII	115473	115474	+	180	855	9942	1	1	2	SITE1782	CLUST323
chrVII	115473	115474	-	0	0	0	0	0	0	SITE1784	CLUST323
chrVII	115475	115476	-	20040	35706	53452	10	13	15	SITE1787	CLUST323
chrVII	115476	115477	-	352	0	0	1	0	0	SITE1788	CLUST323
chrVII	115477	115478	-	0	0	8608	0	0	1	SITE1790	CLUST323
chrVII	115484	115485	+	0	0	0	0	0	0	SITE1792	CLUST323
chrVII	122254	122255	+	64984	82846	120434	17	21	22	SITE1797	CLUST324
chrVII	122257	122258	-	60330	118590	134304	21	24	22	SITE1801	CLUST324
chrVII	122258	122259	-	80	0	0	1	0	0	SITE1803	CLUST324
chrVII	122261	122262	-	1042	0	0	1	0	0	SITE1805	CLUST324
chrVII	122265	122266	+	0	4423	0	0	1	0	SITE1806	CLUST324
chrVII	122282	122283	-	0	0	9843	0	0	1	SITE1809	CLUST324
chrVII	127375	127376	+	0	0	0	0	0	0	SITE1811	CLUST325
chrVII	165188	165189	+	0	0	0	0	0	0	SITE1817	CLUST326
chrVII	166035	166036	-	0	0	0	0	0	0	SITE1819	CLUST327
chrVII	166342	166343	-	0	159	0	0	1	0	SITE1820	CLUST328
chrVII	185798	185799	+	13532	20940	24322	5	11	6	SITE1825	CLUST329
chrVII	185800	185801	+	0	2000	0	0	1	0	SITE1828	CLUST329
chrVII	185801	185802	-	37699	108	5103	5	1	3	SITE1832	CLUST329
chrVII	195774	195775	-	0	0	0	0	0	0	SITE1834	CLUST330
chrVII	205504	205505	+	25266	61329	82625	9	14	14	SITE1838	CLUST331
chrVII	205505	205506	+	1898	3803	2797	2	2	3	SITE1839	CLUST331
chrVII	205506	205507	+	0	4571	0	0	1	0	SITE1841	CLUST331
chrVII	205505	205506	-	0	898	20009	0	1	1	SITE1842	CLUST331
chrVII	205507	205508	-	48629	63574	75627	14	19	9	SITE1844	CLUST331
chrVII	205508	205509	+	0	4513	0	0	1	0	SITE1845	CLUST331
chrVII	205508	205509	-	0	125	18103	0	1	2	SITE1846	CLUST331
chrVII	205509	205510	-	3845	0	158	1	0	1	SITE1847	CLUST331
chrVII	205515	205516	+	0	0	0	0	0	0	SITE1852	CLUST331
chrVII	271482	271483	+	0	0	0	0	0	0	SITE1856	CLUST332
chrVII	271593	271594	+	0	0	456	0	0	1	SITE1857	CLUST333
chrVII	282150	282151	+	0	0	0	0	0	0	SITE1859	CLUST334
chrVII	287303	287304	-	0	0	0	0	0	0	SITE1860	CLUST335
chrVII	287339	287340	-	5926	0	0	1	0	0	SITE1861	CLUST335
chrVII	287461	287462	+	3327	1031	2630	2	2	2	SITE1864	CLUST336
chrVII	287461	287462	-	7302	0	0	1	0	0	SITE1865	CLUST336
chrVII	287462	287463	+	23899	45376	60395	10	20	15	SITE1866	CLUST336
chrVII	287463	287464	+	0	0	4236	0	0	2	SITE1867	CLUST336
chrVII	287464	287465	-	0	440	1924	0	1	1	SITE1868	CLUST336
chrVII	287465	287466	-	6163	20407	110330	3	11	19	SITE1869	CLUST336
chrVII	287466	287467	-	0	0	6862	0	0	2	SITE1870	CLUST336
chrVII	287468	287469	+	174	0	0	1	0	0	SITE1871	CLUST336
chrVII	299846	299847	+	6162	0	0	1	0	0	SITE1877	CLUST337
chrVII	319421	319422	-	0	0	0	0	0	0	SITE1879	CLUST338
chrVII	319762	319763	+	25118	2798	17453	2	2	1	SITE1890	CLUST339
chrVII	319763	319764	+	0	0	0	0	0	0	SITE1891	CLUST339
chrVII	319764	319765	+	72855	66649	117498	17	22	29	SITE1892	CLUST339
chrVII	319765	319766	-	0	0	13617	0	0	2	SITE1896	CLUST339
chrVII	319766	319767	+	25756	841	5466	1	1	1	SITE1897	CLUST339
chrVII	319766	319767	-	0	0	0	0	0	0	SITE1898	CLUST339
chrVII	319767	319768	+	11492	0	0	1	0	0	SITE1899	CLUST339
chrVII	319767	319768	-	102907	70645	164233	20	23	31	SITE1901	CLUST339
chrVII	319769	319770	-	0	0	0	0	0	0	SITE1903	CLUST339
chrVII	321401	321402	+	0	113	0	0	1	0	SITE1907	CLUST340
chrVII	328566	328567	+	0	3965	0	0	2	0	SITE1917	CLUST341
chrVII	328567	328568	+	22420	32007	41683	9	7	5	SITE1918	CLUST341
chrVII	328568	328569	+	24649	0	2448	1	0	1	SITE1919	CLUST341
chrVII	328568	328569	-	0	3848	67	0	2	1	SITE1921	CLUST341
chrVII	328569	328570	-	0	0	2986	0	0	2	SITE1923	CLUST341
chrVII	328570	328571	+	0	2350	0	0	1	0	SITE1924	CLUST341
chrVII	328570	328571	-	353	12662	21176	2	10	5	SITE1925	CLUST341
chrVII	328571	328572	-	2530	9231	10445	1	3	4	SITE1927	CLUST341
chrVII	345772	345773	+	0	0	0	0	0	0	SITE1930	CLUST342
chrVII	352177	352178	-	0	0	0	0	0	0	SITE1931	CLUST343
chrVII	353314	353315	-	0	0	0	0	0	0	SITE1932	CLUST344
chrVII	359404	359405	+	0	0	0	0	0	0	SITE1933	CLUST345
chrVII	361884	361885	+	0	0	0	0	0	0	SITE1934	CLUST346
chrVII	364910	364911	-	0	0	0	0	0	0	SITE1935	CLUST347
chrVII	366662	366663	+	262	0	0	1	0	0	SITE1936	CLUST348
chrVII	387641	387642	+	0	0	0	0	0	0	SITE1939	CLUST349
chrVII	399441	399442	+	0	0	0	0	0	0	SITE1941	CLUST350
chrVII	401608	401609	+	0	1770	0	0	1	0	SITE1944	CLUST351
chrVII	401609	401610	+	0	0	0	0	0	0	SITE1945	CLUST351
chrVII	401610	401611	+	909	2712	17466	1	4	7	SITE1947	CLUST351
chrVII	401611	401612	+	1130	3620	13266	2	5	13	SITE1948	CLUST351
chrVII	401612	401613	+	0	391	0	0	2	0	SITE1949	CLUST351
chrVII	401612	401613	-	0	0	8773	0	0	1	SITE1950	CLUST351
chrVII	401613	401614	-	19411	21669	44819	7	10	10	SITE1952	CLUST351
chrVII	401614	401615	-	38867	28946	48385	12	14	13	SITE1954	CLUST351
chrVII	401615	401616	-	0	1198	258	0	2	1	SITE1955	CLUST351
chrVII	405437	405438	+	0	2139	0	0	1	0	SITE1958	CLUST352
chrVII	405451	405452	-	20866	2608	8237	1	1	2	SITE1960	CLUST352
chrVII	405453	405454	+	0	4255	12800	0	1	2	SITE1962	CLUST352
chrVII	405454	405455	+	3265	0	0	1	0	0	SITE1963	CLUST352
chrVII	405455	405456	+	71709	22324	8484	6	6	3	SITE1964	CLUST352
chrVII	405454	405455	-	0	359	0	0	1	0	SITE1965	CLUST352
chrVII	405455	405456	-	0	7584	0	0	1	0	SITE1966	CLUST352
chrVII	405456	405457	+	21742	0	0	1	0	0	SITE1967	CLUST352
chrVII	405456	405457	-	113	0	1869	1	0	1	SITE1968	CLUST352
chrVII	405457	405458	+	8865	0	1229	2	0	2	SITE1969	CLUST352
chrVII	405458	405459	-	61119	30546	49073	7	14	13	SITE1972	CLUST352
chrVII	405459	405460	-	0	0	14041	0	0	1	SITE1974	CLUST352
chrVII	405461	405462	+	19066	0	0	1	0	0	SITE1975	CLUST352
chrVII	405460	405461	-	9040	5481	5390	2	4	1	SITE1976	CLUST352
chrVII	405464	405465	-	0	0	0	0	0	0	SITE1977	CLUST352
chrVII	412378	412379	+	47465	21226	23439	5	3	5	SITE1981	CLUST353
chrVII	412379	412380	+	14055	6600	30474	2	3	5	SITE1983	CLUST353
chrVII	412380	412381	+	24413	55759	52380	14	13	10	SITE1984	CLUST353
chrVII	412381	412382	-	7032	7092	9901	1	4	6	SITE1987	CLUST353
chrVII	412382	412383	-	366	13374	17057	2	6	4	SITE1989	CLUST353
chrVII	412383	412384	-	68866	13877	63638	12	8	13	SITE1990	CLUST353
chrVII	412384	412385	-	0	0	0	0	0	0	SITE1991	CLUST353
chrVII	423069	423070	-	238	0	0	1	0	0	SITE1992	CLUST354
chrVII	423071	423072	-	0	0	4257	0	0	1	SITE1994	CLUST354
chrVII	423076	423077	+	67214	54569	57608	16	23	16	SITE1996	CLUST354
chrVII	423078	423079	+	0	7839	0	0	1	0	SITE1998	CLUST354
chrVII	423079	423080	+	271	0	0	1	0	0	SITE2000	CLUST354
chrVII	423079	423080	-	60333	116881	121890	19	36	36	SITE2002	CLUST354
chrVII	423081	423082	-	430	4337	4239	1	3	1	SITE2005	CLUST354
chrVII	423082	423083	-	0	0	3789	0	0	1	SITE2008	CLUST354
chrVII	423705	423706	-	0	0	0	0	0	0	SITE2010	CLUST355
chrVII	436844	436845	-	0	0	0	0	0	0	SITE2011	CLUST356
chrVII	440815	440816	+	0	0	3901	0	0	1	SITE2012	CLUST357
chrVII	440818	440819	-	0	157	5434	0	1	1	SITE2014	CLUST357
chrVII	440819	440820	+	3105	0	0	1	0	0	SITE2015	CLUST357
chrVII	440820	440821	+	97456	43101	63058	12	17	18	SITE2016	CLUST357
chrVII	440821	440822	+	0	1356	14078	0	1	1	SITE2017	CLUST357
chrVII	440822	440823	+	0	2528	105	0	1	1	SITE2019	CLUST357
chrVII	440822	440823	-	0	0	303	0	0	1	SITE2020	CLUST357
chrVII	440823	440824	-	22895	16765	51220	12	10	18	SITE2021	CLUST357
chrVII	440824	440825	-	0	0	3580	0	0	2	SITE2022	CLUST357
chrVII	445225	445226	-	0	0	0	0	0	0	SITE2025	CLUST358
chrVII	450319	450320	+	0	0	0	0	0	0	SITE2026	CLUST359
chrVII	459787	459788	-	2105	0	0	1	0	0	SITE2027	CLUST360
chrVII	472799	472800	-	24306	0	0	1	0	0	SITE2028	CLUST361
chrVII	499024	499025	-	0	0	0	0	0	0	SITE2029	CLUST362
chrVII	509833	509834	-	0	0	0	0	0	0	SITE2030	CLUST363
chrVII	531592	531593	+	18099	6872	5497	2	4	2	SITE2033	CLUST364
chrVII	531594	531595	+	0	0	12133	0	0	1	SITE2035	CLUST364
chrVII	531595	531596	+	0	3189	6512	0	1	2	SITE2036	CLUST364
chrVII	531595	531596	-	272	13634	13055	2	4	5	SITE2038	CLUST364
chrVII	531596	531597	+	0	0	2329	0	0	1	SITE2039	CLUST364
chrVII	531596	531597	-	0	0	9610	0	0	1	SITE2040	CLUST364
chrVII	531597	531598	+	40532	53288	90599	8	15	20	SITE2041	CLUST364
chrVII	531597	531598	-	0	3720	0	0	1	0	SITE2043	CLUST364
chrVII	531598	531599	-	203	2823	3923	1	1	2	SITE2044	CLUST364
chrVII	531599	531600	+	0	0	0	0	0	0	SITE2045	CLUST364
chrVII	531600	531601	-	104398	38013	59305	15	12	15	SITE2047	CLUST364
chrVII	532717	532718	+	0	0	0	0	0	0	SITE2050	CLUST365
chrVII	535621	535622	+	0	546	0	0	2	0	SITE2051	CLUST366
chrVII	541834	541835	+	2189	16034	6207	3	4	3	SITE2052	CLUST367
chrVII	541835	541836	+	0	4179	0	0	1	0	SITE2053	CLUST367
chrVII	541837	541838	-	9185	6796	11097	4	3	2	SITE2055	CLUST367
chrVII	541838	541839	-	0	8003	0	0	2	0	SITE2056	CLUST367
chrVII	541839	541840	-	130	0	9550	1	0	1	SITE2057	CLUST367
chrVII	544653	544654	-	0	0	0	0	0	0	SITE2058	CLUST368
chrVII	544659	544660	+	2243	16764	7967	2	3	1	SITE2059	CLUST368
chrVII	544660	544661	+	29580	47190	94358	3	6	17	SITE2061	CLUST368
chrVII	544659	544660	-	0	0	12250	0	0	1	SITE2062	CLUST368
chrVII	544661	544662	+	0	4701	0	0	1	0	SITE2064	CLUST368
chrVII	544662	544663	+	50454	2855	11760	5	2	3	SITE2065	CLUST368
chrVII	544662	544663	-	1309	12613	2364	2	3	1	SITE2067	CLUST368
chrVII	544663	544664	-	18592	47279	53869	3	8	8	SITE2069	CLUST368
chrVII	544664	544665	-	295	1724	0	1	1	0	SITE2071	CLUST368
chrVII	544665	544666	-	28554	27998	50599	7	7	10	SITE2072	CLUST368
chrVII	544668	544669	+	0	417	915	0	1	1	SITE2073	CLUST368
chrVII	555221	555222	+	0	0	0	0	0	0	SITE2075	CLUST369
chrVII	555223	555224	+	0	1428	348	0	1	1	SITE2076	CLUST369
chrVII	555225	555226	+	0	233	0	0	1	0	SITE2078	CLUST369
chrVII	555229	555230	-	0	0	80	0	0	1	SITE2080	CLUST369
chrVII	555231	555232	-	0	0	0	0	0	0	SITE2082	CLUST369
chrVII	555243	555244	+	0	0	0	0	0	0	SITE2085	CLUST369
chrVII	561723	561724	+	0	0	0	0	0	0	SITE2086	CLUST370
chrVII	561747	561748	+	0	66	0	0	1	0	SITE2087	CLUST370
chrVII	561751	561752	+	195	0	0	1	0	0	SITE2088	CLUST370
chrVII	561752	561753	+	88	0	0	1	0	0	SITE2089	CLUST370
chrVII	561753	561754	-	23280	0	0	1	0	0	SITE2091	CLUST370
chrVII	561754	561755	+	5570	11207	991	3	3	2	SITE2092	CLUST370
chrVII	561755	561756	+	25503	6237	29275	6	5	8	SITE2094	CLUST370
chrVII	561756	561757	+	1163	1194	1992	2	2	3	SITE2095	CLUST370
chrVII	561757	561758	+	1143	3595	6819	2	4	3	SITE2096	CLUST370
chrVII	561757	561758	-	0	13484	1032	0	2	2	SITE2098	CLUST370
chrVII	561758	561759	-	8882	1961	19688	3	2	4	SITE2099	CLUST370
chrVII	561759	561760	-	7003	3917	5101	1	4	2	SITE2101	CLUST370
chrVII	561760	561761	-	12020	3741	5972	2	4	4	SITE2102	CLUST370
chrVII	584608	584609	+	2653	0	0	1	0	0	SITE2104	CLUST371
chrVII	587765	587766	-	0	0	0	0	0	0	SITE2105	CLUST372
chrVII	601238	601239	+	0	0	0	0	0	0	SITE2106	CLUST373
chrVII	614267	614268	+	0	0	0	0	0	0	SITE2109	CLUST374
chrVII	625638	625639	+	0	0	0	0	0	0	SITE2116	CLUST375
chrVII	636506	636507	-	0	0	0	0	0	0	SITE2117	CLUST376
chrVII	661729	661730	+	0	0	1603	0	0	1	SITE2120	CLUST377
chrVII	661731	661732	+	128	0	0	1	0	0	SITE2121	CLUST377
chrVII	661733	661734	+	29140	40124	47534	11	21	22	SITE2124	CLUST377
chrVII	661732	661733	-	0	10688	9958	0	3	2	SITE2125	CLUST377
chrVII	661734	661735	+	150	0	0	1	0	0	SITE2126	CLUST377
chrVII	661735	661736	-	0	0	0	0	0	0	SITE2129	CLUST377
chrVII	661737	661738	+	0	0	2546	0	0	1	SITE2130	CLUST377
chrVII	661736	661737	-	46797	66968	85004	13	28	23	SITE2131	CLUST377
chrVII	661737	661738	-	17946	0	0	1	0	0	SITE2132	CLUST377
chrVII	663385	663386	+	0	0	0	0	0	0	SITE2133	CLUST378
chrVII	700654	700655	+	0	2067	0	0	1	0	SITE2134	CLUST379
chrVII	700655	700656	+	0	216	9921	0	1	1	SITE2135	CLUST379
chrVII	700656	700657	+	0	198	0	0	1	0	SITE2136	CLUST379
chrVII	700657	700658	+	63078	25661	87988	11	7	13	SITE2138	CLUST379
chrVII	700656	700657	-	1484	0	0	1	0	0	SITE2139	CLUST379
chrVII	700657	700658	-	0	15913	677	0	2	1	SITE2140	CLUST379
chrVII	700658	700659	+	105764	94896	61128	18	25	25	SITE2141	CLUST379
chrVII	700659	700660	+	812	10717	29326	1	4	5	SITE2143	CLUST379
chrVII	700659	700660	-	17301	285	7176	2	1	1	SITE2144	CLUST379
chrVII	700660	700661	+	0	0	16616	0	0	1	SITE2145	CLUST379
chrVII	700660	700661	-	28803	48938	44190	9	15	12	SITE2146	CLUST379
chrVII	700661	700662	+	0	865	0	0	1	0	SITE2147	CLUST379
chrVII	700662	700663	+	1482	0	6592	2	0	1	SITE2148	CLUST379
chrVII	700661	700662	-	148205	76950	63482	30	29	20	SITE2149	CLUST379
chrVII	700662	700663	-	10278	3565	36785	3	4	7	SITE2150	CLUST379
chrVII	700663	700664	-	1680	1209	1004	2	1	1	SITE2151	CLUST379
chrVII	700664	700665	-	16572	0	0	1	0	0	SITE2152	CLUST379
chrVII	701052	701053	-	0	2033	0	0	1	0	SITE2156	CLUST380
chrVII	701057	701058	+	0	50	0	0	1	0	SITE2158	CLUST380
chrVII	701058	701059	+	14348	0	0	2	0	0	SITE2159	CLUST380
chrVII	701057	701058	-	0	0	0	0	0	0	SITE2160	CLUST380
chrVII	701060	701061	+	54662	61582	99167	17	28	25	SITE2163	CLUST380
chrVII	701060	701061	-	0	1039	0	0	1	0	SITE2164	CLUST380
chrVII	701061	701062	-	0	2357	991	0	2	1	SITE2167	CLUST380
chrVII	701063	701064	-	26062	71561	44028	16	28	17	SITE2170	CLUST380
chrVII	701068	701069	+	0	0	756	0	0	1	SITE2173	CLUST380
chrVII	701068	701069	-	0	0	0	0	0	0	SITE2174	CLUST380
chrVII	707188	707189	+	503	1172	0	1	1	0	SITE2177	CLUST381
chrVII	707190	707191	+	865	1382	29081	3	2	11	SITE2179	CLUST381
chrVII	707191	707192	+	0	50	7014	0	1	1	SITE2180	CLUST381
chrVII	707193	707194	-	59854	20465	29850	9	11	12	SITE2184	CLUST381
chrVII	707194	707195	-	63	9743	6240	1	3	2	SITE2185	CLUST381
chrVII	707195	707196	-	0	6025	0	0	1	0	SITE2186	CLUST381
chrVII	707534	707535	+	0	0	4026	0	0	1	SITE2190	CLUST382
chrVII	707535	707536	+	14482	133689	121109	24	68	83	SITE2191	CLUST382
chrVII	707536	707537	+	0	0	0	0	0	0	SITE2192	CLUST382
chrVII	707603	707604	+	0	0	0	0	0	0	SITE2193	CLUST383
chrVII	707681	707682	+	0	0	0	0	0	0	SITE2197	CLUST384
chrVII	707735	707736	-	0	0	0	0	0	0	SITE2198	CLUST385
chrVII	707761	707762	+	857	0	198	1	0	1	SITE2199	CLUST385
chrVII	707790	707791	+	0	0	0	0	0	0	SITE2200	CLUST386
chrVII	707884	707885	-	0	0	0	0	0	0	SITE2202	CLUST387
chrVII	707924	707925	-	0	0	0	0	0	0	SITE2203	CLUST387
chrVII	707934	707935	-	0	0	1301	0	0	1	SITE2204	CLUST388
chrVII	708070	708071	-	0	0	0	0	0	0	SITE2205	CLUST389
chrVII	708079	708080	-	0	0	3871	0	0	1	SITE2206	CLUST389
chrVII	708092	708093	-	0	0	2832	0	0	1	SITE2207	CLUST389
chrVII	708097	708098	+	0	0	0	0	0	0	SITE2208	CLUST389
chrVII	708329	708330	-	0	0	0	0	0	0	SITE2210	CLUST390
chrVII	708433	708434	-	0	0	0	0	0	0	SITE2211	CLUST391
chrVII	708462	708463	-	0	0	0	0	0	0	SITE2212	CLUST391
chrVII	708486	708487	-	0	0	0	0	0	0	SITE2213	CLUST392
chrVII	708529	708530	-	0	0	0	0	0	0	SITE2214	CLUST392
chrVII	708583	708584	-	0	0	0	0	0	0	SITE2215	CLUST393
chrVII	708625	708626	-	0	0	0	0	0	0	SITE2216	CLUST393
chrVII	708778	708779	+	0	0	591	0	0	1	SITE2219	CLUST394
chrVII	708819	708820	-	0	0	0	0	0	0	SITE2222	CLUST394
chrVII	708836	708837	+	729	3716	16501	2	4	3	SITE2224	CLUST395
chrVII	708855	708856	-	0	0	0	0	0	0	SITE2226	CLUST395
chrVII	708954	708955	+	0	0	0	0	0	0	SITE2228	CLUST396
chrVII	708955	708956	+	0	0	0	0	0	0	SITE2229	CLUST396
chrVII	708967	708968	-	0	0	9265	0	0	1	SITE2230	CLUST396
chrVII	708975	708976	+	0	0	0	0	0	0	SITE2231	CLUST396
chrVII	709163	709164	+	0	0	0	0	0	0	SITE2234	CLUST397
chrVII	709265	709266	+	0	0	0	0	0	0	SITE2235	CLUST398
chrVII	709397	709398	-	0	0	0	0	0	0	SITE2237	CLUST399
chrVII	709410	709411	+	0	0	15845	0	0	1	SITE2239	CLUST399
chrVII	709413	709414	-	0	0	0	0	0	0	SITE2241	CLUST399
chrVII	709439	709440	+	0	0	0	0	0	0	SITE2243	CLUST399
chrVII	709452	709453	-	0	0	0	0	0	0	SITE2244	CLUST400
chrVII	709513	709514	-	0	0	0	0	0	0	SITE2245	CLUST401
chrVII	709589	709590	-	79202	77900	80852	7	13	16	SITE2247	CLUST402
chrVII	709622	709623	+	0	0	0	0	0	0	SITE2250	CLUST402
chrVII	709706	709707	+	0	0	0	0	0	0	SITE2252	CLUST403
chrVII	709763	709764	-	0	0	0	0	0	0	SITE2253	CLUST404
chrVII	709778	709779	-	0	0	0	0	0	0	SITE2254	CLUST404
chrVII	709853	709854	-	0	0	21630	0	0	1	SITE2256	CLUST405
chrVII	710228	710229	-	0	0	0	0	0	0	SITE2257	CLUST406
chrVII	710308	710309	-	422	0	0	1	0	0	SITE2258	CLUST407
chrVII	710490	710491	+	0	0	0	0	0	0	SITE2259	CLUST408
chrVII	710547	710548	+	0	0	0	0	0	0	SITE2261	CLUST409
chrVII	710714	710715	-	0	0	0	0	0	0	SITE2262	CLUST410
chrVII	710936	710937	-	0	0	0	0	0	0	SITE2265	CLUST411
chrVII	710937	710938	+	0	0	0	0	0	0	SITE2266	CLUST411
chrVII	710947	710948	+	0	0	0	0	0	0	SITE2269	CLUST411
chrVII	710950	710951	-	0	0	0	0	0	0	SITE2270	CLUST411
chrVII	711060	711061	-	0	89	1114	0	1	1	SITE2271	CLUST412
chrVII	711061	711062	+	0	0	0	0	0	0	SITE2272	CLUST412
chrVII	711090	711091	-	0	0	0	0	0	0	SITE2274	CLUST412
chrVII	711093	711094	+	0	0	0	0	0	0	SITE2275	CLUST412
chrVII	711113	711114	-	0	0	0	0	0	0	SITE2277	CLUST413
chrVII	711121	711122	-	0	0	1214	0	0	1	SITE2279	CLUST413
chrVII	711230	711231	-	5028	0	0	1	0	0	SITE2280	CLUST414
chrVII	711245	711246	+	250	0	0	1	0	0	SITE2281	CLUST414
chrVII	711252	711253	-	0	0	1958	0	0	1	SITE2282	CLUST414
chrVII	711256	711257	+	0	0	0	0	0	0	SITE2284	CLUST414
chrVII	711297	711298	-	0	0	0	0	0	0	SITE2285	CLUST415
chrVII	711340	711341	+	0	0	0	0	0	0	SITE2286	CLUST415
chrVII	711417	711418	+	0	0	0	0	0	0	SITE2287	CLUST416
chrVII	711456	711457	+	0	0	0	0	0	0	SITE2289	CLUST416
chrVII	711459	711460	-	0	0	0	0	0	0	SITE2290	CLUST416
chrVII	711657	711658	+	0	0	0	0	0	0	SITE2291	CLUST417
chrVII	711760	711761	+	0	0	0	0	0	0	SITE2292	CLUST418
chrVII	711762	711763	+	0	0	151	0	0	1	SITE2293	CLUST418
chrVII	711764	711765	+	0	0	0	0	0	0	SITE2294	CLUST418
chrVII	711796	711797	+	0	0	0	0	0	0	SITE2295	CLUST418
chrVII	711888	711889	-	0	0	0	0	0	0	SITE2298	CLUST419
chrVII	711954	711955	-	0	0	0	0	0	0	SITE2300	CLUST420
chrVII	711971	711972	+	0	0	0	0	0	0	SITE2302	CLUST420
chrVII	712033	712034	+	0	0	0	0	0	0	SITE2303	CLUST421
chrVII	712066	712067	+	0	0	0	0	0	0	SITE2304	CLUST421
chrVII	712086	712087	-	0	0	0	0	0	0	SITE2305	CLUST422
chrVII	712204	712205	-	265	4297	6014	1	2	1	SITE2308	CLUST423
chrVII	712546	712547	+	0	4566	0	0	2	0	SITE2309	CLUST424
chrVII	718694	718695	+	0	0	0	0	0	0	SITE2313	CLUST425
chrVII	731119	731120	+	0	0	0	0	0	0	SITE2314	CLUST426
chrVII	731120	731121	+	0	1146	297	0	1	2	SITE2315	CLUST426
chrVII	731121	731122	+	21857	6197	20087	1	5	4	SITE2316	CLUST426
chrVII	731122	731123	+	18598	6531	1764	2	3	2	SITE2317	CLUST426
chrVII	731123	731124	+	0	0	2044	0	0	1	SITE2318	CLUST426
chrVII	731123	731124	-	8726	1029	733	4	1	1	SITE2319	CLUST426
chrVII	731124	731125	+	0	525	0	0	1	0	SITE2320	CLUST426
chrVII	731124	731125	-	9759	19128	4692	8	10	3	SITE2321	CLUST426
chrVII	731125	731126	+	0	0	0	0	0	0	SITE2322	CLUST426
chrVII	731125	731126	-	7584	31696	44369	4	7	9	SITE2323	CLUST426
chrVII	731126	731127	-	0	1741	0	0	1	0	SITE2324	CLUST426
chrVII	731134	731135	-	0	0	0	0	0	0	SITE2325	CLUST426
chrVII	736321	736322	+	3417	0	11767	2	0	2	SITE2333	CLUST427
chrVII	736322	736323	+	23264	57131	59649	6	9	11	SITE2334	CLUST427
chrVII	736323	736324	+	68481	87296	47020	13	20	12	SITE2335	CLUST427
chrVII	736324	736325	+	529	0	0	1	0	0	SITE2336	CLUST427
chrVII	739105	739106	+	0	555	310	0	1	1	SITE2342	CLUST428
chrVII	739107	739108	+	44950	20909	40535	3	4	4	SITE2344	CLUST428
chrVII	739108	739109	-	749	0	0	2	0	0	SITE2346	CLUST428
chrVII	739109	739110	-	0	15838	7670	0	3	2	SITE2348	CLUST428
chrVII	739110	739111	+	0	1259	0	0	1	0	SITE2349	CLUST428
chrVII	739110	739111	-	9373	43806	23879	3	9	9	SITE2350	CLUST428
chrVII	739112	739113	-	0	0	4228	0	0	1	SITE2353	CLUST428
chrVII	739666	739667	+	13288	0	0	1	0	0	SITE2357	CLUST429
chrVII	753634	753635	+	0	0	0	0	0	0	SITE2359	CLUST430
chrVII	774332	774333	+	0	9562	0	0	1	0	SITE2361	CLUST431
chrVII	774334	774335	+	45317	20551	40072	8	10	11	SITE2363	CLUST431
chrVII	774334	774335	-	0	4800	15374	0	1	1	SITE2365	CLUST431
chrVII	774335	774336	+	0	127	29836	0	1	8	SITE2366	CLUST431
chrVII	774336	774337	+	1693	0	0	1	0	0	SITE2367	CLUST431
chrVII	774336	774337	-	7291	890	1640	3	1	1	SITE2368	CLUST431
chrVII	774337	774338	-	32924	58559	47440	8	16	17	SITE2369	CLUST431
chrVII	774338	774339	-	3410	6599	19706	3	5	7	SITE2371	CLUST431
chrVII	774339	774340	-	21823	0	2029	2	0	1	SITE2372	CLUST431
chrVII	779598	779599	+	0	0	35737	0	0	3	SITE2375	CLUST432
chrVII	779599	779600	+	57124	42048	159856	15	16	34	SITE2376	CLUST432
chrVII	779600	779601	+	24428	35875	280	2	6	1	SITE2377	CLUST432
chrVII	779600	779601	-	0	0	2396	0	0	1	SITE2379	CLUST432
chrVII	779601	779602	+	12218	0	0	1	0	0	SITE2380	CLUST432
chrVII	779601	779602	-	7480	1547	10789	4	3	4	SITE2381	CLUST432
chrVII	779602	779603	-	47383	58783	105190	18	26	27	SITE2382	CLUST432
chrVII	779603	779604	-	2546	28336	14373	3	6	5	SITE2383	CLUST432
chrVII	779604	779605	+	0	0	0	0	0	0	SITE2384	CLUST432
chrVII	779604	779605	-	0	20685	0	0	2	0	SITE2385	CLUST432
chrVII	787293	787294	+	0	0	0	0	0	0	SITE2388	CLUST433
chrVII	794399	794400	+	0	0	6063	0	0	1	SITE2390	CLUST434
chrVII	794400	794401	+	679	1435	14528	1	1	1	SITE2391	CLUST434
chrVII	794401	794402	+	9839	14967	58394	6	9	10	SITE2392	CLUST434
chrVII	794402	794403	+	597	0	0	1	0	0	SITE2393	CLUST434
chrVII	794402	794403	-	84	0	0	1	0	0	SITE2394	CLUST434
chrVII	794403	794404	+	112	0	0	1	0	0	SITE2395	CLUST434
chrVII	794403	794404	-	0	478	0	0	1	0	SITE2396	CLUST434
chrVII	794404	794405	+	0	0	1765	0	0	1	SITE2397	CLUST434
chrVII	794404	794405	-	37541	33822	10390	6	13	5	SITE2398	CLUST434
chrVII	794405	794406	-	0	0	6349	0	0	2	SITE2399	CLUST434
chrVII	794406	794407	-	0	5208	1278	0	2	1	SITE2400	CLUST434
chrVII	794409	794410	-	0	0	0	0	0	0	SITE2401	CLUST434
chrVII	801800	801801	+	0	0	0	0	0	0	SITE2403	CLUST435
chrVII	810131	810132	-	0	0	0	0	0	0	SITE2405	CLUST436
chrVII	823464	823465	-	0	2749	0	0	1	0	SITE2408	CLUST437
chrVII	823466	823467	+	62561	58278	72819	20	24	17	SITE2410	CLUST437
chrVII	823467	823468	+	0	0	0	0	0	0	SITE2411	CLUST437
chrVII	823468	823469	+	129	0	0	1	0	0	SITE2412	CLUST437
chrVII	823469	823470	-	154354	156871	257244	34	34	35	SITE2414	CLUST437
chrVII	823470	823471	-	0	0	8068	0	0	1	SITE2416	CLUST437
chrVII	823471	823472	-	0	0	15860	0	0	1	SITE2417	CLUST437
chrVII	823473	823474	-	0	1933	0	0	1	0	SITE2418	CLUST437
chrVII	827301	827302	-	0	0	0	0	0	0	SITE2419	CLUST438
chrVII	828804	828805	-	0	0	2322	0	0	1	SITE2421	CLUST439
chrVII	828805	828806	+	0	0	573	0	0	1	SITE2422	CLUST439
chrVII	828806	828807	+	0	0	4747	0	0	1	SITE2423	CLUST439
chrVII	828807	828808	+	5470	410	0	2	1	0	SITE2425	CLUST439
chrVII	828807	828808	-	0	0	0	0	0	0	SITE2426	CLUST439
chrVII	828808	828809	-	206	3982	1888	1	3	1	SITE2427	CLUST439
chrVII	828809	828810	-	548	0	427	2	0	1	SITE2428	CLUST439
chrVII	828810	828811	-	17891	1003	1521	2	1	1	SITE2429	CLUST439
chrVII	842621	842622	-	0	0	0	0	0	0	SITE2434	CLUST440
chrVII	845631	845632	+	40213	57984	88499	15	26	21	SITE2443	CLUST441
chrVII	845632	845633	+	2757	0	0	3	0	0	SITE2444	CLUST441
chrVII	845633	845634	+	0	62	0	0	1	0	SITE2446	CLUST441
chrVII	845632	845633	-	0	0	0	0	0	0	SITE2447	CLUST441
chrVII	845634	845635	-	1741	2046	1374	4	4	6	SITE2449	CLUST441
chrVII	845635	845636	+	0	1087	0	0	2	0	SITE2450	CLUST441
chrVII	845635	845636	-	0	55	103	0	1	1	SITE2451	CLUST441
chrVII	845637	845638	+	0	4827	0	0	2	0	SITE2453	CLUST441
chrVII	845639	845640	+	0	0	15443	0	0	3	SITE2455	CLUST441
chrVII	845638	845639	-	0	0	0	0	0	0	SITE2456	CLUST441
chrVII	845640	845641	-	0	286	1453	0	2	2	SITE2457	CLUST441
chrVII	853842	853843	+	0	0	0	0	0	0	SITE2459	CLUST442
chrVII	855092	855093	+	472	0	0	1	0	0	SITE2460	CLUST443
chrVII	857496	857497	-	0	0	0	0	0	0	SITE2462	CLUST444
chrVII	857498	857499	+	0	0	10403	0	0	1	SITE2463	CLUST444
chrVII	857501	857502	+	0	0	12431	0	0	1	SITE2466	CLUST444
chrVII	857503	857504	+	69207	101129	136774	21	30	27	SITE2470	CLUST444
chrVII	857503	857504	-	0	0	0	0	0	0	SITE2473	CLUST444
chrVII	857504	857505	-	296	0	0	2	0	0	SITE2474	CLUST444
chrVII	857505	857506	-	0	5339	3858	0	2	1	SITE2475	CLUST444
chrVII	857506	857507	-	47961	35549	91555	17	25	27	SITE2476	CLUST444
chrVII	857507	857508	-	0	0	0	0	0	0	SITE2477	CLUST444
chrVII	857508	857509	-	0	0	0	0	0	0	SITE2478	CLUST444
chrVII	866995	866996	+	0	0	0	0	0	0	SITE2481	CLUST445
chrVII	876369	876370	+	0	312	0	0	1	0	SITE2484	CLUST446
chrVII	876372	876373	-	0	0	12981	0	0	2	SITE2487	CLUST446
chrVII	876377	876378	+	77463	48804	75770	20	28	18	SITE2489	CLUST446
chrVII	876379	876380	+	21795	0	0	1	0	0	SITE2491	CLUST446
chrVII	876380	876381	+	0	1185	0	0	1	0	SITE2492	CLUST446
chrVII	876379	876380	-	120	0	0	1	0	0	SITE2493	CLUST446
chrVII	876380	876381	-	73536	95697	114226	19	33	35	SITE2494	CLUST446
chrVII	876383	876384	-	0	405	447	0	1	1	SITE2497	CLUST446
chrVII	876385	876386	+	10116	0	0	1	0	0	SITE2498	CLUST446
chrVII	878220	878221	-	0	0	0	0	0	0	SITE2501	CLUST447
chrVII	878818	878819	+	0	0	0	0	0	0	SITE2502	CLUST448
chrVII	878820	878821	+	0	1552	0	0	1	0	SITE2503	CLUST448
chrVII	878821	878822	+	321	4512	6971	1	3	3	SITE2505	CLUST448
chrVII	878822	878823	+	35663	88931	79922	17	24	20	SITE2507	CLUST448
chrVII	878823	878824	+	0	25390	4650	0	3	2	SITE2508	CLUST448
chrVII	878824	878825	-	9653	0	1259	2	0	1	SITE2510	CLUST448
chrVII	878825	878826	-	14154	33529	32937	11	23	29	SITE2511	CLUST448
chrVII	878826	878827	-	0	0	0	0	0	0	SITE2512	CLUST448
chrVII	878827	878828	+	0	0	0	0	0	0	SITE2513	CLUST448
chrVII	881179	881180	+	0	0	0	0	0	0	SITE2515	CLUST449
chrVII	882765	882766	+	0	0	0	0	0	0	SITE2517	CLUST450
chrVII	896383	896384	+	0	0	0	0	0	0	SITE2520	CLUST451
chrVII	905141	905142	-	0	0	0	0	0	0	SITE2522	CLUST452
chrVII	916945	916946	-	4951	0	0	1	0	0	SITE2524	CLUST453
chrVII	931034	931035	+	32703	0	0	1	0	0	SITE2530	CLUST454
chrVII	931035	931036	+	18433	2377	18548	4	2	6	SITE2531	CLUST454
chrVII	931036	931037	+	115743	86260	138227	29	39	40	SITE2532	CLUST454
chrVII	931035	931036	-	0	0	7444	0	0	1	SITE2533	CLUST454
chrVII	931037	931038	+	30819	12805	17781	7	4	2	SITE2534	CLUST454
chrVII	931037	931038	-	176	0	418	1	0	1	SITE2536	CLUST454
chrVII	931038	931039	-	150	11883	4460	1	5	3	SITE2538	CLUST454
chrVII	931039	931040	-	82840	107893	179750	22	39	42	SITE2539	CLUST454
chrVII	931040	931041	-	37992	12766	13218	4	5	3	SITE2540	CLUST454
chrVII	931041	931042	+	0	0	796	0	0	1	SITE2541	CLUST454
chrVII	960084	960085	+	0	0	0	0	0	0	SITE2546	CLUST455
chrVII	960158	960159	+	0	0	15663	0	0	1	SITE2548	CLUST456
chrVII	972038	972039	-	0	0	0	0	0	0	SITE2549	CLUST457
chrVII	1000186	1000187	-	0	0	0	0	0	0	SITE2550	CLUST458
chrVII	1004201	1004202	+	11463	7309	6918	1	4	2	SITE2553	CLUST459
chrVII	1004202	1004203	+	506	2802	11322	1	2	2	SITE2554	CLUST459
chrVII	1004203	1004204	+	0	0	2525	0	0	2	SITE2555	CLUST459
chrVII	1004203	1004204	-	0	0	0	0	0	0	SITE2557	CLUST459
chrVII	1004204	1004205	-	13367	19291	18753	3	6	5	SITE2559	CLUST459
chrVII	1004205	1004206	-	0	0	4339	0	0	2	SITE2560	CLUST459
chrVII	1004206	1004207	+	0	0	0	0	0	0	SITE2561	CLUST459
chrVII	1004206	1004207	-	0	0	0	0	0	0	SITE2562	CLUST459
chrVII	1004208	1004209	-	0	0	0	0	0	0	SITE2564	CLUST459
chrVII	1004209	1004210	-	0	1731	0	0	1	0	SITE2565	CLUST459
chrVII	1004217	1004218	-	0	149	0	0	1	0	SITE2566	CLUST459
chrVII	1004219	1004220	+	0	0	0	0	0	0	SITE2567	CLUST459
chrVII	1004221	1004222	-	994	0	0	1	0	0	SITE2568	CLUST459
chrVII	1004234	1004235	+	0	2143	0	0	1	0	SITE2569	CLUST459
chrVII	1011294	1011295	+	0	8592	0	0	1	0	SITE2570	CLUST460
chrVII	1011465	1011466	-	0	0	0	0	0	0	SITE2572	CLUST461
chrVII	1014168	1014169	-	0	0	0	0	0	0	SITE2573	CLUST462
chrVII	1027608	1027609	+	0	0	0	0	0	0	SITE2576	CLUST463
chrVII	1055781	1055782	+	0	0	0	0	0	0	SITE2578	CLUST464
chrVII	1060729	1060730	-	0	0	0	0	0	0	SITE2581	CLUST465
chrVII	1079290	1079291	+	0	752	0	0	1	0	SITE2583	CLUST466
chrVIII	42430	42431	-	0	0	0	0	0	0	SITE2587	CLUST467
chrVIII	51571	51572	-	0	0	0	0	0	0	SITE2589	CLUST468
chrVIII	62738	62739	+	345	11399	40368	1	4	7	SITE2593	CLUST469
chrVIII	62739	62740	+	0	2421	921	0	1	1	SITE2594	CLUST469
chrVIII	62740	62741	+	35679	1995	3105	1	3	1	SITE2595	CLUST469
chrVIII	62739	62740	-	0	353	0	0	1	0	SITE2596	CLUST469
chrVIII	62740	62741	-	383	1342	0	1	2	0	SITE2597	CLUST469
chrVIII	62741	62742	+	0	1746	2015	0	1	1	SITE2598	CLUST469
chrVIII	62741	62742	-	7431	15827	7384	2	2	4	SITE2599	CLUST469
chrVIII	62742	62743	-	357	4684	9912	1	4	3	SITE2601	CLUST469
chrVIII	62743	62744	-	17813	4097	4662	4	2	4	SITE2603	CLUST469
chrVIII	62744	62745	-	2309	0	14216	1	0	2	SITE2604	CLUST469
chrVIII	69662	69663	+	0	0	9533	0	0	1	SITE2605	CLUST470
chrVIII	78627	78628	-	0	0	0	0	0	0	SITE2607	CLUST471
chrVIII	81040	81041	+	0	0	0	0	0	0	SITE2608	CLUST472
chrVIII	85386	85387	-	84650	67747	137947	33	33	32	SITE2613	CLUST473
chrVIII	85387	85388	-	0	5087	1528	0	3	1	SITE2614	CLUST473
chrVIII	85388	85389	-	272	933	10952	1	2	2	SITE2615	CLUST473
chrVIII	116187	116188	+	0	0	59	0	0	1	SITE2620	CLUST474
chrVIII	116188	116189	+	0	0	0	0	0	0	SITE2621	CLUST474
chrVIII	116189	116190	+	1121	4534	0	2	2	0	SITE2622	CLUST474
chrVIII	116190	116191	+	21835	38286	74942	7	16	16	SITE2623	CLUST474
chrVIII	116191	116192	+	75089	56136	23803	20	18	13	SITE2624	CLUST474
chrVIII	116192	116193	+	0	0	6412	0	0	2	SITE2626	CLUST474
chrVIII	116192	116193	-	0	6862	6198	0	2	1	SITE2627	CLUST474
chrVIII	116193	116194	-	28070	15727	36753	6	6	9	SITE2629	CLUST474
chrVIII	116194	116195	-	115046	37061	166051	22	14	17	SITE2630	CLUST474
chrVIII	116198	116199	+	258	3173	0	1	1	0	SITE2632	CLUST474
chrVIII	129480	129481	-	0	0	0	0	0	0	SITE2634	CLUST475
chrVIII	133114	133115	-	9222	0	0	1	0	0	SITE2635	CLUST476
chrVIII	133115	133116	+	0	0	9712	0	0	1	SITE2636	CLUST476
chrVIII	133118	133119	+	956	865	3339	1	1	3	SITE2638	CLUST476
chrVIII	133119	133120	+	46389	78141	92805	13	27	24	SITE2639	CLUST476
chrVIII	133121	133122	+	0	0	0	0	0	0	SITE2643	CLUST476
chrVIII	133121	133122	-	6835	2551	8368	2	3	2	SITE2644	CLUST476
chrVIII	133122	133123	+	0	0	156	0	0	1	SITE2645	CLUST476
chrVIII	133122	133123	-	42129	32959	113955	11	18	24	SITE2646	CLUST476
chrVIII	133125	133126	-	58	0	0	1	0	0	SITE2649	CLUST476
chrVIII	134305	134306	+	101856	90780	217848	24	36	45	SITE2652	CLUST477
chrVIII	134306	134307	+	0	111	0	0	1	0	SITE2653	CLUST477
chrVIII	134308	134309	-	76099	207887	216257	27	42	46	SITE2656	CLUST477
chrVIII	146329	146330	-	286216	108480	285585	21	23	33	SITE2672	CLUST478
chrVIII	146330	146331	-	591	680	0	1	1	0	SITE2673	CLUST478
chrVIII	146331	146332	-	12638	6832	1168	1	2	3	SITE2674	CLUST478
chrVIII	194276	194277	+	0	0	0	0	0	0	SITE2682	CLUST479
chrVIII	237941	237942	+	0	6111	0	0	1	0	SITE2688	CLUST480
chrVIII	237952	237953	+	162243	111100	111587	23	34	28	SITE2692	CLUST480
chrVIII	237953	237954	+	0	1742	0	0	1	0	SITE2693	CLUST480
chrVIII	237954	237955	+	0	8190	0	0	1	0	SITE2694	CLUST480
chrVIII	237955	237956	-	99919	26559	95765	26	17	20	SITE2698	CLUST480
chrVIII	237956	237957	+	0	0	3490	0	0	2	SITE2699	CLUST480
chrVIII	237957	237958	-	0	1939	0	0	1	0	SITE2701	CLUST480
chrVIII	242760	242761	+	0	0	0	0	0	0	SITE2704	CLUST481
chrVIII	330467	330468	+	0	0	0	0	0	0	SITE2717	CLUST482
chrVIII	339580	339581	-	0	0	0	0	0	0	SITE2721	CLUST483
chrVIII	339581	339582	-	0	0	0	0	0	0	SITE2722	CLUST483
chrVIII	339592	339593	-	0	0	0	0	0	0	SITE2728	CLUST483
chrVIII	344163	344164	+	0	0	0	0	0	0	SITE2732	CLUST484
chrVIII	358567	358568	+	0	0	0	0	0	0	SITE2734	CLUST485
chrVIII	358568	358569	+	204	0	0	1	0	0	SITE2735	CLUST485
chrVIII	358575	358576	+	0	0	12207	0	0	1	SITE2736	CLUST485
chrVIII	358580	358581	+	1414	1820	12898	2	2	5	SITE2739	CLUST485
chrVIII	358581	358582	+	4577	35062	24039	3	7	4	SITE2740	CLUST485
chrVIII	358582	358583	+	478	41600	61830	1	11	10	SITE2742	CLUST485
chrVIII	358583	358584	+	219	0	5338	1	0	1	SITE2744	CLUST485
chrVIII	358583	358584	-	22985	1093	815	2	1	1	SITE2745	CLUST485
chrVIII	358584	358585	+	3564	5648	21233	1	3	3	SITE2746	CLUST485
chrVIII	358584	358585	-	1422	4443	6135	1	3	3	SITE2747	CLUST485
chrVIII	358585	358586	-	3458	5351	30821	3	6	9	SITE2749	CLUST485
chrVIII	358586	358587	-	389	0	1722	1	0	1	SITE2750	CLUST485
chrVIII	358587	358588	-	0	0	14653	0	0	3	SITE2751	CLUST485
chrVIII	358590	358591	+	84	0	139	1	0	1	SITE2752	CLUST485
chrVIII	372439	372440	+	0	0	0	0	0	0	SITE2754	CLUST486
chrVIII	377071	377072	+	0	0	0	0	0	0	SITE2755	CLUST487
chrVIII	377271	377272	-	0	0	0	0	0	0	SITE2756	CLUST488
chrVIII	389001	389002	+	0	1301	0	0	1	0	SITE2758	CLUST489
chrVIII	389004	389005	+	0	7686	0	0	1	0	SITE2760	CLUST489
chrVIII	389006	389007	+	0	0	0	0	0	0	SITE2762	CLUST489
chrVIII	389007	389008	+	135033	134511	173123	26	44	35	SITE2763	CLUST489
chrVIII	389007	389008	-	0	0	0	0	0	0	SITE2764	CLUST489
chrVIII	389008	389009	+	0	706	4613	0	1	1	SITE2765	CLUST489
chrVIII	389009	389010	+	0	2989	863	0	1	1	SITE2766	CLUST489
chrVIII	389010	389011	-	129417	122861	76061	21	31	37	SITE2769	CLUST489
chrVIII	389011	389012	-	12911	0	0	1	0	0	SITE2770	CLUST489
chrVIII	389012	389013	-	70	0	0	1	0	0	SITE2771	CLUST489
chrVIII	389013	389014	-	1244	0	0	1	0	0	SITE2772	CLUST489
chrVIII	389018	389019	-	6288	1969	0	1	1	0	SITE2775	CLUST489
chrVIII	392814	392815	+	0	0	0	0	0	0	SITE2776	CLUST490
chrVIII	416243	416244	-	0	0	0	0	0	0	SITE2778	CLUST491
chrVIII	426214	426215	+	0	0	0	0	0	0	SITE2784	CLUST492
chrVIII	455141	455142	+	0	0	0	0	0	0	SITE2787	CLUST493
chrVIII	462817	462818	-	0	0	0	0	0	0	SITE2791	CLUST494
chrVIII	466973	466974	+	596	33670	21418	1	11	5	SITE2793	CLUST495
chrVIII	466974	466975	+	366	0	0	1	0	0	SITE2794	CLUST495
chrVIII	466975	466976	+	22281	34682	30462	5	9	7	SITE2795	CLUST495
chrVIII	466976	466977	+	33550	6939	6495	4	3	2	SITE2796	CLUST495
chrVIII	466975	466976	-	0	0	11619	0	0	1	SITE2797	CLUST495
chrVIII	466976	466977	-	36034	18799	35562	5	8	7	SITE2798	CLUST495
chrVIII	466977	466978	+	0	3192	11175	0	1	1	SITE2799	CLUST495
chrVIII	466978	466979	-	40480	61862	21138	4	15	9	SITE2802	CLUST495
chrVIII	466979	466980	-	0	15070	6185	0	3	2	SITE2803	CLUST495
chrVIII	466980	466981	-	0	0	2535	0	0	1	SITE2804	CLUST495
chrVIII	466984	466985	+	201	0	69	1	0	1	SITE2805	CLUST495
chrVIII	467023	467024	+	0	0	2435	0	0	1	SITE2809	CLUST496
chrVIII	475190	475191	-	0	0	0	0	0	0	SITE2810	CLUST497
chrVIII	475785	475786	+	0	0	71	0	0	1	SITE2812	CLUST498
chrVIII	475786	475787	+	0	3838	0	0	2	0	SITE2813	CLUST498
chrVIII	475787	475788	+	1234	7670	12118	5	3	6	SITE2814	CLUST498
chrVIII	475788	475789	+	552	0	0	1	0	0	SITE2815	CLUST498
chrVIII	475789	475790	+	5940	14430	24691	8	17	12	SITE2816	CLUST498
chrVIII	475788	475789	-	0	0	11858	0	0	1	SITE2817	CLUST498
chrVIII	475789	475790	-	0	22685	15585	0	2	3	SITE2818	CLUST498
chrVIII	475790	475791	+	0	0	658	0	0	1	SITE2819	CLUST498
chrVIII	475790	475791	-	735	11218	24170	2	5	5	SITE2820	CLUST498
chrVIII	475791	475792	+	0	0	0	0	0	0	SITE2821	CLUST498
chrVIII	475791	475792	-	0	3305	0	0	1	0	SITE2822	CLUST498
chrVIII	475792	475793	-	27540	61993	103819	4	22	23	SITE2823	CLUST498
chrVIII	475794	475795	-	557	0	0	1	0	0	SITE2825	CLUST498
chrVIII	475795	475796	-	0	629	0	0	1	0	SITE2826	CLUST498
chrVIII	475800	475801	+	0	1834	1936	0	1	2	SITE2827	CLUST498
chrVIII	475803	475804	-	0	0	0	0	0	0	SITE2828	CLUST498
chrVIII	506107	506108	-	0	6769	0	0	1	0	SITE2831	CLUST499
chrVIII	516589	516590	-	0	0	30762	0	0	1	SITE2835	CLUST500
chrVIII	526742	526743	+	0	0	0	0	0	0	SITE2838	CLUST501
chrIX	20800	20801	-	0	0	0	0	0	0	SITE2844	CLUST502
chrIX	33037	33038	-	0	0	0	0	0	0	SITE2846	CLUST503
chrIX	36395	36396	-	0	0	0	0	0	0	SITE2847	CLUST504
chrIX	83413	83414	+	0	0	0	0	0	0	SITE2850	CLUST505
chrIX	104220	104221	+	0	0	0	0	0	0	SITE2852	CLUST506
chrIX	107003	107004	-	0	0	0	0	0	0	SITE2853	CLUST507
chrIX	117278	117279	+	0	0	0	0	0	0	SITE2855	CLUST508
chrIX	121889	121890	-	0	113	0	0	1	0	SITE2856	CLUST509
chrIX	126094	126095	+	0	0	0	0	0	0	SITE2858	CLUST510
chrIX	127681	127682	+	0	0	0	0	0	0	SITE2859	CLUST511
chrIX	150020	150021	-	0	0	0	0	0	0	SITE2862	CLUST512
chrIX	150364	150365	+	0	0	0	0	0	0	SITE2863	CLUST513
chrIX	173786	173787	+	559	73	0	1	1	0	SITE2864	CLUST514
chrIX	175010	175011	+	0	6346	0	0	1	0	SITE2865	CLUST515
chrIX	175011	175012	+	0	0	7029	0	0	1	SITE2866	CLUST515
chrIX	175015	175016	+	151065	107579	189155	19	28	28	SITE2870	CLUST515
chrIX	175016	175017	+	3648	1899	11491	1	1	2	SITE2871	CLUST515
chrIX	175019	175020	+	0	0	14533	0	0	1	SITE2874	CLUST515
chrIX	175018	175019	-	137191	120679	170592	24	29	32	SITE2875	CLUST515
chrIX	175019	175020	-	0	0	7397	0	0	2	SITE2876	CLUST515
chrIX	175020	175021	-	0	3822	0	0	1	0	SITE2877	CLUST515
chrIX	183523	183524	+	0	1982	2589	0	2	1	SITE2882	CLUST516
chrIX	183525	183526	+	33522	40803	48795	11	15	11	SITE2883	CLUST516
chrIX	183526	183527	+	12586	474	2799	3	1	1	SITE2884	CLUST516
chrIX	183526	183527	-	0	0	11043	0	0	1	SITE2886	CLUST516
chrIX	183527	183528	-	0	93	0	0	1	0	SITE2888	CLUST516
chrIX	183528	183529	-	24046	24905	52116	11	13	8	SITE2889	CLUST516
chrIX	183529	183530	-	0	149	6593	0	1	2	SITE2890	CLUST516
chrIX	197570	197571	+	0	0	2496	0	0	1	SITE2891	CLUST517
chrIX	197569	197570	-	0	928	0	0	1	0	SITE2892	CLUST517
chrIX	197573	197574	-	0	0	0	0	0	0	SITE2894	CLUST517
chrIX	197575	197576	+	85389	41086	34757	12	9	12	SITE2895	CLUST517
chrIX	197576	197577	+	718	21685	24467	1	3	4	SITE2896	CLUST517
chrIX	197578	197579	-	55691	89256	34070	16	24	9	SITE2899	CLUST517
chrIX	197579	197580	-	22991	2306	0	4	3	0	SITE2900	CLUST517
chrIX	197580	197581	+	0	6304	0	0	1	0	SITE2901	CLUST517
chrIX	197583	197584	-	427	0	0	1	0	0	SITE2905	CLUST517
chrIX	197592	197593	-	0	2486	0	0	1	0	SITE2906	CLUST517
chrIX	205560	205561	+	2296	15464	19741	3	3	2	SITE2918	CLUST518
chrIX	206528	206529	+	0	0	0	0	0	0	SITE2930	CLUST519
chrIX	206529	206530	+	0	0	0	0	0	0	SITE2931	CLUST519
chrIX	206979	206980	+	0	0	0	0	0	0	SITE2939	CLUST520
chrIX	206980	206981	+	0	0	1422	0	0	1	SITE2940	CLUST520
chrIX	207021	207022	+	104	0	0	1	0	0	SITE2943	CLUST520
chrIX	207123	207124	-	0	0	0	0	0	0	SITE2946	CLUST521
chrIX	207692	207693	-	854	7055	0	1	2	0	SITE2952	CLUST522
chrIX	207725	207726	+	0	0	0	0	0	0	SITE2954	CLUST522
chrIX	210646	210647	+	11760	0	5997	1	0	1	SITE2976	CLUST523
chrIX	210647	210648	+	0	2965	8032	0	1	1	SITE2977	CLUST523
chrIX	210648	210649	+	50687	38891	101921	13	17	20	SITE2978	CLUST523
chrIX	210650	210651	+	0	0	0	0	0	0	SITE2980	CLUST523
chrIX	212019	212020	-	0	0	0	0	0	0	SITE2983	CLUST524
chrIX	226415	226416	-	0	0	0	0	0	0	SITE2984	CLUST525
chrIX	231755	231756	+	0	0	0	0	0	0	SITE2985	CLUST526
chrIX	241092	241093	-	0	0	0	0	0	0	SITE2986	CLUST527
chrIX	248823	248824	+	0	0	4496	0	0	1	SITE2988	CLUST528
chrIX	248831	248832	+	1325	3863	0	1	2	0	SITE2989	CLUST528
chrIX	248832	248833	+	352	0	0	1	0	0	SITE2990	CLUST528
chrIX	248833	248834	+	33425	23394	24298	10	17	13	SITE2991	CLUST528
chrIX	248834	248835	+	10596	25290	27819	7	10	9	SITE2992	CLUST528
chrIX	248834	248835	-	0	7648	0	0	1	0	SITE2994	CLUST528
chrIX	248835	248836	+	24910	17700	14340	11	8	7	SITE2995	CLUST528
chrIX	248836	248837	+	2971	1678	1326	2	2	1	SITE2996	CLUST528
chrIX	248835	248836	-	25546	12575	0	1	1	0	SITE2997	CLUST528
chrIX	248836	248837	-	7215	73538	58261	6	13	9	SITE2998	CLUST528
chrIX	248837	248838	+	0	2191	695	0	1	1	SITE2999	CLUST528
chrIX	248838	248839	+	8472	198	505	1	2	1	SITE3000	CLUST528
chrIX	248837	248838	-	45193	9719	139899	9	8	13	SITE3001	CLUST528
chrIX	248838	248839	-	114986	29627	92078	12	9	13	SITE3002	CLUST528
chrIX	248839	248840	+	1606	1321	3756	1	1	1	SITE3003	CLUST528
chrIX	248839	248840	-	355	4841	1428	1	3	1	SITE3004	CLUST528
chrIX	248840	248841	-	0	20691	0	0	5	0	SITE3006	CLUST528
chrIX	248841	248842	-	117	3964	8348	1	1	2	SITE3007	CLUST528
chrIX	248852	248853	+	0	2208	0	0	1	0	SITE3009	CLUST528
chrIX	300309	300310	+	5490	3974	0	4	1	0	SITE3013	CLUST529
chrIX	300310	300311	+	4208	0	2173	1	0	1	SITE3014	CLUST529
chrIX	300311	300312	+	21603	43531	76886	10	15	18	SITE3015	CLUST529
chrIX	300312	300313	-	17054	19437	6620	2	3	2	SITE3018	CLUST529
chrIX	300313	300314	-	0	0	4897	0	0	1	SITE3019	CLUST529
chrIX	300314	300315	-	76454	76205	101325	12	16	14	SITE3020	CLUST529
chrIX	300323	300324	-	0	84	0	0	1	0	SITE3023	CLUST529
chrIX	324383	324384	+	0	0	858	0	0	1	SITE3025	CLUST530
chrIX	324385	324386	+	0	6564	2018	0	1	1	SITE3027	CLUST530
chrIX	324386	324387	+	72141	42429	153532	11	19	21	SITE3028	CLUST530
chrIX	324387	324388	+	8476	21426	55880	4	5	9	SITE3030	CLUST530
chrIX	324386	324387	-	0	319	1300	0	1	2	SITE3031	CLUST530
chrIX	324388	324389	+	0	4335	2917	0	1	1	SITE3032	CLUST530
chrIX	324388	324389	-	28185	0	8435	2	0	3	SITE3034	CLUST530
chrIX	324389	324390	-	51467	40732	103512	13	17	18	SITE3036	CLUST530
chrIX	324390	324391	-	28645	11337	36630	6	7	9	SITE3037	CLUST530
chrIX	324392	324393	+	0	20241	0	0	1	0	SITE3038	CLUST530
chrIX	324735	324736	+	0	0	0	0	0	0	SITE3045	CLUST531
chrIX	325729	325730	+	182	0	0	1	0	0	SITE3046	CLUST532
chrIX	325730	325731	+	0	660	0	0	1	0	SITE3047	CLUST532
chrIX	325731	325732	+	15314	6082	16534	3	3	6	SITE3048	CLUST532
chrIX	325732	325733	+	5530	44390	31919	4	7	5	SITE3049	CLUST532
chrIX	325733	325734	+	0	0	3103	0	0	1	SITE3050	CLUST532
chrIX	325733	325734	-	0	11423	0	0	2	0	SITE3051	CLUST532
chrIX	325734	325735	+	0	3400	0	0	1	0	SITE3052	CLUST532
chrIX	325734	325735	-	239	7594	40415	1	4	8	SITE3053	CLUST532
chrIX	325735	325736	-	26492	37404	51665	3	11	12	SITE3055	CLUST532
chrIX	325736	325737	-	0	0	0	0	0	0	SITE3056	CLUST532
chrIX	325737	325738	-	0	890	0	0	1	0	SITE3057	CLUST532
chrIX	325739	325740	+	0	3656	0	0	1	0	SITE3059	CLUST532
chrIX	325739	325740	-	0	5475	0	0	1	0	SITE3060	CLUST532
chrIX	325740	325741	-	0	0	0	0	0	0	SITE3061	CLUST532
chrIX	336426	336427	+	0	0	0	0	0	0	SITE3063	CLUST533
chrIX	336431	336432	+	8078	155	3450	1	1	2	SITE3064	CLUST533
chrIX	336432	336433	+	15733	1251	0	1	1	0	SITE3065	CLUST533
chrIX	336433	336434	+	12005	0	316	4	0	1	SITE3066	CLUST533
chrIX	336434	336435	+	0	0	7181	0	0	2	SITE3067	CLUST533
chrIX	336434	336435	-	0	0	13791	0	0	1	SITE3069	CLUST533
chrIX	336436	336437	-	0	1750	1372	0	2	1	SITE3072	CLUST533
chrIX	358851	358852	+	0	0	0	0	0	0	SITE3075	CLUST534
chrIX	368220	368221	+	0	0	0	0	0	0	SITE3076	CLUST535
chrIX	370399	370400	+	0	1851	2491	0	1	3	SITE3080	CLUST536
chrIX	370400	370401	+	55888	36456	62192	13	19	19	SITE3081	CLUST536
chrIX	370402	370403	+	0	3919	13950	0	1	1	SITE3083	CLUST536
chrIX	370401	370402	-	0	0	0	0	0	0	SITE3084	CLUST536
chrIX	370404	370405	+	0	884	0	0	1	0	SITE3086	CLUST536
chrIX	370403	370404	-	52156	60591	71347	17	27	24	SITE3087	CLUST536
chrIX	370405	370406	+	0	0	0	0	0	0	SITE3089	CLUST536
chrIX	370405	370406	-	0	717	5417	0	1	2	SITE3090	CLUST536
chrIX	370406	370407	+	0	1792	0	0	1	0	SITE3091	CLUST536
chrIX	370406	370407	-	3799	0	0	2	0	0	SITE3092	CLUST536
chrIX	372094	372095	+	0	0	0	0	0	0	SITE3093	CLUST537
chrIX	377439	377440	+	0	0	0	0	0	0	SITE3094	CLUST538
chrIX	380185	380186	+	0	0	0	0	0	0	SITE3095	CLUST539
chrIX	387729	387730	-	0	0	0	0	0	0	SITE3097	CLUST540
chrIX	397755	397756	+	0	0	0	0	0	0	SITE3098	CLUST541
chrIX	433783	433784	+	0	0	0	0	0	0	SITE3102	CLUST542
chrX	23931	23932	-	0	0	0	0	0	0	SITE3106	CLUST543
chrX	43033	43034	+	0	0	0	0	0	0	SITE3107	CLUST544
chrX	59174	59175	+	710	0	0	1	0	0	SITE3108	CLUST545
chrX	59177	59178	-	0	0	793	0	0	1	SITE3109	CLUST545
chrX	59183	59184	+	0	2566	6381	0	1	1	SITE3112	CLUST545
chrX	59184	59185	+	46368	163078	328604	20	38	51	SITE3113	CLUST545
chrX	59186	59187	-	4598	0	0	1	0	0	SITE3117	CLUST545
chrX	59187	59188	-	26450	43346	44080	18	23	26	SITE3118	CLUST545
chrX	80543	80544	+	0	0	0	0	0	0	SITE3122	CLUST546
chrX	95309	95310	+	0	0	0	0	0	0	SITE3125	CLUST547
chrX	116020	116021	+	0	15314	0	0	1	0	SITE3133	CLUST548
chrX	116021	116022	-	0	0	4201	0	0	1	SITE3136	CLUST548
chrX	116022	116023	+	0	0	291	0	0	1	SITE3137	CLUST548
chrX	116023	116024	+	41023	59164	76334	7	20	13	SITE3138	CLUST548
chrX	116023	116024	-	472	0	0	1	0	0	SITE3139	CLUST548
chrX	116025	116026	-	0	0	11014	0	0	1	SITE3143	CLUST548
chrX	116026	116027	-	28358	46485	72279	7	12	14	SITE3144	CLUST548
chrX	118885	118886	+	0	0	0	0	0	0	SITE3146	CLUST549
chrX	127469	127470	-	0	0	0	0	0	0	SITE3147	CLUST550
chrX	134142	134143	-	0	0	79	0	0	1	SITE3154	CLUST551
chrX	145970	145971	+	0	0	0	0	0	0	SITE3156	CLUST552
chrX	146287	146288	-	0	0	0	0	0	0	SITE3157	CLUST553
chrX	160190	160191	-	0	0	0	0	0	0	SITE3158	CLUST554
chrX	168682	168683	+	0	0	0	0	0	0	SITE3159	CLUST555
chrX	197394	197395	-	0	7123	0	0	1	0	SITE3164	CLUST556
chrX	197395	197396	+	10072	7007	58574	3	3	6	SITE3165	CLUST556
chrX	197396	197397	+	32368	4688	25704	3	1	7	SITE3166	CLUST556
chrX	197397	197398	+	3458	12322	57004	3	10	6	SITE3167	CLUST556
chrX	197398	197399	+	0	0	0	0	0	0	SITE3170	CLUST556
chrX	197399	197400	+	0	846	0	0	1	0	SITE3171	CLUST556
chrX	197398	197399	-	30181	7344	1850	9	4	1	SITE3172	CLUST556
chrX	197399	197400	-	3629	12201	4187	4	4	4	SITE3173	CLUST556
chrX	197400	197401	-	16298	11244	43889	10	4	9	SITE3174	CLUST556
chrX	197401	197402	-	13760	0	8601	1	0	2	SITE3175	CLUST556
chrX	204717	204718	+	81	0	5928	1	0	2	SITE3180	CLUST557
chrX	204718	204719	+	246	6437	9912	1	2	1	SITE3181	CLUST557
chrX	204719	204720	+	35132	85170	103630	5	16	15	SITE3182	CLUST557
chrX	204720	204721	+	609	1119	22580	1	2	6	SITE3183	CLUST557
chrX	204720	204721	-	16295	0	0	2	0	0	SITE3185	CLUST557
chrX	204721	204722	+	0	0	60176	0	0	7	SITE3186	CLUST557
chrX	204721	204722	-	0	10265	576	0	3	2	SITE3188	CLUST557
chrX	204723	204724	+	6429	1913	0	1	1	0	SITE3189	CLUST557
chrX	204722	204723	-	8832	43378	42836	4	7	12	SITE3190	CLUST557
chrX	204723	204724	-	47299	14111	25217	9	8	8	SITE3191	CLUST557
chrX	204724	204725	-	4586	0	0	1	0	0	SITE3193	CLUST557
chrX	204725	204726	+	0	0	0	0	0	0	SITE3194	CLUST557
chrX	204725	204726	-	0	0	822	0	0	1	SITE3195	CLUST557
chrX	204726	204727	-	831	388	2096	2	2	1	SITE3197	CLUST557
chrX	204727	204728	+	0	5539	0	0	1	0	SITE3198	CLUST557
chrX	204727	204728	-	9410	0	0	1	0	0	SITE3199	CLUST557
chrX	204728	204729	-	0	0	0	0	0	0	SITE3201	CLUST557
chrX	222152	222153	+	0	0	0	0	0	0	SITE3203	CLUST558
chrX	233923	233924	+	119838	57102	109388	15	22	23	SITE3207	CLUST559
chrX	233924	233925	+	0	201	0	0	2	0	SITE3208	CLUST559
chrX	233925	233926	+	0	0	0	0	0	0	SITE3209	CLUST559
chrX	233926	233927	-	49912	55068	60764	14	22	23	SITE3212	CLUST559
chrX	233927	233928	+	0	0	0	0	0	0	SITE3213	CLUST559
chrX	233927	233928	-	326	28259	2280	1	3	1	SITE3214	CLUST559
chrX	233928	233929	-	0	0	13815	0	0	2	SITE3216	CLUST559
chrX	233930	233931	-	616	2129	0	1	1	0	SITE3217	CLUST559
chrX	236765	236766	+	0	0	0	0	0	0	SITE3219	CLUST560
chrX	283188	283189	-	0	0	0	0	0	0	SITE3222	CLUST561
chrX	286597	286598	-	0	0	0	0	0	0	SITE3224	CLUST562
chrX	313543	313544	+	0	0	0	0	0	0	SITE3225	CLUST563
chrX	319758	319759	-	0	0	0	0	0	0	SITE3234	CLUST564
chrX	349663	349664	+	0	0	0	0	0	0	SITE3238	CLUST565
chrX	354226	354227	+	0	0	0	0	0	0	SITE3240	CLUST566
chrX	354227	354228	+	26381	48791	52268	10	20	13	SITE3241	CLUST566
chrX	354229	354230	+	0	2745	0	0	1	0	SITE3243	CLUST566
chrX	354229	354230	-	61	1795	1647	1	1	2	SITE3245	CLUST566
chrX	354230	354231	-	78987	59365	155515	16	18	32	SITE3246	CLUST566
chrX	354232	354233	+	1019	3679	89	1	1	1	SITE3248	CLUST566
chrX	354232	354233	-	0	0	4711	0	0	1	SITE3249	CLUST566
chrX	355357	355358	+	0	0	0	0	0	0	SITE3253	CLUST567
chrX	355358	355359	+	41682	6109	103464	6	4	10	SITE3254	CLUST567
chrX	355361	355362	-	50359	57254	58588	7	11	17	SITE3259	CLUST567
chrX	355362	355363	-	0	0	6807	0	0	2	SITE3261	CLUST567
chrX	355366	355367	-	0	0	11159	0	0	1	SITE3264	CLUST567
chrX	355368	355369	-	0	0	2110	0	0	1	SITE3266	CLUST567
chrX	355439	355440	+	0	0	0	0	0	0	SITE3268	CLUST568
chrX	355440	355441	+	7027	4625	4682	1	2	2	SITE3269	CLUST568
chrX	355442	355443	-	0	0	0	0	0	0	SITE3271	CLUST568
chrX	355443	355444	-	7879	0	0	1	0	0	SITE3272	CLUST568
chrX	360823	360824	-	0	0	0	0	0	0	SITE3275	CLUST569
chrX	363559	363560	-	0	0	0	0	0	0	SITE3276	CLUST570
chrX	367775	367776	+	0	0	0	0	0	0	SITE3277	CLUST571
chrX	374509	374510	-	0	0	8891	0	0	1	SITE3282	CLUST572
chrX	374510	374511	-	0	2766	0	0	1	0	SITE3283	CLUST572
chrX	374586	374587	+	279	350	416	1	1	2	SITE3288	CLUST573
chrX	374587	374588	+	0	3758	0	0	1	0	SITE3289	CLUST573
chrX	374588	374589	+	0	4790	10241	0	1	1	SITE3290	CLUST573
chrX	374588	374589	-	0	10314	0	0	1	0	SITE3292	CLUST573
chrX	374589	374590	+	39212	35016	93371	13	11	13	SITE3293	CLUST573
chrX	374590	374591	+	4655	22360	1392	2	9	1	SITE3294	CLUST573
chrX	374590	374591	-	0	8594	0	0	1	0	SITE3295	CLUST573
chrX	374592	374593	-	29524	54249	139172	5	19	22	SITE3299	CLUST573
chrX	374593	374594	-	395	0	17800	1	0	2	SITE3300	CLUST573
chrX	374595	374596	+	0	0	0	0	0	0	SITE3301	CLUST573
chrX	378344	378345	+	19048	50104	37665	7	12	8	SITE3303	CLUST574
chrX	378346	378347	+	0	0	1949	0	0	1	SITE3305	CLUST574
chrX	378346	378347	-	0	0	574	0	0	1	SITE3307	CLUST574
chrX	378347	378348	-	63214	45972	118969	10	15	24	SITE3308	CLUST574
chrX	378348	378349	-	4536	0	0	2	0	0	SITE3309	CLUST574
chrX	378349	378350	-	17896	0	0	1	0	0	SITE3310	CLUST574
chrX	391111	391112	+	875	196	55	1	1	1	SITE3312	CLUST575
chrX	391117	391118	+	895	10670	0	1	1	0	SITE3313	CLUST575
chrX	391122	391123	+	0	0	0	0	0	0	SITE3315	CLUST575
chrX	391123	391124	+	0	1416	0	0	1	0	SITE3316	CLUST575
chrX	391126	391127	+	0	1519	0	0	1	0	SITE3317	CLUST575
chrX	391125	391126	-	1127	979	0	1	1	0	SITE3318	CLUST575
chrX	391127	391128	+	352	12939	2382	2	7	3	SITE3319	CLUST575
chrX	391126	391127	-	0	0	0	0	0	0	SITE3320	CLUST575
chrX	391128	391129	+	6177	16176	8050	3	8	5	SITE3321	CLUST575
chrX	391128	391129	-	0	2695	0	0	1	0	SITE3322	CLUST575
chrX	391129	391130	-	20912	4774	0	1	1	0	SITE3324	CLUST575
chrX	391130	391131	-	197	4740	102653	1	2	18	SITE3325	CLUST575
chrX	391131	391132	-	14657	7795	33003	3	4	8	SITE3326	CLUST575
chrX	391132	391133	-	0	0	1398	0	0	1	SITE3327	CLUST575
chrX	393326	393327	+	0	0	0	0	0	0	SITE3329	CLUST576
chrX	396807	396808	+	569	1392	0	1	1	0	SITE3332	CLUST577
chrX	396808	396809	+	1599	0	5397	2	0	3	SITE3333	CLUST577
chrX	396809	396810	+	1847	1551	9148	2	1	7	SITE3334	CLUST577
chrX	396808	396809	-	0	0	0	0	0	0	SITE3335	CLUST577
chrX	396810	396811	+	6898	211	6838	2	2	4	SITE3337	CLUST577
chrX	396810	396811	-	211	1048	0	1	1	0	SITE3338	CLUST577
chrX	396811	396812	-	10633	1572	14967	2	2	4	SITE3340	CLUST577
chrX	396812	396813	-	1315	4784	16798	4	4	9	SITE3341	CLUST577
chrX	396813	396814	-	101	3526	9659	1	2	3	SITE3342	CLUST577
chrX	396814	396815	-	0	0	827	0	0	1	SITE3343	CLUST577
chrX	403928	403929	-	0	0	0	0	0	0	SITE3344	CLUST578
chrX	414944	414945	-	0	3014	0	0	1	0	SITE3346	CLUST579
chrX	414950	414951	+	943	0	0	1	0	0	SITE3347	CLUST579
chrX	414951	414952	+	14562	11047	20482	2	5	4	SITE3348	CLUST579
chrX	414952	414953	+	0	0	12080	0	0	1	SITE3349	CLUST579
chrX	414953	414954	+	0	0	3119	0	0	1	SITE3350	CLUST579
chrX	414953	414954	-	16721	364	3728	1	1	2	SITE3352	CLUST579
chrX	414954	414955	-	3797	6159	11446	3	4	4	SITE3353	CLUST579
chrX	416046	416047	+	2067	2959	11181	2	1	3	SITE3357	CLUST580
chrX	416047	416048	+	31776	59591	90515	11	15	16	SITE3358	CLUST580
chrX	416047	416048	-	0	2701	0	0	1	0	SITE3360	CLUST580
chrX	416049	416050	-	319	5866	0	2	1	0	SITE3363	CLUST580
chrX	416050	416051	-	66245	22069	45214	11	13	13	SITE3364	CLUST580
chrX	422916	422917	+	0	0	105	0	0	1	SITE3368	CLUST581
chrX	422918	422919	+	730	10806	13256	1	3	3	SITE3370	CLUST581
chrX	422921	422922	+	8953	22600	0	2	5	0	SITE3373	CLUST581
chrX	422922	422923	+	49439	6867	19813	9	3	6	SITE3375	CLUST581
chrX	422921	422922	-	0	4767	14319	0	2	4	SITE3376	CLUST581
chrX	422923	422924	+	477	7192	0	1	2	0	SITE3377	CLUST581
chrX	422922	422923	-	0	257	0	0	1	0	SITE3378	CLUST581
chrX	422924	422925	+	0	0	58	0	0	1	SITE3379	CLUST581
chrX	422924	422925	-	289	7600	12135	2	3	7	SITE3381	CLUST581
chrX	422925	422926	-	16095	14305	31206	5	4	4	SITE3382	CLUST581
chrX	422926	422927	-	362	3751	0	1	1	0	SITE3383	CLUST581
chrX	422943	422944	-	0	3221	0	0	1	0	SITE3387	CLUST581
chrX	424523	424524	+	0	0	18755	0	0	1	SITE3390	CLUST582
chrX	424525	424526	+	2364	28010	25220	3	6	7	SITE3393	CLUST582
chrX	424526	424527	+	19804	20909	25067	3	6	7	SITE3395	CLUST582
chrX	424527	424528	+	20017	42182	77443	13	9	10	SITE3396	CLUST582
chrX	424526	424527	-	0	0	0	0	0	0	SITE3397	CLUST582
chrX	424528	424529	-	262	18123	7826	1	2	5	SITE3400	CLUST582
chrX	424529	424530	-	516	12648	278	2	2	1	SITE3401	CLUST582
chrX	424530	424531	-	44217	33395	37596	7	14	9	SITE3402	CLUST582
chrX	434954	434955	+	0	0	0	0	0	0	SITE3409	CLUST583
chrX	463096	463097	-	0	0	0	0	0	0	SITE3410	CLUST584
chrX	463499	463500	+	0	0	0	0	0	0	SITE3411	CLUST585
chrX	499196	499197	-	0	0	0	0	0	0	SITE3415	CLUST586
chrX	511110	511111	+	0	0	0	0	0	0	SITE3416	CLUST587
chrX	517892	517893	-	0	0	0	0	0	0	SITE3418	CLUST588
chrX	517896	517897	+	124755	34154	57624	16	9	13	SITE3421	CLUST588
chrX	517899	517900	-	26283	31321	65846	7	11	16	SITE3426	CLUST588
chrX	519359	519360	-	0	0	3448	0	0	1	SITE3429	CLUST589
chrX	522992	522993	-	0	0	0	0	0	0	SITE3431	CLUST590
chrX	524099	524100	+	0	5292	0	0	1	0	SITE3432	CLUST591
chrX	524100	524101	+	0	0	0	0	0	0	SITE3433	CLUST591
chrX	524103	524104	-	0	0	23146	0	0	1	SITE3436	CLUST591
chrX	524104	524105	-	0	2749	0	0	1	0	SITE3438	CLUST591
chrX	524105	524106	+	95309	93877	89637	17	20	14	SITE3439	CLUST591
chrX	524106	524107	+	13244	22100	25075	1	2	3	SITE3440	CLUST591
chrX	524108	524109	-	91767	69676	82378	16	23	18	SITE3444	CLUST591
chrX	524109	524110	-	11779	1795	12292	2	2	2	SITE3445	CLUST591
chrX	524110	524111	-	5866	191	2297	2	1	1	SITE3446	CLUST591
chrX	526992	526993	+	0	0	0	0	0	0	SITE3447	CLUST592
chrX	531806	531807	-	0	0	2399	0	0	1	SITE3451	CLUST593
chrX	531808	531809	+	0	0	0	0	0	0	SITE3452	CLUST593
chrX	531809	531810	+	0	0	19811	0	0	3	SITE3453	CLUST593
chrX	531811	531812	+	91768	40870	79031	21	25	23	SITE3455	CLUST593
chrX	531811	531812	-	0	0	5155	0	0	1	SITE3456	CLUST593
chrX	531812	531813	+	0	697	5738	0	1	1	SITE3457	CLUST593
chrX	531812	531813	-	0	169	5497	0	1	2	SITE3458	CLUST593
chrX	531813	531814	+	216	324	24366	1	1	2	SITE3459	CLUST593
chrX	531813	531814	-	0	0	1552	0	0	1	SITE3460	CLUST593
chrX	531814	531815	+	74	0	0	1	0	0	SITE3461	CLUST593
chrX	531815	531816	+	0	0	0	0	0	0	SITE3462	CLUST593
chrX	531814	531815	-	19122	37743	27895	8	18	8	SITE3463	CLUST593
chrX	531815	531816	-	0	142	20172	0	1	2	SITE3464	CLUST593
chrX	531816	531817	-	0	242	685	0	1	1	SITE3465	CLUST593
chrX	531818	531819	+	0	0	0	0	0	0	SITE3466	CLUST593
chrX	531818	531819	-	228	0	242	1	0	1	SITE3468	CLUST593
chrX	531821	531822	-	0	2131	0	0	1	0	SITE3469	CLUST593
chrX	538540	538541	+	9827	40681	42942	6	10	13	SITE3473	CLUST594
chrX	538541	538542	+	15937	39745	37244	9	13	7	SITE3474	CLUST594
chrX	538542	538543	+	17615	15219	13842	4	5	4	SITE3475	CLUST594
chrX	538542	538543	-	148	0	0	1	0	0	SITE3476	CLUST594
chrX	538543	538544	+	0	0	4259	0	0	1	SITE3477	CLUST594
chrX	538543	538544	-	11079	28822	59155	4	7	14	SITE3478	CLUST594
chrX	538544	538545	-	54262	16845	23342	7	8	5	SITE3479	CLUST594
chrX	538545	538546	-	18405	32419	31077	3	8	5	SITE3480	CLUST594
chrX	541491	541492	+	10791	26294	25980	4	9	4	SITE3483	CLUST595
chrX	541493	541494	+	13414	8980	44066	4	3	4	SITE3486	CLUST595
chrX	541494	541495	-	6376	44194	55769	6	13	16	SITE3489	CLUST595
chrX	541496	541497	+	0	0	1598	0	0	1	SITE3490	CLUST595
chrX	541496	541497	-	19859	8559	28264	5	5	8	SITE3492	CLUST595
chrX	541500	541501	-	0	3119	0	0	1	0	SITE3493	CLUST595
chrX	543049	543050	-	0	0	0	0	0	0	SITE3494	CLUST596
chrX	543054	543055	+	0	0	34636	0	0	1	SITE3495	CLUST596
chrX	543056	543057	+	0	0	625	0	0	1	SITE3497	CLUST596
chrX	543057	543058	+	49508	62283	131269	11	19	25	SITE3499	CLUST596
chrX	543058	543059	+	0	0	0	0	0	0	SITE3500	CLUST596
chrX	543059	543060	+	0	0	2596	0	0	1	SITE3502	CLUST596
chrX	543059	543060	-	3827	0	0	1	0	0	SITE3503	CLUST596
chrX	543060	543061	-	57704	43189	76796	12	19	19	SITE3504	CLUST596
chrX	543062	543063	-	0	0	0	0	0	0	SITE3506	CLUST596
chrX	543068	543069	+	0	0	6116	0	0	1	SITE3507	CLUST596
chrX	543071	543072	-	0	0	0	0	0	0	SITE3508	CLUST596
chrX	545665	545666	-	0	0	0	0	0	0	SITE3509	CLUST597
chrX	594516	594517	-	0	0	0	0	0	0	SITE3513	CLUST598
chrX	612179	612180	-	0	0	0	0	0	0	SITE3515	CLUST599
chrX	617902	617903	+	67	0	1186	1	0	1	SITE3520	CLUST600
chrX	617903	617904	+	89601	55322	136843	25	18	27	SITE3521	CLUST600
chrX	617904	617905	+	42724	32378	43573	14	15	18	SITE3522	CLUST600
chrX	617905	617906	-	0	0	55	0	0	1	SITE3524	CLUST600
chrX	617906	617907	+	0	0	3396	0	0	1	SITE3525	CLUST600
chrX	617906	617907	-	74632	48754	154132	10	17	29	SITE3526	CLUST600
chrX	617907	617908	-	39188	93729	169635	12	25	23	SITE3527	CLUST600
chrX	617908	617909	+	0	0	8690	0	0	1	SITE3528	CLUST600
chrX	617909	617910	-	0	0	0	0	0	0	SITE3530	CLUST600
chrX	617921	617922	-	0	7269	0	0	1	0	SITE3532	CLUST600
chrX	643992	643993	-	0	0	0	0	0	0	SITE3535	CLUST601
chrX	686620	686621	-	0	0	120	0	0	1	SITE3539	CLUST602
chrX	695550	695551	-	0	0	0	0	0	0	SITE3540	CLUST603
chrX	727046	727047	-	0	0	0	0	0	0	SITE3543	CLUST604
chrX	728288	728289	-	0	0	0	0	0	0	SITE3545	CLUST605
chrXI	39304	39305	-	0	0	0	0	0	0	SITE3551	CLUST606
chrXI	41011	41012	+	0	0	0	0	0	0	SITE3552	CLUST607
chrXI	46820	46821	+	242169	174317	161999	45	57	48	SITE3557	CLUST608
chrXI	46822	46823	+	0	0	81	0	0	1	SITE3561	CLUST608
chrXI	46823	46824	-	15045	85413	54722	35	43	40	SITE3563	CLUST608
chrXI	46828	46829	-	0	4642	0	0	1	0	SITE3565	CLUST608
chrXI	74607	74608	+	0	0	4670	0	0	2	SITE3566	CLUST609
chrXI	74608	74609	+	27743	62425	98332	16	31	27	SITE3567	CLUST609
chrXI	74610	74611	+	28614	4913	0	3	3	0	SITE3569	CLUST609
chrXI	74611	74612	+	634	0	0	1	0	0	SITE3571	CLUST609
[truncated: 1,395 more rows]

## Sheet: Table S6
Supplemental Table S6. tRNA genes removed from statistical analysis
[truncated: 6 more rows]
