# Supplementary material for: Local features determine Ty3 targeting frequency at RNA polymerase III transcription start sites
Source: HighWire-hosted journal article supplement (doi:10.1101/gr.240861.118), 2019-06-27
Supplement: Supplemental_Figs_S1-S4.docx [file Supplemental_Figs_S1-S4.docx]

**Supplemental Material**

**Table of Contents**

Supplemental Fig. S1

Supplemental Fig. S2

Supplemental Fig. S3

Supplemental Fig. S4

Supplemental References

2-3

4-5

6-7

8-9

10

Supplemental Fig. S1


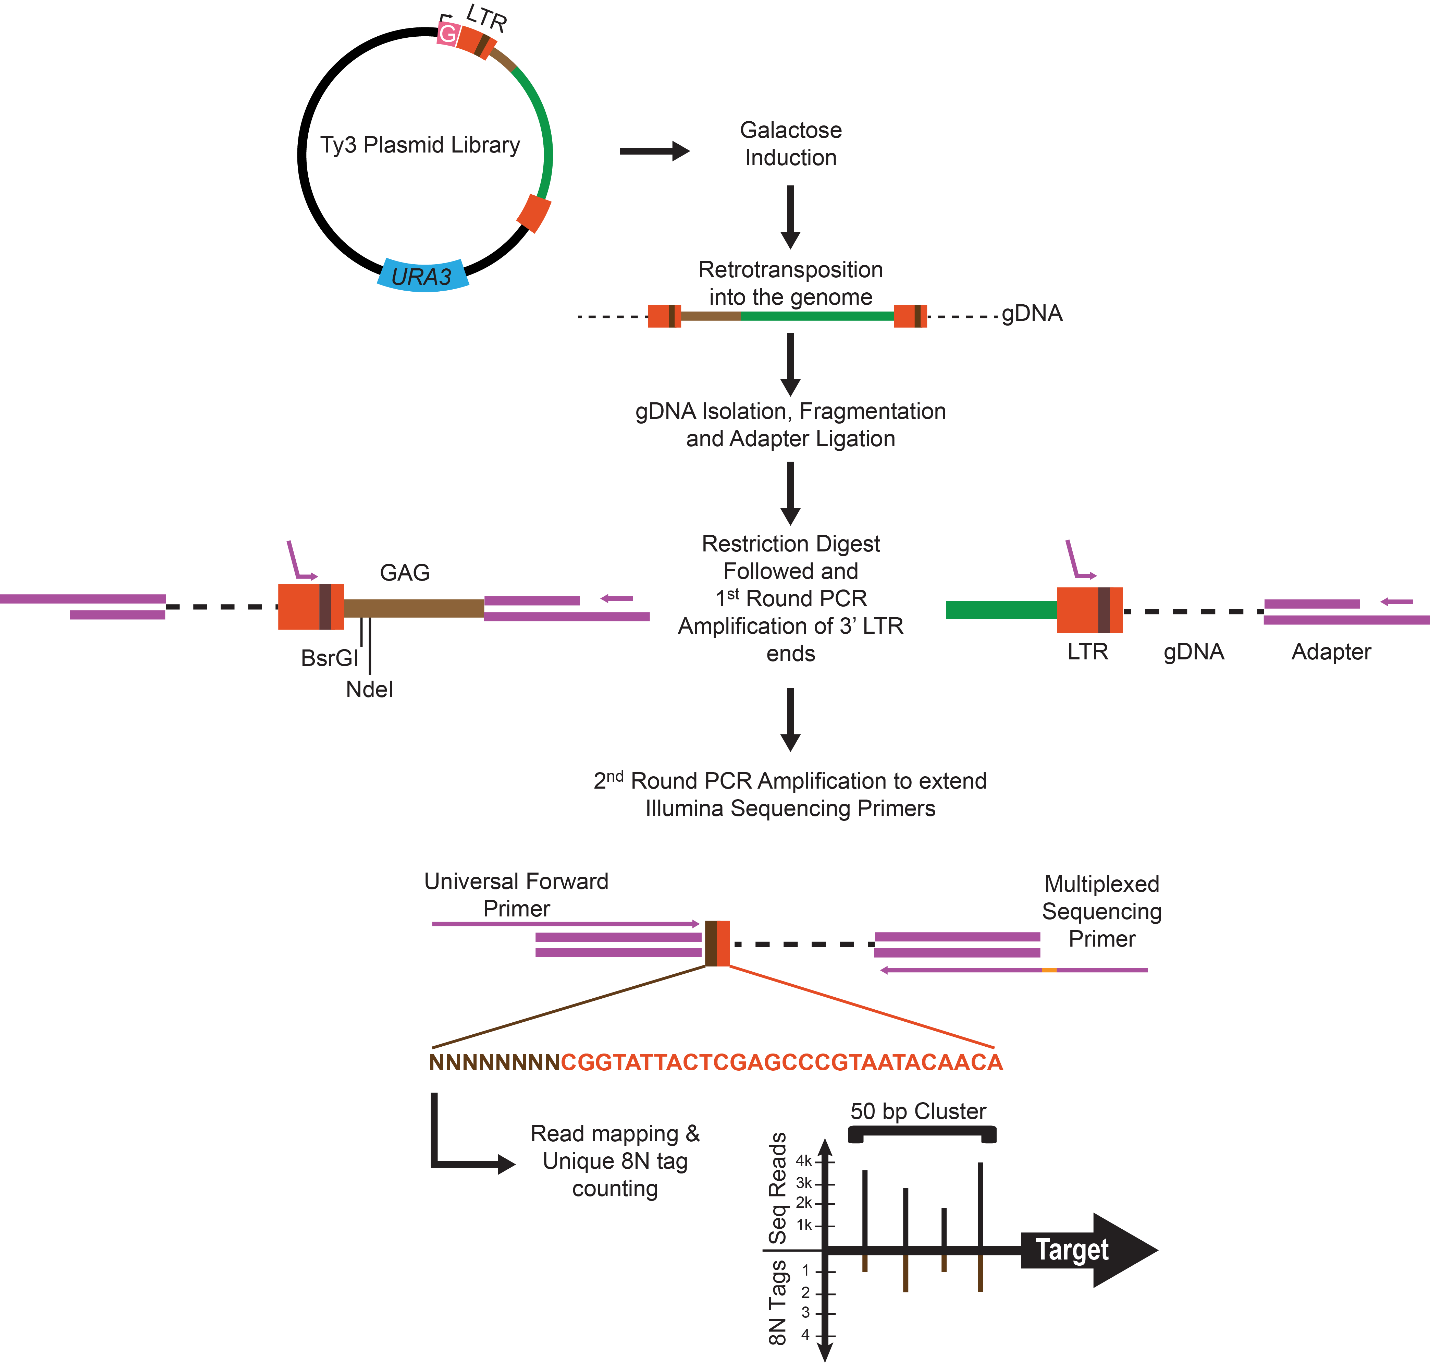


**Supplemental Fig. S1.** Retro-seq protocol for quantifying Ty3 8N tags at insertion sites. Galactose-inducible Ty3-8N is encoded on a plasmid containing *URA3* selectable marker. After insertion into the genome, sequencing libraries were prepared using a two-step PCR priming scheme (Supplemental Methods). First, forward priming is from the downstream internal domain region of Ty3, reverse priming is from the adapter. Second, forward priming is from the Illumina primer binding site contained on the U5 portion of the LTR. After mapping­, each unique 8N tag is counted once per insertion site for quantifying the frequency of integration events.

Supplemental Fig. S2

**
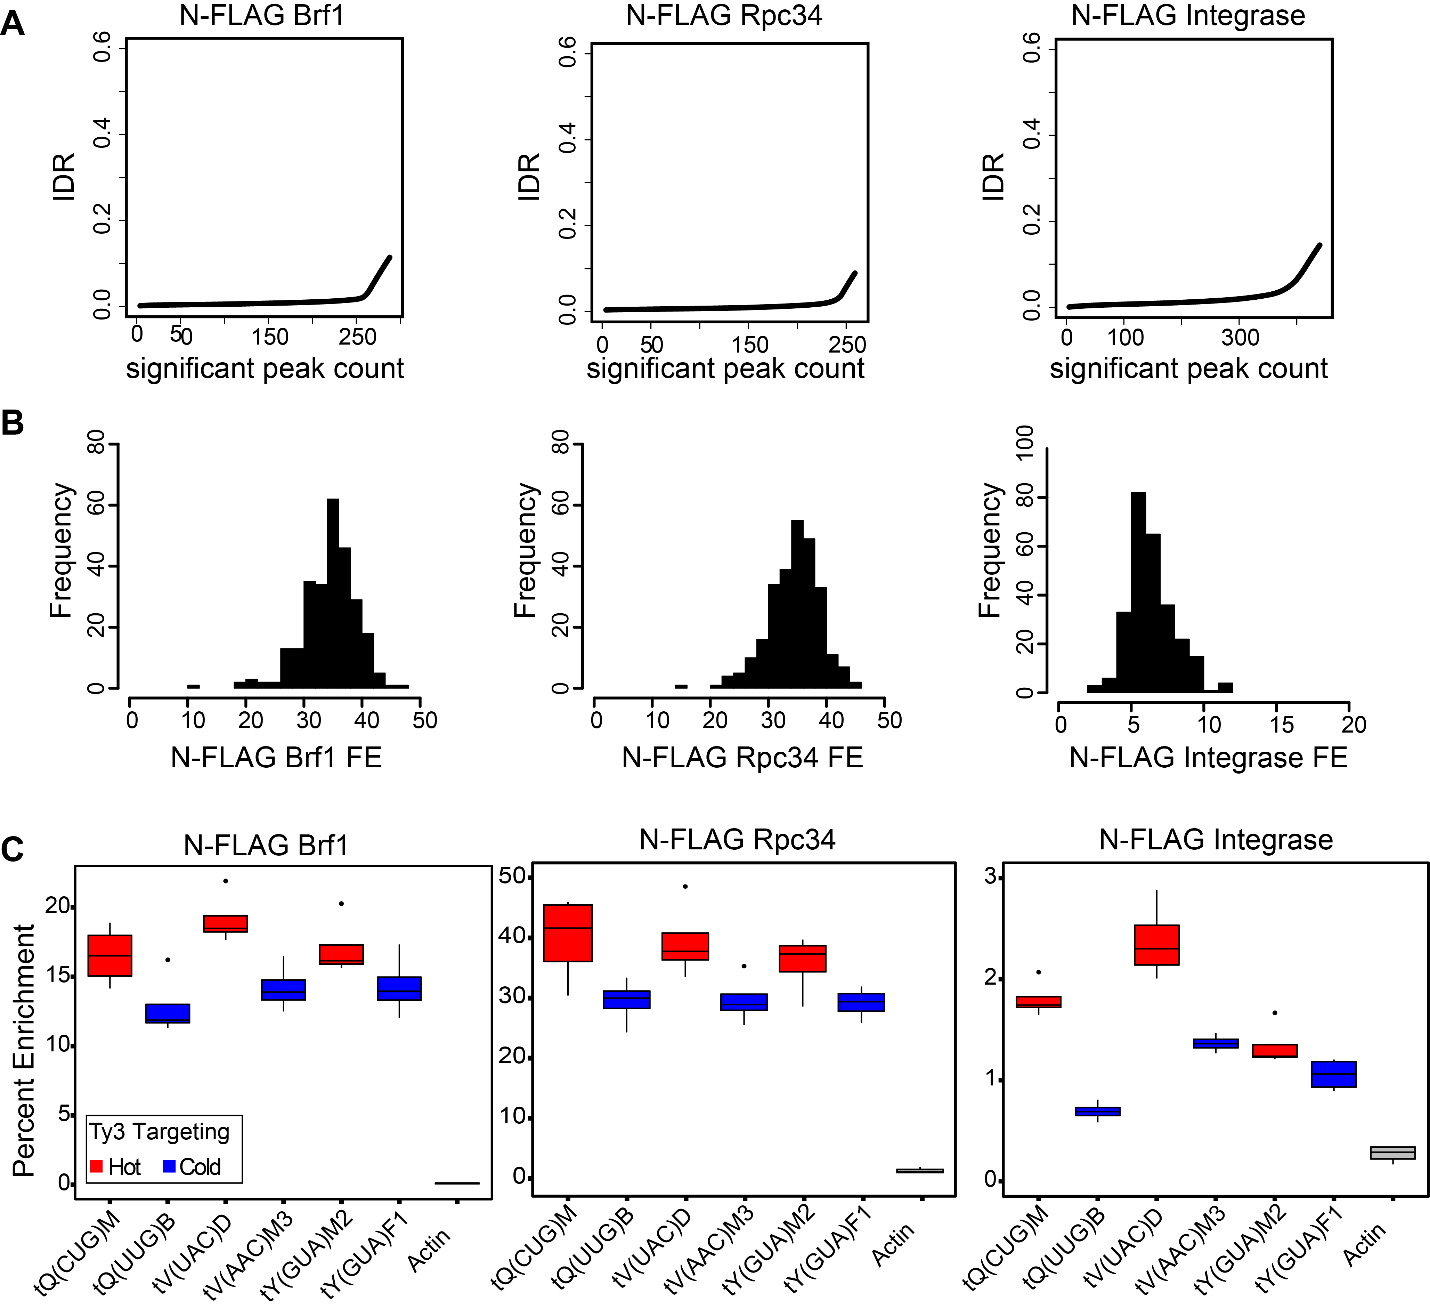
**

**Supplemental Fig. S2.** ChIP analysis of Brf1, Rpc34 and IN association with Ty3 insertion sites. (*A*) Analysis of ChIP-seq replicates for irreproducibility discovery rate (IDR). Brf1, Rpc34 or IN were compared by analyzing peaks only identified in one or the other replicate. (*B*) Histogram of frequency versus fold enrichment (FE) at Ty3 insertion sites (Methods, Supplemental Methods); (*C*) ChIP-qPCR of genomic Brf1, Rpc34, and ectopic IN to verify FE observed in ChIP-seq experiments. Results represent 2 independent experiments with 4 biological replicates each (N=8).

Supplemental Fig. S3

**
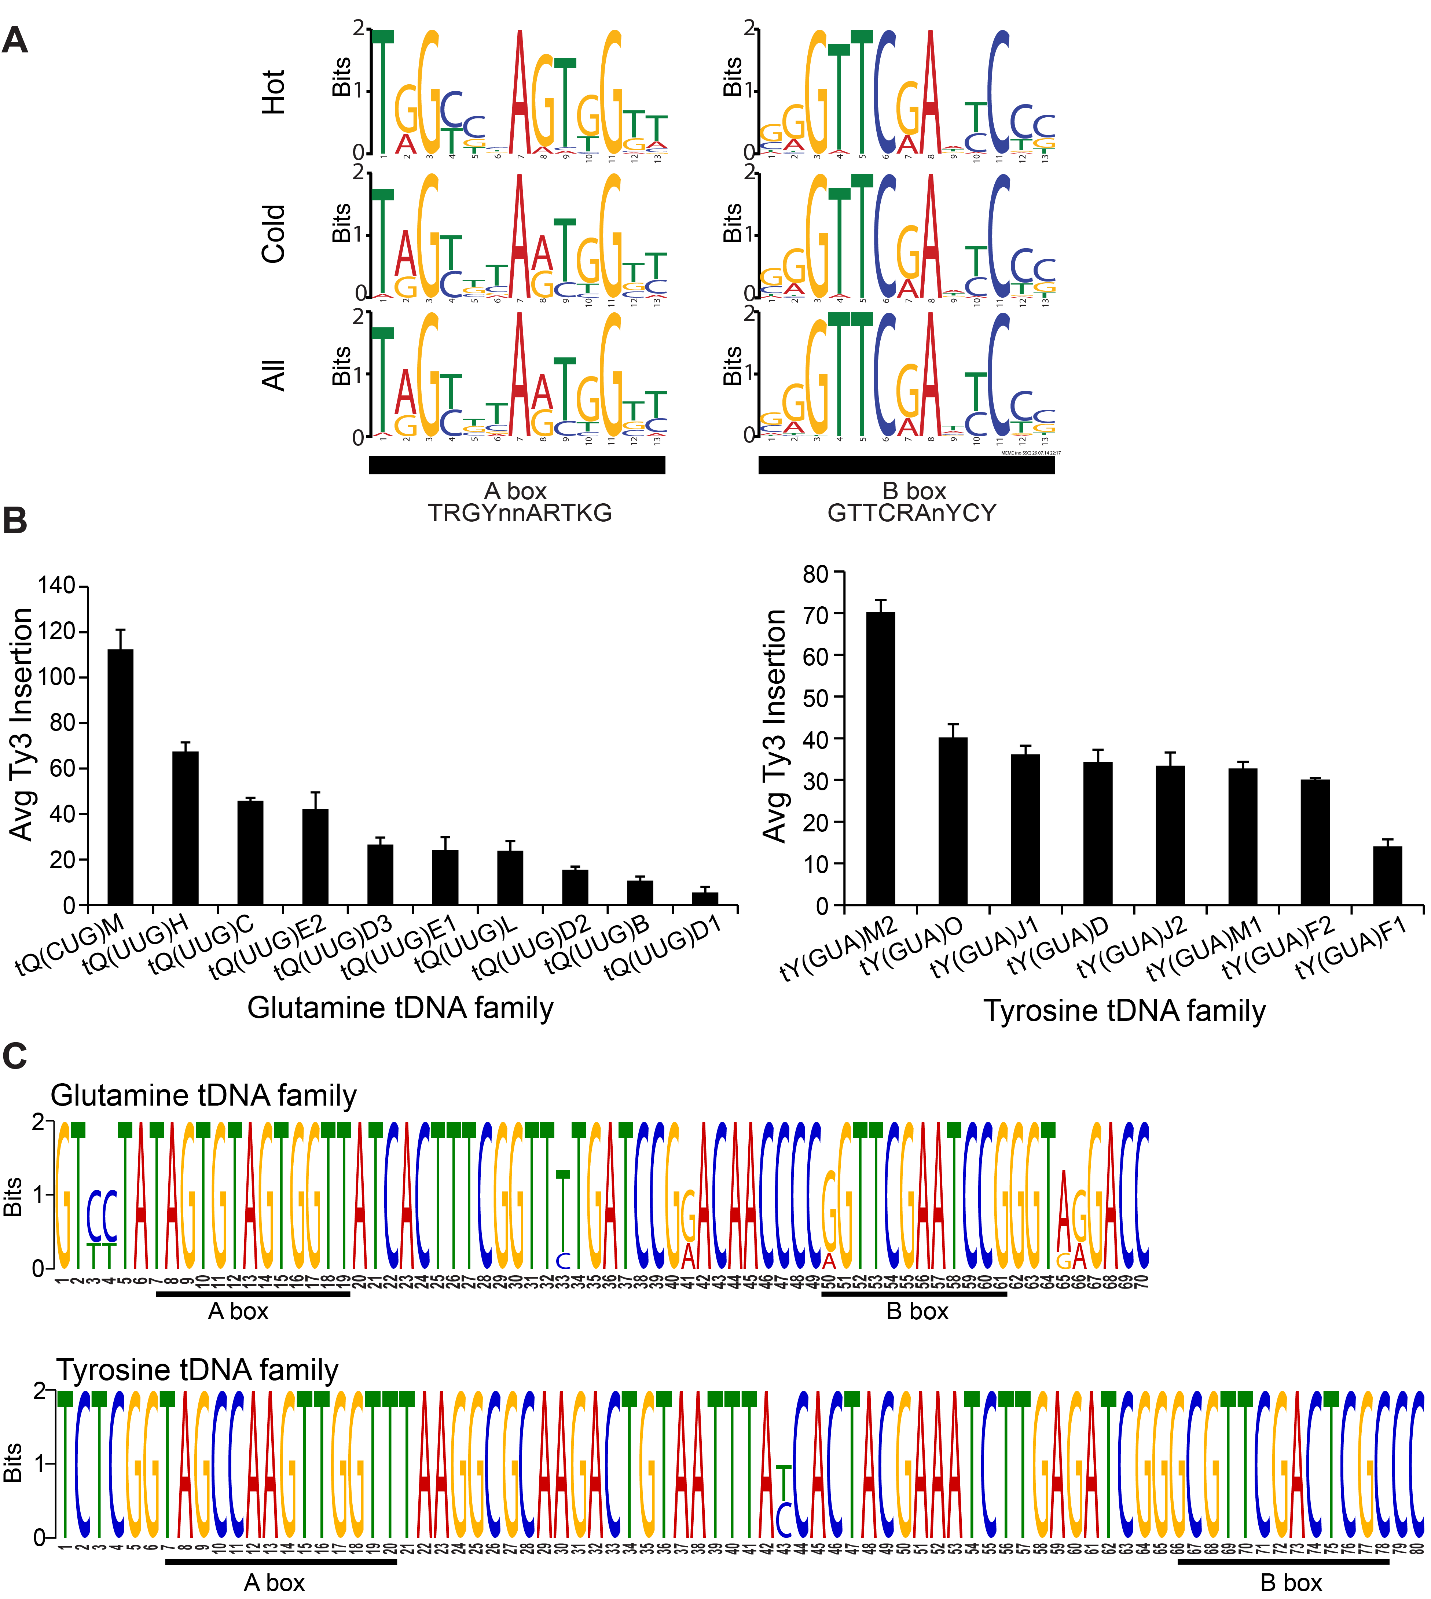
**

**Supplemental Fig. S3.** MEME analysis of A/B box promoters. Comparison of promoter elements at hot and cold tDNA targets. (*A*) A-box and B-box promoters were defined by MEME Suite for all tDNAs grouped by hot and cold or all together. (*B*) The average frequency of Ty3 insertion for the tQ and tY tDNA families. Standard deviation from the mean is indicated. (*C*) The consensus sequence of all tQ (top) or tY (bottom) tDNAs (MEME Suite), A- and B-box promoter elements are underlined.

Supplemental Fig. S4


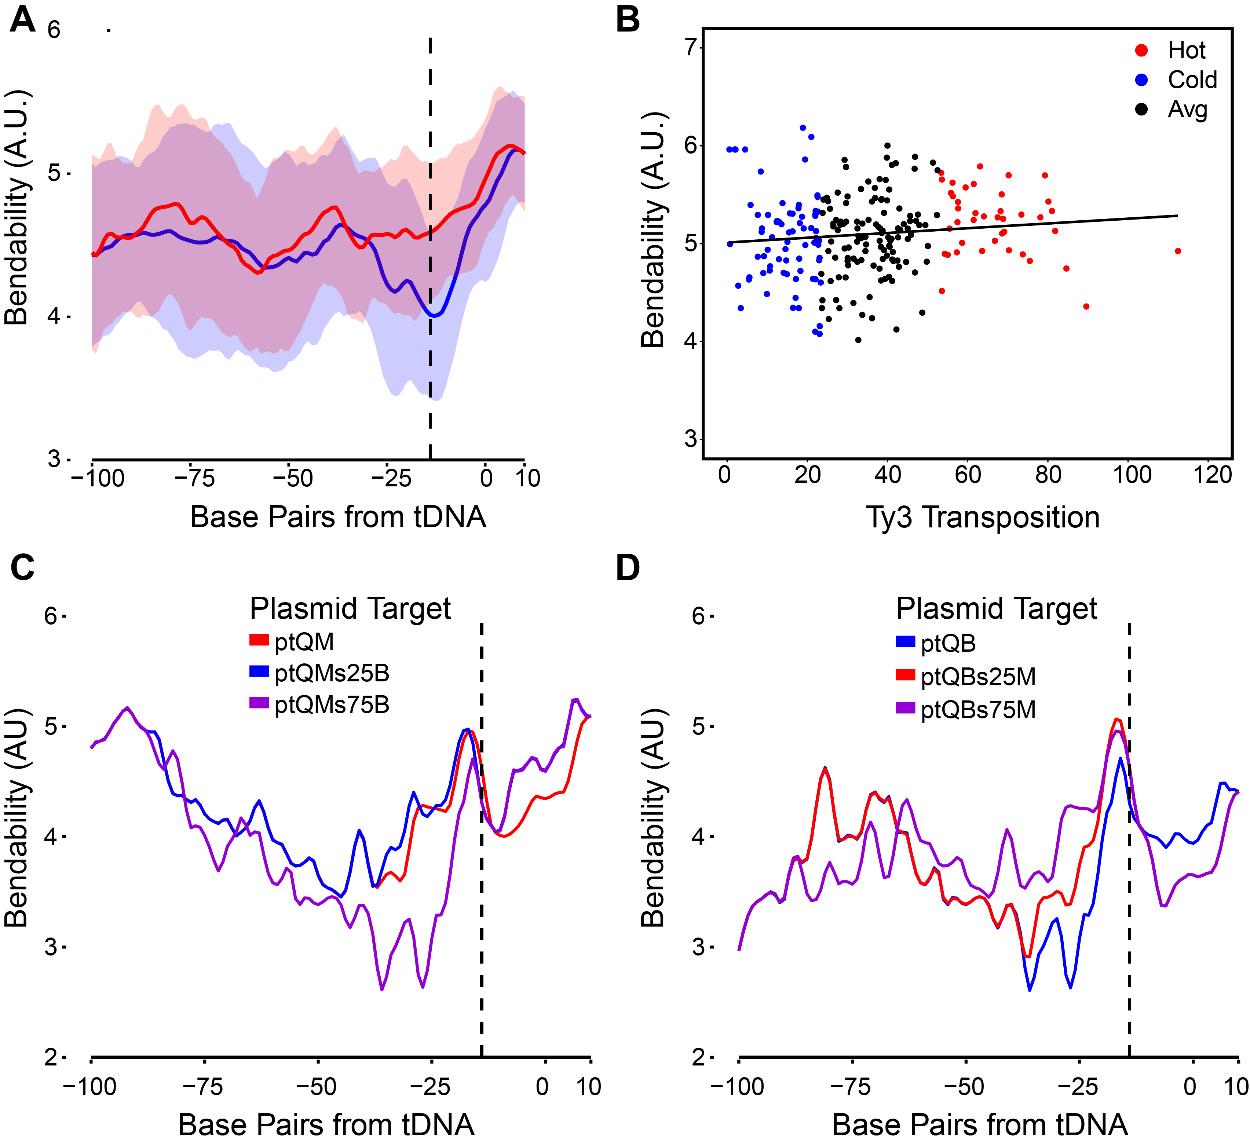


**Supplemental Fig. S4.** Role of bendability in target site determination. (*A*) Plot of bendability expressed as arbitrary units (AU) as determined by bend.it analysis ([Vlahovicek et al. 2003](#_ENREF_115)) of 100 bp upstream of tDNA for hot (tQM) and cold (tQB) targets. (*B*) Linear regression of bendability versus insertion frequency. (*C and D*) Plots of curvature of hot (ptQM) and cold (ptQB) plasmid targets and with either 25 or 75 bp of swapped sequences as described in legend of **Fig. 3**C.

**References**

Baker LA, Ueberheide BM, Dewell S, Chait BT, Zheng D, Allis CD. 2013. The yeast Snt2 protein coordinates the transcriptional response to hydrogen peroxide-mediated oxidative stress. *Mol Cell Biol* **33**: 3735-3748.

Bonnet J, Wang CY, Baptista T, Vincent SD, Hsiao WC, Stierle M, Kao CF, Tora L, Devys D. 2014. The SAGA coactivator complex acts on the whole transcribed genome and is required for RNA polymerase II transcription. *Genes Dev* **28**: 1999-2012.

Dewari PS, Bhargava P. 2014. Genome-wide mapping of yeast histone chaperone anti-silencing function 1 reveals its role in condensin binding with chromatin. PLoS One 9: e108652

Guillemette B, Drogaris P, Lin HH, Armstrong H, Hiragami-Hamada K, Imhof A, Bonneil E, Thibault P, Verreault A, Festenstein RJ. 2011. H3 lysine 4 is acetylated at active gene promoters and is regulated by H3 lysine 4 methylation. *PLoS Genet* **7**: e1001354.

Kumar Y, Bhargava P. 2013. A unique nucleosome arrangement, maintained actively by chromatin remodelers facilitates transcription of yeast tRNA genes. *BMC Genomics* **14**: 402.

Nagarajavel V, Iben JR, Howard BH, Maraia RJ, Clark DJ. 2013. Global 'bootprinting' reveals the elastic architecture of the yeast TFIIIB-TFIIIC transcription complex in vivo. *Nucleic Acids Res* **41**: 8135-8143.

Vlahovicek K, Kajan L, Pongor S. 2003. DNA analysis servers: plot.it, bend.it, model.it and IS. *Nucleic Acids Res* **31**: 3686-3687.

Watanabe S, Radman-Livaja M, Rando OJ, Peterson CL. 2013. A histone acetylation switch regulates H2A.Z deposition by the SWR-C remodeling enzyme. *Science* **340**: 195-199.

Zentner GE, Henikoff S. 2013a. Mot1 redistributes TBP from TATA-containing to TATA-less promoters. *Mol Cell Biol* **33**: 4996-5004.

Zentner GE, Tsukiyama T, Henikoff S. 2013. ISWI and CHD chromatin remodelers bind promoters but act in gene bodies. *PLoS Genet* **9**: e1003317.
