# Supplementary material for: Local features determine Ty3 targeting frequency at RNA polymerase III transcription start sites
Source: HighWire-hosted journal article supplement (doi:10.1101/gr.240861.118), 2019-06-27
Supplement: Supplemental_Methods.docx [file Supplemental_Methods.docx]

# Supplemental Methods

## Culture conditions and medium

*Escherichia coli* strain TOP10 (Invitrogen) was grown at 37°C in Lysogeny Broth (LB) medium supplemented with 100 µg/ml ampicillin or 25 µg/ml kanamycin to select for plasmid retention. Yeast were cultured at 30oC unless indicated. Yeast cells were grown in either complete medium (YPD) (1% yeast extract, 2% peptone, 2% dextrose) or in synthetic dextrose medium (SD) [0.67% yeast nitrogen base, 2% dextrose], containing complete amino acids, inositol and adenine sulfate lacking selection nutrients for selection and growth of cells transformed with plasmids containing particular prototrophic markers. Galactose-regulated expression of Ty3 was as follows. For derepression, cells were grown in synthetic raffinose (SR) medium [0.67% yeast nitrogen base, 1% raffinose, 2% v/v glycerol, 2% v/v sodium lactate] containing complete amino acids, inositol and adenine sulfate lacking selection nutrients. For induction of expression, cells were transferred to synthetic complete medium containing 2% galactose (SGal). For selection against uracil prototrophy, cells were grown on medium containing 5-fluoroorotic acid (5-FOA) ([Boeke et al. 1987](#_ENREF_1)).

## Strains

The reference parent strain BY4741 was used to produce all mutants (described in Supplemental Table S1). Brf1 and Rpc34 were both N-terminally tagged with 3X-FLAG peptide in their native genomic context by integration of a loxP-*LEU2*-Tef1p-loxP-3XFLAG cassette directly into the 5’-end of the gene at the upstream end of the ATG. While the cassette was present, transcription of the essential genes was constitutively expressed by the *TEF1* promoter (Tef1p). Subsequent transformation of a Cre recombinase-expressing plasmid (pBF3038, Supplemental Table S1) removed the *LEU2*-Tef1p cassette restoring the native promoter of each gene, but leaving the loxP-ATG-3XFLAG-gene sequence.

## Plasmids

A plasmid containing an unmarked, galactose-inducible Ty3 (pKN3097) was modified within the U5 region of the upstream LTR to contain an Illumina sequencing primer binding site (PBS) followed by a random 8 nt (8N) sequence (pGal-Ty3-8N). For sequencing out of the Ty3 LTR, a 19-bp Illumina primer binding sequence immediately followed by 8 bases of random sequence was cloned into U5 28 bases from the end of the upstream LTR (Supplemental Fig. S1;Supplemental Table 1). After retrotransposition this sequence occurs at the downstream end of the element adjacent to genomic DNA. To prepare a diverse plasmid library of uniquely tagged transposons, ~5,000 colonies of pGAL-Ty3-8N -transformed *E.coli* were pooled. Next 1mL (~1/10 of cells collected) of transformed *E. coli* was inoculated into 100 mL of LB + Ampicillin, and grown to early log phase. Plasmid DNA was prepared (Qiagen). The plasmid library was expected to contain ~5000 different random tags based on the number of transformants pooled. For ectopic IN experiments, β-estradiol–inducible IN-3XFLAG was made by cloning the entire β-estradiol induction system into a single plasmid. The Z4-ERV promoter and kanMX cassette were taken from pMN10-Z4ERV ([McIsaac et al. 2013](#_ENREF_11)) and cloned together with the artificial transcription factor (*ATF*) cassette into the backbone of pKN3097. For plasmid targeting of Ty3 to individual tDNAs, tDNA sequence plus ~120 bases of upstream and downstream flanking sequence were amplified by PCR and ligated into 2µ high-copy *LEU2* marked plasmids (Supplemental Table S1).

## DNA sequencing library preparation

Preparation of DNA sequencing libraries for Illumina sequencing was adapted from the Illumina Multiplex Sample Preparation Guide. Genomic DNA was extracted by mechanical shearing with glass beads, followed by phenol-chloroform extraction and alcohol precipitation. Isolated genomic DNA was treated with both RNase and protease after extraction. Approximately 5-10 µg of gDNA was sheared to 200-1000 bp in a 100 µl volume using the Biorupter Standard (Diagenode). DNA size was confirmed by gel electrophoresis. Sheared DNA was purified using the Zymo Clean and Concentrator with 5X ChIP DNA Binding Buffer (Genesee, Inc.). Next, DNA ends were blunted using the Fast DNA End Repair kit (ThermoFisher Scientific), adenylated on their 3’-end using the Klenow Exo- enzyme with 1 mM dATP (ThermoFisher Scientific), and ligated to adapters (Supplemental Table S1).

## Retro-seq

Three independent experiments were performed. The pGAL-Ty3-8N library was transformed into *S. cerevisiae* strain BY4741. Approximately 15-17,000 transformants were pooled together and mixed vigorously for each replicate. Transformant mixtures were resuspended in 50mL cultures of SR-Ura at an OD600 = 0.20 and grown 24 h for derepression. Cells were pelleted, washed and resuspended in SGal-Ura medium for 24 h to induce Ty3. Following induction, 1mL of induced culture was inoculated into YPD and grown overnight. Next, dilutions were plated on 5-FOA medium to select for cells that had lost the donor plasmid. After growth on 5-FOA medium, colonies (~15-17,000 per replicate) were again scraped and pooled for gDNA isolation and sequencing library preparation as described. For Retro-seq samples, custom adapters were used for ligation. After ligation, each sample was divided in half, digested using either *Bsr*GI or *Nde*I and then recombined. For each sample, three technical replicate PCR reactions (10 cycles of 95°-30 sec, 62°-30 sec, 72°-30 sec) were done using the high-fidelity KOD polymerase (EMD Millipore) with primers KP4007/XQ3678 which amplifies DNA from the internal Illumina Primer binding site to the adapter(Supplemental Fig. S1); note that each adapter is truncated on the leading strand so that only forward priming in the first PCR cycle will establish the reverse primer binding site. After column purification, a second round of PCR (10 cycles of 95°-30 sec, 62°-30 sec, 72°-30 sec) was done using the Illumina universal forward primer and a multiplexed reverse primer unique to each sample (Supplemental Table S1). Each sample was again split up into multiple technical replicates which were combined for DNA purification. After sequencing, reads were mapped to the sacCer3 *S. cerevisiae* genome (ftp://ftp.ncbi.nlm.nih.gov/genbank/genomes/Eukaryotes/fungi/Saccharomyces_cerevisiae/SacCer_Apr2011) using Bowtie ([Langmead et al. 2009](#_ENREF_10)). Scripts developed for cataloging unique Ty3 integration event are described in Supplemental Methods.

## Chromatin immunoprecipitation and ChIP-seq

Chromatin Immunoprecipitation (ChIP) protocols were based on examples from previous publications ([Kuras and Struhl 1999](#_ENREF_8); [Boukaba et al. 2004](#_ENREF_2); [Zentner and Henikoff 2013](#_ENREF_12); [Zentner et al. 2013](#_ENREF_13); [Kasinathan et al. 2014](#_ENREF_6)). Cells were cultured in conditions comparable to those used for Retro-seq, from fresh plate colonies were grown overnight in YPD or selective media then resuspended to OD600 = 0.2 in SR -Ura medium for 20-24 h. Next, SGal medium was inoculated at an OD600 = 0.2 and grown for 24 h, after which 100 mL YPD were inoculated at OD600 = 0.05 and grown to OD600 = ~1.0. For ectopic IN experiments, cells were transferred from SGal medium to YPD + G418 (0.3 mg/ml), grown for 2-3 h and then supplemented with 10 µM β-estradiol ~6 h prior to harvesting. All experiments were performed at room temperature. Upon collection, cultures were cross-linked for 15 min by addition of 1/10 culture volume of cross-link solution (50 mM HEPES-KOH pH 7.5, 100mM NaCl, 1 mM EDTA pH 8, 11% formaldehyde) at room temperature with very light shaking. Next cultures were quenched with 300 mM glycine and light shaking for 5 min. Cells were pelleted, washed with cold 1X PBS, and dry pellets were frozen in dry ice. For chromatin preparation, cell pellets were resuspended in Extraction Buffer (50 mM HEPES-KOH pH 7.5, 140 mM NaCl, 1 mM EDTA pH 8, 1% Triton-X) plus protease inhibitor cocktail (Sigma-Aldrich). Approximately 0.6 g of glass beads were added and cells were mechanically sheared at 4°C by vortexing for 30 min. Next lysates were pelleted at 4°C for 5 min and supernatants cleared. Cell pellets were resuspended in 700 µl of Extraction Buffer, divided into two aliquots and sonicated for 7-10 min in a Biorupter Standard (Diagenode). Sheared chromatin was evaluated by first treating with RNase and then Pronase E (Sigma-Aldrich) followed by gel electrophoresis. The Bradford assay was used to approximate the chromatin concentration ([Bradford 1976](#_ENREF_3)). For immunoprecipitations, 20 µl of Anti-FLAG M2 Magnetic Beads (Sigma-Aldrich) were washed in Extraction Buffer and incubated with 50 µg of chromatin and rotation overnight at 4°C. Following incubation beads were washed in Extraction Buffer with increasing concentrations of NaCl: 140 mM, 300 mM, 600 mM and final wash with 250 mM LiCl. Each wash was done for 5 minutes at 4°C with rotation. Beads were resuspended in 200 µl of 1X HE buffer (10 mM HEPES-KOH pH 7.5, 1 mM EDTA). For input control samples 5 µg of chromatin was diluted into 200 µl of 1X HE. IPs and input samples were treated with RNase (20 µg) for 1 h followed by Pronase E (40 µg) treatment for 4-5 h. DNA was purified using the Zymo DNA Clean and Concentrator kit with 5X ChIP-DNA Binding Buffer (Genesee, Inc.). Purified DNA was then used for qPCR or DNA sequencing.

For ChIP-seq each individual sample was ligated with an adapter set having a unique multiplex barcode for sequencing. Following ligation, samples were purified using the Agencourt AMPure XP purification beads (Beckman Coulter, Inc.) at a ratio of 1.5X beads to DNA volume and eluted in water. Nine replicate PCR reactions were made for each sample using primers 3689/5112. Approximately 4-6 ng DNA template was used per reaction. PCR was done using the high-fidelity KOD polymerase with conditions 95°C 5 minutes, 5 cycles of 95°C 30 seconds 65°C 30 seconds 70°C 30 seconds, followed by 10 cycles of 95°C 30 seconds 61°C 30 seconds 70°C 30 seconds, and a final 70°C for 2 minutes. All sequencing libraries were first evaluated by gel electrophoresis, then submitted to the University of California, Irvine Genomics High-throughput Facility for Bioanalyzer 2100 (Agilent) analysis, KAPA quantification for sample mixing and paired-end 100-base sequencing on the Illumina Hi-Seq 2500. ChIP-qPCR was done at several genomic tDNA sites and *ACT1*. For each experiment, Input and IP samples recovered from ChIP were assayed using the primers described in Supplemental Table S1. Percent enrichment was calculated using the formula 100*2[(Input Cq + log2DF) - IP Cq].

## ChIP-seq data analysis

Fastq files were mapped to the sacCer3 genome using Bowtie2 ([Langdon 2015](#_ENREF_9)). To be as quantitative as possible, only reads which mapped to one location with concordant mate pairs were used for downstream analysis. For Brf1 and Rpc34 experiments, an untagged wild-type sample was identically treated and sequenced. For an IN-FLAG ChIP-seq control, an empty vector replicate was included. Peak calling and fold enrichment (FE) analysis were done using MACS2 ([Zhang et al. 2008](#_ENREF_14); [Feng et al. 2012](#_ENREF_5)); for all three proteins, strong reproducibility with replicate samples was observed (Supplemental Fig. S2).

## Quantitative PCR

All qPCR experiments were done using the CFX96 C1000 Touch (Bio-Rad). For ChIP-qPCR experiments percent enrichment of input was calculated using the formula 2-[Elution Cq-(Input Cq+log2DF)]*100. BY4741 (Brf1 or Rpc34) or BY4741 + empty β-estradiol –induced vector pKP3915 (IN control) were used as negative controls. Negative control values were subtracted from corresponding samples. All primers used for qPCR experiments are described in Supplemental Table S1.

## Ty3 plasmid-transposition assay

The Ty3 expression plasmid (pGal-Ty3-8N) and a target tDNA plasmid were co-transformed into BY4741. Transformants were colony-purified on SD-Ura-Leu and confirmed for the presence of both Ty3 expression and target plasmids via PCR with primer sets XQ3659/KP4288 and BH4274/BH4275, respectively. Colonies were cultured in 5 mL SD-Ura-Leu at 30°C overnight, pelleted and washed before inoculating to 0.2 OD600 in 50 mL of SR-Ura-Leu and incubated at 23°C for 24 hrs with 200 rpm shaking. Ty3 was induced by again pelleting, washing and resupending cells to 0.2 OD600 in 50 mL of SGal-Ura-Leu and growing at 23°C for 24 hrs. Plasmid DNA was extracted from approximately 15 OD600 of cells using the GeneJET Plasmid Miniprep kit (ThermoFisher Scientific) with twice the recommended volume of reagents and 20-30 min of glass bead vortexing during resuspension. Ty3 plasmid-transposition was quantified from 20 ng of recovered plasmid DNA. Transposition was measured in both orientations relative to the target tDNA using Ty3 LTR primer KP4660 and reverse primers VB2275 (sense) or KP4996 (anti-sense). Total plasmid was quantified using primers BH4274 and BH4275 in the *LEU2* marker. Sense and anti-sense transposition Cq values were each separately normalized to *LEU2* using the formula 2-(Ty3 Cq – *LEU2* Cq), and then added together for a combined transposition signal. For each glutamine set, the 25 bp and 75 bp target swaps were normalized relative to the wild type, which was arbitrarily set to 100 %. Transposition frequencies for hot and cold wild-type tDNA plasmids were normalized to standard curves from pCR®2.1 TOPO® (ThermoFisher Scientific Inc.) vectors containing qPCR products. Total copy number of sense and anti-sense transposition was normalized to *LEU2*.

## Transcription assay from plasmid-borne tDNAs

RNAP3 transcription of specific plasmid-borne tDNAs was done by extending the mature 3’-end of the tDNA with the *URA3* derived sequence 5’-GGAACGGCTGCTACTCATCCTAGTCCGTTGCTG-3’. BY4741 cultures containing plasmids with modified tDNA 3’ ends (Supplemental Table 1) were grown identically to plasmid transposition experiments except that cells were isolated after ~12 h of SG induction (OD600 of ~1.0); cells were pelleted at room temperature, washed once in water and frozen on dry ice. RNA extraction was done with the Yeastar RNA isolation kit (Genesee, Inc.) which can purify RNAs as small as 17 bp. Next, preparations were cleared of DNA using DNAseI (ThermoFisher Scientific, Inc.), followed by RNA purification using the RNA Clean and Concentrator kit (Genesee, Inc.). RNA quality was confirmed on an agarose gel. Next cDNA was made from 1 µg of RNA using the iScript Reverse Transcription Supermix (Bio-Rad Laboratories, Inc.); resulting samples were diluted 1/5 and used directly for qPCR. cDNA was used to amplify each tRNA plus the transcribed *LEU2* and *SUP61*. For normalization the Cq values were first normalized to genomic *SUP61* and then *LEU2* as follows: 2-[(tRNA Cq- SUP61 Cq) - (LEU2 Cq - SUP61 Cq)]. For each glutamine set, the 25 bp and 75 bp target swaps were normalized relative to the wild type, which was arbitrarily set to one. Transcription assays comparing ptQMt and ptQBt were normalized to standard curves as above.

## Sequence analysis: read trimming and filtering

The paired sequencing reads for each sample were first trimmed using in-house tools in order to remove the random 8bp tags and the 28bp Ty3 LTR sequences attached to the genomic DNA on the 5' end of each first read. Paired reads for which the 28bp Ty3 LTR sequence was not found at the expected position or for which at least one base of the random 8bp tag was not called by the sequencer (N) were discarded at this stage of the analysis and were not considered further in this study.

## Sequence analysis: Filtered reads alignment to reference genome sacCer3

The filtered and trimmed paired reads were aligned to the reference genome sacCer3 using ELAND v2e (Illumina) short-read aligner with its default settings. The sequencing reads are considered located on the reference genome by the short-read aligner if there is a unique best match with up to two mismatches in the first 25 bp of each read. Paired reads mapped with more than two differences with the reference sequence in the first 25 bp of either read and paired reads mapped to multiple locations on the genome with an identical number of mismatches were rejected.

## Sequence analysis: Insertion sites identification and random 8bp tags counting

The Ty3 insertion sites were directly deduced from the alignment results. For each aligned paired read, the position of the first base of the first read on the reference genome and the strand on which the first read was located by the short-read aligner were used to identify the corresponding insertion site. For each resulting insertion site, we then listed and counted all the random tags originally attached to the corresponding reads using in-house tools made available in Supplemental_SeqAnalysis.zip.

## Sequence analysis: insertion sites and random 8-bp tags filtering

In order to remove numerous insertion events observed only a few times and for which the confidence of the insertion event is low, we filtered the initial lists of insertion sites and random tags by first removing all the random tags observed less than 50 times at each insertion site and then removing all the insertion sites with no random tag left after filtering. This filtering step was performed using in-house tools also made available in Supplemental_SeqAnalysis.zip.

## Sequence analysis: data enrichment

Each insertion site was annotated to provide information on the surrounding genes, including the closest genes upstream and downstream the insertion site but also the closest genes to which the insertion sites are upstream. The gene annotations used for this step of the analysis were directly extracted from the SGD database ([Cherry et al. 2012](#_ENREF_4)). A few additional gene annotations available in the UCSC Genome Browser database ([Kent et al. 2002](#_ENREF_7)) were also considered during this step. Many insertion sites were observed next to each other or very close to each other on the reference genome suggesting an identical target for these insertion sites. After confirming these insertion sites have an identical target based on the gene annotations added as explained above, we clustered these insertion sites together using a cluster length limit of 50bp. Results are provided in Supplemental_SeqAnalysis.zip.

# References

Boeke JD, Trueheart J, Natsoulis G, Fink GR. 1987. 5-Fluoroorotic acid as a selective agent in yeast molecular genetics. *Methods Enzymol* **154**: 164-175.

Boukaba A, Georgieva EI, Myers FA, Thorne AW, Lopez-Rodas G, Crane-Robinson C, Franco L. 2004. A short-range gradient of histone H3 acetylation and Tup1p redistribution at the promoter of the Saccharomyces cerevisiae SUC2 gene. *J Biol Chem* **279**: 7678-7684.

Bradford MM. 1976. A rapid and sensitive method for the quantitation of microgram quantities of protein utilizing the principle of protein-dye binding. *Anal Biochem* **72**: 248-254.

Cherry JM, Hong EL, Amundsen C, Balakrishnan R, Binkley G, Chan ET, Christie KR, Costanzo MC, Dwight SS, Engel SR et al. 2012. Saccharomyces Genome Database: the genomics resource of budding yeast. *Nucleic Acids Res* **40**: D700-705.

Feng J, Liu T, Qin B, Zhang Y, Liu XS. 2012. Identifying ChIP-seq enrichment using MACS. *Nat Protoc* **7**: 1728-1740.

Kasinathan S, Orsi GA, Zentner GE, Ahmad K, Henikoff S. 2014. High-resolution mapping of transcription factor binding sites on native chromatin. *Nat Methods* **11**: 203-209.

Kent WJ, Sugnet CW, Furey TS, Roskin KM, Pringle TH, Zahler AM, Haussler D. 2002. The human genome browser at UCSC. *Genome Res* **12**: 996-1006.

Kuras L, Struhl K. 1999. Binding of TBP to promoters in vivo is stimulated by activators and requires Pol II holoenzyme. *Nature* **399**: 609-613.

Langdon WB. 2015. Performance of genetic programming optimised Bowtie2 on genome comparison and analytic testing (GCAT) benchmarks. *BioData mining* **8**: 1.

Langmead B, Trapnell C, Pop M, Salzberg SL. 2009. Ultrafast and memory-efficient alignment of short DNA sequences to the human genome. *Genome Biol* **10**: R25.

McIsaac RS, Oakes BL, Wang X, Dummit KA, Botstein D, Noyes MB. 2013. Synthetic gene expression perturbation systems with rapid, tunable, single-gene specificity in yeast. *Nucleic Acids Res* **41**: e57.

Zentner GE, Henikoff S. 2013. Mot1 redistributes TBP from TATA-containing to TATA-less promoters. *Mol Cell Biol* **33**: 4996-5004.

Zentner GE, Tsukiyama T, Henikoff S. 2013. ISWI and CHD chromatin remodelers bind promoters but act in gene bodies. *PLoS Genet* **9**: e1003317.

Zhang Y, Liu T, Meyer CA, Eeckhoute J, Johnson DS, Bernstein BE, Nusbaum C, Myers RM, Brown M, Li W et al. 2008. Model-based analysis of ChIP-Seq (MACS). *Genome Biol* **9**: R137.
